# Supplementary material for: A calibrated human Y-chromosomal phylogeny based on resequencing
Source: HighWire-hosted journal article supplement (doi:10.1101/gr.143198.112), 2012-10-04
Supplement: Supplemental_Table1_UniqueRegions.xlsx [file Supplemental_Table1_UniqueRegions.xlsx]

## Sheet: Sheet1
Region number	Start landmark STSs	Position (NCBI36/hg18)	Position (GRCh37/hg19)	End landmark STSs	Position (NCBI36/hg18)	Position (GRCh37/hg19)	Size
1	SY1247	2709807	2649807	SY1248	2977723	2917723	267916
2	SY605	6676752	6616752	SY1219	7532224	7472224	855472
3	SY1251	12380438	13870438	SY1303	14605180	16095786	2225348
4	SY1274	14680008	16170614	SY1312	16495867	17986473	1815859
5	SY1304	16526489	18017095	SY1275	16780667	18271273	254178
6	SY1276	17047240	18537846	SY1264	18076750	19567356	1029510
7	SY1287	19491609	21032221	SY1252	20675546	22216158	1183937
8	SY1253	20922508	22513120	SY132	21907049	23497661	984541
9	SY1201	26867381	28457993	SY1246	27216146	28806758	348765
