# Supplementary material for: A calibrated human Y-chromosomal phylogeny based on resequencing
Source: HighWire-hosted journal article supplement (doi:10.1101/gr.143198.112), 2012-10-04
Supplement: Supplemental_Table3_MissenseSNPs.docx [file Supplemental_Table3_MissenseSNPs.docx]

| Position  (GRCh37) | Ancestral allele | Reference allele | Derived allele | Codon | Amino acid | Gene | Strand | Impact |
| --- | --- | --- | --- | --- | --- | --- | --- | --- |
| 14832620* | T | G | T | gaG/gaU | Glutamic/Aspartic | *USP9Y* | +1 | MISSENSE |
| 14838700* | C | C | T | Cgu/Ugu | Arginine/Cysteine | *USP9Y* | MISSENSE |
| 14959237 | C | C | G | uCc/uGc | Serine/Cysteine | *USP9Y* | MISSENSE |
| 21867887 | G | G | T | caG/caU | Glutamine/Histidine | *KDM5D* | -1 | MISSENSE |
| 21897321 | A | A | G | Aca/Gca | Threonine/Alanine | *KDM5D* | MISSENSE |
| 2846005 | A | A | G | aAc/aGc | Asparagine/Serine | *ZFY* | +1 | MISSENSE |

Table S3. Missense SNPs.

*These missense SNPs were also detected in Rozen et al., 2009.
