# Supplementary material for: A calibrated human Y-chromosomal phylogeny based on resequencing
Source: HighWire-hosted journal article supplement (doi:10.1101/gr.143198.112), 2012-10-04
Supplement: Supplemental_Table4_Coverage.xlsx [file Supplemental_Table4_Coverage.xlsx]

## Sheet: Sheet1
Supplemental Table 4. Coverage and number of variants in each Complete Genomics sample
Sample ID	Average coverage in Y unique regions	Number of variants called
GS06994	28	923
GS07357	25	232
GS10851	33	263
GS12877	28	232
GS12882	31	244
GS12883	30	239
GS12884	28	234
GS12886	26	222
GS12888	30	229
GS12889	32	228
GS12891	32	946
GS12893	31	249
GS18501	33	1228
GS18504	34	1257
GS18558	34	868
GS18940	33	1224
GS19020	21	1173
GS19025	22	1167
GS19026	21	1157
GS19239	35	1209
GS19649	21	210
GS19670	19	803
GS19700	22	1166
GS19703	20	1189
GS19735	29	659
GS19834	29	1231
GS20509	28	244
GS20510	31	1255
GS20511	31	935
GS20845	32	606
GS20846	31	529
GS20850	30	522
GS21732	30	1257
GS21737	29	1233
HG00731	24	224
Highest and lowest numbers highlighted
