# Supplementary material for: A calibrated human Y-chromosomal phylogeny based on resequencing
Source: HighWire-hosted journal article supplement (doi:10.1101/gr.143198.112), 2012-10-04
Supplement: Supplemental_Table5_HapMap3Concordance.xlsx [file Supplemental_Table5_HapMap3Concordance.xlsx]

## Sheet: Sheet1
Table S5 Concordance between HapMap3 and Complete Genomics genotype calls
Position	dbSNP Ids	GS07357		GS12889		GS18501		GS18504		GS18558		GS18940		GS19700		GS19703		GS19834		GS20509		GS20510
(GRCh37)		1a	2b	1	2	1	2	1	2	1	2	1	2	1	2	1	2	1	2	1	2	1	2
2655180	rs11575897	G	G	G	G	G	G	G	G	G	G	G	G	G	G	G	G	G	G	G	G	G	G
2657176	rs2534636	C	C	C	C	C	C	C	C	C	C	C	C	C	C	C	C	C	C	C	C	C	C
2657176	rs2534636	C	C	C	C	C	C	C	C	C	C	C	C	C	C	C	C	C	C	C	C	C	C
2734854	rs35284970	C	C	C	C	C	C	C	C	C	C	C	C	C	C	C	C	C	C	C	C	C	C
2828196	rs2267801	T	T	T	T	T	T	T	T	T	T	T	T	T	T	T	T	T	T	T	T	T	T
2828425	rs2267802	A	A	A	A	A	A	A	A	A	A	G	G	A	A	A	A	A	A	A	A	A	A
4888783	rs2032600	A	A	A	A	A	A	A	A	A	A	A	A	A	A	A	A	A	A	A	A	A	A
6941218	rs9306845	A	A	A	A	G	G	G	G	A	A	G	G	G	G	G	G	G	G	A	A	G	G
6965215	rs16981311	C	C	C	C	T	T	T	T	C	C	C	C	T	T	T	T	T	T	C	C	T	T
7395806	rs9786877	G	G	G	G	C	C	C	C	G	G	C	C	C	C	C	C	C	C	G	G	C	C
14001232	rs17316007	A	A	A	A	A	A	A	A	A	A	A	A	A	A	A	A	A	A	A	A	A	A
14159846	rs16980473	C	C	C	C	T	T	T	T	C	C	C	C	T	T	T	T	T	T	C	C	T	T
14197867	rs4141886	A	A	A	A	G	G	G	G	A	A	G	G	G	G	G	G	G	G	A	A	G	G
14433100	rs2740981	A	A	A	A	G	G	G	G	G	G	G	G	G	G	G	G	G	G	A	A	G	G
14486667	rs34043621	T	T	T	T	T	T	T	T	T	T	T	T	T	T	T	T	T	T	T	T	T	T
14790163	rs3913	A	A	A	A	A	A	A	A	A	A	A	A	A	A	A	A	A	A	A	A	A	A
14804077	rs9786191	G	G	G	G	A	A	A	A	G	G	G	G	A	A	A	A	A	A	G	G	A	A
14813717	rs2032594	T	T	T	T	T	T	T	T	T	T	T	T	T	T	T	T	T	T	T	T	T	T
14850341	rs2032598	T	T	T	T	C	C	C	C	T	T	T	T	C	C	C	C	C	C	T	T	T	T
14869076	rs2032601	C	C	C	C	C	C	C	C	C	C	C	C	C	C	C	C	C	C	C	C	C	C
14898163	rs20320	G	G	G	G	G	G	G	G	G	G	G	G	G	G	G	G	G	G	G	G	G	G
14902414	rs20321	G	G	G	G	G	G	G	G	G	G	G	G	G	G	G	G	G	G	G	G	G	G
14904859	rs2032607	C	C	C	C	C	C	C	C	C	C	C	C	C	C	C	C	C	C	C	C	C	C
14922583	rs34442126	T	T	T	T	T	T	T	T	T	T	T	T	T	T	T	T	T	T	T	T	T	T
14968527	rs2032603	A	A	A	A	A	A	A	A	A	A	A	A	A	A	A	A	A	A	A	A	A	A
14969634	rs2032604	T	T	T	T	T	T	T	T	T	T	T	T	T	T	T	T	T	T	T	T	T	T
15014550	rs2032677	T	T	T	T	T	T	T	T	T	T	T	T	T	T	T	T	T	T	T	T	T	T
15018459	rs8179022	G	G	G	G	G	G	G	G	G	G	G	G	G	G	G	G	G	G	G	G	G	G
15018582	rs8179021	C	C	C	C	C	C	C	C	C	C	C	C	C	C	C	C	C	C	C	C	C	C
15019613	rs2032590	T	T	T	T	T	T	G	G	T	T	T	T	T	T	T	T	G	G	T	T	T	T
15020578	rs9341290	T	T	T	T	T	T	T	T	T	T	T	T	T	T	T	T	T	T	T	T	T	T
15023364	rs9341301	T	T	T	T	T	T	T	T	T	T	T	T	T	T	T	T	T	T	T	T	T	T
15333149	rs1236440	T	T	C	C	C	C	C	C	C	C	C	C	C	C	C	C	C	C	T	T	C	C
15436316	rs2032667	G	G	G	G	G	G	G	G	G	G	G	G	G	G	G	G	G	G	G	G	G	G
15436915	rs2032669	T	T	T	T	T	T	T	T	T	T	T	T	T	T	T	T	T	T	T	T	T	T
15437063	rs2032671	C	C	C	C	C	C	C	C	C	C	C	C	C	C	C	C	C	C	C	C	C	C
15437333	rs2032668	A	A	A	A	A	A	A	A	A	A	A	A	A	A	A	A	A	A	A	A	A	A
15437564	rs2032666	C	C	C	C	C	C	C	C	C	C	C	C	C	C	C	C	C	C	C	C	C	C
15469724	rs9341278	G	G	G	G	G	G	G	G	A	A	G	G	G	G	G	G	G	G	G	G	G	G
15469740	rs13447376	C	C	C	C	C	C	C	C	C	C	C	C	C	C	C	C	C	C	C	C	C	C
15472863	rs9786043	T	T	T	T	C	C	C	C	T	T	C	C	C	C	C	C	C	C	T	T	C	C
15526751	rs2032665	C	C	C	C	T	T	T	T	C	C	T	T	T	T	T	T	T	T	C	C	T	T
15544614	rs2032663	C	C	C	C	C	C	C	C	C	C	C	C	C	C	C	C	C	C	C	C	C	C
15576203	rs2032659	C	C	C	C	C	C	C	C	C	C	C	C	C	C	C	C	C	C	C	C	C	C
15579215	rs16980558	A	A	A	A	G	G	A	A	A	A	A	A	G	G	G	G	A	A	A	A	A	A
15590342	rs17307070	T	T	T	T	G	G	G	G	G	G	G	G	G	G	G	G	G	G	T	T	G	G
15591447	rs9341275	C	C	C	C	C	C	C	C	C	C	C	C	C	C	C	C	C	C	C	C	C	C
15754313	rs917759	C	C	C	C	C	C	C	C	C	C	C	C	C	C	C	C	C	C	C	C	C	C
15809326	rs16980360	G	G	G	G	A	A	A	A	G	G	G	G	A	A	A	A	A	A	G	G	A	A
15935524	rs7067279	T	T	T	T	G	G	G	G	T	T	T	T	G	G	G	G	G	G	T	T	G	G
16253694	rs16980588	G	G	G	G	A	A	G	G	G	G	G	G	A	A	A	A	G	G	G	G	G	G
16338537	rs9786301	G	G	G	G	A	A	A	A	G	G	G	G	A	A	A	A	A	A	G	G	A	A
16839499	rs17222279	G	G	G	G	G	G	G	G	G	G	G	G	G	G	G	G	G	G	G	G	G	G
16846439	rs9786893	C	C	C	C	A	A	A	A	C	C	C	C	A	A	A	A	A	A	C	C	A	A
17256018	rs16980499	T	T	T	T	C	C	C	C	T	T	C	C	C	C	C	C	C	C	T	T	C	C
17285993	rs17307398	T	T	T	T	C	C	C	C	C	C	C	C	C	C	C	C	C	C	T	T	C	C
17294958	rs16980502	C	C	C	C	T	T	C	C	C	C	C	C	T	T	T	T	C	C	C	C	C	C
17508337	rs17222419	T	T	T	T	C	C	C	C	C	C	C	C	C	C	C	C	C	C	T	T	C	C
18028661	rs17307656	G	G	G	G	A	A	A	A	A	A	A	A	A	A	A	A	A	A	G	G	A	A
18578476	rs16980391	A	A	A	A	G	G	G	G	A	A	G	G	G	G	G	G	G	G	A	A	G	G
18647042	rs17269928	A	A	A	A	A	A	A	A	A	A	A	A	A	A	A	A	A	A	A	A	A	A
18964263	rs17315758	G	G	G	G	A	A	A	A	A	A	A	A	A	A	A	A	A	A	G	G	A	A
19038302	rs17315772	A	A	A	A	A	A	A	A	A	A	A	A	A	A	A	A	A	A	A	A	A	A
19166861	rs17315821	T	T	T	T	T	T	T	T	T	T	T	T	T	T	T	T	T	T	T	T	T	T
19198212	rs9786119	G	G	G	G	A	A	A	A	A	A	A	A	A	A	A	A	A	A	G	G	A	A
19236447	rs16980394	G	G	G	G	A	A	A	A	G	G	G	G	A	A	A	A	A	A	G	G	G	G
19349615	rs16980396	T	T	T	T	C	C	C	C	T	T	C	C	C	C	C	C	C	C	T	T	C	C
19500107	rs9786357	G	G	G	G	T	T	T	T	G	G	G	G	T	T	T	T	T	T	G	G	T	T
21117888	rs9786197	C	C	C	C	T	T	T	T	T	T	T	T	T	T	T	T	T	T	C	C	T	T
21166358	rs9786232	G	G	G	G	T	T	T	T	T	T	T	T	T	T	T	T	T	T	G	G	T	T
21609946	rs3896	C	C	C	C	C	C	C	C	C	C	C	C	C	C	C	C	C	C	C	C	C	C
21618856	rs9786502	T	T	T	T	C	C	C	C	T	T	C	C	C	C	C	C	C	C	T	T	C	C
21717208	rs3848982	C	C	C	C	T	T	T	T	C	C	T	T	T	T	T	T	T	T	C	C	T	T
21722998	rs3901	T	T	T	T	T	T	T	T	T	T	T	T	T	T	T	T	T	T	T	T	T	T
21730647	rs3902	A	A	A	A	A	A	A	A	A	A	A	A	A	A	A	A	A	A	A	A	A	A
21751449	rs34289137	C	C	C	C	C	C	C	C	C	C	C	C	C	C	C	C	C	C	C	C	C	C
21865821	rs2032629	G	G	G	G	G	G	G	G	G	G	G	G	G	G	G	G	G	G	G	G	G	G
21866491	rs2032612	C	C	C	C	C	C	C	C	C	C	C	C	C	C	C	C	C	C	C	C	C	C
21872738	rs2032621	T	T	T	T	T	T	T	T	T	T	C	C	T	T	T	T	T	T	T	T	T	T
21881573	rs2032627	A	A	A	A	A	A	A	A	A	A	A	A	A	A	A	A	A	A	A	A	A	A
21892572	rs2032640	C	C	C	C	C	C	C	C	C	C	C	C	C	C	C	C	C	C	C	C	C	C
21894407	rs2032637	A	A	A	A	A	A	A	A	A	A	A	A	A	A	A	A	A	A	A	A	A	A
21896261	rs2032617	G	G	G	G	G	G	G	G	G	G	G	G	G	G	G	G	G	G	G	G	G	G
21904023	rs2032648	T	T	T	T	T	T	T	T	T	T	T	T	T	T	T	T	T	T	T	T	T	T
21905917	rs2032643	T	T	T	T	T	T	T	T	T	T	T	T	T	T	T	T	T	T	T	T	T	T
21906109	rs2032644	T	T	T	T	T	T	T	T	T	T	T	T	T	T	T	T	T	T	T	T	T	T
21917313	rs2032652	T	T	T	T	C	C	C	C	T	T	C	C	C	C	C	C	C	C	T	T	C	C
21931638	rs2032613	A	A	A	A	A	A	A	A	A	A	A	A	A	A	A	A	A	A	A	A	A	A
22214221	rs16980426	T	T	T	T	T	T	T	T	G	G	T	T	T	T	T	T	T	T	T	T	T	T
22665262	rs2196155	A	A	A	A	A	A	A	A	G	G	A	A	A	A	A	A	A	A	A	A	A	A
22737801	rs9341310	C	C	C	C	C	C	C	C	C	C	C	C	C	C	C	C	C	C	C	C	C	C
22738775	rs9341308	A	A	A	A	A	A	A	A	A	A	A	A	A	A	A	A	A	A	A	A	A	A
22749853	rs13447352	A	A	A	A	A	A	A	A	A	A	A	A	A	A	A	A	A	A	A	A	A	A
22750174	rs13447353	C	C	C	C	C	C	C	C	C	C	C	C	C	C	C	C	C	C	C	C	C	C
22750583	rs1558843	A	A	A	A	C	C	C	C	C	C	C	C	C	C	C	C	C	C	A	A	C	C
22750951	rs13447354	G	G	G	G	G	G	G	G	G	G	G	G	G	G	G	G	G	G	G	G	G	G
22750951	rs13447354	G	G	G	G	G	G	G	G	G	G	G	G	G	G	G	G	G	G	G	G	G	G
22750951	rs13447354	G	G	G	G	G	G	G	G	G	G	G	G	G	G	G	G	G	G	G	G	G	G
22750951	rs13447354	G	G	G	G	G	G	G	G	G	G	G	G	G	G	G	G	G	G	G	G	G	G
22918577	rs16980548	C	C	C	C	T	T	T	T	C	C	C	C	T	T	T	T	T	T	C	C	T	T
23443971	rs17842518	G	G	G	G	T	T	T	T	G	G	G	G	T	T	T	T	T	T	G	G	T	T
a HapMap allele
b Complete Genomics allele
