# Supplementary material for: A calibrated human Y-chromosomal phylogeny based on resequencing
Source: HighWire-hosted journal article supplement (doi:10.1101/gr.143198.112), 2012-10-04
Supplement: Supplemental_Table6_LiteratureConcordance.xlsx [file Supplemental_Table6_LiteratureConcordance.xlsx]

## Sheet: Sheet1
Table S6. Concordance between allele expected from the literature and observed genotypes
Error/Recurrent	Literature SNP marker	Literature Haplogroup	Haplogroup	Position(NCBI36)	Position(GRCh37)	Reference allele	Ancestral allele	NA21313	GS18940	GS19239	GS20510	GS21732	GS21737	GS19026	GS18504	GS19834	GS18501	GS19020	GS19025	GS19700	GS19703	GS19670	GS06994	GS20511	GS12891	GS18558	GS19735	GS20845	GS20846	GS20850	GS10851	GS20509	HG00731	GS07357	GS19649	GS12889(grandfather)	GS12877(father)	GS12882(son1)	GS12883(son2)	GS12884(son3)	GS12886(son4)	GS12888(son5)	GS12893(son6)	VarType	dbSNP ID	CpG	EntrezGene ID	symbol	mRNA_Acc
								MKK	JPT	YRI	TSI	MKK	MKK	LWK	YRI	ASW	YRI	LWK	LWK	ASW	ASW	MXL	CEU	TSI	CEU	CHB	MXL	GIH	GIH	GIH	CEU	TSI	PUR	CEU	MXL	CEU	CEU	CEU	CEU	CEU	CEU	CEU	CEU
								A3b2	D2a	E1a2	E1b1b1a2	E1b1b1a3	E1b1b1a3	E1b1a7a	E1b1a7a	E1b1a7a	E1b1a8a	E1b1a8a	E1b1a8a	E1b1a8a1	E1b1a8a1a	G2a3	I1	I1	I1	N	Q1a3a	R2	R1a1	R1a1	R1b1b	R1b1b	R1b1b2h	R1b1b2h	R1b1b2h	R1b1b	R1b1b	R1b1b	R1b1b	R1b1b	R1b1b	R1b1b	R1b1b
error	V67	A3	not variable	16154835	17645441	G	G	G	G	G	G	G	G	G	G	G	G	G	G	G	G	G	G	G	G	G	G	G	G	G	G	G	G	G	G	G	G	G	G	G	G	G	G	snp
error	P9.1/P9.2	CR/E1b1a7a1	not variable	13435843	14926449	A	del	A	A	A	A	A	A	A	A	A	A	A	A	A	A	A	A	A	A	A	A	A	A	A	A	A	A	A	A	A	A	A	A	A	A	A	A	snp			8287	USP9Y
error	P211	E1b1a	not variable	2723707	2663707	T	T	T	T	T	T	T	T	T	T	T	T	T	T	T	T	T	T	T	T	T	T	T	T	T	T	T	T	T	T	T	T	T	T	T	T	T	T	snp
error	M346	Q1a3	not variable	2947157	2887157	C	G	C	C	C	C	C	C	C	C	C	C	C	C	C	C	C	C	C	C	C	C	C	C	C	C	C	C	C	C	C	C	C	C	C	C	C	C	snp		CpG
error	V24	E	not variable	6981075	6921075	T	T	T	T	T	T	T	T	T	T	T	T	T	T	T	T	T	T	T	T	T	T	T	T	T	T	T	T	T	T	T	T	T	T	T	T	T	T	snp			90665	TBL1Y
error	DYS391p	E1b1	not variable	13122402	14612394	C	C	C	C	C	C	C	C	C	C	C	C	C	C	C	C	C	C	C	C	C	C	C	C	C	C	C	C	C	C	C	C	C	C	C	C	C	C	snp
error	M57	D2	not variable	20211305	21751917	T	T	T	T	T	T	T	T	T	T	T	T	T	T	T	T	T	T	T	T	T	T	T	T	T	T	T	T	T	T	T	T	T	T	T	T	T	T	snp				TXLNG2P
error	PK1	A2	A	20992895	22583507	C	C	A	C	C	C	C	C	C	C	C	C	C	C	C	C	C	C	C	C	C	C	C	C	C	C	C	C	C	C	C	C	C	C	C	C	C	C	snp		CpG
error	P100	A3b1	DR	20362081	21902693	C	T	T	C	C	C	C	C	C	C	C	C	C	C	C	C	C	C	C	C	C	C	C	C	C	C	C	C	C	C	C	C	C	C	C	C	C	C	snp			8284	KDM5D
error/recurrent	M91	A	I_2	20366926	21907538	T	T	T	T	T	T	T	T	T	T	T	T	T	T	T	T	T	T	del	T	T	T	T	T	T	T	T	T	T	T	T	T	T	T	T	T	T	T	del	rs2032651		8284	KDM5D	NM_004653.3
error/recurrent	M368	J1e1/R2	R2	2948632	2888632	A	A	A	A	A	A	A	A	A	A	A	A	A	A	A	A	A	A	A	A	A	A	T	A	A	A	A	A	A	A	A	A	A	A	A	A	A	A	snp
recurrent	P41.1/P41.2 =M359	D2/I2a1	D	13001679	14491671	T	C	T	C	T	T	T	T	T	T	T	T	T	T	T	T	T	T	T	T	T	T	T	T	T	T	T	T	T	T	T	T	T	T	T	T	T	T	snp		CpG		GYG2P1
recurrent	U175	E1b1a8	E1b1a8a	14763088	16253694	G	A	G	G	G	G	G	G	G	G	G	A	A	A	A	A	G	G	G	G	G	G	G	G	G	G	G	G	G	G	G	G	G	G	G	G	G	G	snp	rs16980588
recurrent	SRY10831.1/SRY10831.2	BR/R1a	R1a	2717176	2657176	C	T	T	C	C	C	C	C	C	C	C	C	C	C	C	C	C	C	C	C	C	C	C	T	T	C	C	C	C	C	C	C	C	C	C	C	C	C	snp	dbsnp.100:rs2534636		6736	SRY	NM_003140.1
recurrent	V218	A2	I	6722712	6662712	C	C	C	C	C	C	C	C	C	C	C	C	C	C	C	C	C	T	T	T	C	C	C	C	C	C	C	C	C	C	C	C	C	C	C	C	C	C	snp		CpG
	M139	BR	A	20165774	21706386	4C	4C	5C	4C	4C	4C	4C	4C	4C	4C	4C	4C	4C	4C	4C	4C	4C	4C	4C	4C	4C	4C	4C	4C	4C	4C	4C	4C	4C	4C	4C	4C	4C	4C	4C	4C	4C	4C	del
	V160	A3	A	6967838	6907838	G	G	A	G	G	G	G	G	G	G	G	G	G	G	G	G	G	G	G	G	G	G	G	G	G	G	G	G	G	G	G	G	G	G	G	G	G	G	snp		CpG	90665	TBL1Y
	M305	A3b2	A	21159562	22750174	C	C	T	C	C	C	C	C	C	C	C	C	C	C	C	C	C	C	C	C	C	C	C	C	C	C	C	C	C	C	C	C	C	C	C	C	C	C	snp	rs13447353		9086	EIF1AY
	M202	A3b2	A	13538886	15029492	T	T	G	T	T	T	T	T	T	T	T	T	T	T	T	T	T	T	T	T	T	T	T	T	T	T	T	T	T	T	T	T	T	T	T	T	T	T	snp	rs2032649		8653	DDX3Y
	V193	A3	A	2751796	2691796	G	G	A	G	G	G	G	G	G	G	G	G	G	G	G	G	G	G	G	G	G	G	G	G	G	G	G	G	G	G	G	G	G	G	G	G	G	G	snp
	V1	A3	A	6837077	6777077	T	T	C	T	T	T	T	T	T	T	T	T	T	T	T	T	T	T	T	T	T	T	T	T	T	T	T	T	T	T	T	T	T	T	T	T	T	T	snp
	V156	A3	A	6936484	6876484	G	G	T	G	G	G	G	G	G	G	G	G	G	G	G	G	G	G	G	G	G	G	G	G	G	G	G	G	G	G	G	G	G	G	G	G	G	G	snp			90665	TBL1Y
	V155	A3	A	6945631	6885631	G	G	A	G	G	G	G	G	G	G	G	G	G	G	G	G	G	G	G	G	G	G	G	G	G	G	G	G	G	G	G	G	G	G	G	G	G	G	snp		CpG	90665	TBL1Y
	V10	A3	A	6953093	6893093	A	A	C	A	A	A	A	A	A	A	A	A	A	A	A	A	A	A	A	A	A	A	A	A	A	A	A	A	A	A	A	A	A	A	A	A	A	A	snp			90665	TBL1Y
	V194	A3	A	13168132	14658122	G	G	A	G	G	G	G	G	G	G	G	G	G	G	G	G	G	G	G	G	G	G	G	G	G	G	G	G	G	G	G	G	G	G	G	G	G	G	snp		CpG
	M190	A3b	A	13477921	14968527	A	A	G	A	A	A	A	A	A	A	A	A	A	A	A	A	A	A	A	A	A	A	A	A	A	A	A	A	A	A	A	A	A	A	A	A	A	A	snp	rs2032603		8287	USP9Y
	M219	A3b2	A	13946309	15436915	T	T	C	T	T	T	T	T	T	T	T	T	T	T	T	T	T	T	T	T	T	T	T	T	T	T	T	T	T	T	T	T	T	T	T	T	T	T	snp	rs2032669		7404	UTY
	M220	A3b	A	13946444	15437050	A	A	G	A	A	A	A	A	A	A	A	A	A	A	A	A	A	A	A	A	A	A	A	A	A	A	A	A	A	A	A	A	A	A	A	A	A	A	snp	rs2032670		7404	UTY
	V51	A3	A	15975699	17466305	A	A	T	A	A	A	A	A	A	A	A	A	A	A	A	A	A	A	A	A	A	A	A	A	A	A	A	A	A	A	A	A	A	A	A	A	A	A	snp
	V66	A3	A	16153819	17644425	G	G	A	G	G	G	G	G	G	G	G	G	G	G	G	G	G	G	G	G	G	G	G	G	G	G	G	G	G	G	G	G	G	G	G	G	G	G	snp		CpG
	V56	A3	A	16432954	17923560	G	G	T	G	G	G	G	G	G	G	G	G	G	G	G	G	G	G	G	G	G	G	G	G	G	G	G	G	G	G	G	G	G	G	G	G	G	G	snp
	M13	A3b2	A	20181486	21722098	G	G	C	G	G	G	G	G	G	G	G	G	G	G	G	G	G	G	G	G	G	G	G	G	G	G	G	G	G	G	G	G	G	G	G	G	G	G	snp	rs3904
	M32	A3	A	20199824	21740436	T	T	C	T	T	T	T	T	T	T	T	T	T	T	T	T	T	T	T	T	T	T	T	T	T	T	T	T	T	T	T	T	T	T	T	T	T	T	snp				TXLNG2P
	M127	A3b2	A	20222661	21763273	G	G	T	G	G	G	G	G	G	G	G	G	G	G	G	G	G	G	G	G	G	G	G	G	G	G	G	G	G	G	G	G	G	G	G	G	G	G	snp
	M144	A3b	A	20384888	21925500	T	T	C	T	T	T	T	T	T	T	T	T	T	T	T	T	T	T	T	T	T	T	T	T	T	T	T	T	T	T	T	T	T	T	T	T	T	T	snp	rs2032619
	M168	CR	CR	13323385	14813991	T	C	C	T	T	T	T	T	T	T	T	T	T	T	T	T	T	T	T	T	T	T	T	T	T	T	T	T	T	T	T	T	T	T	T	T	T	T	snp	rs2032595	CpG	8287	USP9Y
	IMS-JST021355	D	D	2888425	2828425	A	A	A	G	A	A	A	A	A	A	A	A	A	A	A	A	A	A	A	A	A	A	A	A	A	A	A	A	A	A	A	A	A	A	A	A	A	A	snp	dbsnp.100:rs2267802		7544	ZFY	NM_001145276.1
	P37.1/P37.2	D2/I2a	D	13001692	14491684	T	T	T	C	T	T	T	T	T	T	T	T	T	T	T	T	T	T	T	T	T	T	T	T	T	T	T	T	T	T	T	T	T	T	T	T	T	T	snp				GYG2P1
	M179	D2	D	13348094	14838700	C	C	C	T	C	C	C	C	C	C	C	C	C	C	C	C	C	C	C	C	C	C	C	C	C	C	C	C	C	C	C	C	C	C	C	C	C	C	snp	dbsnp.94:rs2032596	CpG	8287	USP9Y	NM_004654.3
	M174	D	D	13463674	14954280	T	T	T	C	T	T	T	T	T	T	T	T	T	T	T	T	T	T	T	T	T	T	T	T	T	T	T	T	T	T	T	T	T	T	T	T	T	T	snp	dbsnp.94:rs2032602		8287	USP9Y	NM_004654.3
	P190	D2	D	16606643	18097249	A	A	A	GAC	A	A	A	A	A	A	A	A	A	A	A	A	A	A	A	A	A	A	A	A	A	A	A	A	A	A	A	A	A	A	A	A	A	A	sub
	M116.1/M116.2	D2a /E1b1a2	D	20224669	21765281	T	T	T	A	T	T	T	T	T	T	T	T	T	T	T	T	T	T	T	T	T	T	T	T	T	T	T	T	T	T	T	T	T	T	T	T	T	T	snp			84663	CYorf15B	NM_032576.4
	M55	D2	D	20332126	21872738	T	T	T	C	T	T	T	T	T	T	T	T	T	T	T	T	T	T	T	T	T	T	T	T	T	T	T	T	T	T	T	T	T	T	T	T	T	T	snp	dbsnp.94:rs2032621		8284	KDM5D	NM_004653.3
	M64.1/M64.2	D2/R1a1c	D	20362771	21903383	A	A	A	G	A	A	A	A	A	A	A	A	A	A	A	A	A	A	A	A	A	A	A	A	A	A	A	A	A	A	A	A	A	A	A	A	A	A	snp	dbsnp.94:rs2032626		8284	KDM5D	NM_004653.3
	P183	DE	DE	7392132	7332132	C	C	C	T	T	T	T	T	T	T	T	T	T	T	T	T	C	C	C	C	C	C	C	C	C	C	C	C	C	C	C	C	C	C	C	C	C	C	snp	rs16980749
	M203	DE	DE	14100931	15591537	G	G	G	C	C	C	C	C	C	C	C	C	C	C	C	C	G	G	G	G	G	G	G	G	G	G	G	G	G	G	G	G	G	G	G	G	G	G	snp	dbsnp.94:rs2032653		7404	UTY	NM_007125.3
	P144	DE	DE	15520850	17011456	G	G	G	A	A	A	A	A	A	A	A	A	A	A	A	A	G	G	G	G	G	G	G	G	G	G	G	G	G	G	G	G	G	G	G	G	G	G	snp	rs9786431
	P153	DE	DE	17070436	18561042	T	T	T	G	G	G	G	G	G	G	G	G	G	G	G	G	T	T	T	T	T	T	T	T	T	T	T	T	T	T	T	T	T	T	T	T	T	T	snp	rs9786479
	P165	DE	DE	17880310	19370916	G	G	G	A	A	A	A	A	A	A	A	A	A	A	A	A	G	G	G	G	G	G	G	G	G	G	G	G	G	G	G	G	G	G	G	G	G	G	snp	rs16980598
	M145=P205	DE	DE	20176596	21717208	C	C	C	T	T	T	T	T	T	T	T	T	T	T	T	T	C	C	C	C	C	C	C	C	C	C	C	C	C	C	C	C	C	C	C	C	C	C	snp	rs3848982	CpG
	M63	A3b2	DR	20330026	21870638	G	A	A	G	G	G	G	G	G	G	G	G	G	G	G	G	G	G	G	G	G	G	G	G	G	G	G	G	G	G	G	G	G	G	G	G	G	G	snp	rs2032625		8284	KDM5D
	V187	BT	DR	2816519	2756519	C	T	T	C	C	C	C	C	C	C	C	C	C	C	C	C	C	C	C	C	C	C	C	C	C	C	C	C	C	C	C	C	C	C	C	C	C	C	snp
	V189	CT	DR	2817670	2757670	T	C	C	T	T	T	T	T	T	T	T	T	T	T	T	T	T	T	T	T	T	T	T	T	T	T	T	T	T	T	T	T	T	T	T	T	T	T	snp
	V202	BT	DR	2850584	2790584	C	G	G	C	C	C	C	C	C	C	C	C	C	C	C	C	C	C	C	C	C	C	C	C	C	C	C	C	C	C	C	C	C	C	C	C	C	C	snp
	V216	BT	DR	2928656	2868656	T	A	A	T	T	T	T	T	T	T	T	T	T	T	T	T	T	T	T	T	T	T	T	T	T	T	T	T	T	T	T	T	T	T	T	T	T	T	snp
	V21	BT	DR	6919691	6859691	T	C	C	T	T	T	T	T	T	T	T	T	T	T	T	T	T	T	T	T	T	T	T	T	T	T	T	T	T	T	T	T	T	T	T	T	T	T	snp			90665	TBL1Y
	V9	CT	DR	6924267	6864267	G	A	A	G	G	G	G	G	G	G	G	G	G	G	G	G	G	G	G	G	G	G	G	G	G	G	G	G	G	G	G	G	G	G	G	G	G	G	snp			90665	TBL1Y
	V29	BT	DR	6968261	6908261	G	A	A	G	G	G	G	G	G	G	G	G	G	G	G	G	G	G	G	G	G	G	G	G	G	G	G	G	G	G	G	G	G	G	G	G	G	G	snp			90665	TBL1Y
	V31	BT	DR	6992831	6932831	A	G	G	A	A	A	A	A	A	A	A	A	A	A	A	A	A	A	A	A	A	A	A	A	A	A	A	A	A	A	A	A	A	A	A	A	A	A	snp			90665	TBL1Y
	P97	A	DR	13395667	14886273	T	G	G	T	T	T	T	T	T	T	T	T	T	T	T	T	T	T	T	T	T	T	T	T	T	T	T	T	T	T	T	T	T	T	T	T	T	T	snp			8287	USP9Y
	V41	CT	DR	14940351	16430957	A	G	G	A	A	A	A	A	A	A	A	A	A	A	A	A	A	A	A	A	A	A	A	A	A	A	A	A	A	A	A	A	A	A	A	A	A	A	snp		CpG
	V59	BT	DR	15547373	17037979	T	C	C	T	T	T	T	T	T	T	T	T	T	T	T	T	T	T	T	T	T	T	T	T	T	T	T	T	T	T	T	T	T	T	T	T	T	T	snp
	V64	BT	DR	15796788	17287394	A	T	T	A	A	A	A	A	A	A	A	A	A	A	A	A	A	A	A	A	A	A	A	A	A	A	A	A	A	A	A	A	A	A	A	A	A	A	snp
	V52	CT	DR	16024421	17515027	A	G	G	A	A	A	A	A	A	A	A	A	A	A	A	A	A	A	A	A	A	A	A	A	A	A	A	A	A	A	A	A	A	A	A	A	A	A	snp
	V54	CT	DR	16362772	17853378	T	C	C	T	T	T	T	T	T	T	T	T	T	T	T	T	T	T	T	T	T	T	T	T	T	T	T	T	T	T	T	T	T	T	T	T	T	T	snp
	V55	CT	DR	16430267	17920873	T	C	C	T	T	T	T	T	T	T	T	T	T	T	T	T	T	T	T	T	T	T	T	T	T	T	T	T	T	T	T	T	T	T	T	T	T	T	snp		CpG
	M42	BR	DR	20326228	21866840	T	A	A	T	T	T	T	T	T	T	T	T	T	T	T	T	T	T	T	T	T	T	T	T	T	T	T	T	T	T	T	T	T	T	T	T	T	T	snp	rs2032630		8284	KDM5D
	M94	BR	DR	20397546	21938158	A	C	C	A	A	A	A	A	A	A	A	A	A	A	A	A	A	A	A	A	A	A	A	A	A	A	A	A	A	A	A	A	A	A	A	A	A	A	snp	rs2032647
	M294	CR	DR	21154333	22744945	T	C	C	T	T	T	T	T	T	T	T	T	T	T	T	T	T	T	T	T	T	T	T	T	T	T	T	T	T	T	T	T	T	T	T	T	T	T	snp	rs9341317	CpG	9086	EIF1AY
	M299	BR	DR	21157894	22748506	G	T	T	G	G	G	G	G	G	G	G	G	G	G	G	G	G	G	G	G	G	G	G	G	G	G	G	G	G	G	G	G	G	G	G	G	G	G	snp	rs13447347		9086	EIF1AY
	SRY4064=M40=P20	E	E	2723943	2663943	C	C	C	C	T	T	T	T	T	T	T	T	T	T	T	T	C	C	C	C	C	C	C	C	C	C	C	C	C	C	C	C	C	C	C	C	C	C	snp	rs9786608	CpG
	P172	E	E	7025215	6965215	C	C	C	C	T	T	T	T	T	T	T	T	T	T	T	T	C	C	C	C	C	C	C	C	C	C	C	C	C	C	C	C	C	C	C	C	C	C	snp	rs16981311
	P173	E	E	7055523	6995523	A	A	A	A	G	G	G	G	G	G	G	G	G	G	G	G	A	A	A	A	A	A	A	A	A	A	A	A	A	A	A	A	A	A	A	A	A	A	snp	rs16981308
	P152	E	E	13174651	14664631	G	G	G	G	C	C	C	C	C	C	C	C	C	C	C	C	G	G	G	G	G	G	G	G	G	G	G	G	G	G	G	G	G	G	G	G	G	G	snp	rs9786634
	P175	E	E	13313471	14804077	G	G	G	G	A	A	A	A	A	A	A	A	A	A	A	A	G	G	G	G	G	G	G	G	G	G	G	G	G	G	G	G	G	G	G	G	G	G	snp	dbsnp.119:rs9786191	CpG	64595	TTTY15	NR_001545.2
	P170	E	E	13530916	15021522	G	G	G	G	A	A	A	A	A	A	A	A	A	A	A	A	G	G	G	G	G	G	G	G	G	G	G	G	G	G	G	G	G	G	G	G	G	G	snp	dbsnp.119:rs9786025		8653	DDX3Y	NM_001122665.1
	P174	E	E	14318720	15809326	G	G	G	G	A	A	A	A	A	A	A	A	A	A	A	A	G	G	G	G	G	G	G	G	G	G	G	G	G	G	G	G	G	G	G	G	G	G	snp	rs16980360
	P176	E	E	14444918	15935524	T	T	T	T	G	G	G	G	G	G	G	G	G	G	G	G	T	T	T	T	T	T	T	T	T	T	T	T	T	T	T	T	T	T	T	T	T	T	snp	rs7067279
	P155	E	E	14847931	16338537	G	G	G	G	A	A	A	A	A	A	A	A	A	A	A	A	G	G	G	G	G	G	G	G	G	G	G	G	G	G	G	G	G	G	G	G	G	G	snp	rs9786301
	P150	E	E	15355833	16846439	C	C	C	C	A	A	A	A	A	A	A	A	A	A	A	A	C	C	C	C	C	C	C	C	C	C	C	C	C	C	C	C	C	C	C	C	C	C	snp	dbsnp.119:rs9786893		22829	NLGN4Y	NM_014893.3
	P156	E	E	15929411	17420017	A	A	A	A	G	G	G	G	G	G	G	G	G	G	G	G	A	A	A	A	A	A	A	A	A	A	A	A	A	A	A	A	A	A	A	A	A	A	snp	rs9786126
	P154	E	E	18009501	19500107	G	G	G	G	T	T	T	T	T	T	T	T	T	T	T	T	G	G	G	G	G	G	G	G	G	G	G	G	G	G	G	G	G	G	G	G	G	G	snp	rs9786357
	P147	E1	E	19542808	21083420	T	T	T	T	A	A	A	A	A	A	A	A	A	A	A	A	T	T	T	T	T	T	T	T	T	T	T	T	T	T	T	T	T	T	T	T	T	T	snp	rs16980577
	P168	E	E	20077971	21618583	G	G	G	G	C	C	C	C	C	C	C	C	C	C	C	C	G	G	G	G	G	G	G	G	G	G	G	G	G	G	G	G	G	G	G	G	G	G	snp	dbsnp.123:rs16980574		286554	BCORL2	NR_002923.2
	M96	E	E	20238386	21778998	C	C	C	C	G	G	G	G	G	G	G	G	G	G	G	G	C	C	C	C	C	C	C	C	C	C	C	C	C	C	C	C	C	C	C	C	C	C	snp	rs9306841
	P169	E	E	21327965	22918577	C	C	C	C	T	T	T	T	T	T	T	T	T	T	T	T	C	C	C	C	C	C	C	C	C	C	C	C	C	C	C	C	C	C	C	C	C	C	snp	dbsnp.123:rs16980548		140032	RPS4Y2	NM_001039567.2
	P171	E	E	21853359	23443971	G	G	G	G	T	T	T	T	T	T	T	T	T	T	T	T	G	G	G	G	G	G	G	G	G	G	G	G	G	G	G	G	G	G	G	G	G	G	snp	rs17842518
	P110	E1a2	E1a	13935117	15425723	C	C	C	C	T	C	C	C	C	C	C	C	C	C	C	C	C	C	C	C	C	C	C	C	C	C	C	C	C	C	C	C	C	C	C	C	C	C	snp			7404	UTY	NM_007125.3
	M33	E1a	E1a	20199838	21740450	A	A	A	A	C	A	A	A	A	A	A	A	A	A	A	A	A	A	A	A	A	A	A	A	A	A	A	A	A	A	A	A	A	A	A	A	A	A	snp				TXLNG2P	NM_001005852.2
	M132	E1a	E1a	20355649	21896261	G	G	G	G	T	G	G	G	G	G	G	G	G	G	G	G	G	G	G	G	G	G	G	G	G	G	G	G	G	G	G	G	G	G	G	G	G	G	snp	dbsnp.94:rs2032617		8284	KDM5D	NM_001146705.1
	P179	E1b1	E1b	12570308	14060308	A	A	A	A	A	C	C	C	C	C	C	C	C	C	C	C	A	A	A	A	A	A	A	A	A	A	A	A	A	A	A	A	A	A	A	A	A	A	snp	rs16980621
	P177	E1b	E1b	12669846	14159846	C	C	C	C	C	T	T	T	T	T	T	T	T	T	T	T	C	C	C	C	C	C	C	C	C	C	C	C	C	C	C	C	C	C	C	C	C	C	snp	rs16980473
	P181	E1b1	E1b	15903505	17394111	C	C	C	C	C	G	G	G	G	G	G	G	G	G	G	G	C	C	C	C	C	C	C	C	C	C	C	C	C	C	C	C	C	C	C	C	C	C	snp	rs9785940
	P180	E1b1	E1b	17110668	18601274	G	G	G	G	G	A	A	A	A	A	A	A	A	A	A	A	G	G	G	G	G	G	G	G	G	G	G	G	G	G	G	G	G	G	G	G	G	G	snp	rs 9786035
	P2	E1b1	E1b	20070219	21610831	G	G	G	G	G	A	A	A	A	A	A	A	A	A	A	A	G	G	G	G	G	G	G	G	G	G	G	G	G	G	G	G	G	G	G	G	G	G	snp
	M2=SY81	E1b1a	E1b1a	12606577	14096577	A	A	A	A	A	A	A	A	G	G	G	G	G	G	G	G	A	A	A	A	A	A	A	A	A	A	A	A	A	A	A	A	A	A	A	A	A	A	snp	rs3893
	V38 Ê	E1b1a	E1b1a	6878291	6818291	C	C	C	C	C	C	C	C	T	T	T	T	T	T	T	T	C	C	C	C	C	C	C	C	C	C	C	C	C	C	C	C	C	C	C	C	C	C	snp	dbsnp.86:rs768983	CpG	90665	TBL1Y	NM_033284.1
	P189	E1b1a	E1b1a	12707977	14197977	G	G	G	G	G	G	G	G	A	A	A	A	A	A	A	A	G	G	G	G	G	G	G	G	G	G	G	G	G	G	G	G	G	G	G	G	G	G	snp	rs9786819	CpG
	M180=P88	E1b1a	E1b1a	13359735	14850341	T	T	T	T	T	T	T	T	C	C	C	C	C	C	C	C	T	T	T	T	T	T	T	T	T	T	T	T	T	T	T	T	T	T	T	T	T	T	snp	dbsnp.94:rs2032598		8287	USP9Y	NM_004654.3
	V43	E1b1a	E1b1a	15201216	16691822	G	G	G	G	G	G	G	G	T	T	T	T	T	T	T	T	G	G	G	G	G	G	G	G	G	G	G	G	G	G	G	G	G	G	G	G	G	G	snp	dbsnp.130:rs73621792		22829	NLGN4Y	NM_014893.3
	P182	E1b1a	E1b1a	17745841	19236447	G	G	G	G	G	G	G	G	A	A	A	A	A	A	A	A	G	G	G	G	G	G	G	G	G	G	G	G	G	G	G	G	G	G	G	G	G	G	snp	rs16980394
	P1	E1b1a	E1b1a	20071555	21612167	G	G	G	G	G	G	G	G	A	A	A	A	A	A	A	A	G	G	G	G	G	G	G	G	G	G	G	G	G	G	G	G	G	G	G	G	G	G	snp
	P46	E1b1a	E1b1a	20340240	21880852	C	C	C	C	C	C	C	C	T	T	T	T	T	T	T	T	C	C	C	C	C	C	C	C	C	C	C	C	C	C	C	C	C	C	C	C	C	C	snp			8284	KDM5D	NM_004653.3
	M191=P86	E1b1a7	E1b1a7a	13529007	15019613	T	T	T	T	T	T	T	T	G	G	G	T	T	T	T	T	T	T	T	T	T	T	T	T	T	T	T	T	T	T	T	T	T	T	T	T	T	T	snp	dbsnp.94:rs2032590		8653	DDX3Y	NM_001122665.1
	U174=P252	E1b1a7a	E1b1a7a	14760751	16251357	G	G	G	G	G	G	G	G	A	A	A	G	G	G	G	G	G	G	G	G	G	G	G	G	G	G	G	G	G	G	G	G	G	G	G	G	G	G	snp	rs16980586
	U186	E1b1a7	E1b1a7a	14987946	16478552	A	A	A	A	A	A	A	A	G	G	G	A	A	A	A	A	A	A	A	A	A	A	A	A	A	A	A	A	A	A	A	A	A	A	A	A	A	A	snp	rs16980370
	U247=P253	E1b1a7	E1b1a7a	17348769	18839375	C	C	C	C	C	C	C	C	T	T	T	C	C	C	C	C	C	C	C	C	C	C	C	C	C	C	C	C	C	C	C	C	C	C	C	C	C	C	snp	rs2068150
	P277	E1b1a8a	E1b1a8a	14088609	15579215	A	A	A	A	A	A	A	A	A	A	A	G	G	G	G	G	A	A	A	A	A	A	A	A	A	A	A	A	A	A	A	A	A	A	A	A	A	A	snp	dbsnp.123:rs16980558		7404	UTY	NM_007125.3
	U209	E1b1a8a	E1b1a8a	15804352	17294958	C	C	C	C	C	C	C	C	C	C	C	T	T	T	T	T	C	C	C	C	C	C	C	C	C	C	C	C	C	C	C	C	C	C	C	C	C	C	snp	rs16980502
	U290	E1b1a8a1	E1b1a8a_4&5	20105446	21646058	T	T	T	T	T	T	T	T	T	T	T	T	T	T	A	A	T	T	T	T	T	T	T	T	T	T	T	T	T	T	T	T	T	T	T	T	T	T	snp	dbsnp.123:rs16980406		286554	BCORL2	NR_002923.2
	U181	E1b1a8a1a	E1b1a8a_5	14883820	16374426	C	C	C	C	C	C	C	C	C	C	C	C	C	C	C	T	C	C	C	C	C	C	C	C	C	C	C	C	C	C	C	C	C	C	C	C	C	C	snp	rs16980589
	M215	E1b1b	E1b1b	13977218	15467824	A	A	A	A	A	G	G	G	A	A	A	A	A	A	A	A	A	A	A	A	A	A	A	A	A	A	A	A	A	A	A	A	A	A	A	A	A	A	snp	dbsnp.94:rs2032654		7404	UTY	NM_007125.3
	V68	E1b1b1a	E1b1b	16174165	17664771	A	A	A	A	A	C	C	C	A	A	A	A	A	A	A	A	A	A	A	A	A	A	A	A	A	A	A	A	A	A	A	A	A	A	A	A	A	A	snp
	M35	E1b1b1	E1b1b	20201091	21741703	G	G	G	G	G	C	C	C	G	G	G	G	G	G	G	G	G	G	G	G	G	G	G	G	G	G	G	G	G	G	G	G	G	G	G	G	G	G	snp			246126	CYorf15A/TXLNG2P	NM_001005852.2
	M78	E1b1b1a	E1b1b	20352691	21893303	C	C	C	C	C	T	T	T	C	C	C	C	C	C	C	C	C	C	C	C	C	C	C	C	C	C	C	C	C	C	C	C	C	C	C	C	C	C	snp		CpG	8284	KDM5D	NM_004653.3
	V36	E1b1b1a2	E1b1b1a2	6874246	6814246	T	T	T	T	T	C	T	T	T	T	T	T	T	T	T	T	T	T	T	T	T	T	T	T	T	T	T	T	T	T	T	T	T	T	T	T	T	T	snp			90665	TBL1Y	NM_033284.1
	V13	E1b1b1a2	E1b1b1a2	6902263	6842263	G	G	G	G	G	A	G	G	G	G	G	G	G	G	G	G	G	G	G	G	G	G	G	G	G	G	G	G	G	G	G	G	G	G	G	G	G	G	snp		CpG	90665	TBL1Y	NM_033284.1
	V22	E1b1b1a3	E1b1b1a3	6919957	6859957	T	T	T	T	T	T	C	C	T	T	T	T	T	T	T	T	T	T	T	T	T	T	T	T	T	T	T	T	T	T	T	T	T	T	T	T	T	T	snp			90665	TBL1Y	NM_033284.1
	U17	G	G	2906401	2846401	C	A	C	C	C	C	C	C	C	C	C	C	C	C	C	C	T	C	C	C	C	C	C	C	C	C	C	C	C	C	C	C	C	C	C	C	C	C	snp	dbsnp.126:rs34742138		7544	ZFY	NM_001145276.1
	U23	G	G	12933864	14423856	A	G	G	G	G	G	G	G	G	G	G	G	G	G	G	G	A	G	G	G	G	G	G	G	G	G	G	G	G	G	G	G	G	G	G	G	G	G	snp		CpG
	P257/U6	G	G	12942936	14432928	A	G	G	G	G	G	G	G	G	G	G	G	G	G	G	G	A	G	G	G	G	G	G	G	G	G	G	G	G	G	G	G	G	G	G	G	G	G	snp	rs2740980
	U2	G	G	13087185	14577177	A	G	G	G	G	G	G	G	G	G	G	G	G	G	G	G	A	G	G	G	G	G	G	G	G	G	G	G	G	G	G	G	G	G	G	G	G	G	snp
	U12	G	G	13149436	14639427	C	A	A	A	A	A	A	A	A	A	A	A	A	A	A	A	C	A	A	A	A	A	A	A	A	A	A	A	A	A	A	A	A	A	A	A	A	A	snp
	U8	G2a3	G	13202247	14692227	C	T	T	T	T	T	T	T	T	T	T	T	T	T	T	T	C	T	T	T	T	T	T	T	T	T	T	T	T	T	T	T	T	T	T	T	T	T	snp
	U3	G	G	13502752	14993358	G	A	A	A	A	A	A	A	A	A	A	A	A	A	A	A	G	A	A	A	A	A	A	A	A	A	A	A	A	A	A	A	A	A	A	A	A	A	snp
	M201	G	G	13536923	15027529	T	G	G	G	G	G	G	G	G	G	G	G	G	G	G	G	T	G	G	G	G	G	G	G	G	G	G	G	G	G	G	G	G	G	G	G	G	G	snp	dbsnp.94:rs2032636		8653	DDX3Y	NM_001122665.1
	U7	G	G	13595577	15086183	C	G	G	G	G	G	G	G	G	G	G	G	G	G	G	G	C	G	G	G	G	G	G	G	G	G	G	G	G	G	G	G	G	G	G	G	G	G	snp
	U33	G	G	13784594	15275200	G	C	C	C	C	C	C	C	C	C	C	C	C	C	C	C	G	C	C	C	C	C	C	C	C	C	C	C	C	C	C	C	C	C	C	C	C	C	snp
	P287	G2	G	20531485	22072097	G	G	G	G	G	G	G	G	G	G	G	G	G	G	G	G	T	G	G	G	G	G	G	G	G	G	G	G	G	G	G	G	G	G	G	G	G	G	snp	rs4116820
	P15	G2a	G	21653414	23244026	C	C	C	C	C	C	C	C	C	C	C	C	C	C	C	C	T	C	C	C	C	C	C	C	C	C	C	C	C	C	C	C	C	C	C	C	C	C	snp
	V186	F	GR	2816471	2756471	T	A	A	A	A	A	A	A	A	A	A	A	A	A	A	A	T	T	T	T	T	T	T	T	T	T	T	T	T	T	T	T	T	T	T	T	T	T	snp
	V205	F	GR	2923665	2863665	G	A	A	A	A	A	A	A	A	A	A	A	A	A	A	A	G	G	G	G	G	G	G	G	G	G	G	G	G	G	G	G	G	G	G	G	G	G	snp	dbsnp.116:rs7892924		100506003	LOC100506003	XR_109785.1
	P143	CF	GR	12707867	14197867	A	G	G	G	G	G	G	G	G	G	G	G	G	G	G	G	A	A	A	A	A	A	A	A	A	A	A	A	A	A	A	A	A	A	A	A	A	A	snp	rs4141886
	P141	F-R	GR	7001218	6941218	A	G	G	G	G	G	G	G	G	G	G	G	G	G	G	G	A	A	A	A	A	A	A	A	A	A	A	A	A	A	A	A	A	A	A	A	A	A	snp	dbsnp.119:rs9306845	CpG	90665	TBL1Y	NM_033284.1
	P142	F-R	GR	7278079	7218079	A	G	G	G	G	G	G	G	G	G	G	G	G	G	G	G	A	A	A	A	A	A	A	A	A	A	A	A	A	A	A	A	A	A	A	A	A	A	snp	dbsnp.113:rs4988808	CpG	5616	PRKY	NM_002760.3
	P134	F-R	GR	7455806	7395806	G	C	C	C	C	C	C	C	C	C	C	C	C	C	C	C	G	G	G	G	G	G	G	G	G	G	G	G	G	G	G	G	G	G	G	G	G	G	snp	rs9786877
	P138	F-R	GR	12709284	14199284	C	T	T	T	T	T	T	T	T	T	T	T	T	T	T	T	C	C	C	C	C	C	C	C	C	C	C	C	C	C	C	C	C	C	C	C	C	C	snp	rs16980478
	M213=P137	F-R	GR	14036145	15526751	C	T	T	T	T	T	T	T	T	T	T	T	T	T	T	T	C	C	C	C	C	C	C	C	C	C	C	C	C	C	C	C	C	C	C	C	C	C	snp	dbsnp.94:rs2032665		7404	UTY	NM_007125.3
	P163	F-R	GR	14751710	16242316	T	A	A	A	A	A	A	A	A	A	A	A	A	A	A	A	T	T	T	T	T	T	T	T	T	T	T	T	T	T	T	T	T	T	T	T	T	T	snp	rs4589047
	P166	F-R	GR	15765412	17256018	T	C	C	C	C	C	C	C	C	C	C	C	C	C	C	C	T	T	T	T	T	T	T	T	T	T	T	T	T	T	T	T	T	T	T	T	T	T	snp	rs16980499
	P140	F-R	GR	15821369	17311975	C	G	G	G	G	G	G	G	G	G	G	G	G	G	G	G	C	C	C	C	C	C	C	C	C	C	C	C	C	C	C	C	C	C	C	C	C	C	snp	rs9786636
	P14	F-R	GR	15907992	17398598	T	C	C	C	C	C	C	C	C	C	C	C	C	C	C	C	T	T	T	T	T	T	T	T	T	T	T	T	T	T	T	T	T	T	T	T	T	T	snp
	P158	F-R	GR	16002907	17493513	T	C	C	C	C	C	C	C	C	C	C	C	C	C	C	C	T	T	T	T	T	T	T	T	T	T	T	T	T	T	T	T	T	T	T	T	T	T	snp	rs9785913
	P159	F-R	GR	16606645	18097251	A	C	C	C	C	C	C	C	C	C	C	C	C	C	C	C	A	A	A	A	A	A	A	A	A	A	A	A	A	A	A	A	A	A	A	A	A	A	snp	rs9785905	CpG
	P161	F-R	GR	16687485	18178091	A	G	G	G	G	G	G	G	G	G	G	G	G	G	G	G	A	A	A	A	A	A	A	A	A	A	A	A	A	A	A	A	A	A	A	A	A	A	snp	rs16980495	CpG
	P149	F-R	GR	17087870	18578476	A	G	G	G	G	G	G	G	G	G	G	G	G	G	G	G	A	A	A	A	A	A	A	A	A	A	A	A	A	A	A	A	A	A	A	A	A	A	snp	rs16980391
	P148	F-R	GR	17859009	19349615	T	C	C	C	C	C	C	C	C	C	C	C	C	C	C	C	T	T	T	T	T	T	T	T	T	T	T	T	T	T	T	T	T	T	T	T	T	T	snp	rs16980396
	P135	F-R	GR	20078244	21618856	T	C	C	C	C	C	C	C	C	C	C	C	C	C	C	C	T	T	T	T	T	T	T	T	T	T	T	T	T	T	T	T	T	T	T	T	T	T	snp	dbsnp.119:rs9786502		286554	BCORL2	NR_002923.2
	M89	F-R	GR	20376701	21917313	T	C	C	C	C	C	C	C	C	C	C	C	C	C	C	C	T	T	T	T	T	T	T	T	T	T	T	T	T	T	T	T	T	T	T	T	T	T	snp	rs2032652
	P136	F-R	GR	21450035	23040647	G	T	T	T	T	T	T	T	T	T	T	T	T	T	T	T	G	G	G	G	G	G	G	G	G	G	G	G	G	G	G	G	G	G	G	G	G	G	snp	rs9785908
	P125=M429	IJ	I	12541334	14031334	T	T	T	T	T	T	T	T	T	T	T	T	T	T	T	T	T	A	A	A	T	T	T	T	T	T	T	T	T	T	T	T	T	T	T	T	T	T	snp	rs17306671
	P129	IJ	I	12654593	14144593	A	A	A	A	A	A	A	A	A	A	A	A	A	A	A	A	A	G	G	G	A	A	A	A	A	A	A	A	A	A	A	A	A	A	A	A	A	A	snp	rs17306699
	P38	I	I	12994387	14484379	A	A	A	A	A	A	A	A	A	A	A	A	A	A	A	A	A	C	C	C	A	A	A	A	A	A	A	A	A	A	A	A	A	A	A	A	A	A	snp				GYG2P1
	P40	I1	I	12994402	14484394	C	C	C	C	C	C	C	C	C	C	C	C	C	C	C	C	C	T	T	T	C	C	C	C	C	C	C	C	C	C	C	C	C	C	C	C	C	C	snp				GYG2P1
	P30	I1	I	13006761	14496753	G	G	G	G	G	G	G	G	G	G	G	G	G	G	G	G	G	A	A	A	G	G	G	G	G	G	G	G	G	G	G	G	G	G	G	G	G	G	snp				GYG2P1
	M170	I	I	13357186	14847792	A	A	A	A	A	A	A	A	A	A	A	A	A	A	A	A	A	C	C	C	A	A	A	A	A	A	A	A	A	A	A	A	A	A	A	A	A	A	snp	dbsnp.94:rs2032597		8287	USP9Y	NM_004654.3
	M253	I1	I	13532101	15022707	C	C	C	C	C	C	C	C	C	C	C	C	C	C	C	C	C	T	T	T	C	C	C	C	C	C	C	C	C	C	C	C	C	C	C	C	C	C	snp	dbsnp.119:rs9341296		8653	DDX3Y	NM_001122665.1
	M258	I	I	13532758	15023364	T	T	T	T	T	T	T	T	T	T	T	T	T	T	T	T	T	C	C	C	T	T	T	T	T	T	T	T	T	T	T	T	T	T	T	T	T	T	snp	dbsnp.119:rs9341301		8653	DDX3Y	NM_001122665.1
	U179	I	I	14864102	16354708	G	G	G	G	G	G	G	G	G	G	G	G	G	G	G	G	G	A	A	A	G	G	G	G	G	G	G	G	G	G	G	G	G	G	G	G	G	G	snp	rs2319818
	P124	IJ	I	17547696	19038302	A	A	A	A	A	A	A	A	A	A	A	A	A	A	A	A	A	C	C	C	A	A	A	A	A	A	A	A	A	A	A	A	A	A	A	A	A	A	snp	rs17315772
	P123	IJ	I	17676255	19166861	T	T	T	T	T	T	T	T	T	T	T	T	T	T	T	T	T	C	C	C	T	T	T	T	T	T	T	T	T	T	T	T	T	T	T	T	T	T	snp	rs17315821
	P126	IJ	I	19685158	21225770	C	C	C	C	C	C	C	C	C	C	C	C	C	C	C	C	C	G	G	G	C	C	C	C	C	C	C	C	C	C	C	C	C	C	C	C	C	C	snp	dbsnp.123:rs17250163		83869	TTTY14	NR_001543.1
	M307/P203	I1/O1a1	I	21160339	22750951	G	G	G	G	G	G	G	G	G	G	G	G	G	G	G	G	G	A	A	A	G	G	G	G	G	G	G	G	G	G	G	G	G	G	G	G	G	G	snp	dbsnp.121:rs13447354		9086	EIF1AY	NM_004681.2
	M522	I-K	IR	7233143	7173143	A	G	G	G	G	G	G	G	G	G	G	G	G	G	G	G	G	A	A	A	A	A	A	A	A	A	A	A	A	A	A	A	A	A	A	A	A	A	snp	dbsnp.119:rs9786714		5616	PRKY	NM_002760.3
	M523	I-K	IR	6813519	6753519	G	del	A	A	A	A	A	A	A	A	A	A	A	A	A	A	A	G	G	G	G	G	G	G	G	G	G	G	G	G	G	G	G	G	G	G	G	G	snp	dbsnp.135:rs9786139
	M231	N	N	13979118	15469724	G	G	G	G	G	G	G	G	G	G	G	G	G	G	G	G	G	G	G	G	A	G	G	G	G	G	G	G	G	G	G	G	G	G	G	G	G	G	snp	dbsnp.119:rs9341278	CpG	7404	UTY	NM_007125.3
	M214	NO	N	13981319	15471925	T	T	T	T	T	T	T	T	T	T	T	T	T	T	T	T	T	T	T	T	C	T	T	T	T	T	T	T	T	T	T	T	T	T	T	T	T	T	snp	dbsnp.94:rs2032674		7404	UTY	NM_007125.3
	P194	NO	N	14712374	16202980	C	C	C	C	C	C	C	C	C	C	C	C	C	C	C	C	C	C	C	C	G	C	C	C	C	C	C	C	C	C	C	C	C	C	C	C	C	C	snp	rs16980363
	P193	NO	N	20673609	22214221	T	T	T	T	T	T	T	T	T	T	T	T	T	T	T	T	T	T	T	T	G	T	T	T	T	T	T	T	T	T	T	T	T	T	T	T	T	T	snp	rs16980426
	P195	NO	N	21074650	22665262	A	A	A	A	A	A	A	A	A	A	A	A	A	A	A	A	A	A	A	A	G	A	A	A	A	A	A	A	A	A	A	A	A	A	A	A	A	A	snp	dbsnp.96:rs2196155			TTTY10	NR_001542.1
	P131	K-R	NR	13982257	15472863	T	C	C	C	C	C	C	C	C	C	C	C	C	C	C	C	C	C	C	C	T	T	T	T	T	T	T	T	T	T	T	T	T	T	T	T	T	T	snp	dbsnp.119:rs9786043		7404	UTY	NM_007125.3
	M9	K-R	NR	20189645	21730257	G	C	C	C	C	C	C	C	C	C	C	C	C	C	C	C	C	C	C	C	G	G	G	G	G	G	G	G	G	G	G	G	G	G	G	G	G	G	snp	dbsnp.36:rs3900		246126	CYorf15A/TXLNG2P	NM_001005852.2
	P36.1/P36.2	A2/Q1	Q	13006449	14496441	G	G	G	G	G	G	G	G	G	G	G	G	G	G	G	G	G	G	G	G	G	T	G	G	G	G	G	G	G	G	G	G	G	G	G	G	G	G	snp				GYG2P1
	M242	Q	Q	13527976	15018582	C	C	C	C	C	C	C	C	C	C	C	C	C	C	C	C	C	C	C	C	C	T	C	C	C	C	C	C	C	C	C	C	C	C	C	C	C	C	snp	dbsnp.117:rs8179021		8653	DDX3Y	NM_001122665.1
	M3	Q1a3a	Q	17605757	19096363	G	G	G	G	G	G	G	G	G	G	G	G	G	G	G	G	G	G	G	G	G	A	G	G	G	G	G	G	G	G	G	G	G	G	G	G	G	G	snp	rs3894
	P244	P	QR	12943108	14433100	G	G	G	G	G	G	G	G	G	G	G	G	G	G	G	G	G	G	G	G	G	A	A	A	A	A	A	A	A	A	A	A	A	A	A	A	A	A	snp	rs2740981	CpG
	P240	P	QR	13108816	14598808	T	T	T	T	T	T	T	T	T	T	T	T	T	T	T	T	T	T	T	T	T	C	C	C	C	C	C	C	C	C	C	C	C	C	C	C	C	C	snp	rs6530605
	P69	P	QR	13435814	14926420	G	G	G	G	G	G	G	G	G	G	G	G	G	G	G	G	G	G	G	G	G	A	A	A	A	A	A	A	A	A	A	A	A	A	A	A	A	A	snp	dbsnp.116:rs7892898		8287	USP9Y	NM_004654.3
	P230	P	QR	15979506	17470112	A	G	G	G	G	G	G	G	G	G	G	G	G	G	G	G	G	G	G	G	G	A	A	A	A	A	A	A	A	A	A	A	A	A	A	A	A	A	snp	rs9786781
	P228	P	QR	16017731	17508337	T	C	C	C	C	C	C	C	C	C	C	C	C	C	C	C	C	C	C	C	C	T	T	T	T	T	T	T	T	T	T	T	T	T	T	T	T	T	snp	rs17222419
	P239	P	QR	16390624	17881230	C	G	G	G	G	G	G	G	G	G	G	G	G	G	G	G	G	G	G	G	G	C	C	C	C	C	C	C	C	C	C	C	C	C	C	C	C	C	snp	rs8181264
	P282	P	QR	16538055	18028661	G	A	A	A	A	A	A	A	A	A	A	A	A	A	A	A	A	A	A	A	A	G	G	G	G	G	G	G	G	G	G	G	G	G	G	G	G	G	snp	rs17307656
	P281	P	QR	17473657	18964263	G	A	A	A	A	A	A	A	A	A	A	A	A	A	A	A	A	A	A	A	A	G	G	G	G	G	G	G	G	G	G	G	G	G	G	G	G	G	snp	rs17315758
	P235	P	QR	17707606	19198212	G	A	A	A	A	A	A	A	A	A	A	A	A	A	A	A	A	A	A	A	A	G	G	G	G	G	G	G	G	G	G	G	G	G	G	G	G	G	snp	rs9786119
	M45	P	QR	20327175	21867787	A	G	G	G	G	G	G	G	G	G	G	G	G	G	G	G	G	G	G	G	G	A	A	A	A	A	A	A	A	A	A	A	A	A	A	A	A	A	snp	dbsnp.94:rs2032631		8284	KDM5D	NM_004653.3
	M74=N12	P	QR	20349155	21889767	A	G	G	G	G	G	G	G	G	G	G	G	G	G	G	G	G	G	G	G	G	A	A	A	A	A	A	A	A	A	A	A	A	A	A	A	A	A	snp	dbsnp.94:rs2032635		8284	KDM5D	NM_004653.3
	P284	P	QR	20531728	22072340	G	C	C	C	C	C	C	C	C	C	C	C	C	C	C	C	C	C	C	C	C	G	G	G	G	G	G	G	G	G	G	G	G	G	G	G	G	G	snp	rs4116821
	P283	P	QR	20553879	22094491	T	C	C	C	C	C	C	C	C	C	C	C	C	C	C	C	C	C	C	C	C	T	T	T	T	T	T	T	T	T	T	T	T	T	T	T	T	T	snp	rs3865828	CpG
	M207	R	R	14091377	15581983	G	A	A	A	A	A	A	A	A	A	A	A	A	A	A	A	A	A	A	A	A	A	G	G	G	G	G	G	G	G	G	G	G	G	G	G	G	G	snp	dbsnp.94:rs2032658		7404	UTY	NM_007125.3
	P224	R	R	15795387	17285993	T	C	C	C	C	C	C	C	C	C	C	C	C	C	C	C	C	C	C	C	C	C	T	T	T	T	T	T	T	T	T	T	T	T	T	T	T	T	snp	rs17307398
	P285	R	R	17776738	19267344	A	C	C	C	C	C	C	C	C	C	C	C	C	C	C	C	C	C	C	C	C	C	A	A	A	A	A	A	A	A	A	A	A	A	A	A	A	A	snp	rs17249974
	P227	R	R	19869094	21409706	C	G	G	G	G	G	G	G	G	G	G	G	G	G	G	G	G	G	G	G	G	G	C	C	C	C	C	C	C	C	C	C	C	C	C	C	C	C	snp	rs4481791
	P280	R	R	20302478	21843090	G	C	C	C	C	C	C	C	C	C	C	C	C	C	C	C	C	C	C	C	C	C	G	G	G	G	G	G	G	G	G	G	G	G	G	G	G	G	snp	rs891407
	P232	R	R	21444520	23035132	A	G	G	G	G	G	G	G	G	G	G	G	G	G	G	G	G	G	G	G	G	G	A	A	A	A	A	A	A	A	A	A	A	A	A	A	A	A	snp	rs9786261
	M173=P241	R1	R1	13535818	15026424	A	A	A	A	A	A	A	A	A	A	A	A	A	A	A	A	A	A	A	A	A	A	A	C	C	C	C	C	C	C	C	C	C	C	C	C	C	C	snp	dbsnp.94:rs2032624		8653	DDX3Y	NM_001122665.1
	P225	R1	R1	14099736	15590342	T	G	G	G	G	G	G	G	G	G	G	G	G	G	G	G	G	G	G	G	G	G	G	T	T	T	T	T	T	T	T	T	T	T	T	T	T	T	snp	dbsnp.123:rs17307070		7404	UTY	NM_007125.3
	P286	R1	R1	16225645	17716251	T	C	C	C	C	C	C	C	C	C	C	C	C	C	C	C	C	C	C	C	C	C	C	T	T	T	T	T	T	T	T	T	T	T	T	T	T	T	snp	rs1118473
	P236	R1	R1	16291572	17782178	G	C	C	C	C	C	C	C	C	C	C	C	C	C	C	C	C	C	C	C	C	C	C	G	G	G	G	G	G	G	G	G	G	G	G	G	G	G	snp	rs9785959
	P234	R1	R1	19577276	21117888	C	T	T	T	T	T	T	T	T	T	T	T	T	T	T	T	T	T	T	T	T	T	T	C	C	C	C	C	C	C	C	C	C	C	C	C	C	C	snp	rs9786197
	P233	R1	R1	19625746	21166358	G	T	T	T	T	T	T	T	T	T	T	T	T	T	T	T	T	T	T	T	T	T	T	G	G	G	G	G	G	G	G	G	G	G	G	G	G	G	snp	rs9786232
	M306	R1	R1	21159971	22750583	A	C	C	C	C	C	C	C	C	C	C	C	C	C	C	C	C	C	C	C	C	C	C	A	A	A	A	A	A	A	A	A	A	A	A	A	A	A	snp	dbsnp.88:rs1558843		9086	EIF1AY	NM_004681.2
	M198	R1a1	R1a	13540146	15030752	C	C	C	C	C	C	C	C	C	C	C	C	C	C	C	C	C	C	C	C	C	C	C	T	T	C	C	C	C	C	C	C	C	C	C	C	C	C	snp	dbsnp.94:rs2020857		8653	DDX3Y	NM_001122665.1
	M17	R1a1	R1a	20192556	21733168	G	G	G	G	G	G	G	G	G	G	G	G	G	G	G	G	G	G	G	G	G	G	G	delG	delG	G	G	G	G	G	G	G	G	G	G	G	G	G	delG	dbsnp.36:rs3908			TXLNG2P	NM_001005852.2
	M343	R1b	R1b	2947824	2887824	A	C	C	C	C	C	C	C	C	C	C	C	C	C	C	C	C	C	C	C	C	C	C	C	C	A	A	A	A	A	A	A	A	A	A	A	A	A	snp	rs9786184
	P297	R1b1b	R1b	17165902	18656508	C	G	G	G	G	G	G	G	G	G	G	G	G	G	G	G	G	G	G	G	G	G	G	G	G	C	C	C	C	C	C	C	C	C	C	C	C	C	snp	rs9785702
	M269	R1b1b	R1b	21148755	22739367	C	T	T	T	T	T	T	T	T	T	T	T	T	T	T	T	T	T	T	T	T	T	T	T	T	C	C	C	C	C	C	C	C	C	C	C	C	C	snp	dbsnp.119:rs9786153		9086	EIF1AY	NM_004681.2
	U152	R1b1b2h	R1b1b2h	13842543	15333149	C	C	C	C	C	C	C	C	C	C	C	C	C	C	C	C	C	C	C	C	C	C	C	C	C	C	C	T	T	T	C	C	C	C	C	C	C	C	snp	dbsnp.135:rs1236440
	P267	R2	R2	16538063	18028669	C	C	C	C	C	C	C	C	C	C	C	C	C	C	C	C	C	C	C	C	C	C	G	C	C	C	C	C	C	C	C	C	C	C	C	C	C	C	snp
	M124	R2	R2	20223889	21764501	G	G	G	G	G	G	G	G	G	G	G	G	G	G	G	G	G	G	G	G	G	G	A	G	G	G	G	G	G	G	G	G	G	G	G	G	G	G	snp		CpG	84663	CYorf15B	NM_032576.4
	P108	A1	not variable	13935641	15426247	T	T	T	T	T	T	T	T	T	T	T	T	T	T	T	T	T	T	T	T	T	T	T	T	T	T	T	T	T	T	T	T	T	T	T	T	T	T	snp			7404	UTY
	M31	A1a	not variable	20199142	21739754	G	G	G	G	G	G	G	G	G	G	G	G	G	G	G	G	G	G	G	G	G	G	G	G	G	G	G	G	G	G	G	G	G	G	G	G	G	G	snp				TXLNG2P
	P82	A1a	not variable	6799826	6739826	C	C	C	C	C	C	C	C	C	C	C	C	C	C	C	C	C	C	C	C	C	C	C	C	C	C	C	C	C	C	C	C	C	C	C	C	C	C	snp			266	AMELY
	V14	A1a	not variable	6950869	6890869	A	A	A	A	A	A	A	A	A	A	A	A	A	A	A	A	A	A	A	A	A	A	A	A	A	A	A	A	A	A	A	A	A	A	A	A	A	A	snp			90665	TBL1Y
	V15	A1a	not variable	6908153	6848153	G	G	G	G	G	G	G	G	G	G	G	G	G	G	G	G	G	G	G	G	G	G	G	G	G	G	G	G	G	G	G	G	G	G	G	G	G	G	snp			90665	TBL1Y
	V191	A1a	not variable	2932610	2872610	C	C	C	C	C	C	C	C	C	C	C	C	C	C	C	C	C	C	C	C	C	C	C	C	C	C	C	C	C	C	C	C	C	C	C	C	C	C	snp
	V201	A1a	not variable	2848626	2788626	T	T	T	T	T	T	T	T	T	T	T	T	T	T	T	T	T	T	T	T	T	T	T	T	T	T	T	T	T	T	T	T	T	T	T	T	T	T	snp
	V204	A1a	not variable	2923367	2863367	C	C	C	C	C	C	C	C	C	C	C	C	C	C	C	C	C	C	C	C	C	C	C	C	C	C	C	C	C	C	C	C	C	C	C	C	C	C	snp
	V214	A1a	not variable	2928496	2868496	A	A	A	A	A	A	A	A	A	A	A	A	A	A	A	A	A	A	A	A	A	A	A	A	A	A	A	A	A	A	A	A	A	A	A	A	A	A	snp
	V215	A1a	not variable	2928499	2868499	T	T	T	T	T	T	T	T	T	T	T	T	T	T	T	T	T	T	T	T	T	T	T	T	T	T	T	T	T	T	T	T	T	T	T	T	T	T	snp
	V25	A1a	not variable	6954625	6894625	G	G	G	G	G	G	G	G	G	G	G	G	G	G	G	G	G	G	G	G	G	G	G	G	G	G	G	G	G	G	G	G	G	G	G	G	G	G	snp			90665	TBL1Y
	V26	A1a	not variable	6954819	6894819	G	G	G	G	G	G	G	G	G	G	G	G	G	G	G	G	G	G	G	G	G	G	G	G	G	G	G	G	G	G	G	G	G	G	G	G	G	G	snp		CpG	90665	TBL1Y
	V28	A1a	not variable	6965202	6905202	C	C	C	C	C	C	C	C	C	C	C	C	C	C	C	C	C	C	C	C	C	C	C	C	C	C	C	C	C	C	C	C	C	C	C	C	C	C	snp		CpG	90665	TBL1Y
	V30	A1a	not variable	6992824	6932824	G	G	G	G	G	G	G	G	G	G	G	G	G	G	G	G	G	G	G	G	G	G	G	G	G	G	G	G	G	G	G	G	G	G	G	G	G	G	snp			90665	TBL1Y
	V4	A1a	not variable	6906482	6846482	G	G	G	G	G	G	G	G	G	G	G	G	G	G	G	G	G	G	G	G	G	G	G	G	G	G	G	G	G	G	G	G	G	G	G	G	G	G	snp			90665	TBL1Y
	V40	A1a	not variable	14938430	16429036	G	A	G	G	G	G	G	G	G	G	G	G	G	G	G	G	G	G	G	G	G	G	G	G	G	G	G	G	G	G	G	G	G	G	G	G	G	G	snp
	V48	A1a	not variable	15405751	16896357	G	G	G	G	G	G	G	G	G	G	G	G	G	G	G	G	G	G	G	G	G	G	G	G	G	G	G	G	G	G	G	G	G	G	G	G	G	G	snp			22829	NLGN4Y
	V53	A1a	not variable	16024818	17515424	A	A	A	A	A	A	A	A	A	A	A	A	A	A	A	A	A	A	A	A	A	A	A	A	A	A	A	A	A	A	A	A	A	A	A	A	A	A	snp
	V57	A1a	not variable	14702482	16193088	A	A	A	A	A	A	A	A	A	A	A	A	A	A	A	A	A	A	A	A	A	A	A	A	A	A	A	A	A	A	A	A	A	A	A	A	A	A	snp
	V58	A1a	not variable	14802066	16292672	G	G	G	G	G	G	G	G	G	G	G	G	G	G	G	G	G	G	G	G	G	G	G	G	G	G	G	G	G	G	G	G	G	G	G	G	G	G	snp
	V63	A1a	not variable	15711215	17201821	C	C	C	C	C	C	C	C	C	C	C	C	C	C	C	C	C	C	C	C	C	C	C	C	C	C	C	C	C	C	C	C	C	C	C	C	C	C	snp		CpG
	V76	A1a	not variable	15930606	17421212	G	G	G	G	G	G	G	G	G	G	G	G	G	G	G	G	G	G	G	G	G	G	G	G	G	G	G	G	G	G	G	G	G	G	G	G	G	G	snp		CpG
	V168	A1a-T	not variable	16457066	17947672	A	G	A	A	A	A	A	A	A	A	A	A	A	A	A	A	A	A	A	A	A	A	A	A	A	A	A	A	A	A	A	A	A	A	A	A	A	A	snp
	V203	A1a-T	not variable	2860714	2800714	C	T	C	C	C	C	C	C	C	C	C	C	C	C	C	C	C	C	C	C	C	C	C	C	C	C	C	C	C	C	C	C	C	C	C	C	C	C	snp
	V250	A1a-T	not variable	16154729	17645335	G	A	G	G	G	G	G	G	G	G	G	G	G	G	G	G	G	G	G	G	G	G	G	G	G	G	G	G	G	G	G	G	G	G	G	G	G	G	snp
	P114	A1b	not variable	13530049	15020655	G	G	G	G	G	G	G	G	G	G	G	G	G	G	G	G	G	G	G	G	G	G	G	G	G	G	G	G	G	G	G	G	G	G	G	G	G	G	snp		CpG	8653	DDX3Y
	V148	A1b	not variable	6848191	6788191	G	G	G	G	G	G	G	G	G	G	G	G	G	G	G	G	G	G	G	G	G	G	G	G	G	G	G	G	G	G	G	G	G	G	G	G	G	G	snp			90665	TBL1Y
	V149	A1b	not variable	6903151	6843151	T	T	T	T	T	T	T	T	T	T	T	T	T	T	T	T	T	T	T	T	T	T	T	T	T	T	T	T	T	T	T	T	T	T	T	T	T	T	snp			90665	TBL1Y
	V150	A1b	not variable	6907842	6847842	G	A	G	G	G	G	G	G	G	G	G	G	G	G	G	G	G	G	G	G	G	G	G	G	G	G	G	G	G	G	G	G	G	G	G	G	G	G	snp			90665	TBL1Y
	V151	A1b	not variable	6911720	6851720	G	G	G	G	G	G	G	G	G	G	G	G	G	G	G	G	G	G	G	G	G	G	G	G	G	G	G	G	G	G	G	G	G	G	G	G	G	G	snp			90665	TBL1Y
	V153	A1b	not variable	6928881	6868881	C	C	C	C	C	C	C	C	C	C	C	C	C	C	C	C	C	C	C	C	C	C	C	C	C	C	C	C	C	C	C	C	C	C	C	C	C	C	snp		CpG	90665	TBL1Y
	V154	A1b	not variable	6937891	6877891	A	A	A	A	A	A	A	A	A	A	A	A	A	A	A	A	A	A	A	A	A	A	A	A	A	A	A	A	A	A	A	A	A	A	A	A	A	A	snp			90665	TBL1Y
	V157	A1b	not variable	6959793	6899793	A	A	A	A	A	A	A	A	A	A	A	A	A	A	A	A	A	A	A	A	A	A	A	A	A	A	A	A	A	A	A	A	A	A	A	A	A	A	snp			90665	TBL1Y
	V158	A1b	not variable	6937314	6877314	G	G	G	G	G	G	G	G	G	G	G	G	G	G	G	G	G	G	G	G	G	G	G	G	G	G	G	G	G	G	G	G	G	G	G	G	G	G	snp			90665	TBL1Y
	V159	A1b	not variable	6992829	6932829	G	G	G	G	G	G	G	G	G	G	G	G	G	G	G	G	G	G	G	G	G	G	G	G	G	G	G	G	G	G	G	G	G	G	G	G	G	G	snp			90665	TBL1Y
	V161	A1b	not variable	14690541	16181147	G	A	G	G	G	G	G	G	G	G	G	G	G	G	G	G	G	G	G	G	G	G	G	G	G	G	G	G	G	G	G	G	G	G	G	G	G	G	snp
	V162	A1b	not variable	15427258	16917864	C	C	C	C	C	C	C	C	C	C	C	C	C	C	C	C	C	C	C	C	C	C	C	C	C	C	C	C	C	C	C	C	C	C	C	C	C	C	snp			22829	NLGN4Y
	V163	A1b	not variable	16705655	18196261	A	A	A	A	A	A	A	A	A	A	A	A	A	A	A	A	A	A	A	A	A	A	A	A	A	A	A	A	A	A	A	A	A	A	A	A	A	A	snp
	V164	A1b	not variable	16765208	18255814	C	C	C	C	C	C	C	C	C	C	C	C	C	C	C	C	C	C	C	C	C	C	C	C	C	C	C	C	C	C	C	C	C	C	C	C	C	C	snp		CpG
	V165	A1b	not variable	14786199	16276805	G	G	G	G	G	G	G	G	G	G	G	G	G	G	G	G	G	G	G	G	G	G	G	G	G	G	G	G	G	G	G	G	G	G	G	G	G	G	snp
	V166	A1b	not variable	14802260	16292866	G	G	G	G	G	G	G	G	G	G	G	G	G	G	G	G	G	G	G	G	G	G	G	G	G	G	G	G	G	G	G	G	G	G	G	G	G	G	snp
	V167	A1b	not variable	16108496	17599102	T	T	T	T	T	T	T	T	T	T	T	T	T	T	T	T	T	T	T	T	T	T	T	T	T	T	T	T	T	T	T	T	T	T	T	T	T	T	snp
	V176	A1b	not variable	6906615	6846615	C	C	C	C	C	C	C	C	C	C	C	C	C	C	C	C	C	C	C	C	C	C	C	C	C	C	C	C	C	C	C	C	C	C	C	C	C	C	snp		CpG	90665	TBL1Y
	V177	A1b	not variable	6923229	6863229	A	A	A	A	A	A	A	A	A	A	A	A	A	A	A	A	A	A	A	A	A	A	A	A	A	A	A	A	A	A	A	A	A	A	A	A	A	A	snp			90665	TBL1Y
	V181	A1b	not variable	12759732	14249732	G	G	G	G	G	G	G	G	G	G	G	G	G	G	G	G	G	G	G	G	G	G	G	G	G	G	G	G	G	G	G	G	G	G	G	G	G	G	snp
	V190	A1b	not variable	2932583	2872583	G	G	G	G	G	G	G	G	G	G	G	G	G	G	G	G	G	G	G	G	G	G	G	G	G	G	G	G	G	G	G	G	G	G	G	G	G	G	snp
	V196	A1b	not variable	21526955	23117567	G	G	G	G	G	G	G	G	G	G	G	G	G	G	G	G	G	G	G	G	G	G	G	G	G	G	G	G	G	G	G	G	G	G	G	G	G	G	snp
	M135	A2	not variable	20175681	21716293	T	G	T	T	T	T	T	T	T	T	T	T	T	T	T	T	T	T	T	T	T	T	T	T	T	T	T	T	T	T	T	T	T	T	T	T	T	T	1bp ins
	M14	A2	not variable	20181656	21722268	T	T	T	T	T	T	T	T	T	T	T	T	T	T	T	T	T	T	T	T	T	T	T	T	T	T	T	T	T	T	T	T	T	T	T	T	T	T	snp	rs3905
	M141	A2	not variable	20165365	21705977	A	A	A	A	A	A	A	A	A	A	A	A	A	A	A	A	A	A	A	A	A	A	A	A	A	A	A	A	A	A	A	A	A	A	A	A	A	A	snp
	M196	A2	not variable	13540076	15030682	C	C	C	C	C	C	C	C	C	C	C	C	C	C	C	C	C	C	C	C	C	C	C	C	C	C	C	C	C	C	C	C	C	C	C	C	C	C	snp	rs2032591		8653	DDX3Y
	M206	A2	not variable	14096856	15587462	T	T	T	T	T	T	T	T	T	T	T	T	T	T	T	T	T	T	T	T	T	T	T	T	T	T	T	T	T	T	T	T	T	T	T	T	T	T	snp	rs2032656		7404	UTY
	M212	A2	not variable	14036089	15526695	C	C	C	C	C	C	C	C	C	C	C	C	C	C	C	C	C	C	C	C	C	C	C	C	C	C	C	C	C	C	C	C	C	C	C	C	C	C	snp	rs2032664		7404	UTY
	M23	A2	not variable	20195627	21736239	A	A	A	A	A	A	A	A	A	A	A	A	A	A	A	A	A	A	A	A	A	A	A	A	A	A	A	A	A	A	A	A	A	A	A	A	A	A	snp				TXLNG2P
	M49	A2	not variable	20328114	21868726	T	T	T	T	T	T	T	T	T	T	T	T	T	T	T	T	T	T	T	T	T	T	T	T	T	T	T	T	T	T	T	T	T	T	T	T	T	T	snp	rs2032633		8284	KDM5D
	M6	A2	not variable	17080420	18571026	A	A	A	A	A	A	A	A	A	A	A	A	A	A	A	A	A	A	A	A	A	A	A	A	A	A	A	A	A	A	A	A	A	A	A	A	A	A	snp	rs3897
	M71	A2	not variable	20353835	21894447	C	C	C	C	C	C	C	C	C	C	C	C	C	C	C	C	C	C	C	C	C	C	C	C	C	C	C	C	C	C	C	C	C	C	C	C	C	C	snp	rs2032638		8284	KDM5D
	MEH1	A2	not variable	21906644	23497256	C	C	C	C	C	C	C	C	C	C	C	C	C	C	C	C	C	C	C	C	C	C	C	C	C	C	C	C	C	C	C	C	C	C	C	C	C	C	snp
	P247	A2	not variable	21151116	22741728	T	T	T	T	T	T	T	T	T	T	T	T	T	T	T	T	T	T	T	T	T	T	T	T	T	T	T	T	T	T	T	T	T	T	T	T	T	T	snp	rs9341312		9086	EIF1AY
	P248	A2	not variable	21151209	22741821	G	G	G	G	G	G	G	G	G	G	G	G	G	G	G	G	G	G	G	G	G	G	G	G	G	G	G	G	G	G	G	G	G	G	G	G	G	G	snp	rs9341314	CpG	9086	EIF1AY
	P3	A2	not variable	20069973	21610585	C	C	C	C	C	C	C	C	C	C	C	C	C	C	C	C	C	C	C	C	C	C	C	C	C	C	C	C	C	C	C	C	C	C	C	C	C	C	snp
	P5	A2	not variable	20303745	21844357	G	G	G	G	G	G	G	G	G	G	G	G	G	G	G	G	G	G	G	G	G	G	G	G	G	G	G	G	G	G	G	G	G	G	G	G	G	G	snp
	V180	A2	not variable	17979383	19469989	G	G	G	G	G	G	G	G	G	G	G	G	G	G	G	G	G	G	G	G	G	G	G	G	G	G	G	G	G	G	G	G	G	G	G	G	G	G	snp
	V188	A2	not variable	2838617	2778617	C	C	C	C	C	C	C	C	C	C	C	C	C	C	C	C	C	C	C	C	C	C	C	C	C	C	C	C	C	C	C	C	C	C	C	C	C	C	snp
	V192	A2	not variable	2750677	2690677	C	C	C	C	C	C	C	C	C	C	C	C	C	C	C	C	C	C	C	C	C	C	C	C	C	C	C	C	C	C	C	C	C	C	C	C	C	C	snp
	V198	A2	not variable	2813086	2753086	G	G	G	G	G	G	G	G	G	G	G	G	G	G	G	G	G	G	G	G	G	G	G	G	G	G	G	G	G	G	G	G	G	G	G	G	G	G	snp		CpG
	V200	A2	not variable	2842815	2782815	G	G	G	G	G	G	G	G	G	G	G	G	G	G	G	G	G	G	G	G	G	G	G	G	G	G	G	G	G	G	G	G	G	G	G	G	G	G	snp
	V50	A2	not variable	6905936	6845936	T	T	T	T	T	T	T	T	T	T	T	T	T	T	T	T	T	T	T	T	T	T	T	T	T	T	T	T	T	T	T	T	T	T	T	T	T	T	snp			90665	TBL1Y
	V60	A2	not variable	15711535	17202141	T	T	T	T	T	T	T	T	T	T	T	T	T	T	T	T	T	T	T	T	T	T	T	T	T	T	T	T	T	T	T	T	T	T	T	T	T	T	delT
	V61	A2	not variable	15711534	17202140	G	G	G	G	G	G	G	G	G	G	G	G	G	G	G	G	G	G	G	G	G	G	G	G	G	G	G	G	G	G	G	G	G	G	G	G	G	G	snp
	V70	A2	not variable	14690885	16181491	A	A	A	A	A	A	A	A	A	A	A	A	A	A	A	A	A	A	A	A	A	A	A	A	A	A	A	A	A	A	A	A	A	A	A	A	A	A	snp
	V72	A2	not variable	15092727	16583333	A	A	A	A	A	A	A	A	A	A	A	A	A	A	A	A	A	A	A	A	A	A	A	A	A	A	A	A	A	A	A	A	A	A	A	A	A	A	snp
	V79	A2	not variable	6939761	6879761	A	A	A	A	A	A	A	A	A	A	A	A	A	A	A	A	A	A	A	A	A	A	A	A	A	A	A	A	A	A	A	A	A	A	A	A	A	A	snp			90665	TBL1Y
	V80	A2	not variable	6947414	6887414	A	A	A	A	A	A	A	A	A	A	A	A	A	A	A	A	A	A	A	A	A	A	A	A	A	A	A	A	A	A	A	A	A	A	A	A	A	A	snp			90665	TBL1Y
	V81	A2	not variable	6955092	6895092	A	A	A	A	A	A	A	A	A	A	A	A	A	A	A	A	A	A	A	A	A	A	A	A	A	A	A	A	A	A	A	A	A	A	A	A	A	A	snp			90665	TBL1Y
	V82	A2	not variable	6955470	6895470	A	A	A	A	A	A	A	A	A	A	A	A	A	A	A	A	A	A	A	A	A	A	A	A	A	A	A	A	A	A	A	A	A	A	A	A	A	A	snp			90665	TBL1Y
	M114	A2a	not variable	20225151	21765763	A	A	A	A	A	A	A	A	A	A	A	A	A	A	A	A	A	A	A	A	A	A	A	A	A	A	A	A	A	A	A	A	A	A	A	A	A	A	snp
	P28	A2b	not variable	20340503	21881115	C	C	C	C	C	C	C	C	C	C	C	C	C	C	C	C	C	C	C	C	C	C	C	C	C	C	C	C	C	C	C	C	C	C	C	C	C	C	snp			8284	KDM5D
	P262	A2c	not variable	6992148	6932148	G	G	G	G	G	G	G	G	G	G	G	G	G	G	G	G	G	G	G	G	G	G	G	G	G	G	G	G	G	G	G	G	G	G	G	G	G	G	snp			90665	TBL1Y
	M28	A3a	not variable	20189227	21729839	T	T	T	T	T	T	T	T	T	T	T	T	T	T	T	T	T	T	T	T	T	T	T	T	T	T	T	T	T	T	T	T	T	T	T	T	T	T	snp				TXLNG2P
	M59	A3a	not variable	20328164	21868776	A	A	A	A	A	A	A	A	A	A	A	A	A	A	A	A	A	A	A	A	A	A	A	A	A	A	A	A	A	A	A	A	A	A	A	A	A	A	snp			8284	KDM5D
	M51	A3b1	not variable	20328251	21868863	G	G	G	G	G	G	G	G	G	G	G	G	G	G	G	G	G	G	G	G	G	G	G	G	G	G	G	G	G	G	G	G	G	G	G	G	G	G	snp	rs34078768		8284	KDM5D
	P102	A3b1a	not variable	13987411	15478017	T	C	T	T	T	T	T	T	T	T	T	T	T	T	T	T	T	T	T	T	T	T	T	T	T	T	T	T	T	T	T	T	T	T	T	T	T	T	snp			7404	UTY
	P71	A3b1a	not variable	20071466	21612078	A	A	A	A	A	A	A	A	A	A	A	A	A	A	A	A	A	A	A	A	A	A	A	A	A	A	A	A	A	A	A	A	A	A	A	A	A	A	snp
	M171	A3b2a	not variable	13323454	14814060	G	G	G	G	G	G	G	G	G	G	G	G	G	G	G	G	G	G	G	G	G	G	G	G	G	G	G	G	G	G	G	G	G	G	G	G	G	G	snp			8287	USP9Y
	M118	A3b2b	not variable	20223353	21763965	T	T	T	T	T	T	T	T	T	T	T	T	T	T	T	T	T	T	T	T	T	T	T	T	T	T	T	T	T	T	T	T	T	T	T	T	T	T	snp
	M181	B	not variable	13360948	14851554	T	T	T	T	T	T	T	T	T	T	T	T	T	T	T	T	T	T	T	T	T	T	T	T	T	T	T	T	T	T	T	T	T	T	T	T	T	T	snp	rs2032599		8287	USP9Y
	M60	B	not variable	20337460	21878072	G	G	G	G	G	G	G	G	G	G	G	G	G	G	G	G	G	G	G	G	G	G	G	G	G	G	G	G	G	G	G	G	G	G	G	G	G	G	1bp ins	rs2032623		8284	KDM5D
	M60	B	not variable	20337461	21878073	A	A	A	A	A	A	A	A	A	A	A	A	A	A	A	A	A	A	A	A	A	A	A	A	A	A	A	A	A	A	A	A	A	A	A	A	A	A	snp	rs2032623		8284	KDM5D
	P85	B	not variable	13529972	15020578	T	T	T	T	T	T	T	T	T	T	T	T	T	T	T	T	T	T	T	T	T	T	T	T	T	T	T	T	T	T	T	T	T	T	T	T	T	T	snp	rs9341290		8653	DDX3Y
	P90	B	not variable	13359973	14850579	C	C	C	C	C	C	C	C	C	C	C	C	C	C	C	C	C	C	C	C	C	C	C	C	C	C	C	C	C	C	C	C	C	C	C	C	C	C	snp			8287	USP9Y
	V185	B	not variable	12773400	14263400	G	G	G	G	G	G	G	G	G	G	G	G	G	G	G	G	G	G	G	G	G	G	G	G	G	G	G	G	G	G	G	G	G	G	G	G	G	G	snp
	V197	B	not variable	21529725	23120337	G	G	G	G	G	G	G	G	G	G	G	G	G	G	G	G	G	G	G	G	G	G	G	G	G	G	G	G	G	G	G	G	G	G	G	G	G	G	snp
	V217	B	not variable	6719577	6659577	C	C	C	C	C	C	C	C	C	C	C	C	C	C	C	C	C	C	C	C	C	C	C	C	C	C	C	C	C	C	C	C	C	C	C	C	C	C	snp		CpG
	V244	B	not variable	2858459	2798459	C	C	C	C	C	C	C	C	C	C	C	C	C	C	C	C	C	C	C	C	C	C	C	C	C	C	C	C	C	C	C	C	C	C	C	C	C	C	snp		CpG
	V62	B	not variable	15711285	17201891	G	G	G	G	G	G	G	G	G	G	G	G	G	G	G	G	G	G	G	G	G	G	G	G	G	G	G	G	G	G	G	G	G	G	G	G	G	G	snp
	V75	B	not variable	15930743	17421349	G	G	G	G	G	G	G	G	G	G	G	G	G	G	G	G	G	G	G	G	G	G	G	G	G	G	G	G	G	G	G	G	G	G	G	G	G	G	snp		CpG
	V78	B	not variable	6919558	6859558	C	C	C	C	C	C	C	C	C	C	C	C	C	C	C	C	C	C	C	C	C	C	C	C	C	C	C	C	C	C	C	C	C	C	C	C	C	C	snp			90665	TBL1Y
	V83	B	not variable	6930606	6870606	G	G	G	G	G	G	G	G	G	G	G	G	G	G	G	G	G	G	G	G	G	G	G	G	G	G	G	G	G	G	G	G	G	G	G	G	G	G	snp		CpG	90665	TBL1Y
	V84	B	not variable	6931379	6871379	G	G	G	G	G	G	G	G	G	G	G	G	G	G	G	G	G	G	G	G	G	G	G	G	G	G	G	G	G	G	G	G	G	G	G	G	G	G	T ins			90665	TBL1Y
	V85	B	not variable	6947162	6887162	C	C	C	C	C	C	C	C	C	C	C	C	C	C	C	C	C	C	C	C	C	C	C	C	C	C	C	C	C	C	C	C	C	C	C	C	C	C	snp			90665	TBL1Y
	M146	B1a	not variable	20238639	21779251	T	T	T	T	T	T	T	T	T	T	T	T	T	T	T	T	T	T	T	T	T	T	T	T	T	T	T	T	T	T	T	T	T	T	T	T	T	T	snp
	M182	B2	not variable	13378470	14869076	C	C	C	C	C	C	C	C	C	C	C	C	C	C	C	C	C	C	C	C	C	C	C	C	C	C	C	C	C	C	C	C	C	C	C	C	C	C	snp	rs2032601	CpG	8287	USP9Y
	M150	B2a	not variable	20328907	21869519	C	C	C	C	C	C	C	C	C	C	C	C	C	C	C	C	C	C	C	C	C	C	C	C	C	C	C	C	C	C	C	C	C	C	C	C	C	C	snp		CpG	8284	KDM5D
	M218	B2a1	not variable	13946457	15437063	C	C	C	C	C	C	C	C	C	C	C	C	C	C	C	C	C	C	C	C	C	C	C	C	C	C	C	C	C	C	C	C	C	C	C	C	C	C	snp	rs2032671		7404	UTY
	M109	B2a1a	not variable	20233568	21774180	G	A	G	G	G	G	G	G	G	G	G	G	G	G	G	G	G	G	G	G	G	G	G	G	G	G	G	G	G	G	G	G	G	G	G	G	G	G	snp
	M152	B2a1a	not variable	20327456	21868068	C	C	C	C	C	C	C	C	C	C	C	C	C	C	C	C	C	C	C	C	C	C	C	C	C	C	C	C	C	C	C	C	C	C	C	C	C	C	snp		CpG	8284	KDM5D
	P32	B2a1a	not variable	13005252	14495244	T	T	T	T	T	T	T	T	T	T	T	T	T	T	T	T	T	T	T	T	T	T	T	T	T	T	T	T	T	T	T	T	T	T	T	T	T	T	snp				GYG2P1
	P50	B2a1a	not variable	13005250	14495242	G	G	G	G	G	G	G	G	G	G	G	G	G	G	G	G	G	G	G	G	G	G	G	G	G	G	G	G	G	G	G	G	G	G	G	G	G	G	Gdel				GYG2P1
	M108.1	B2a2	not variable	20392323	21932935	T	T	T	T	T	T	T	T	T	T	T	T	T	T	T	T	T	T	T	T	T	T	T	T	T	T	T	T	T	T	T	T	T	T	T	T	T	T	snp	rs2032679
	P111	B2a2a	not variable	13935056	15425662	G	G	G	G	G	G	G	G	G	G	G	G	G	G	G	G	G	G	G	G	G	G	G	G	G	G	G	G	G	G	G	G	G	G	G	G	G	G	snp			7404	UTY
	50f2(P)	B2b	not variable	21906455	23497067	C	C	C	C	C	C	C	C	C	C	C	C	C	C	C	C	C	C	C	C	C	C	C	C	C	C	C	C	C	C	C	C	C	C	C	C	C	C	snp
	M112	B2b	not variable	20227347	21767959	C	C	C	C	C	C	C	C	C	C	C	C	C	C	C	C	C	C	C	C	C	C	C	C	C	C	C	C	C	C	C	C	C	C	C	C	C	C	snp
	M192	B2b	not variable	13523656	15014262	C	C	C	C	C	C	C	C	C	C	C	C	C	C	C	C	C	C	C	C	C	C	C	C	C	C	C	C	C	C	C	C	C	C	C	C	C	C	snp	rs2032662
	P6	B2b1	not variable	6828265	6768265	G	G	G	G	G	G	G	G	G	G	G	G	G	G	G	G	G	G	G	G	G	G	G	G	G	G	G	G	G	G	G	G	G	G	G	G	G	G	snp
	M115	B2b2	not variable	20225698	21766310	G	G	G	G	G	G	G	G	G	G	G	G	G	G	G	G	G	G	G	G	G	G	G	G	G	G	G	G	G	G	G	G	G	G	G	G	G	G	snp		CpG
	M169	B2b2	not variable	13323111	14813717	T	T	T	T	T	T	T	T	T	T	T	T	T	T	T	T	T	T	T	T	T	T	T	T	T	T	T	T	T	T	T	T	T	T	T	T	T	T	snp	rs2032594		8287	USP9Y
	M129	B2b3	not variable	20177105	21717717	C	C	C	C	C	C	C	C	C	C	C	C	C	C	C	C	C	C	C	C	C	C	C	C	C	C	C	C	C	C	C	C	C	C	C	C	C	C	snp		CpG
	M30	B2b3	not variable	20199203	21739815	G	G	G	G	G	G	G	G	G	G	G	G	G	G	G	G	G	G	G	G	G	G	G	G	G	G	G	G	G	G	G	G	G	G	G	G	G	G	snp				TXLNG2P
	P70	B2b4a	not variable	20071656	21612268	C	C	C	C	C	C	C	C	C	C	C	C	C	C	C	C	C	C	C	C	C	C	C	C	C	C	C	C	C	C	C	C	C	C	C	C	C	C	snp
	M211	B2b4b	not variable	14054008	15544614	C	C	C	C	C	C	C	C	C	C	C	C	C	C	C	C	C	C	C	C	C	C	C	C	C	C	C	C	C	C	C	C	C	C	C	C	C	C	snp	rs2032663		7404	UTY
	P112	B2c	not variable	20340313	21880925	G	G	G	G	G	G	G	G	G	G	G	G	G	G	G	G	G	G	G	G	G	G	G	G	G	G	G	G	G	G	G	G	G	G	G	G	G	G	snp			8284	KDM5D
	M216	C	not variable	13946958	15437564	C	C	C	C	C	C	C	C	C	C	C	C	C	C	C	C	C	C	C	C	C	C	C	C	C	C	C	C	C	C	C	C	C	C	C	C	C	C	snp	rs2032666		7404	UTY
	P184	C	not variable	7278128	7218128	T	T	T	T	T	T	T	T	T	T	T	T	T	T	T	T	T	T	T	T	T	T	T	T	T	T	T	T	T	T	T	T	T	T	T	T	T	T	snp
	P260	C	not variable	15795400	17286006	A	A	A	A	A	A	A	A	A	A	A	A	A	A	A	A	A	A	A	A	A	A	A	A	A	A	A	A	A	A	A	A	A	A	A	A	A	A	snp
	RPS4Y711=M130	C	not variable	2794854	2734854	C	C	C	C	C	C	C	C	C	C	C	C	C	C	C	C	C	C	C	C	C	C	C	C	C	C	C	C	C	C	C	C	C	C	C	C	C	C	snp	rs35284970		6192	RPS4Y1
	V182	C	not variable	12759991	14249991	C	C	C	C	C	C	C	C	C	C	C	C	C	C	C	C	C	C	C	C	C	C	C	C	C	C	C	C	C	C	C	C	C	C	C	C	C	C	snp
	V183	C	not variable	12773271	14263271	G	G	G	G	G	G	G	G	G	G	G	G	G	G	G	G	G	G	G	G	G	G	G	G	G	G	G	G	G	G	G	G	G	G	G	G	G	G	snp
	V184	C	not variable	12773293	14263293	C	C	C	C	C	C	C	C	C	C	C	C	C	C	C	C	C	C	C	C	C	C	C	C	C	C	C	C	C	C	C	C	C	C	C	C	C	C	snp
	V199	C	not variable	2832928	2772928	C	C	C	C	C	C	C	C	C	C	C	C	C	C	C	C	C	C	C	C	C	C	C	C	C	C	C	C	C	C	C	C	C	C	C	C	C	C	snp
	V20	C	not variable	6905955	6845955	G	G	G	G	G	G	G	G	G	G	G	G	G	G	G	G	G	G	G	G	G	G	G	G	G	G	G	G	G	G	G	G	G	G	G	G	G	G	snp			90665	TBL1Y
	V219	C	not variable	6724018	6664018	T	T	T	T	T	T	T	T	T	T	T	T	T	T	T	T	T	T	T	T	T	T	T	T	T	T	T	T	T	T	T	T	T	T	T	T	T	T	snp
	V77	C	not variable	16456936	17947542	C	C	C	C	C	C	C	C	C	C	C	C	C	C	C	C	C	C	C	C	C	C	C	C	C	C	C	C	C	C	C	C	C	C	C	C	C	C	snp
	V86	C	not variable	6969957	6909957	G	G	G	G	G	G	G	G	G	G	G	G	G	G	G	G	G	G	G	G	G	G	G	G	G	G	G	G	G	G	G	G	G	G	G	G	G	G	snp			90665	TBL1Y
	M105	C1	not variable	20325879	21866491	C	C	C	C	C	C	C	C	C	C	C	C	C	C	C	C	C	C	C	C	C	C	C	C	C	C	C	C	C	C	C	C	C	C	C	C	C	C	snp	rs2032612		8284	KDM5D
	M8	C1	not variable	7351534	7291534	G	G	G	G	G	G	G	G	G	G	G	G	G	G	G	G	G	G	G	G	G	G	G	G	G	G	G	G	G	G	G	G	G	G	G	G	G	G	snp	rs3899
	P122	C1	not variable	13360126	14850732	C	C	C	C	C	C	C	C	C	C	C	C	C	C	C	C	C	C	C	C	C	C	C	C	C	C	C	C	C	C	C	C	C	C	C	C	C	C	snp			8287	USP9Y
	P121	C1a	not variable	6799857	6739857	C	C	C	C	C	C	C	C	C	C	C	C	C	C	C	C	C	C	C	C	C	C	C	C	C	C	C	C	C	C	C	C	C	C	C	C	C	C	snp		CpG	266	AMELY
	M38	C2	not variable	20201546	21742158	T	T	T	T	T	T	T	T	T	T	T	T	T	T	T	T	T	T	T	T	T	T	T	T	T	T	T	T	T	T	T	T	T	T	T	T	T	T	snp				TXLNG2P
	M208	C2a	not variable	14085597	15576203	C	C	C	C	C	C	C	C	C	C	C	C	C	C	C	C	C	C	C	C	C	C	C	C	C	C	C	C	C	C	C	C	C	C	C	C	C	C	snp	rs2032659	CpG	7404	UTY
	P54	C2a2	not variable	13001667	14491659	A	A	A	A	A	A	A	A	A	A	A	A	A	A	A	A	A	A	A	A	A	A	A	A	A	A	A	A	A	A	A	A	A	A	A	A	A	A	snp				GYG2P1
	M217	C3	not variable	13946727	15437333	A	A	A	A	A	A	A	A	A	A	A	A	A	A	A	A	A	A	A	A	A	A	A	A	A	A	A	A	A	A	A	A	A	A	A	A	A	A	snp	rs2032668		7404	UTY
	P44	C3	not variable	13005259	14495251	G	T	G	G	G	G	G	G	G	G	G	G	G	G	G	G	G	G	G	G	G	G	G	G	G	G	G	G	G	G	G	G	G	G	G	G	G	G	snp				GYG2P1
	PK2	C3	not variable	21078608	22669220	T	T	T	T	T	T	T	T	T	T	T	T	T	T	T	T	T	T	T	T	T	T	T	T	T	T	T	T	T	T	T	T	T	T	T	T	T	T	snp				TTTY10
	M93	C3a	not variable	20361893	21902505	C	C	C	C	C	C	C	C	C	C	C	C	C	C	C	C	C	C	C	C	C	C	C	C	C	C	C	C	C	C	C	C	C	C	C	C	C	C	snp			8284	KDM5D
	P39	C3b	not variable	12994589	14484581	G	G	G	G	G	G	G	G	G	G	G	G	G	G	G	G	G	G	G	G	G	G	G	G	G	G	G	G	G	G	G	G	G	G	G	G	G	G	snp				GYG2P1
	M48	C3c	not variable	20209269	21749881	A	A	A	A	A	A	A	A	A	A	A	A	A	A	A	A	A	A	A	A	A	A	A	A	A	A	A	A	A	A	A	A	A	A	A	A	A	A	snp				TXLNG2P
	M77	C3c	not variable	20218526	21759138	C	C	C	C	C	C	C	C	C	C	C	C	C	C	C	C	C	C	C	C	C	C	C	C	C	C	C	C	C	C	C	C	C	C	C	C	C	C	snp
	M86	C3c	not variable	20365305	21905917	T	T	T	T	T	T	T	T	T	T	T	T	T	T	T	T	T	T	T	T	T	T	T	T	T	T	T	T	T	T	T	T	T	T	T	T	T	T	snp	rs2032643		8284	KDM5D
	M407	C3d	not variable	2810408	2750408	A	A	A	A	A	A	A	A	A	A	A	A	A	A	A	A	A	A	A	A	A	A	A	A	A	A	A	A	A	A	A	A	A	A	A	A	A	A	snp
	P53.1	C3e	not variable	13001657	14491649	T	T	T	T	T	T	T	T	T	T	T	T	T	T	T	T	T	T	T	T	T	T	T	T	T	T	T	T	T	T	T	T	T	T	T	T	T	T	snp				GYG2P1
	P62	C3f	not variable	20303337	21843949	T	T	T	T	T	T	T	T	T	T	T	T	T	T	T	T	T	T	T	T	T	T	T	T	T	T	T	T	T	T	T	T	T	T	T	T	T	T	C ins
	M347	C4	not variable	2937478	2877478	C	C	C	C	C	C	C	C	C	C	C	C	C	C	C	C	C	C	C	C	C	C	C	C	C	C	C	C	C	C	C	C	C	C	C	C	C	C	snp
	M210	C4a	not variable	14085174	15575780	A	A	A	A	A	A	A	A	A	A	A	A	A	A	A	A	A	A	A	A	A	A	A	A	A	A	A	A	A	A	A	A	A	A	A	A	A	A	snp	rs2032660		7404	UTY
	M356	C5	not variable	2948203	2888203	C	C	C	C	C	C	C	C	C	C	C	C	C	C	C	C	C	C	C	C	C	C	C	C	C	C	C	C	C	C	C	C	C	C	C	C	C	C	snp
	P92	C5a	not variable	13360247	14850853	C	C	C	C	C	C	C	C	C	C	C	C	C	C	C	C	C	C	C	C	C	C	C	C	C	C	C	C	C	C	C	C	C	C	C	C	C	C	snp			8287	USP9Y
	P55	C6	not variable	12998960	14488952	C	C	C	C	C	C	C	C	C	C	C	C	C	C	C	C	C	C	C	C	C	C	C	C	C	C	C	C	C	C	C	C	C	C	C	C	C	C	snp				GYG2P1
	M15	D1	not variable	20184087	21724699	G	G	G	G	G	G	G	G	G	G	G	G	G	G	G	G	G	G	G	G	G	G	G	G	G	G	G	G	G	G	G	G	G	G	G	G	G	G	9 bp ins	rs3906
	N1	D1a	not variable	13360920	14851526	C	C	C	C	C	C	C	C	C	C	C	C	C	C	C	C	C	C	C	C	C	C	C	C	C	C	C	C	C	C	C	C	C	C	C	C	C	C	snp	rs3212291		8287	USP9Y
	N2	D1a1	not variable	20359276	21899888	T	T	T	T	T	T	T	T	T	T	T	T	T	T	T	T	T	T	T	T	T	T	T	T	T	T	T	T	T	T	T	T	T	T	T	T	T	T	snp	rs3212287		8284	KDM5D
	M125	D2a1	not variable	20389674	21930286	A	G	A	A	A	A	A	A	A	A	A	A	A	A	A	A	A	A	A	A	A	A	A	A	A	A	A	A	A	A	A	A	A	A	A	A	A	A	snp	rs2032614
	P42	D2a1a	not variable	12991737	14481729	G	G	G	G	G	G	G	G	G	G	G	G	G	G	G	G	G	G	G	G	G	G	G	G	G	G	G	G	G	G	G	G	G	G	G	G	G	G	snp		CpG		GYG2P1
	M151	D2a2	not variable	20352022	21892634	G	G	G	G	G	G	G	G	G	G	G	G	G	G	G	G	G	G	G	G	G	G	G	G	G	G	G	G	G	G	G	G	G	G	G	G	G	G	snp			8284	KDM5D
	P120	D2a3	not variable	13935394	15426000	C	C	C	C	C	C	C	C	C	C	C	C	C	C	C	C	C	C	C	C	C	C	C	C	C	C	C	C	C	C	C	C	C	C	C	C	C	C	snp			7404	UTY
	P99	D3	not variable	13395780	14886386	C	C	C	C	C	C	C	C	C	C	C	C	C	C	C	C	C	C	C	C	C	C	C	C	C	C	C	C	C	C	C	C	C	C	C	C	C	C	snp		CpG	8287	USP9Y
	P47	D3a	not variable	13007176	14497168	C	C	C	C	C	C	C	C	C	C	C	C	C	C	C	C	C	C	C	C	C	C	C	C	C	C	C	C	C	C	C	C	C	C	C	C	C	C	snp				GYG2P1
	M44	E1a1	not variable	20212032	21752644	G	G	G	G	G	G	G	G	G	G	G	G	G	G	G	G	G	G	G	G	G	G	G	G	G	G	G	G	G	G	G	G	G	G	G	G	G	G	snp
	M58	E1b1a1	not variable	20195692	21736304	G	G	G	G	G	G	G	G	G	G	G	G	G	G	G	G	G	G	G	G	G	G	G	G	G	G	G	G	G	G	G	G	G	G	G	G	G	G	snp		CpG		TXLNG2P
	V39 Ê	E1b1a1g1d	not variable	14791776	16282382	C	C	C	C	C	C	C	C	C	C	C	C	C	C	C	C	C	C	C	C	C	C	C	C	C	C	C	C	C	C	C	C	C	C	C	C	C	C	snp
	M149	E1b1a3	not variable	20355636	21896248	G	G	G	G	G	G	G	G	G	G	G	G	G	G	G	G	G	G	G	G	G	G	G	G	G	G	G	G	G	G	G	G	G	G	G	G	G	G	snp		CpG	8284	KDM5D
	M154	E1b1a4	not variable	20352065	21892677	T	T	T	T	T	T	T	T	T	T	T	T	T	T	T	T	T	T	T	T	T	T	T	T	T	T	T	T	T	T	T	T	T	T	T	T	T	T	snp			8284	KDM5D
	M155	E1b1a5	not variable	20195719	21736331	G	G	G	G	G	G	G	G	G	G	G	G	G	G	G	G	G	G	G	G	G	G	G	G	G	G	G	G	G	G	G	G	G	G	G	G	G	G	snp		CpG		TXLNG2P
	M10	E1b1a6	not variable	20182386	21722998	T	T	T	T	T	T	T	T	T	T	T	T	T	T	T	T	T	T	T	T	T	T	T	T	T	T	T	T	T	T	T	T	T	T	T	T	T	T	snp	rs3901
	M156	E1b1a6	not variable	20176615	21717227	T	T	T	T	T	T	T	T	T	T	T	T	T	T	T	T	T	T	T	T	T	T	T	T	T	T	T	T	T	T	T	T	T	T	T	T	T	T	snp
	M195	E1b1a6	not variable	13525930	15016536	A	A	A	A	A	A	A	A	A	A	A	A	A	A	A	A	A	A	A	A	A	A	A	A	A	A	A	A	A	A	A	A	A	A	A	A	A	A	snp	rs2032680		8653	DDX3Y
	M66	E1b1a6	not variable	20340961	21881573	A	A	A	A	A	A	A	A	A	A	A	A	A	A	A	A	A	A	A	A	A	A	A	A	A	A	A	A	A	A	A	A	A	A	A	A	A	A	snp	rs2032627		8284	KDM5D
	P115	E1b1a7a2	not variable	13378644	14869250	G	T	G	G	G	G	G	G	G	G	G	G	G	G	G	G	G	G	G	G	G	G	G	G	G	G	G	G	G	G	G	G	G	G	G	G	G	G	snp			8287	USP9Y
	P116	E1b1a7a3	not variable	13379084	14869690	A	A	A	A	A	A	A	A	A	A	A	A	A	A	A	A	A	A	A	A	A	A	A	A	A	A	A	A	A	A	A	A	A	A	A	A	A	A	snp			8287	USP9Y
	P113	E1b1a7a3a	not variable	6800171	6740171	A	A	A	A	A	A	A	A	A	A	A	A	A	A	A	A	A	A	A	A	A	A	A	A	A	A	A	A	A	A	A	A	A	A	A	A	A	A	snp			266	AMELY
	P59	E1b1a8a2	not variable	12994545	14484537	A	A	A	A	A	A	A	A	A	A	A	A	A	A	A	A	A	A	A	A	A	A	A	A	A	A	A	A	A	A	A	A	A	A	A	A	A	A	snp				GYG2P1
	V12	E1b1b1a1	not variable	6883099	6823099	A	A	A	A	A	A	A	A	A	A	A	A	A	A	A	A	A	A	A	A	A	A	A	A	A	A	A	A	A	A	A	A	A	A	A	A	A	A	snp			90665	TBL1Y
	M224	E1b1b1a1a	not variable	20352687	21893299	T	T	T	T	T	T	T	T	T	T	T	T	T	T	T	T	T	T	T	T	T	T	T	T	T	T	T	T	T	T	T	T	T	T	T	T	T	T	snp			8284	KDM5D
	V32	E1b1b1a1b	not variable	6992821	6932821	G	G	G	G	G	G	G	G	G	G	G	G	G	G	G	G	G	G	G	G	G	G	G	G	G	G	G	G	G	G	G	G	G	G	G	G	G	G	snp			90665	TBL1Y
	V27	E1b1b1a2a	not variable	6956051	6896051	A	A	A	A	A	A	A	A	A	A	A	A	A	A	A	A	A	A	A	A	A	A	A	A	A	A	A	A	A	A	A	A	A	A	A	A	A	A	snp			90665	TBL1Y
	M148	E1b1b1a3a	not variable	20355481	21896093	A	A	A	A	A	A	A	A	A	A	A	A	A	A	A	A	A	A	A	A	A	A	A	A	A	A	A	A	A	A	A	A	A	A	A	A	A	A	snp			8284	KDM5D
	V19	E1b1b1a3b	not variable	20355588	21896200	T	T	T	T	T	T	T	T	T	T	T	T	T	T	T	T	T	T	T	T	T	T	T	T	T	T	T	T	T	T	T	T	T	T	T	T	T	T	snp			8284	KDM5D
	V65	E1b1b1a4	not variable	15797066	17287672	G	G	G	G	G	G	G	G	G	G	G	G	G	G	G	G	G	G	G	G	G	G	G	G	G	G	G	G	G	G	G	G	G	G	G	G	G	G	snp
	V257	E1b1b1b	not variable	12994554	14484546	T	T	T	T	T	T	T	T	T	T	T	T	T	T	T	T	T	T	T	T	T	T	T	T	T	T	T	T	T	T	T	T	T	T	T	T	T	T	snp				GYG2P1
	M81	E1b1b1b	not variable	20351960	21892572	C	C	C	C	C	C	C	C	C	C	C	C	C	C	C	C	C	C	C	C	C	C	C	C	C	C	C	C	C	C	C	C	C	C	C	C	C	C	snp	rs2032640		8284	KDM5D
	M107	E1b1b1b1	not variable	20391026	21931638	A	A	A	A	A	A	A	A	A	A	A	A	A	A	A	A	A	A	A	A	A	A	A	A	A	A	A	A	A	A	A	A	A	A	A	A	A	A	snp	rs2032613
	M165	E1b1b1b2	not variable	20326047	21866659	G	G	G	G	G	G	G	G	G	G	G	G	G	G	G	G	G	G	G	G	G	G	G	G	G	G	G	G	G	G	G	G	G	G	G	G	G	G	snp			8284	KDM5D
	M123	E1b1b1c	not variable	20223974	21764586	C	C	C	C	C	C	C	C	C	C	C	C	C	C	C	C	C	C	C	C	C	C	C	C	C	C	C	C	C	C	C	C	C	C	C	C	C	C	snp
	M34	E1b1b1c1	not variable	20200104	21740716	G	G	G	G	G	G	G	G	G	G	G	G	G	G	G	G	G	G	G	G	G	G	G	G	G	G	G	G	G	G	G	G	G	G	G	G	G	G	snp				TXLNG2P
	M136	E1b1b1c1a	not variable	20353141	21893753	C	C	C	C	C	C	C	C	C	C	C	C	C	C	C	C	C	C	C	C	C	C	C	C	C	C	C	C	C	C	C	C	C	C	C	C	C	C	snp	rs2032618	CpG	8284	KDM5D
	M84	E1b1b1c1a	not variable	20357751	21898363	T	T	T	T	T	T	T	T	T	T	T	T	T	T	T	T	T	T	T	T	T	T	T	T	T	T	T	T	T	T	T	T	T	T	T	T	T	T	A del	rs2032642		8284	KDM5D
	M290	E1b1b1c1b	not variable	20338213	21878825	C	C	C	C	C	C	C	C	C	C	C	C	C	C	C	C	C	C	C	C	C	C	C	C	C	C	C	C	C	C	C	C	C	C	C	C	C	C	snp	rs13447369	CpG	8284	KDM5D
	V23	E1b1b1c1c	not variable	6920272	6860272	C	C	C	C	C	C	C	C	C	C	C	C	C	C	C	C	C	C	C	C	C	C	C	C	C	C	C	C	C	C	C	C	C	C	C	C	C	C	snp			90665	TBL1Y
	M281	E1b1b1d	not variable	20223888	21764500	C	C	C	C	C	C	C	C	C	C	C	C	C	C	C	C	C	C	C	C	C	C	C	C	C	C	C	C	C	C	C	C	C	C	C	C	C	C	snp	rs13447370	CpG
	M293	E1b1b1e	not variable	21154327	22744939	T	T	T	T	T	T	T	T	T	T	T	T	T	T	T	T	T	T	T	T	T	T	T	T	T	T	T	T	T	T	T	T	T	T	T	T	T	T	snp			9086	EIF1AY
	V6	E1b1b1e	not variable	6992007	6932007	G	G	G	G	G	G	G	G	G	G	G	G	G	G	G	G	G	G	G	G	G	G	G	G	G	G	G	G	G	G	G	G	G	G	G	G	G	G	snp			90665	TBL1Y
	P72	E1b1b1f	not variable	20070241	21610853	C	C	C	C	C	C	C	C	C	C	C	C	C	C	C	C	C	C	C	C	C	C	C	C	C	C	C	C	C	C	C	C	C	C	C	C	C	C	snp
	V42	E1b1b1f	not variable	14946738	16437344	G	G	G	G	G	G	G	G	G	G	G	G	G	G	G	G	G	G	G	G	G	G	G	G	G	G	G	G	G	G	G	G	G	G	G	G	G	G	snp		CpG
	V16	E1b1b2	not variable	6911471	6851471	C	C	C	C	C	C	C	C	C	C	C	C	C	C	C	C	C	C	C	C	C	C	C	C	C	C	C	C	C	C	C	C	C	C	C	C	C	C	snp		CpG	90665	TBL1Y
	M329	E1b1c	not variable	2935527	2875527	G	G	G	G	G	G	G	G	G	G	G	G	G	G	G	G	G	G	G	G	G	G	G	G	G	G	G	G	G	G	G	G	G	G	G	G	G	G	snp
	P75	E1b2	not variable	20340386	21880998	G	G	G	G	G	G	G	G	G	G	G	G	G	G	G	G	G	G	G	G	G	G	G	G	G	G	G	G	G	G	G	G	G	G	G	G	G	G	snp			8284	KDM5D
	M75	E2	not variable	20349565	21890177	G	G	G	G	G	G	G	G	G	G	G	G	G	G	G	G	G	G	G	G	G	G	G	G	G	G	G	G	G	G	G	G	G	G	G	G	G	G	snp	rs2032639	CpG	8284	KDM5D
	P68	E2	not variable	13435749	14926355	T	T	T	T	T	T	T	T	T	T	T	T	T	T	T	T	T	T	T	T	T	T	T	T	T	T	T	T	T	T	T	T	T	T	T	T	T	T	snp			8287	USP9Y
	M41=P210	E2a	not variable	2723889	2663889	C	C	C	C	C	C	C	C	C	C	C	C	C	C	C	C	C	C	C	C	C	C	C	C	C	C	C	C	C	C	C	C	C	C	C	C	C	C	snp
	M54	E2b	not variable	20328652	21869264	G	G	G	G	G	G	G	G	G	G	G	G	G	G	G	G	G	G	G	G	G	G	G	G	G	G	G	G	G	G	G	G	G	G	G	G	G	G	snp	rs2032620	CpG	8284	KDM5D
	M90	E2b	not variable	20383717	21924329	C	C	C	C	C	C	C	C	C	C	C	C	C	C	C	C	C	C	C	C	C	C	C	C	C	C	C	C	C	C	C	C	C	C	C	C	C	C	snp	rs2032646
	M98	E2b	not variable	20238622	21779234	C	C	C	C	C	C	C	C	C	C	C	C	C	C	C	C	C	C	C	C	C	C	C	C	C	C	C	C	C	C	C	C	C	C	C	C	C	C	snp
	M85	E2b1	not variable	20355604	21896216	C	C	C	C	C	C	C	C	C	C	C	C	C	C	C	C	C	C	C	C	C	C	C	C	C	C	C	C	C	C	C	C	C	C	C	C	C	C	snp	rs2032616		8284	KDM5D
	M200	E2b1a	not variable	13540810	15031416	G	G	G	G	G	G	G	G	G	G	G	G	G	G	G	G	G	G	G	G	G	G	G	G	G	G	G	G	G	G	G	G	G	G	G	G	G	G	snp	rs2032593		8653	DDX3Y
	P45	E2b1a1	not variable	20340135	21880747	G	G	G	G	G	G	G	G	G	G	G	G	G	G	G	G	G	G	G	G	G	G	G	G	G	G	G	G	G	G	G	G	G	G	G	G	G	G	snp			8284	KDM5D
	P258	E2b1a2	not variable	13540552	15031158	T	T	T	T	T	T	T	T	T	T	T	T	T	T	T	T	T	T	T	T	T	T	T	T	T	T	T	T	T	T	T	T	T	T	T	T	T	T	A ins			8653	DDX3Y
	V69	F	not variable	16608448	18099054	C	C	C	C	C	C	C	C	C	C	C	C	C	C	C	C	C	C	C	C	C	C	C	C	C	C	C	C	C	C	C	C	C	C	C	C	C	C	snp
	P104	F1	not variable	13987219	15477825	C	C	C	C	C	C	C	C	C	C	C	C	C	C	C	C	C	C	C	C	C	C	C	C	C	C	C	C	C	C	C	C	C	C	C	C	C	C	snp			7404	UTY
	P91	F1	not variable	13359993	14850599	C	C	C	C	C	C	C	C	C	C	C	C	C	C	C	C	C	C	C	C	C	C	C	C	C	C	C	C	C	C	C	C	C	C	C	C	C	C	snp		CpG	8287	USP9Y
	M427	F2	not variable	17601991	19092597	G	G	G	G	G	G	G	G	G	G	G	G	G	G	G	G	G	G	G	G	G	G	G	G	G	G	G	G	G	G	G	G	G	G	G	G	G	G	snp
	M428	F2	not variable	17601953	19092559	C	C	C	C	C	C	C	C	C	C	C	C	C	C	C	C	C	C	C	C	C	C	C	C	C	C	C	C	C	C	C	C	C	C	C	C	C	C	snp
	P96	F3	not variable	13379137	14869743	C	T	C	C	C	C	C	C	C	C	C	C	C	C	C	C	C	C	C	C	C	C	C	C	C	C	C	C	C	C	C	C	C	C	C	C	C	C	snp			8287	USP9Y
	M285	G1	not variable	21151128	22741740	G	G	G	G	G	G	G	G	G	G	G	G	G	G	G	G	G	G	G	G	G	G	G	G	G	G	G	G	G	G	G	G	G	G	G	G	G	G	snp	rs13447378		9086	EIF1AY
	M342	G1	not variable	21653330	23243942	C	C	C	C	C	C	C	C	C	C	C	C	C	C	C	C	C	C	C	C	C	C	C	C	C	C	C	C	C	C	C	C	C	C	C	C	C	C	snp
	M286	G2a2	not variable	21151187	22741799	G	G	G	G	G	G	G	G	G	G	G	G	G	G	G	G	G	G	G	G	G	G	G	G	G	G	G	G	G	G	G	G	G	G	G	G	G	G	snp	rs13447379		9086	EIF1AY
	U16	G2a3a	not variable	21327383	22917995	C	C	C	C	C	C	C	C	C	C	C	C	C	C	C	C	C	C	C	C	C	C	C	C	C	C	C	C	C	C	C	C	C	C	C	C	C	C	snp
	U1	G2a3b	not variable	13568272	15058878	G	A	A	A	A	A	A	A	A	A	A	A	A	A	A	A	A	A	A	A	A	A	A	A	A	A	A	A	A	A	A	A	A	A	A	A	A	A	snp
	U13	G2a3b1	not variable	13208948	14698928	T	C	C	C	C	C	C	C	C	C	C	C	C	C	C	C	C	C	C	C	C	C	C	C	C	C	C	C	C	C	C	C	C	C	C	C	C	C	snp
	M287	G2b	not variable	21151158	22741770	A	A	A	A	A	A	A	A	A	A	A	A	A	A	A	A	A	A	A	A	A	A	A	A	A	A	A	A	A	A	A	A	A	A	A	A	A	A	snp	rs13447380		9086	EIF1AY
	M377	G2c	not variable	13536827	15027433	A	A	G	A	A	A	A	A	A	A	A	A	A	A	A	A	A	A	A	A	A	A	A	A	A	A	A	A	A	A	A	A	A	A	A	A	A	A	snp			8653	DDX3Y
	M69	H	not variable	20353446	21894058	T	T	T	T	T	T	T	T	T	T	T	T	T	T	T	T	T	T	T	T	T	T	T	T	T	T	T	T	T	T	T	T	T	T	T	T	T	T	snp	rs2032673		8284	KDM5D
	M52	H1	not variable	20212587	21753199	A	A	A	A	A	A	A	A	A	A	A	A	A	A	A	A	A	A	A	A	A	A	A	A	A	A	A	A	A	A	A	A	A	A	A	A	A	A	snp
	M82	H1a	not variable	20353563	21894175	AT	AT	AT	AT	AT	AT	AT	AT	AT	AT	AT	AT	AT	AT	AT	AT	AT	AT	AT	AT	AT	AT	AT	AT	AT	AT	AT	AT	AT	AT	AT	AT	AT	AT	AT	AT	AT	AT	2bp del	rs2032675		8284	KDM5D
	M197	H1a1	not variable	13534992	15025598	T	T	T	T	T	T	T	T	T	T	T	T	T	T	T	T	T	T	T	T	T	T	T	T	T	T	T	T	T	T	T	T	T	T	T	T	T	T	snp	rs2032610		8653	DDX3Y
	M36	H1a1	not variable	20210397	21751009	T	C	T	T	T	T	T	T	T	T	T	T	T	T	T	T	T	T	T	T	T	T	T	T	T	T	T	T	T	T	T	T	T	T	T	T	T	T	snp				TXLNG2P
	M505	H1a1	not variable	20376501	21917113	A	A	A	A	A	A	A	A	A	A	A	A	A	A	A	A	A	A	A	A	A	A	A	A	A	A	A	A	A	A	A	A	A	A	A	A	A	A	snp
	M97	H1a2	not variable	20238101	21778713	A	A	A	A	A	A	A	A	A	A	A	A	A	A	A	A	A	A	A	A	A	A	A	A	A	A	A	A	A	A	A	A	A	A	A	A	A	A	snp
	M138	H1a3	not variable	20172243	21712855	G	G	G	G	G	G	G	G	G	G	G	G	G	G	G	G	G	G	G	G	G	G	G	G	G	G	G	G	G	G	G	G	G	G	G	G	G	G	snp
	M39	H1a3	not variable	20201636	21742248	C	C	C	C	C	C	C	C	C	C	C	C	C	C	C	C	C	C	C	C	C	C	C	C	C	C	C	C	C	C	C	C	C	C	C	C	C	C	C del				TXLNG2P
	M370	H1b	not variable	2948598	2888598	C	C	C	C	C	C	C	C	C	C	C	C	C	C	C	C	C	C	C	C	C	C	C	C	C	C	C	C	C	C	C	C	C	C	C	C	C	C	snp
	Apt	H2	not variable	21905719	23496331	C	C	C	C	C	C	C	C	C	C	C	C	C	C	C	C	C	C	C	C	C	C	C	C	C	C	C	C	C	C	C	C	C	C	C	C	C	C	snp
	P80	H2a	not variable	6799899	6739899	C	C	C	C	C	C	C	C	C	C	C	C	C	C	C	C	C	C	C	C	C	C	C	C	C	C	C	C	C	C	C	C	C	C	C	C	C	C	snp			266	AMELY
	P266	H2b	not variable	6799738	6739738	T	C	T	T	T	T	T	T	T	T	T	T	T	T	T	T	T	T	T	T	T	T	T	T	T	T	T	T	T	T	T	T	T	T	T	T	T	T	snp		CpG	266	AMELY
	M21	I1a	not variable	20191727	21732339	A	A	A	A	A	A	A	A	A	A	A	A	A	A	A	A	A	A	A	A	A	A	A	A	A	A	A	A	A	A	A	A	A	A	A	A	A	A	snp	rs3912			TXLNG2P
	M227	I1b	not variable	14100840	15591446	C	C	C	C	C	C	C	C	C	C	C	C	C	C	C	C	C	C	C	C	C	C	C	C	C	C	C	C	C	C	C	C	C	C	C	C	C	C	snp	rs9341274		7404	UTY
	M72	I1b1	not variable	20353795	21894407	A	A	A	A	A	A	A	A	A	A	A	A	A	A	A	A	A	A	A	A	A	A	A	A	A	A	A	A	A	A	A	A	A	A	A	A	A	A	snp	rs2032637		8284	KDM5D
	P109	I1c	not variable	13935399	15426005	C	C	C	C	C	C	C	C	C	C	C	C	C	C	C	C	C	C	C	C	C	C	C	C	C	C	C	C	C	C	C	C	C	C	C	C	C	C	snp			7404	UTY
	P259	I1d	not variable	14100868	15591474	T	T	T	T	T	T	T	T	T	T	T	T	T	T	T	T	T	T	T	T	T	T	T	T	T	T	T	T	T	T	T	T	T	T	T	T	T	T	snp			7404	UTY
	P215=M438	I2	not variable	15148198	16638804	A	A	A	A	A	A	A	A	A	A	A	A	A	A	A	A	A	A	A	A	A	A	A	A	A	A	A	A	A	A	A	A	A	A	A	A	A	A	snp	rs17307294		22829	NLGN4Y
	M26	I2a2	not variable	20325209	21865821	G	G	G	G	G	G	G	G	G	G	G	G	G	G	G	G	G	G	G	G	G	G	G	G	G	G	G	G	G	G	G	G	G	G	G	G	G	G	snp	rs2032629	CpG	8284	KDM5D
	M161	I2a2a	not variable	20176903	21717515	G	G	G	G	G	G	G	G	G	G	G	G	G	G	G	G	G	G	G	G	G	G	G	G	G	G	G	G	G	G	G	G	G	G	G	G	G	G	snp
	M223	I2b	not variable	20176695	21717307	G	A	G	G	G	G	G	G	G	G	G	G	G	G	G	G	G	G	G	G	G	G	G	G	G	G	G	G	G	G	G	G	G	G	G	G	G	G	snp
	P214=M436	I2b	not variable	17256887	18747493	G	G	G	G	G	G	G	G	G	G	G	G	G	G	G	G	G	G	G	G	G	G	G	G	G	G	G	G	G	G	G	G	G	G	G	G	G	G	snp	rs17315680
	P216	I2b	not variable	12502338	13992338	C	C	C	C	C	C	C	C	C	C	C	C	C	C	C	C	C	C	C	C	C	C	C	C	C	C	C	C	C	C	C	C	C	C	C	C	C	C	snp	rs17306657
	P218	I2b	not variable	16003024	17493630	T	T	T	T	T	T	T	T	T	T	T	T	T	T	T	T	T	T	T	T	T	T	T	T	T	T	T	T	T	T	T	T	T	T	T	T	T	T	snp	rs7067532
	P219	I2b	not variable	14027245	15517851	T	T	T	T	T	T	T	T	T	T	T	T	T	T	T	T	T	T	T	T	T	T	T	T	T	T	T	T	T	T	T	T	T	T	T	T	T	T	snp	rs17221964		7404	UTY
	P223	I2b	not variable	15208728	16699334	C	C	C	C	C	C	C	C	C	C	C	C	C	C	C	C	C	C	C	C	C	C	C	C	C	C	C	C	C	C	C	C	C	C	C	C	C	C	snp	rs17222244		22829	NLGN4Y
	U250=P222	I2b	not variable	17397594	18888200	C	C	C	C	C	C	C	C	C	C	C	C	C	C	C	C	C	C	C	C	C	C	C	C	C	C	C	C	C	C	C	C	C	C	C	C	C	C	snp	rs17315723
	M379	I2b2	not variable	13536922	15027528	G	G	G	G	G	G	G	G	G	G	G	G	G	G	G	G	G	G	G	G	G	G	G	G	G	G	G	G	G	G	G	G	G	G	G	G	G	G	snp			8653	DDX3Y
	P78	I2b3	not variable	6800387	6740387	G	G	G	G	G	G	G	G	G	G	G	G	G	G	G	G	G	G	G	G	G	G	G	G	G	G	G	G	G	G	G	G	G	G	G	G	G	G	snp		CpG	266	AMELY
	P95	I2b4	not variable	13379100	14869706	G	G	G	G	G	G	G	G	G	G	G	G	G	G	G	G	G	G	G	G	G	G	G	G	G	G	G	G	G	G	G	G	G	G	G	G	G	G	snp		CpG	8287	USP9Y
	M304	J	not variable	21159241	22749853	A	A	A	A	A	A	A	A	A	A	A	A	A	A	A	A	A	A	A	A	A	A	A	A	A	A	A	A	A	A	A	A	A	A	A	A	A	A	snp	rs13447352		9086	EIF1AY
	P209	J	not variable	17688729	19179335	T	T	T	T	T	T	T	T	T	T	T	T	T	T	T	T	T	T	T	T	T	T	T	T	T	T	T	T	T	T	T	T	T	T	T	T	T	T	snp	rs17315835
	M267	J1	not variable	21151206	22741818	T	T	T	T	T	T	T	T	T	T	T	T	T	T	T	T	T	T	T	T	T	T	T	T	T	T	T	T	T	T	T	T	T	T	T	T	T	T	snp	rs9341313		9086	EIF1AY
	M365/M390	J1b/J1c	not variable	2948678	2888678	A	A	A	A	A	A	A	A	A	A	A	A	A	A	A	A	A	A	A	A	A	A	A	A	A	A	A	A	A	A	A	A	A	A	A	A	A	A	A ins
	P56	J1d	not variable	12997346	14487338	A	A	A	A	A	A	A	A	A	A	A	A	A	A	A	A	A	A	A	A	A	A	A	A	A	A	A	A	A	A	A	A	A	A	A	A	A	A	snp				GYG2P1
	P58	J1e	not variable	12996675	14486667	T	T	T	T	T	T	T	T	T	T	T	T	T	T	T	T	T	T	T	T	T	T	T	T	T	T	T	T	T	T	T	T	T	T	T	T	T	T	snp	rs34043621			GYG2P1
	M367	J1e1	not variable	2948628	2888628	A	A	A	A	A	A	A	A	A	A	A	A	A	A	A	A	A	A	A	A	A	A	A	A	A	A	A	A	A	A	A	A	A	A	A	A	A	A	snp
	M369	J1e2	not variable	2948477	2888477	G	G	G	G	G	G	G	G	G	G	G	G	G	G	G	G	G	G	G	G	G	G	G	G	G	G	G	G	G	G	G	G	G	G	G	G	G	G	snp
	M172	J2	not variable	13479028	14969634	T	T	T	T	T	T	T	T	T	T	T	T	T	T	T	T	T	T	T	T	T	T	T	T	T	T	T	T	T	T	T	T	T	T	T	T	T	T	snp	rs2032604		8287	USP9Y
	M410	J2a	not variable	2811678	2751678	A	A	A	A	A	A	A	A	A	A	A	A	A	A	A	A	A	A	A	A	A	A	A	A	A	A	A	A	A	A	A	A	A	A	A	A	A	A	snp
	M322	J2a1	not variable	13979134	15469740	C	C	C	C	C	C	C	C	C	C	C	C	C	C	C	C	C	C	C	C	C	C	C	C	C	C	C	C	C	C	C	C	C	C	C	C	C	C	snp	rs13447376	CpG	7404	UTY
	M47	J2a1	not variable	20210718	21751330	G	G	G	G	G	G	G	G	G	G	G	G	G	G	G	G	G	G	G	G	G	G	G	G	G	G	G	G	G	G	G	G	G	G	G	G	G	G	snp				TXLNG2P
	M340	J2a10	not variable	20338087	21878699	G	G	G	G	G	G	G	G	G	G	G	G	G	G	G	G	G	G	G	G	G	G	G	G	G	G	G	G	G	G	G	G	G	G	G	G	G	G	snp			8284	KDM5D
	P81	J2a12	not variable	6799856	6739856	G	G	G	G	G	G	G	G	G	G	G	G	G	G	G	G	G	G	G	G	G	G	G	G	G	G	G	G	G	G	G	G	G	G	G	G	G	G	snp			266	AMELY
	P279	J2a13	not variable	2941377	2881377	G	G	G	G	G	G	G	G	G	G	G	G	G	G	G	G	G	G	G	G	G	G	G	G	G	G	G	G	G	G	G	G	G	G	G	G	G	G	snp
	M67	J2a2	not variable	20338197	21878809	A	A	A	A	A	A	A	A	A	A	A	A	A	A	A	A	A	A	A	A	A	A	A	A	A	A	A	A	A	A	A	A	A	A	A	A	A	A	snp	rs2032628		8284	KDM5D
	M92	J2a2a	not variable	20363411	21904023	T	T	T	T	T	T	T	T	T	T	T	T	T	T	T	T	T	T	T	T	T	T	T	T	T	T	T	T	T	T	T	T	T	T	T	T	T	T	snp	rs2032648		8284	KDM5D
	M327	J2a2a1	not variable	20363475	21904087	T	T	T	T	T	T	T	T	T	T	T	T	T	T	T	T	T	T	T	T	T	T	T	T	T	T	T	T	T	T	T	T	T	T	T	T	T	T	snp			8284	KDM5D
	M163	J2a2b	not variable	20189745	21730357	A	A	A	A	A	A	A	A	A	A	A	A	A	A	A	A	A	A	A	A	A	A	A	A	A	A	A	A	A	A	A	A	A	A	A	A	A	A	snp				TXLNG2P
	M166	J2a2b	not variable	20224082	21764694	C	C	C	C	C	C	C	C	C	C	C	C	C	C	C	C	C	C	C	C	C	C	C	C	C	C	C	C	C	C	C	C	C	C	C	C	C	C	snp
	M68	J2a3	not variable	20338088	21878700	A	A	A	A	A	A	A	A	A	A	A	A	A	A	A	A	A	A	A	A	A	A	A	A	A	A	A	A	A	A	A	A	A	A	A	A	A	A	snp			8284	KDM5D
	M137	J2a4	not variable	20223846	21764458	A	A	A	A	A	A	A	A	A	A	A	A	A	A	A	A	A	A	A	A	A	A	A	A	A	A	A	A	A	A	A	A	A	A	A	A	A	A	snp
	M158	J2a5	not variable	20175754	21716366	C	C	C	C	C	C	C	C	C	C	C	C	C	C	C	C	C	C	C	C	C	C	C	C	C	C	C	C	C	C	C	C	C	C	C	C	C	C	snp
	M289	J2a6	not variable	20338096	21878708	G	G	G	G	G	G	G	G	G	G	G	G	G	G	G	G	G	G	G	G	G	G	G	G	G	G	G	G	G	G	G	G	G	G	G	G	G	G	snp	rs13447368		8284	KDM5D
	M318	J2a7	not variable	21154381	22744993	T	T	T	T	T	T	T	T	T	T	T	T	T	T	T	T	T	T	T	T	T	T	T	T	T	T	T	T	T	T	T	T	T	T	T	T	T	T	snp	rs13447372		9086	EIF1AY
	M319	J2a8	not variable	13977179	15467785	T	T	T	T	T	T	T	T	T	T	T	T	T	T	T	T	T	T	T	T	T	T	T	T	T	T	T	T	T	T	T	T	T	T	T	T	T	T	snp	rs13447373		7404	UTY
	M339	J2a9	not variable	2941367	2881367	T	T	T	T	T	T	T	T	T	T	T	T	T	T	T	T	T	T	T	T	T	T	T	T	T	T	T	T	T	T	T	T	T	T	T	T	T	T	snp
	M102	J2b	not variable	20385500	21926112	G	G	G	G	G	G	G	G	G	G	G	G	G	G	G	G	G	G	G	G	G	G	G	G	G	G	G	G	G	G	G	G	G	G	G	G	G	G	snp	rs2032608
	M221	J2b	not variable	13945710	15436316	G	G	G	G	G	G	G	G	G	G	G	G	G	G	G	G	G	G	G	G	G	G	G	G	G	G	G	G	G	G	G	G	G	G	G	G	G	G	snp	rs2032667		7404	UTY
	M314	J2b	not variable	21162467	22753079	A	A	A	A	A	A	A	A	A	A	A	A	A	A	A	A	A	A	A	A	A	A	A	A	A	A	A	A	A	A	A	A	A	A	A	A	A	A	snp	rs13447442		9086	EIF1AY
	M205	J2b1	not variable	14096903	15587509	T	T	T	T	T	T	T	T	T	T	T	T	T	T	T	T	T	T	T	T	T	T	T	T	T	T	T	T	T	T	T	T	T	T	T	T	T	T	snp	rs2032657		7404	UTY
	M241	J2b2	not variable	13527853	15018459	G	G	G	G	G	G	G	G	G	G	G	G	G	G	G	G	G	G	G	G	G	G	G	G	G	G	G	G	G	G	G	G	G	G	G	G	G	G	snp	rs8179022		8653	DDX3Y
	M280	J2b2b	not variable	20338150	21878762	G	G	G	G	G	G	G	G	G	G	G	G	G	G	G	G	G	G	G	G	G	G	G	G	G	G	G	G	G	G	G	G	G	G	G	G	G	G	snp	rs13447367		8284	KDM5D
	M321	J2b2c	not variable	13540272	15030878	C	C	C	C	C	C	C	C	C	C	C	C	C	C	C	C	C	C	C	C	C	C	C	C	C	C	C	C	C	C	C	C	C	C	C	C	C	C	snp	rs13447375		8653	DDX3Y
	P84	J2b2d	not variable	6799767	6739767	G	G	G	G	G	G	G	G	G	G	G	G	G	G	G	G	G	G	G	G	G	G	G	G	G	G	G	G	G	G	G	G	G	G	G	G	G	G	snp			266	AMELY
	M147	K1	not variable	20221470	21762082	A	A	A	A	A	A	A	A	A	A	A	A	A	A	A	A	A	A	A	A	A	A	A	A	A	A	A	A	A	A	A	A	A	A	A	A	A	A	T ins
	P60	K2	not variable	12994479	14484471	T	T	T	T	T	T	T	T	T	T	T	T	T	T	T	T	T	T	T	T	T	T	T	T	T	T	T	T	T	T	T	T	T	T	T	T	T	T	snp				GYG2P1
	P79	K3	not variable	6800377	6740377	A	A	A	A	A	A	A	A	A	A	A	A	A	A	A	A	A	A	A	A	A	A	A	A	A	A	A	A	A	A	A	A	A	A	A	A	A	A	snp			266	AMELY
	P261	K4	not variable	12502279	13992279	G	G	G	G	G	G	G	G	G	G	G	G	G	G	G	G	G	G	G	G	G	G	G	G	G	G	G	G	G	G	G	G	G	G	G	G	G	G	snp
	P263	K4	not variable	19625357	21165969	A	A	A	A	A	A	A	A	A	A	A	A	A	A	A	A	A	A	A	A	A	A	A	A	A	A	A	A	A	A	A	A	A	A	A	A	A	A	snp
	M11	L	not variable	20190035	21730647	A	A	A	A	A	A	A	A	A	A	A	A	A	A	A	A	A	A	A	A	A	A	A	A	A	A	A	A	A	A	A	A	A	A	A	A	A	A	snp	rs3902			TXLNG2P
	M185	L	not variable	13414253	14904859	C	T	C	C	C	C	C	C	C	C	C	C	C	C	C	C	C	C	C	C	C	C	C	C	C	C	C	C	C	C	C	C	C	C	C	C	C	C	snp	rs2032607		8287	USP9Y
	M20	L	not variable	20192842	21733454	A	A	A	A	A	A	A	A	A	A	A	A	A	A	A	A	A	A	A	A	A	A	A	A	A	A	A	A	A	A	A	A	A	A	A	A	A	A	snp	rs3911			TXLNG2P
	M22	L	not variable	13299557	14790163	A	A	A	A	A	A	A	A	A	A	A	A	A	A	A	A	A	A	A	A	A	A	A	A	A	A	A	A	A	A	A	A	A	A	A	A	A	A	snp	rs3913			TTTY15
	M295	L	not variable	21154439	22745051	T	T	T	T	T	T	T	T	T	T	T	T	T	T	T	T	T	T	T	T	T	T	T	T	T	T	T	T	T	T	T	T	T	T	T	T	T	T	snp	rs9341318		9086	EIF1AY
	M61	L	not variable	20210837	21751449	C	T	C	C	C	C	C	C	C	C	C	C	C	C	C	C	C	C	C	C	C	C	C	C	C	C	C	C	C	C	C	C	C	C	C	C	C	C	snp	rs34289137			TXLNG2P
	M27	L1	not variable	20199034	21739646	C	C	C	C	C	C	C	C	C	C	C	C	C	C	C	C	C	C	C	C	C	C	C	C	C	C	C	C	C	C	C	C	C	C	C	C	C	C	snp				TXLNG2P
	M76	L1	not variable	20216704	21757316	T	T	T	T	T	T	T	T	T	T	T	T	T	T	T	T	T	T	T	T	T	T	T	T	T	T	T	T	T	T	T	T	T	T	T	T	T	T	snp
	M317	L2	not variable	21164059	22754671	G	G	G	G	G	G	G	G	G	G	G	G	G	G	G	G	G	G	G	G	G	G	G	G	G	G	G	G	G	G	G	G	G	G	G	G	G	G	GA del	rs13447360		9086	EIF1AY
	M349	L2a	not variable	2953277	2893277	G	G	G	G	G	G	G	G	G	G	G	G	G	G	G	G	G	G	G	G	G	G	G	G	G	G	G	G	G	G	G	G	G	G	G	G	G	G	snp
	M274	L2b	not variable	21147189	22737801	C	C	C	C	C	C	C	C	C	C	C	C	C	C	C	C	C	C	C	C	C	C	C	C	C	C	C	C	C	C	C	C	C	C	C	C	C	C	snp	rs9341310		9086	EIF1AY
	M357	L3	not variable	2948252	2888252	C	C	C	C	C	C	C	C	C	C	C	C	C	C	C	C	C	C	C	C	C	C	C	C	C	C	C	C	C	C	C	C	C	C	C	C	C	C	snp
	PK3	L3a	not variable	21078913	22669525	T	T	T	T	T	T	T	T	T	T	T	T	T	T	T	T	T	T	T	T	T	T	T	T	T	T	T	T	T	T	T	T	T	T	T	T	T	T	snp				TTTY10
	M106	M1	not variable	20325812	21866424	A	A	A	A	A	A	A	A	A	A	A	A	A	A	A	A	A	A	A	A	A	A	A	A	A	A	A	A	A	A	A	A	A	A	A	A	A	A	snp	rs2032611		8284	KDM5D
	M186	M1	not variable	13432855	14923461	G	G	G	G	G	G	G	G	G	G	G	G	G	G	G	G	G	G	G	G	G	G	G	G	G	G	G	G	G	G	G	G	G	G	G	G	G	G	1 bp del	rs2032681		8287	USP9Y
	M189	M1	not variable	13455099	14945705	G	G	G	G	G	G	G	G	G	G	G	G	G	G	G	G	G	G	G	G	G	G	G	G	G	G	G	G	G	G	G	G	G	G	G	G	G	G	snp	rs2032606		8287	USP9Y
	M296	M1	not variable	21154509	22745121	C	C	C	C	C	C	C	C	C	C	C	C	C	C	C	C	C	C	C	C	C	C	C	C	C	C	C	C	C	C	C	C	C	C	C	C	C	C	snp	rs9341319		9086	EIF1AY
	M4	M1	not variable	2804628	2744628	T	T	T	T	T	T	T	T	T	T	T	T	T	T	T	T	T	T	T	T	T	T	T	T	T	T	T	T	T	T	T	T	T	T	T	T	T	T	snp	rs3895
	M5=P73	M1	not variable	20069334	21609946	C	C	C	C	C	C	C	C	C	C	C	C	C	C	C	C	C	C	C	C	C	C	C	C	C	C	C	C	C	C	C	C	C	C	C	C	C	C	snp	rs3896
	P51	M1a1	not variable	13002050	14492042	T	T	T	T	T	T	T	T	T	T	T	T	T	T	T	T	T	T	T	T	T	T	T	T	T	T	T	T	T	T	T	T	T	T	T	T	T	T	snp				GYG2P1
	P94	M1a2	not variable	13379075	14869681	G	G	G	G	G	G	G	G	G	G	G	G	G	G	G	G	G	G	G	G	G	G	G	G	G	G	G	G	G	G	G	G	G	G	G	G	G	G	snp			8287	USP9Y
	P87	M1b	not variable	13529113	15019719	A	A	A	A	A	A	A	A	A	A	A	A	A	A	A	A	A	A	A	A	A	A	A	A	A	A	A	A	A	A	A	A	A	A	A	A	A	A	snp			8653	DDX3Y
	M16	M1b1a	not variable	20069689	21610301	C	C	C	C	C	C	C	C	C	C	C	C	C	C	C	C	C	C	C	C	C	C	C	C	C	C	C	C	C	C	C	C	C	C	C	C	C	C	snp	rs3907
	M83	M1b1b	not variable	20332675	21873287	C	C	C	C	C	C	C	C	C	C	C	C	C	C	C	C	C	C	C	C	C	C	C	C	C	C	C	C	C	C	C	C	C	C	C	C	C	C	snp	rs2032641		8284	KDM5D
	M353	M2	not variable	15818661	17309267	G	G	G	G	G	G	G	G	G	G	G	G	G	G	G	G	G	G	G	G	G	G	G	G	G	G	G	G	G	G	G	G	G	G	G	G	G	G	snp
	M387	M2	not variable	2800274	2740274	T	T	T	T	T	T	T	T	T	T	T	T	T	T	T	T	T	T	T	T	T	T	T	T	T	T	T	T	T	T	T	T	T	T	T	T	T	T	snp
	SRY9138 =M177	M2a	not variable	2718869	2658869	G	G	G	G	G	G	G	G	G	G	G	G	G	G	G	G	G	G	G	G	G	G	G	G	G	G	G	G	G	G	G	G	G	G	G	G	G	G	snp
	P117	M3	not variable	13329087	14819693	G	A	G	G	G	G	G	G	G	G	G	G	G	G	G	G	G	G	G	G	G	G	G	G	G	G	G	G	G	G	G	G	G	G	G	G	G	G	snp			8287	USP9Y
	P118	M3	not variable	13529200	15019806	C	C	C	C	C	C	C	C	C	C	C	C	C	C	C	C	C	C	C	C	C	C	C	C	C	C	C	C	C	C	C	C	C	C	C	C	C	C	C del			8653	DDX3Y
	P43	N1b	not variable	20340361	21880973	G	G	G	G	G	G	G	G	G	G	G	G	G	G	G	G	G	G	G	G	G	G	G	G	G	G	G	G	G	G	G	G	G	G	G	G	G	G	snp			8284	KDM5D
	P63	N1b1	not variable	20303215	21843827	A	A	A	A	A	A	A	A	A	A	A	A	A	A	A	A	A	A	A	A	A	A	A	A	A	A	A	A	A	A	A	A	A	A	A	A	A	A	C ins
	P105	N1c	not variable	13932356	15422962	C	C	C	C	C	C	C	C	C	C	C	C	C	C	C	C	C	C	C	C	C	C	C	C	C	C	C	C	C	C	C	C	C	C	C	C	C	C	snp		CpG	7404	UTY
	Tat	N1c	not variable	13431977	14922583	T	T	T	T	T	T	T	T	T	T	T	T	T	T	T	T	T	T	T	T	T	T	T	T	T	T	T	T	T	T	T	T	T	T	T	T	T	T	snp	rs34442126		8287	USP9Y
	M178	N1c1	not variable	20201143	21741755	C	C	C	C	C	C	C	C	C	C	C	C	C	C	C	C	C	C	C	C	C	C	C	C	C	C	C	C	C	C	C	C	C	C	C	C	C	C	snp				TXLNG2P
	P119	N1c1c	not variable	13435650	14926256	G	G	G	G	G	G	G	G	G	G	G	G	G	G	G	G	G	G	G	G	G	G	G	G	G	G	G	G	G	G	G	G	G	G	G	G	G	G	snp			8287	USP9Y
	P191	O	not variable	13924509	15415115	A	A	A	A	A	A	A	A	A	A	A	A	A	A	A	A	A	A	A	A	A	A	A	A	A	A	A	A	A	A	A	A	A	A	A	A	A	A	snp	rs16980601		7404	UTY
	P196	O	not variable	14263707	15754313	C	C	C	C	C	C	C	C	C	C	C	C	C	C	C	C	C	C	C	C	C	C	C	C	C	C	C	C	C	C	C	C	C	C	C	C	C	C	snp	rs917759
	M119	O1a	not variable	20222073	21762685	T	T	T	T	T	T	T	T	T	T	T	T	T	T	T	T	T	T	T	T	T	T	T	T	T	T	T	T	T	T	T	T	T	T	T	T	T	T	snp
	M101	O1a1a	not variable	20176860	21717472	G	G	G	G	G	G	G	G	G	G	G	G	G	G	G	G	G	G	G	G	G	G	G	G	G	G	G	G	G	G	G	G	G	G	G	G	G	G	snp
	M103	O1a2	not variable	20395526	21936138	C	C	C	C	C	C	C	C	C	C	C	C	C	C	C	C	C	C	C	C	C	C	C	C	C	C	C	C	C	C	C	C	C	C	C	C	C	C	snp	rs2032609
	M110	O1a2	not variable	20366485	21907097	T	T	T	T	T	T	T	T	T	T	T	T	T	T	T	T	T	T	T	T	T	T	T	T	T	T	T	T	T	T	T	T	T	T	T	T	T	T	snp
	M50	O1a2	not variable	20328060	21868672	T	T	T	T	T	T	T	T	T	T	T	T	T	T	T	T	T	T	T	T	T	T	T	T	T	T	T	T	T	T	T	T	T	T	T	T	T	T	snp	rs2032632		8284	KDM5D
	P31	O2	not variable	13005251	14495243	T	T	T	T	T	T	T	T	T	T	T	T	T	T	T	T	T	T	T	T	T	T	T	T	T	T	T	T	T	T	T	T	T	T	T	T	T	T	snp				GYG2P1
	M95	O2a	not variable	20397832	21938444	C	C	C	C	C	C	C	C	C	C	C	C	C	C	C	C	C	C	C	C	C	C	C	C	C	C	C	C	C	C	C	C	C	C	C	C	C	C	snp	rs2032650
	M88	O2a1	not variable	20360237	21900849	A	A	A	A	A	A	A	A	A	A	A	A	A	A	A	A	A	A	A	A	A	A	A	A	A	A	A	A	A	A	A	A	A	A	A	A	A	A	snp	rs2032645		8284	KDM5D
	PK4	O2a1a	not variable	19745350	21285962	A	A	A	A	A	A	A	A	A	A	A	A	A	A	A	A	A	A	A	A	A	A	A	A	A	A	A	A	A	A	A	A	A	A	A	A	A	A	snp
	P49	O2b	not variable	13006415	14496407	A	A	A	A	A	A	A	A	A	A	A	A	A	A	A	A	A	A	A	A	A	A	A	A	A	A	A	A	A	A	A	A	A	A	A	A	A	A	snp				GYG2P1
	SRY465	O2b	not variable	2715180	2655180	G	G	G	G	G	G	G	G	G	G	G	G	G	G	G	G	G	G	G	G	G	G	G	G	G	G	G	G	G	G	G	G	G	G	G	G	G	G	snp	rs11575897	CpG	6736	SRY
	M122	O3	not variable	20224062	21764674	A	A	A	A	A	A	A	A	A	A	A	A	A	A	A	A	A	A	A	A	A	A	A	A	A	A	A	A	A	A	A	A	A	A	A	A	A	A	snp
	P198	O3	not variable	15563165	17053771	C	C	C	C	C	C	C	C	C	C	C	C	C	C	C	C	C	C	C	C	C	C	C	C	C	C	C	C	C	C	C	C	C	C	C	C	C	C	snp	rs17269816
	M324	O3a	not variable	2881786	2821786	G	G	G	G	G	G	G	G	G	G	G	G	G	G	G	G	G	G	G	G	G	G	G	G	G	G	G	G	G	G	G	G	G	G	G	G	G	G	snp	rs13447361		7544	ZFY
	P197	O3a	not variable	17688857	19179463	G	G	G	G	G	G	G	G	G	G	G	G	G	G	G	G	G	G	G	G	G	G	G	G	G	G	G	G	G	G	G	G	G	G	G	G	G	G	snp	rs17276358
	P199	O3a	not variable	17156436	18647042	A	A	A	A	A	A	A	A	A	A	A	A	A	A	A	A	A	A	A	A	A	A	A	A	A	A	A	A	A	A	A	A	A	A	A	A	A	A	snp	rs17269928
	P200	O3a	not variable	17069399	18560005	T	T	T	T	T	T	T	T	T	T	T	T	T	T	T	T	T	T	T	T	T	T	T	T	T	T	T	T	T	T	T	T	T	T	T	T	T	T	snp	rs17316592
	P93	O3a	not variable	13378896	14869502	C	T	C	C	C	C	C	C	C	C	C	C	C	C	C	C	C	C	C	C	C	C	C	C	C	C	C	C	C	C	C	C	C	C	C	C	C	C	snp	rs34248257		8287	USP9Y
	M164	O3a2	not variable	20216694	21757306	T	T	T	T	T	T	T	T	T	T	T	T	T	T	T	T	T	T	T	T	T	T	T	T	T	T	T	T	T	T	T	T	T	T	T	T	T	T	snp
	P201=IMSJST021354	O3a3	not variable	2888196	2828196	T	T	T	T	T	T	T	T	T	T	T	T	T	T	T	T	T	T	T	T	T	T	T	T	T	T	T	T	T	T	T	T	T	T	T	T	T	T	snp	rs2267801		7544	ZFY
	M159	O3a3a	not variable	20210828	21751440	A	A	A	A	A	A	A	A	A	A	A	A	A	A	A	A	A	A	A	A	A	A	A	A	A	A	A	A	A	A	A	A	A	A	A	A	A	A	snp				TXLNG2P
	M113	O3a3b1	not variable	20227521	21768133	T	T	T	T	T	T	T	T	T	T	T	T	T	T	T	T	T	T	T	T	T	T	T	T	T	T	T	T	T	T	T	T	T	T	T	T	T	T	snp
	M188	O3a3b1	not variable	13434263	14924869	C	C	C	C	C	C	C	C	C	C	C	C	C	C	C	C	C	C	C	C	C	C	C	C	C	C	C	C	C	C	C	C	C	C	C	C	C	C	snp	rs2032605	CpG	8287	USP9Y
	M209	O3a3b1	not variable	14085184	15575790	A	A	A	A	A	A	A	A	A	A	A	A	A	A	A	A	A	A	A	A	A	A	A	A	A	A	A	A	A	A	A	A	A	A	A	A	A	A	snp	rs2032661		7404	UTY
	N4	O3a3b1a	not variable	20397920	21938532	A	A	A	A	A	A	A	A	A	A	A	A	A	A	A	A	A	A	A	A	A	A	A	A	A	A	A	A	A	A	A	A	A	A	A	A	A	A	snp	rs3212290
	N5	O3a3b1b	not variable	13360932	14851538	T	T	T	T	T	T	T	T	T	T	T	T	T	T	T	T	T	T	T	T	T	T	T	T	T	T	T	T	T	T	T	T	T	T	T	T	T	T	snp	rs3212292		8287	USP9Y
	P164	O3a3b2	not variable	12511232	14001232	A	A	A	A	A	A	A	A	A	A	A	A	A	A	A	A	A	A	A	A	A	A	A	A	A	A	A	A	A	A	A	A	A	A	A	A	A	A	snp	rs17316007
	M134	O3a3c	not variable	20175606	21716218	C	C	C	C	C	C	C	C	C	C	C	C	C	C	C	C	C	C	C	C	C	C	C	C	C	C	C	C	C	C	C	C	C	C	C	C	C	C	1bp del
	M133	O3a3c1	not variable	20175715	21716327	A	A	A	A	A	A	A	A	A	A	A	A	A	A	A	A	A	A	A	A	A	A	A	A	A	A	A	A	A	A	A	A	A	A	A	A	A	A	T del
	P101	O3a3c2	not variable	20362006	21902618	C	C	C	C	C	C	C	C	C	C	C	C	C	C	C	C	C	C	C	C	C	C	C	C	C	C	C	C	C	C	C	C	C	C	C	C	C	C	snp			8284	KDM5D
	P103	O3a4a	not variable	13987225	15477831	C	C	C	C	C	C	C	C	C	C	C	C	C	C	C	C	C	C	C	C	C	C	C	C	C	C	C	C	C	C	C	C	C	C	C	C	C	C	snp			7404	UTY
	M300	O3a5	not variable	21158586	22749198	G	G	G	G	G	G	G	G	G	G	G	G	G	G	G	G	G	G	G	G	G	G	G	G	G	G	G	G	G	G	G	G	G	G	G	G	G	G	snp	rs13447348		9086	EIF1AY
	M333	O3a6	not variable	13356860	14847466	T	T	T	T	T	T	T	T	T	T	T	T	T	T	T	T	T	T	T	T	T	T	T	T	T	T	T	T	T	T	T	T	T	T	T	T	T	T	G ins			8287	USP9Y
	M120	Q1a1	not variable	20366782	21907394	T	T	T	T	T	T	T	T	T	T	T	T	T	T	T	T	T	T	T	T	T	T	T	T	T	T	T	T	T	T	T	T	T	T	T	T	T	T	snp
	N14	Q1a1	not variable	13540044	15030650	C	C	C	C	C	C	C	C	C	C	C	C	C	C	C	C	C	C	C	C	C	C	C	C	C	C	C	C	C	C	C	C	C	C	C	C	C	C	snp	rs3212294		8653	DDX3Y
	M143	Q1a2	not variable	20349206	21889818	G	G	G	G	G	G	G	G	G	G	G	G	G	G	G	G	G	G	G	G	G	G	G	G	G	G	G	G	G	G	G	G	G	G	G	G	G	G	snp			8284	KDM5D
	M25	Q1a2	not variable	20326052	21866664	G	G	G	G	G	G	G	G	G	G	G	G	G	G	G	G	G	G	G	G	G	G	G	G	G	G	G	G	G	G	G	G	G	G	G	G	G	G	snp			8284	KDM5D
	M19	Q1a3a1	not variable	20192619	21733231	T	T	T	T	T	T	T	T	T	T	T	T	T	T	T	T	T	T	T	T	T	T	T	T	T	T	T	T	T	T	T	T	T	T	T	T	T	T	snp	rs3910			TXLNG2P
	M194	Q1a3a2	not variable	13523944	15014550	T	T	T	T	T	T	T	T	T	T	T	T	T	T	T	T	T	T	T	T	T	T	T	T	T	T	T	T	T	T	T	T	T	T	T	T	T	T	snp	rs2032677
	M199	Q1a3a3	not variable	13540504	15031110	G	G	G	G	G	G	G	G	G	G	G	G	G	G	G	G	G	G	G	G	G	G	G	G	G	G	G	G	G	G	G	G	G	G	G	G	G	G	G ins	rs2032589		8653	DDX3Y
	P106	Q1a3a3	not variable	13932316	15422922	C	C	C	C	C	C	C	C	C	C	C	C	C	C	C	C	C	C	C	C	C	C	C	C	C	C	C	C	C	C	C	C	C	C	C	C	C	C	snp		CpG	7404	UTY
	SA01	Q1a3a4	not variable	13524110	15014716	C	C	C	C	C	C	C	C	C	C	C	C	C	C	C	C	C	C	C	C	C	C	C	C	C	C	C	C	C	C	C	C	C	C	C	C	C	C	snp		CpG
	P48	Q1a4	not variable	13006660	14496652	T	T	T	T	T	T	T	T	T	T	T	T	T	T	T	T	T	T	T	T	T	T	T	T	T	T	T	T	T	T	T	T	T	T	T	T	T	T	T ins				GYG2P1
	P89	Q1a5	not variable	13359859	14850465	G	G	G	G	G	G	G	G	G	G	G	G	G	G	G	G	G	G	G	G	G	G	G	G	G	G	G	G	G	G	G	G	G	G	G	G	G	G	snp			8287	USP9Y
	M323	Q1a6	not variable	20327106	21867718	C	A	C	C	C	C	C	C	C	C	C	C	C	C	C	C	C	C	C	C	C	C	C	C	C	C	C	C	C	C	C	C	C	C	C	C	C	C	snp	rs13447377		8284	KDM5D
	M378	Q1b	not variable	13536901	15027507	A	A	A	A	A	A	A	A	A	A	A	A	A	A	A	A	A	A	A	A	A	A	A	A	A	A	A	A	A	A	A	A	A	A	A	A	A	A	snp			8653	DDX3Y
	M56	R1a1a	not variable	20332274	21872886	A	A	A	A	A	A	A	A	A	A	A	A	A	A	A	A	A	A	A	A	A	A	A	A	A	A	A	A	A	A	A	A	A	A	A	A	A	A	snp	rs2032622		8284	KDM5D
	M157	R1a1b	not variable	20327242	21867854	A	A	A	A	A	A	A	A	A	A	A	A	A	A	A	A	A	A	A	A	A	A	A	A	A	A	A	A	A	A	A	A	A	A	A	A	A	A	snp			8284	KDM5D
	M204	R1a1c	not variable	14100595	15591201	T	T	T	T	T	T	T	T	T	T	T	T	T	T	T	T	T	T	T	T	T	T	T	T	T	T	T	T	T	T	T	T	T	T	T	T	T	T	snp	rs2032655		7404	UTY
	M87	R1a1c	not variable	20365497	21906109	T	T	T	T	T	T	T	T	T	T	T	T	T	T	T	T	T	T	T	T	T	T	T	T	T	T	T	T	T	T	T	T	T	T	T	T	T	T	snp	rs2032644		8284	KDM5D
	P98	R1a1d	not variable	13395751	14886357	C	C	C	C	C	C	C	C	C	C	C	C	C	C	C	C	C	C	C	C	C	C	C	C	C	C	C	C	C	C	C	C	C	C	C	C	C	C	snp		CpG	8287	USP9Y
	PK5	R1a1e	not variable	21717383	23307995	C	C	C	C	C	C	C	C	C	C	C	C	C	C	C	C	C	C	C	C	C	C	C	C	C	C	C	C	C	C	C	C	C	C	C	C	C	C	snp
	M37	R1b1b2a	not variable	20210939	21751551	C	C	C	C	C	C	C	C	C	C	C	C	C	C	C	C	C	C	C	C	C	C	C	C	C	C	C	C	C	C	C	C	C	C	C	C	C	C	snp				TXLNG2P
	M65	R1b1b2b	not variable	20365653	21906265	A	A	A	A	A	A	A	A	A	A	A	A	A	A	A	A	A	A	A	A	A	A	A	A	A	A	A	A	A	A	A	A	A	A	A	A	A	A	snp			8284	KDM5D
	M153	R1b1b2c	not variable	20165748	21706360	A	A	A	A	A	A	A	A	A	A	A	A	A	A	A	A	A	A	A	A	A	A	A	A	A	A	A	A	A	A	A	A	A	A	A	A	A	A	snp
	SRY2627=M167	R1b1b2d	not variable	2718271	2658271	G	G	G	G	G	G	G	G	G	G	G	G	G	G	G	G	G	G	G	G	G	G	G	G	G	G	G	G	G	G	G	G	G	G	G	G	G	G	snp
	USP9Y+3636=M222	R1b1b2e	not variable	13411808	14902414	G	G	G	G	G	G	G	G	G	G	G	G	G	G	G	G	G	G	G	G	G	G	G	G	G	G	G	G	G	G	G	G	G	G	G	G	G	G	snp	rs20321		8287	USP9Y
	U198=M467	R1b1b2g1	not variable	15348893	16839499	G	G	G	G	G	G	G	G	G	G	G	G	G	G	G	G	G	G	G	G	G	G	G	G	G	G	G	G	G	G	G	G	G	G	G	G	G	G	snp	rs17222279		22829	NLGN4Y
	P107	R1b1b2g2	not variable	13329287	14819893	G	G	G	G	G	G	G	G	G	G	G	G	G	G	G	G	G	G	G	G	G	G	G	G	G	G	G	G	G	G	G	G	G	G	G	G	G	G	snp		CpG	8287	USP9Y
	M160	R1b1b2h2	not variable	20348253	21888865	A	A	A	A	A	A	A	A	A	A	A	A	A	A	A	A	A	A	A	A	A	A	A	A	A	A	A	A	A	A	A	A	A	A	A	A	A	A	snp			8284	KDM5D
	M335	R1b1c	not variable	13535789	15026395	T	T	T	T	T	T	T	T	T	T	T	T	T	T	T	T	T	T	T	T	T	T	T	T	T	T	T	T	T	T	T	T	T	T	T	T	T	T	snp			8653	DDX3Y
	M230	S	not variable	13990766	15481372	T	T	T	T	T	T	T	T	T	T	T	T	T	T	T	T	T	T	T	T	T	T	T	T	T	T	T	T	T	T	T	T	T	T	T	T	T	T	snp	rs9341277		7404	UTY
	P202	S	not variable	12511024	14001024	T	T	T	T	T	T	T	T	T	T	T	T	T	T	T	T	T	T	T	T	T	T	T	T	T	T	T	T	T	T	T	T	T	T	T	T	T	T	snp
	M254	S1	not variable	13532156	15022762	C	C	C	C	C	C	C	C	C	C	C	C	C	C	C	C	C	C	C	C	C	C	C	C	C	C	C	C	C	C	C	C	C	C	C	C	C	C	18 bp ins	rs9341297		8653	DDX3Y
	P57	S1a	not variable	12997074	14487066	T	T	T	T	T	T	T	T	T	T	T	T	T	T	T	T	T	T	T	T	T	T	T	T	T	T	T	T	T	T	T	T	T	T	T	T	T	T	snp				GYG2P1
	P61	S1b	not variable	12992202	14482194	G	G	G	G	G	G	G	G	G	G	G	G	G	G	G	G	G	G	G	G	G	G	G	G	G	G	G	G	G	G	G	G	G	G	G	G	G	G	snp		CpG		GYG2P1
	P83	S1c	not variable	6799772	6739772	G	G	G	G	G	G	G	G	G	G	G	G	G	G	G	G	G	G	G	G	G	G	G	G	G	G	G	G	G	G	G	G	G	G	G	G	G	G	snp		CpG	266	AMELY
	M226	S1d	not variable	14100841	15591447	C	C	C	C	C	C	C	C	C	C	C	C	C	C	C	C	C	C	C	C	C	C	C	C	C	C	C	C	C	C	C	C	C	C	C	C	C	C	snp	rs9341275		7404	UTY
	M184=USP9Y+3178	T	not variable	13407557	14898163	G	G	G	G	G	G	G	G	G	G	G	G	G	G	G	G	G	G	G	G	G	G	G	G	G	G	G	G	G	G	G	G	G	G	G	G	G	G	snp	rs20320		8287	USP9Y
	M193	T	not variable	13523899	15014505	A	A	A	A	A	A	A	A	A	A	A	A	A	A	A	A	A	A	A	A	A	A	A	A	A	A	A	A	A	A	A	A	A	A	A	A	A	A	4 bp ins	rs2032676
	M272	T	not variable	21148163	22738775	A	A	A	A	A	A	A	A	A	A	A	A	A	A	A	A	A	A	A	A	A	A	A	A	A	A	A	A	A	A	A	A	A	A	A	A	A	A	snp	rs9341308		9086	EIF1AY
	M70	T	not variable	20353269	21893881	A	A	A	A	A	A	A	A	A	A	A	A	A	A	A	A	A	A	A	A	A	A	A	A	A	A	A	A	A	A	A	A	A	A	A	A	A	A	snp	rs2032672		8284	KDM5D
	PS129	T	not variable	13981957	15472563	C	C	C	C	C	C	C	C	C	C	C	C	C	C	C	C	C	C	C	C	C	C	C	C	C	C	C	C	C	C	C	C	C	C	C	C	C	C	snp			7404	UTY
	PS78	T1	not variable	13358044	14848650	G	G	G	G	G	G	G	G	G	G	G	G	G	G	G	G	G	G	G	G	G	G	G	G	G	G	G	G	G	G	G	G	G	G	G	G	G	G	snp	rs34941773		8287	USP9Y
	M320/P292	T1/Q1a3a3	not variable	13540161	15030767	T	T	T	T	T	T	T	T	T	T	T	T	T	T	T	T	T	T	T	T	T	T	T	T	T	T	T	T	T	T	T	T	T	T	T	T	T	T	G ins	rs13447374		8653	DDX3Y
	PS2	T1a	not variable	6796443	6736443	C	C	C	C	C	C	C	C	C	C	C	C	C	C	C	C	C	C	C	C	C	C	C	C	C	C	C	C	C	C	C	C	C	C	C	C	C	C	snp			266	AMELY
	PS21	T1a	not variable	14528466	16019072	G	G	G	G	G	G	G	G	G	G	G	G	G	G	G	G	G	G	G	G	G	G	G	G	G	G	G	G	G	G	G	G	G	G	G	G	G	G	snp
	P330	T1a3	not variable	14528411	16019017	T	T	T	T	T	T	T	T	T	T	T	T	T	T	T	T	T	T	T	T	T	T	T	T	T	T	T	T	T	T	T	T	T	T	T	T	T	T	snp
	P321	T1a4	not variable	14528119	16018725	G	G	G	G	G	G	G	G	G	G	G	G	G	G	G	G	G	G	G	G	G	G	G	G	G	G	G	G	G	G	G	G	G	G	G	G	G	G	snp
	P317	T1a4a	not variable	14529767	16020373	C	C	C	C	C	C	C	C	C	C	C	C	C	C	C	C	C	C	C	C	C	C	C	C	C	C	C	C	C	C	C	C	C	C	C	C	C	C	snp
	L131	T1b	not variable	17882202	19372808	C	C	C	C	C	C	C	C	C	C	C	C	C	C	C	C	C	C	C	C	C	C	C	C	C	C	C	C	C	C	C	C	C	C	C	C	C	C	snp
	P322	T1b1	not variable	12510929	14000929	G	G	G	G	G	G	G	G	G	G	G	G	G	G	G	G	G	G	G	G	G	G	G	G	G	G	G	G	G	G	G	G	G	G	G	G	G	G	snp
	P328	T1b1	not variable	20303699	21844311	C	C	C	C	C	C	C	C	C	C	C	C	C	C	C	C	C	C	C	C	C	C	C	C	C	C	C	C	C	C	C	C	C	C	C	C	C	C	snp
	P327	T1b1a	not variable	17256799	18747405	T	T	T	T	T	T	T	T	T	T	T	T	T	T	T	T	T	T	T	T	T	T	T	T	T	T	T	T	T	T	T	T	T	T	T	T	T	T	snp
	P77	T2	not variable	13435596	14926202	G	G	G	G	G	G	G	G	G	G	G	G	G	G	G	G	G	G	G	G	G	G	G	G	G	G	G	G	G	G	G	G	G	G	G	G	G	G	snp			8287	USP9Y
[truncated: 17 more columns]
