# Supplementary material for: A calibrated human Y-chromosomal phylogeny based on resequencing
Source: HighWire-hosted journal article supplement (doi:10.1101/gr.143198.112), 2012-10-04
Supplement: Supplemental_Table7_IndelFlanks.docx [file Supplemental_Table7_IndelFlanks.docx]

Table S7. Sequence contexts of the indel calls. The indel position is represented by the red N.

>2691676

CATATGGAATAGTGCCACAGTGATCCAAGTACTAAGGGATGAGAGGAGAGTTTTTGTTTTTTGTTTTGTTTTGTTTTGTTTTTGTTTTTGTTTTTGTTTTNATCTGTTTTGATCTTGATCTGTTGCCCAGGCTGGAGTACAGTGGTGTGCTCACTGCAACATCTGCCTCCCAGGTTCAAGCAATTCTCCAGGCTCAGCCTC

>2694456

GGCTATCTGAACAAATTTCACAGAGAACTGGCCTTGGTCAAAGAACAAGCCTTGACACAGGGAAAGGAAGCACACACGTGCACACACACACACACACACANGCACATAATGCTGTCTACTGAATACAGTTTATAGTCATAATCATATAAAAACTGATATTTTTATATGGTCTGTTTTTTAAAAGGTTTTGTTATTTCTTTT

>2700534

AGATAGTGCAATACTGGCTCACATGCATATGTATATGCATGCAATACTGGCTCACAGATGCATATTGATAAAACAAAATTGTGAAGCCAGAAAAAAAAAANCTTCCCTTACCTGGTGAAAATGCCCTGTAGCATAATAATTTACTGTTATAACATCAACCCTCTTGCATGCTAAAGCTTTTATATAACCAGAAAACATGCA

>2707585

TCAGGTAACACAAGAGAGTGATCCTAGCTAATTGCCCTCAATTTCCAAGGAACTACAGGGAAACAGCCACTGAAAGACCAAAAAAGAAAAGAAAAAAAAANTTATAAAAGACCCAGATACCTTAAACAAACTGAGCAGTGGTGATTTGGTGCCTCCACACGGAAACTCCTAGATTCACTGCCCACAGCCAGAAACCTGCAG

>2707993

TCCTCTGCTACACTGTTTATGTAAAAATACAGACTCACTGAGCCAGACTATGAAAGTAATTGACTATTCCTCTACCCTTCCTGTTTTTTTTTTTTTTTTTNGACAGAGTTTCCAAAGCGATTCTCCTGCCTCAGCCTCCTGAGTAGCTGGGATTACAGGCATGTGCCAACACGCCCAGATAATTTTTGCATTTTTAGTAGA

>2730109

TGTTGAATTCCTGACCTCAGGTGATCTGCCTGCCTTGGCCTCCAAAAATGCAAGGATTACTGGCATGAGCCACCGTGCCTGGCATTTTTTTTTTTTTTTTNCCAAGACAAGAGTCTTGCTTTGTCACCCAGGCTGGAGTGCAGTGGCATGATTTCGGCTCACGGCAACCCCTGTCTCTGAGGTTTAAGCATTCTCTTGCTT

>2739674

ACCACACAAGCAATAAAAAGGAAAGCACTTCTAAAACATTGAGCAACATGAAAGAGTATCACTGAAGTGGTTTAGAGGAAAGAAAGCTAAACTCAAAAGANGTTACAATTTATATGTTGCCCAAGAACATAGCACTTACCTGTGGTACTCAGGTGTGAGCCAGTGTACCCGGCCTTCCTTGTTTTTTGATGTGTGTGTTCA

>2750855

GAATGGCATGAACCCGGGAGGCGGAGCTTGCAGTGAGCCGAGGCCACTACACTCCAGCCTGGGCTACAGAGCGAGACTCTGTCTCAAAAAAAAAAAAAAANGAATGCACTTTTTGGGAAAAAAAGCATTCAATTAATAAAGCCGTCAAGTGAAAACATGTTATATATTGACAGTAACATTTCACTAGTGGCTTTGGTATCT

>2769309

GGGCAACAGTGCGAGACTCCGTCTCAAAGAAAAAAAAAAAGAAACAAAGAGAGACATTATGTAATGGTAAAAAGCCTTGTCCAACAAGAAAATGTCACAANCCTAAACATATATGCACTGAACACTGGAGCTCTCAAATTTATAAAACAATTACTAATAGATCTAAGAAATGAGATAGACAGCAACACAATAGTAGTGGGG

>2773861

AATTGCTTGAACCTGGGAGATGGAAGTTACAGTGAGCAGAGATCGAGCCACCGCACTTCAGCCTGGGTGACACAGCGAGACTCCATCTCCAAAAAAAAAANGAAAAGGAAACTGTGGTAGATATGTATACACACAAAAAGGAATGAATTAACAGCATTTGCAGTGACCTGGATGAGATTGGAGACTATTACTCTAAGTGAA

>2777843

CTATTTAAATCTGTGGAGTGTTCCGAAACTCCAGTTATTTAGTGTTGGAAATAATTGATAGTTCACAATGGGTAGCTCCAGGAGTTAAAAAAAAAAAAAANGAGAGAGAGATAGAGACAGATATGAATTCAATGGTTGGACAATAGTTGGTGTTCAGAAAATTGAATAATTGGTAATTGATGTATTCAGATTTGTTTCTCT

>2783741

AGAAAAAAAAAAAAAAAGATTGATATTCATAATGTGTAAAATGTGTCTACAAAAAAAGGAGAAGGAAGAGCAACTCCAAAAAAAACAAACAAACAAAAAANAAAAAAAACAAGAACAACAACAACAAAGCAACAGGTTGTTCCAAGGAAATTTTCAGAAAAGAAAAATTGCATAGCTAATATACCACAAAGAAATTATAAA

>2783749

AAAAAAAAAGATTGATATTCATAATGTGTAAAATGTGTCTACAAAAAAAGGAGAAGGAAGAGCAACTCCAAAAAAAACAAACAAACAAAAAAAAAAAAAANCAAGAACAACAACAACAAAGCAACAGGTTGTTCCAAGGAAATTTTCAGAAAAGAAAAATTGCATAGCTAATATACCACAAAGAAATTATAAAATTAAAAC

>2788712

GGGGTGTTCCTATATTGGGTGCATAAATATTTATAATACTTAGCTCTTCTTGTAGCATGGATTCCTTTACCATGATGTAATGCCCTTCTTTGTCTTTTTTNGATCTTTGTTGGCTTAAAGTCTGTTTTATCAGAGACTAGGATTGGAACCCCTGCTTTTTTTTGCTGTCCATTTGTTTGGTAAATATTCCTCCATCCCTTT

>2810450

CAAATTTGCAATTTGCATTTTTTTTTTTTTTTTTTTTTTTGAGACGGGGCCTCTCTGCTGTTATCTAGGCTGTAGTGCCAGGGCTATTTTTTTTTTTTTTNAATTTTTTTTTGAGACAGGGTCTCACTTCTGTTACCCAGGCTGGAGTGCAGTGCCTGATCATGGCTCAATGCAGCCTTGACTTCCCGGGCTCACATGATC

>2814891

CACTTTGGGAGGCTGAAACGGGTGGATCACCTGAGGTCAGGAGTTTGAAACCACCCTGGCCAAACATGCTGAAACCCCATCTCTACTAAAAAAAAAAAAANTACGAAAAAAAATTAGCTGGGCTTGGTGGCGGGCACCTGTAATCCCAGCTACTCAGGAGACTGAGACGAGAATTGCTTGGAACCTGGAAAGTGGAGGTTG

>2823336

TTCTCCCTGCCACCATCTTCACCCCGGTTCTCAAATATGTCTCTGGCAAATGTAAAATAACATCCACCCTCTCTTAAAGTTCCCAGTCCAAAAAAAAAAANTCTTACCTGAAATTAATCAGCTCAGAAGTCCTAAGTATCATTTAAATCAGATGCTTATTCTCTGGGTATCAGTCATTAAGTGCAACTCCTGGGACATAAT

>2824736

GTGATGCCGGTGATGGGAAGTGGCTGTAAATACAGATGAGGCTTTGCTCTGACAAGGAATCTCCTTAATTTAACCTCCCCTTTCACCCCCACCCCCCCCCNGCCCCCAAGATGGACAGAAAACTTCTGATTTTGTCATGTTTTGCTATCTTTTTGTTTAATAAATATTCCAACTATTCATTTTTCTCACTGAATTTTACTC

>2835551

TTTGCACAGCTGTCTGAAAACCCACTGGTTTGTATGCTTTACATACTATGCAATAGTAACTCATATTATGTGAATTTCCTCTCAGTGCCAAAAAAAAAAANTTGGAATCTTTTAAGGCAATTCATTTTCTGCTAAGAAATTGAGAGACGAATAAAACTTTTTTTTTTTTTTTTGAGATGGAGTCTTGCTCCATCACCCAGG

>2866875

CCCCGGTTCCCACTCGCGCCTCTCCCTCCACACCTCCCTGCAAGCTGAGGGAGTGGGCTCTGGCCTTGGCCAGCCCAGAAAGGGGCTCCCACAGTGCAGTNGGGGGACTGAAGGGCTCCTCAAATGCCACCAAAGTGGGAGCCCAGGCAGGGGAGGTGCCGAGAGCAAGTGAGGGCTCTGAGGACTGCCAGCGCGCTGTTA

>2872636

ACTTGGCCAGACTGCAAACAGCTTTTCCTGATGCTGTTCAACACCAAGGAATGCTGAAGGGTGACCTAGGTAGCCCACCAGTGGCTAGAAAACAATGCACNGGAAGGCACCCTTAATGTCCTGGCATATGCACAGGGCCAGTTCCCAGAAGCAGACCCGCACTGGGACCCAAACAAGGAAGCCCAACTACAGCAACTGCAG

>2882925

TTCATTCATTCAATACCTATTAGTTTGTTGACGTTTTCTGGGTCTGGTAGTTTAGAGAATGCTTGCTTTCCTCAGCTAAAAGTTTTTTCTTTTTTTTTTTNCCTCATTTTTCTCTTTTAGTCAGAAGATTTTTTCCTTGAAAGCATCGATGGTAAACATCTGCACGTCAGAGAGTTTCTCAATAAGACTTGTAATCCAAAA

>2888243

CCCTGCTCAGTTGTTGTCATTAATTTTTTCACTTAGGCTTGGTATAGATATACAGATTTTCTCATTAATTTGGTTTGTTGGAAGGCAGATTTTTTTTTTTNACCACAGGCCATCATTTTGTAGAAAATGTTGCTCCTAACTATAAGGAGCACTGGTTCCAGGTGTTAGGTTCAGTCCTTTCCCATTGCAAAAAATCAAGGC

>2888607

ACCCCGTTTTTGTTGTACATAAAACCAGCTGCTTTTATAAAAGAAGATTGCCCATCAAAAGAATACACAGATCTGGCCGAGTGCAGTGGCTCATGCCTGTNTCCCAGCACTTTGGGAGGCCAAGGAGGGCGGATCACAAGGTGAGGAGATTGAGACCATCCTGGCTAACACAGTGAAACCCCATCTCAACTAAAGATACAA

>2888706

TATCCCAGCACTTTGGGAGGCCAAGGAGGGCGGATCACAAGGTGAGGAGATTGAGACCATCCTGGCTAACACAGTGAAACCCCATCTCAACTAAAGATACNAAAAAAAAAAAAAAATTAGCCGGGTGTGGTGGCGGGCGCCTGTAGTCCCAGCTACTGGGGAGGCTGAGGCACGAGAATGGCGTGAACCCAGGAGGCGGAG

>2888721

GGAGGCCAAGGAGGGCGGATCACAAGGTGAGGAGATTGAGACCATCCTGGCTAACACAGTGAAACCCCATCTCAACTAAAGATACAAAAAAAAAAAAAAANTTAGCCGGGTGTGGTGGCGGGCGCCTGTAGTCCCAGCTACTGGGGAGGCTGAGGCACGAGAATGGCGTGAACCCAGGAGGCGGAGCTTGCAGTAATTGGA

>6630527

AGGGTTTTTTAATGTTGCCTAGGCTGGTCTCAAACTACTGGGCTCAAGTGATCCTCTTGCCTCAGTCCCAGAGTTCTCTCTCTCTCTTTTTTTTTTTTTTNGAGATGAAGCTCTGTTGCCCAGGTTGGAGTGCAGTGGTATAATATCAGCTCACTGCAGTCTCCATCTCCTGGGTTTAAGTGATTCTCCTGCCTCAACCTC

>6644612

CTTTTATAAGAGAATTTAAAGTCTGTTGTGTAGCCACAATCTTTACAGTAGAATGTGTTATAGAGCCTATAATGAGGATACATTTCTTTTTTTTTTTTTTNGAGACAGAATCTCGCTCTGTTGCCCAGGCTGGACTGCAGTGGTGCAATCTCAGCTCACTGCAAGCTCCACCTCCTGGGTTCATAACATTCTCCTGCCTCA

>6644782

CCTCCTGGGTTCATAACATTCTCCTGCCTCAGCCTCCTGAGTAGCTGGGACTACAGGTGCCCGCCACCAAGCCCGGCTAACTTTTTTGTATTTTTTTTTTNAGTAGAGATGGGGTTTCACTGTGTTAGCCAGGATGGTCTCGATCCCCTGACCTCATGATCCACCTGCCTTGGACTCCCAAAGTGCTGGGATTACAGGCTT

>6661109

TTTCTTTCTACACCCCATGGAATTTGATTAATGGCTTGGTAAAAATATTAAAATGTTCTCTTTGAGCTGGCATATGTTTCTTTAGTGAGGAAGCTGACAANGACTCTGTGGTGAGATTCTGACATGCTCATGATTTTACAATTTCAGACCTGCTAAAAGTGTTTGTGTAAATACAATTTCTGCTTCCACTTGTGTAGCTTG

>6670458

TTTATAGTATTAATCCTTACTGGAGTAAGATGGTATCTCACTGTGGTTTTGCCTTGCATTTTGCTTAATGTTTGAGTGTATTCAGTTGTTTCTGTTTTTTNTTGTTGTTGTTGATTTAATCCTGTAAGTGAGCACCTAGCACTTTATAAACATTAGTCTAAATACCATACAAGGTAAGACCTGCCGTATAAATGAAGTGAA

>6692843

TAGTGTGAACTTAGGAGGCAGAGCTTGCAGTGAGCTGAAGTCGTGCCACTGCACTCCAGCCTGGGTGACAGAGTGAGACTCTGTCTCAAAAAAAAAAAAANGATCTTATGTATTTCTGTGTTGGTTGTAATATCTTCTGTTTTGTTTTTAATTGAAATTATTTGGATCTTATATCTTCTTGGTTAATCTCACTAGTGGTCT

>6698831

GAGAGACTGTGAAACAGTGATGTTGTAACAATGTGTTGAATTATTTATTGCCAACATATCCTCTTTACATTTCCTTTGTGGATGACTAGGTTTTTTTTTTNGTTTTTTTTTTTTGTTTGTTTGTTTTTGTTTTTGTTTTTTTGAGATGGAGTCTGGCTCTATCACCCAGGCTGGAGTGCAATGGCATGATCTCGGCTCACT

>6753301

AGAAACCAGTTTGGAGATTCCTTAAAGAATTTAAAACAGGCCAGATGCAGTGACTCATGCCTGTAATCCCAGCACTTTGGGAGGCCAAGGGGGGCGGATCNCGAGGTCAGGAGATCGAGACCATCCTAACACAGTGAAACCCCGTCTCTACTAAAAATACAAAAAATTAGCTGGGCGTGGTGGTGGACACCTGTAGTCCCA

>6757833

ATCACTTGAACCTGGGAGGTGGAGGTTGCAGTGAGCCAAGATCATGCCACTGTACTCCAGCCTGGGTGACAGAGTGAGACTCTGTCTCAAAAAAAAAAAANTTGTTTTTTGGAGTTATCGTTTGGCCAAATGAAAGAGTCACAGTGATTTGGGAATGGTGGTACATGCCTATAGTCCCAGCTACACAGTACACTAAGGTGG

>6768902

TCAGAGGATCTTCAGGTTCTCCTCTGTCACTTGGTCAGCAGGCTCAGTCCACTTGCGAAGGAACGTTGGTGTTACTGCGGTGGCTTTTTTTTTTTTTTTTNGAGACAGAGTTGTGCTCTGTCACCCAGGCTGGAGTGCAGTGGTGTGATCTTGGCTCACTGCAAGCTCCGCCTCCCAGGTTCATGCCATTCTCCTGCCTCA

>6803428

CTAGACAGCCATTGTTGGGTGTTCTGTGACTATAGAATAGTTTGCATTTTCTGCACCTTGACGTTACTGAAATTGTACTCATTATTTTGCCTGGCATCTTNCCCTCAGCATCATGATTTTGGTGCTTCATGTTGTTGCACGTGTCACTAACCCATTCCTCTGTATTACTGGGTAGGATTCCATCCTTTATGCATGCACCTT

>6816124

AATTCTAACTTAAGATTCTAAATCAGTATATAAGGGGAATAGCTCTATTTTTGTCAACAAAAATTAGACCTACTTCCCAGTAATAGTATGGATTTAAAAANTTAGACATAATTTTCACTTACTATGAATGCTAATCTCTCTAGAAATCTGATCTCTCCAGAAAAAAATATTTTGCCAATGACATTTGGGGTATCTGGGGCT

>6834897

CCCCAGGTCTAGATCTTACTGGTTGTGTAGTTTTTCAGCACTCAGATGTTGAGAGCTATGTATTTCTCAGAGCAGTCTTCTCTCTCTCTCTCTCTCTCTCNTTTTTAATGTGCATAGGTGCATATAAAAATTGTGTGCCTTGTTTAGATGAGATCGGGGTGTTCAGGATAGTATAGCTGTGGATCCTATCCCTTTTCAAGG

>6855354

TCCGTAACTACAGGGAAACTTCCTTATGCCACTCCTCTAACTGTTCGCAGCCACTGTATTGTCTACCTCTGTAATTTTGTCATTTCTTTTTTTTTTTTTTNCTCTTTGAGATGGAGTTCTTCCTCTGTTGCCCAGGCTGGAGTTCAGTGGCATGATATCAGCTCACTGCAACCTCTGCCTCCTGGGCTCTAGAATTTTCCT

>6910451

ATCCTGGAGTCAAATTTCTTTAACAGGAATGTCCAACTGGGGCACGCAGAGCAAACTCTTTATTGTCTGTTCTCTGCTTTATTCCTTTTTTTTTTTTTTTNGAGATGAAATCTCACTCTGTCACCCAGGCTGGAGTGCAGTGGTACAATTTTGGCTCACTGCAACCTCCGTTTCCCAGGTTCAAGCAATTCTGCTGCCTCG

>6934729

ACTCCTGACCTCAGGTGATCTGCCTGTCTCAGCTTCCCAAAGTGCTGGAATTACCGGCGTCAGCCACCACGCCCGGCTAAGAACTGTTTTTTTTTTTTTTNGGCCAGATGCGGTGGCTCTTGCCTATAATCCCAGCACTTGGGAGGCCCAAGGAAGAAGACTGATTGAATCTAGGAGTTCAAGACCAGACTGGGAAAGAGA

>6961489

GTCCTGGAAGGGAAATATTGACTTAGAATGACACTAACACTTTCTGCCGTCTTTATAATTTCTTTCTCTCATCAAGATTAGGACAAATATATATATATATNCACACATATATTTTTAATGAATCTTCGTACTTTTTTTTAAAGAAAATTAAAAATGGTGTTCCTTGAAGGGCTTCATTTCATTGTATCAGGTGACATTTGT

>6979855

AGGTCGAGGCTGAAGTGAAAATACAATCCCAGCCTGGACAACAGAATGAGACCCTATCTTTAAAAAAACAAAAACAAAAACAAACAAACAAAAAAAAAAANAAACAAAAACAAAGAACAAAAGTAAGATGTAAAATCATTCTTAGCTTGTGGATTCTAGAATACTGGCAGGATTTGGGTCATAGGCTGCAGTTTGTGCACT

>6981969

CAAGACTGTTTTAAATGCCTTCTTTTCATACATAGCATTTAACATTAAGTATTTAATGTAATTTGTTTGACAAATTTTTCTTACCTTTTTAATTGTTGATNTGGAATGTAAGAATGCTTGTAATAATGCTGAAGCCAGAGGGATGGCTTTCCTTTCATACACGTGGAAATTTAATTCTTTGGGGGATATTGGAAGACACTG

>6995140

GGGAGGCCAAGGCAGACAGATCACTTGAGGTCAGGAGTTGGAGACCAGCCTGGACAACATAGTGAAACCCCATCTCTGCTAACACTACAAAAAAAAAAAANTAGCCAGGCATGGTGGTGGGTGCTTTTAATCCCAGGTACTTGTGAGGCTGAGGCAGGAGAATCCCTTGAACCCAGGAGGCAGAGGTTGCAGTGAGCTGAA

>7018099

TACAGGTGCCTGCTACCATGCCCAGCTAATTTTTTTTTTTTTTTTTTTTTTTTAGTAGAGACAGGATTTCATCATGTTGGCCATGCTTGTCTCGAACTCCNGACCTCCGGTGATCTGCCTGCCTCAGCTTCCGAAAGTGCTGGGATTACAGACATGAGCCACCACACCCAGGGCAGATCTTTTATCTTATCCTATTTCTAG

>7019360

AGTCTTGAACTCCTGACCTCAGGTGATCCACCCACCTCAGTTTCCCAAAGTGTTGGGATTACAGGTGTAAGTCACTGTGCCCAGCCCATTTTTTTTTTTTNAATTTTTTGTAGATACAGGGTCTCCGTCTGCTGCCCAGGCTGGTCTCAAACTCCTGAGCTAAAGAAATCCTCCCACTTCAGCTTCCCAAAGTGCTGGAAT

>7020873

CCAGGAGGCAGAGGTTGCAGTGAGCCAAGATTATACCACTGCACTACAGCTTGGGCAACAGAGTGAGACTCTGTCTCAAAAATAAATAAATAAATAAATANTAAAAATAACAAAATGGTGAGTTTCATGTTCTATAAATTTCCTCTCCATAGAGAAAAAATTAGTCTTCTCCTAACTCTGAAAGCCTACGGTGGGCATCAC

>7033255

GAAACCAAGGCAGGAGGATCACTTGACGTCAGGGGTTCAAGACAAGCCTAACCAACATGGTGAAACCCCATCTCGACTAAAAATACAAAAAAAAAAAAAANTTAGCGGGCCATGGTGACATGTGCCTGTAGTCCCAGCTACTCAGAAGGCTGAGGCACAAGAATCACTTGAACCCAGGAGGCAGAGGTTGCAGTGAGCTGA

>7033678

ATTTTAAAAAGAATTGGGACTCCAACAGATATGTACACACCATATTCATAGCAGCACCATGGGTCAGGAAGTTTGGCTCACACCTGTAATCCCAGTGCTTNGGGAAGCCAAGGTGAGTGGGTTACTTGAGTCTAGGAATTTGAGGCTAGCCTGGCCAATGTGGTTAAACCCAGTCTGTACACATACACACAAAAAAACACA

>7052560

AGTGTGACATTATTAGGTTAACCTATAGCTACATGTGATGATAGTGAGGAGTTTCAATAGATGTATACATAGCACAAAGCAGGAACTAGGATATGAATGCNGTCTTCTTTATTAAGGACCTTTATGGGCCCAGTAATTTGAAAGGGCTCAAATTCCTCAAATAAAAGTATTTCTCTTTCCTGAAAATAACTGAAGTAGTCA

>7058030

AAACAGGATGCCACCCTTCAGCTTTCTTGAAATCTCTTTGGATCAACATCAGCCAAAGAAAAACAGTTACTAAAAGGGTCTGTATTTTTCTTTTTTTTTTNCTTGTTTTCTTTTCTTTTTTTTTTTTCTTTTTTCTTTTTTTAATCATACTTTAAGTTCCAGGGTACATGGGCAAAACGTGCAGGTTTGTTACATATGTAT

>7070280

TTGCTGATTGCCTTGTTACTATGCTATCATTATTGCCAATCTTTCTGAGAAAGGACTTTTTCTGCCCATGTCTAGTATGAAGATACTGCTTTTTTTTTTTNGCTTTGCTAGCAGCGGTGCATGAGGCTATGCAGGAAGAAGTACAATTCAAAGAAGGAGGTTCACTCTGCATGCATACTACATTGATAAAGAATGCAGTTG

>7075179

AAGTCGAGGCTTCAGTGAGCTGTGACCCTGCTACTGCAATCCAGCCTGGGCAATGGAAAGAGACCCTGTCTCAAAAGAGTTAATTAATTAATTAATTAATNTAAATCTAGTGACCAGAGAGAGCTGATAATCCAACAAGCTCAAGAAAGTGTCAGAGAGTACAAAAAAAAAAAAAAAAAGCAAGGTGGTATGATAGAGAAG

>7088848

TGCTTTTTAGAAGATGAATAGGTGGGTAGATGGATGAATAGATATTGAATGGATAGATAAATGAATCATGGATAGAGGATGGATGGATGGATGGATGGATNCATAGATAATGGGTGACTGGATGAACAGAAAATGAATGAATGGATGGATGATGAGTGAATAGATGATGTATAAATTAATTATGGAGGGATGACTAGAAAA

>7093273

CGTTTGAACCTGGGAGGCAGAGGTTGCAGTGAGCTAATATCACAGCACTGCACTCCAGCCTAGTGACAGAGAGAGACTCCATCTCAGAAAAAAAAAAAAANGAATGAGGCTGTATTGGAGCAACTACTGGACACAGGCAAAGCCCTGCCTAGGGAAGTATAGTATTAATAGTTCCCTAAAACAATTGAAAATAGAATTACC

>7098918

TCACCACTGCACTCCAGCCTGGGCAACAGAGTAAGACTCTGTCTCCAAAAAAAAAAGAAAAGTCAATATAAATGTGTTTTAAAGTAAAAAAAAAAAAAAANGAATATAGAGAAAAAAAGAGCATGGAAATATTGAAAATAATAAATAAAATAATGTATTTTAATTGAAATGCATAATTTACAAGCCAGGCACTGGTCCCAA

>7101782

CTTTCAAATATTCATTTACACATGGAATGCTGTCAGAGTCTAAATTTCAAAATTAAATTTAAAGTTGTCCTCTAAGCTGTTACTAAAAGTTAAAAAAAAANTCAGATGCTGGCAAAGCTGCAGAGAAAAGACGACATTTATAGACTGTTGATGGGAGCATAAATTAGTTCAGCCACTGTGGAAAACAGTCTGGAGATTTCC

>7104454

CTCCCTCCCACTCTCTCTGTCTCTCTTCTTTTGCATAACTCCGTCATTCTCTTTCTCTCTCATTCTCTCTCCCATGATCTCTTTCTCTCTCTCTCTCTCTNCCTCTCTCTCTCTTTTTGGATGACTATCATTCTCTCTCTCTCATTCTTTCTCCCACTTAGTTTTCTCTCTCTCTCTCTTTTTGCATGACTGTCATTCTCT

>7106653

GGTAGGAAAGTCACCTGAACTCCATAGGTGGAGGTTGTGGAGAGCCGAGATCGTGCCATTACACTCACTCCAACCTGGGCAACAAGAGTGAAACTCTGTCNAAAAAAAAAAAAAATTCAGGAATGGGAGGCAGCAGGTGTCTCTCAAGGTGCAGACACAGGCAGGGCTGGAGACAGGAACTCTGCACAGCAGTGCTTGGCA

>7107098

TCTCTCTCTCTCTCTATATATATATATATATATATATATATATATATATATATATTTTGAGATGGAGTCTCGCTCTGTTGCCCAATATTTTTTTTTTTTTNGAGATGGAGTCTCGCTCTGTTGCCCAGGCTGGAGTGCAGTGGCATGATCTCAGCTAACTGTAAGCTCTGCCTCCTGGGTTGACACCATTCTCCTGCCTCA

>7110530

ATCCTCCCATTTTAACCTCTCAAGTAGCTGGTACTATAGGCAATACCACCATGTCAGGATAATATTTTTATTTTTATATACTCATAGCATTTTTTTTTTTNAATTTTATTCATCATGAGTAAGGCTGAGTATCTTTTCACTTGTTTGAATCACTTTTTGTTTTAAGACAGTCTTGCTGTCACCCAGGCTGGAGCGTTGTGA

>7136259

GTGATACTGAGACCTAGGTAGGTCCCTGGCCCAACCTCTTCATTGAACAAAGAGAAATTCAAGGTTTTGTTCCTGGAAGGACCTGCCAAAAAAAAAAAAANGAGACAGAGAAAAAGAAAGAAAAGAAAAAAATGCAAGCTGCAAAATTGCTAAAGCTACAATAATTGTAAAAAAATTTTTATTTTGCTATAGACCAGGTCT

>7148030

TTGCTCTCCTCGTTGCTGGGTCTTATTAATGCCTTAAGATAGTTCATTCAGGCTGTTGTAGCAAAATACCACCGACTGGGTGGCTTTTTTTTTTTTTTTTNGAGACAGAGTCTTGCTCTGTCACCCAGGCTGGAGTGTAGTCGTGCAATCTAGGCTCACTGCAAACTCCGCCTCCTGGGTTCACACTATTCTCCTGCCTCA

>7160601

GTTCCCTCCCAAGCTAATGTGGCATGTACTGGCCTCCCAGGCTGTAGACAAGATGGATGGGGGCTGTGCCCACTTCTTGAGTTACCTTTTTTTTTTTTTTNGGAGGCAGAGTCTCACTGTGTTGCCCAGGCTGGAATGCAGTGGTGCAATCTTGGCCTATTGCAGTCTCCATCTCCTAGCTTTAAGCAATTCTCCCACCTC

>7168047

GGCTACAAATAGGCATTTTCTACTCAAGTGGGATAATGGTTATCTGGCAAATGTGTACTGGAGAGCCTCAGGAAAATCTACCAGCACCATTAAATGTTGCNTTTGTCTTCTGTGCACTTAAGCTGATAAACTTTAAACATTACAGCATGCCACTTCTGTCTGCTTTGAATAAGGTTGTTTACCGACATACTTCTGCAATCT

>7185932

TCTGCTCTTGGAGCTCAGCCAGGAACCATTTTTTATTTCCTTTTCTTTGGCTCTGTATTCACTCTCATCCTGAATCCTGCCCTTTTAATTTTTTTTTTTTNGAAAAGATGTGGTCTTGCCATCTCATCCAGGCTGAAGTGCAGTGGTACAGTCATGTCTCACTGCATCCTTGACCTCCTAGGCTCAAGGGATCCTCCCACC

>7188724

TATTATCCCAGAGTGGGATAGATGGGGGAGGATACAGTATATATCCAAAGAATATGTTGCAAACTAATAGGAGGGAGAGAGAGAGAGGGAGAGAGAGAGANAGAGAGATGAATGGGGAGGATACAGGATATATCCAAAGAATGTGTTGCAAACTAATGGGGGGGTGAGGGAATGAGGGAGGGAATGCATCTTTTTCTTGCA

>7188731

CCAGAGTGGGATAGATGGGGGAGGATACAGTATATATCCAAAGAATATGTTGCAAACTAATAGGAGGGAGAGAGAGAGAGGGAGAGAGAGAGAGAGAGAGNTGAATGGGGAGGATACAGGATATATCCAAAGAATGTGTTGCAAACTAATGGGGGGGTGAGGGAATGAGGGAGGGAATGCATCTTTTTCTTGCATATTTCA

>7189622

AACTTGCTGAGCTGTAGTGAGTGGAGAGGTGGGACACAGGTGCACAGCCTTCAGTAACTGAAGGAAAAAAAAACAAAAGAAATTTCTAATCCTGAGCTTCNTGAGCTCCCTTCAGCCACTCAGCTGCTGAGGGGCAGGAATCTAGCAGCAAGGTGGAGAGCGGAAGGCATTCCTACAACCTGTATTTGTGGGTCATTAGTC

>7197411

GACCCGCTGGCTTTCCTTCCAAAGTGCTGTGATTACAGACTTGAGCCACCACTGTGCCTGGCCTATTTTGGCCTATTTTTTCTTTTTTCTTTTTTTTTTTNGCAGAAGGAGTCTCGCTGTCTTGCCCAGGCTGGAGTGCAGTCGCATGATCTCAGCTCACTGCAAGCTCTGCCTGCCAGGTTCACACCATTCTCCTGCCTC

>7199198

CAGAAAGAGGAAAGGTGTCAGTTCAGGTCTCTCTTCCTCTTCTTATAAAGCCAGCAGTCCCATTCCCGTCATGAAAGTCCCACCTTTTTTTTTTTTTTTTNCTGATTTTATTTTAATTCAATACCTTTTGGGGAACAATTTTTTTTTGTTTTCTTTGTTGCATGGAAAAGTTCTTTAGTGGTGATTTCTGAGATTTTGTTG

>7200285

ATAGGTTGCTTTTACAAAGAACTGCATCTTTCTCTGTATGGGTAGTGTAGCTTCTGTAACTTTTTTGTGTGTGGGCTTTTTCTCCTTTTTTTTTTTTTTTNGACCTTCTTTCTAACAAAACATTTCTCTTCTGGCCTGGCCCCAAGGAAGTTGTGTTCATGGGCAGATAGATGGCCCTGCCCCTGGTTCAGGATTCAAACA

>7203489

GTTGCACAACAAGGTTGATAGGCTTCCCGCCACTGAACCATACACTTAAAAATGATTAAAATGGAAAATTTTATGATAGATGTATTTTACCAAATAACTGNATACATAATTGTAATATTTAATTAGACATAAATAATATATCCTGTATTAAATTTATATATTTAAATATATTTATCTCTTTAATATGTTAAATATTTAAAT

>7210836

GTTCAGGATGGAGTTACTCTCGTTCCAACGCCTGTGATACCTGTGTTGGGTGAGATTTGGAAGTCAGGAGAGGTGCCATCCCCCCTGCGACCACATAACANAGAGGTCGGTCATTTGTTGGGACGTCAGCATGATTGAGTGTTCAAGTCTAGCATATGCCTGAGACAGCTCCACTATGACTAGACCAGAAACGCAAAGGAA

>7217176

GATGTAGATAGGTGGATGATTGCATTAAAATTTTATGGGCAAATGATAGAGGTAGTATGGTACAATTGGCAAGAATTTTTTTTTTTCTTTTTTTTTTTTTNCAGACAGTCTTGCTCTGTCGCCCAGGGAGAAGTGCAGTGGTGCAGTCACAGCTTGCTGCAGCCACCACCTCCTGGCTCAAGTGATCCTCCTGCTTCTGCC

>7246189

ACTTGAGCCTGAGGAGGTCCAGGCCACAGTGATCTGAGATCACACCATTGCCCTCCAGCCTGGGTGACAGAGTGAGACCCTGTTCCAAAAAAAAAAAAAANCCCAAAAAACCTCAATGGCTTTTTGCTTTTGAAGGTGGTATGAAGAGAACGTCCACTTTAAGGCTTTAAAAGACAGTGAAGCTGGTTGTAGGGCTCACTT

>7252391

TCACTTGAACCGGGAGGTGGAGGCTGCAGTGAGCTGAGATTGCGCCATTGCACTTCAGCCTGGGCAACAAGAGTGAGATTCCGTCTCAAAAAAAAAAAAANCAAAACAAAAACTAAACAATTGTTATAAACCATCTTTCCCTATTCCTTCAACTTCTGAACTTTGCAACTAATCACATAGTAAAGGGTTTCCATGTCATGT

>7307498

TGTATTCACAATTTGCCATTGCACAATTATGGAACCAGCCCAAATGTTCATCAATCAATGAAGTGGATAAATGAACTGTGATTATATATATATATATAGANAGAGAGAGAGAGAGAGAGATGGGGTTTCACGACGTTGGTCAGGCTGGTCTTGAACTCCTGATCTCACGTGATCCACTCACCTCAGCCGCCCAAAGTGCTG

>7310284

TATATGCTGGCATGCTTGAAATTTAGTCTTTGAATAAATGTTTTTATTAGTGCTGAGAAAACACAACTGGTGCTTCTTTTCCAATAACTTTTTTTTTTTTNGAAACGGAGTTCTCTCTCTGTCGCCCAGGCTGGAGTGCAGTGGCAGGATCTGGGCTCACTGCAAGCTCTGCCTCCTGGGTTCACGCCATTCTCCTTCCTC

>7311941

AAGAATTACTTGAGACAAAAATGAAGAACTTCATGGAGAGTTGAGGGTCTTGGAGCAGAGTGACTCTTGGTGAACTCCACCTTTCCCATCTTCCAAAAAANCCCAAAAAACAATTCACTCTGATATCTATTAATACCTCTGAATTGATCATCTACAGTAATCAAAGCATTCAGGCCATAAAAGCTGGTGTCCATGTTAGGG

>7328032

TGGTGGTGATGGTGATGATGGTGTTGGTGATGATAGTCATGATGATGGTGATGATCATGGTGGTGATGATGACTGTGATTATGGTGATGGTGATGGTGATNATGATGGTGATGGTGAAGATGATGGTGATGGTGATGATGCTGATGATGATGAGTTGATGACAGTGATGATAATGGTGATGGTGATGGTGGTGGTGGTGAT

>7328365

GCTAGCTCTCACTGATGTCTTTGCTATCCAAAGAATGTTATACTTGCTCAGCAAACAACATCTATAGGAACTAGCACTCAGGAAAGTAAAAAAAAAAAAANGACAGCAGAGGGCCAGTCCATTCTTCTCGTAGTTCATTCATATACTTGGTCACATGCTGCCACTACCTGCAAGGGAGATTGGGAGAAGGTATCCCTATAA

>7335728

CACTTGGACCCAGGAGGCAGAGTTTGCAATGAGCAGAGATTGAGTTACTGTACTTCAGCCTGGCCAACAAGAGTGAAACTCCGCTCAAAAAAAAAAAAAANTCCACTTGTAACTTTTGACTCTCCCAAAACAGAACTAATAATAACCTACTTTTGAGTGGAAGCCTTCCTGATAACATAAACAGTCGATTAGCACATATTT

>7363324

CTGAGATGGGAGTATCACTTGAGCCCAGGAGGTCAAGTCTGCAGTGAGCTATGATTGCATCACTGCACTCCAGCCTGTGAGACCCTCTCTCAAAAAAAAANTCTGAATTTATAAATATTAAATTACTTTGAGATTCAGAGTCAATGACCCTCCAAAATATTAAGTGCCTGCTACTTCTCAGGGACATTTTATTATTAGGAT

>7367131

TAGAATCAGCTGGGTCTTGGTATGTGTTTGGTTACAAAAAAGCTTGCATTTCCAAATTTTATGTAGCTCATCCCATTTTCTACTTTCCTTCTTTCCTCCTNCTCCTCCACCTTTCCTCTCCTCCTCCACCTTTCCTCTCCTCCTCCACCTTTCCTCTCCTCCTCCTCCTTCTTTTCTTCCTCTTCTTCTTTTTTCTTCTCC

>7367949

TGGGACTCAATGAGGGCTCAGGGAAATAAACATTTGTCAAGTATATATGTAACTACATGACGGGTTCTTTCTGCCCACCAAACAGAAAAAAAAAAAAAAANCAATTTGCTGAGACCATTATGTTACAATAAAGCAAGAGCTTAATAGACACAAGGTCAGGTATGCCACATGGGAGATGGAGTTATTACTCAAAAATTGGAG

>7380765

GGAAGAGGCCCCCCAAAATCTGGCTATAAACGGGCCCCAAAACTGGCCATAAACAAAATCTTTGCAGCACTCTGACATGCTCATGATGGTCATTACACTCNTGCCAGAAGATTGTGGGTTTACTGGAATTAGGGCAAGGAACACCTGGCCCACCCAGGGTGGAACACTGCTTAAAGACATTCTTAAACCAAAAACAATAGC

>7400597

TAATTGATCTCATGCAACAGAGATATCACACAGACAGGACTTCAATCTCCCCAGTTTCTAGGAGAGAGAGAGAGAGTGAGAGAGAGAGAGAGAGAGAGAGNTAACTAAACTCAGTTTTACAACCAGCTAACAAGTCTGCTCTGAAGATAACTAACTCCCTTCTGCCATAAAGACAATCCATCTATGAAGGCAGAGCCCTCA

>7404282

GAAACAAGACATTTGTGAGCAGATGATTCTGTGGTGGGGGCTGCCCTGTGCATTGTAGGGTGTTGACCAACATCCCTGGGATCTACCCAACAGATGCCAGNAGCACCCCTTCACTCACTGAGACAAGTGAAAATGTCCCCAGATATTACCCAGTGTTCCCTGGGGAGAAAATTCCCCCCATTTGAAATCCACCATCAAAGA

>7404788

GAATAGATGATACATAGATAAAGATAGGTAGATAATAGATATAGATGATTGATATGATAGATGACAGATAAATAGATAAATGATATAATAGATGATAGATNAATATGATAGATGTAGATTATAGATAGATGACAGATAAGTGATAGATATGACAGATAATATATATGTAGGTAATAGATATGATAGATGATAGATATGATA

>7410220

GTCAGAGCAACCTTATCCACCTGTAAATGCTGCAGCCAGCCCAGAAGAATGCCAGTTACTTCTTTTCTGCTATATTGACGTCAGTTTTTTAGAGATTCAGNGGACCTGGAGCGTGGCCTTCATGCAGGGTAGGTGACCCCCAGATTGGGGCTTAGCTCAGGAAAAGTTTTTGGCTTCACATAGGGAAGAATTCAACAGTGA

>7425294

AAGTAGAATGTCCTCCAGGTTCATCTATGTTGCAGAAAATGACAGAGTCTCCTTTTTCCCTTCTTTGTTTATTAACACATTTCCTGTTTAGAAAAAAAAANTGCATCTCACTGCCTGGGCAGTATTCTCAGGACAAAGTAGAATGCTTTAAAGCTGAATAATATTCCATTGTGTGCATAGAGCACAGTTTCTTCATTCCTC

>7445878

TGGTATTATGTTCCCAACGTGGACCGTGGTGTCTGAAGCATAGTAGAAGCTTGGTAGCTGTAGAGGAAAGGAAGGAAAGAAGGAAGGAAGGATGGAAGGANGGAAGGAAGGAAGGAAGGGAAGTAAGGGAGGAAGGAAGAATGGAAGGAGGGGAGAAAGGAAAGAAGGAAGAAAGGAAGAGAGGGAGGGAGAAAGGGAGAA

>7463337

TCACAGGTGTTTTTAGCTCCGTGCTTTCATCATCAGTTCATTTTGCCAACAAGCATTATCACAAACTATGTAATTGTCACATTCAACTTTATGCCATTTTNCAACTGACTCCTCATCTTCTAATACACAGAACTGAAATTCATATTTGCTTCAAACTCTGCTACTGGTCCCCCAATACTCACCGTTATTTAATTAGTTATT

>7464196

AATCATATTTGATAATGTTACTCAAATATTTCAAGTAAACAGATAATGTAAAGATAAATTTAATATGTAAGAATACATAATATTCCAAAAAAAAAAAAAANTCTGAACACCTTGGCTTACACCGTTTGACCTCACATGTTGCTGGCCTGCAGCTAAGGGTATAGTATGCAATTTGAATTTCATGTTAAAACAATTCAGTAA

>13875624

AATAGTGACTGTATTCCAGCCTGGGCAATATAGTGAGATCCCATATCTTTCTAAAAAAATTCATTTTTGTTTATTGTTTATATCTTCTTTCTTTTTTTTTNGTTTTTTTTGTTTTTTTTAAATTATACTTTAAGTTTTAGGGTACATGTGCACATTGTGCAGGTTAGTTATATATGTATACATGTGCCATGCTGGTGCGCT

>13889862

TTTCTCCTTTTTTCAAAAAGTTTCATAGTTTTACATTTAAGTCCATGATCCATTTTGAGTAAATGTAAAAGTGTTTAGATTGAGATTCCATTTTTTTTTTNGAAACAGTATTTCCTCTACATACATACACCCTAAATCCATAAATCTAAATAGAGGCTATAACTCAATCAAAGAAGCAAAGAGTCAAATAGTTTCTTTTCA

>13901814

GGGCACTTGGAAATGACAGCTGCCGTGAGACATGGAATTGGAGGAGTTTCTGGGAGAATTAGAGGGTAGGGGTTTGTACTCTGGCAGTTTCTGGGTATCANTTTCATCTCTCACCATCACCAAGGAGCGGGAGTAACCCATGGCAGCCTGCTCTGAGAAGACACCATGCAGCGTCTTCATGTCTTGGACCGCAGTGGGAGA

>13902503

CTATCCACAGCAGTGGGGACATGAACTTCTCATCATGAGTTGTATACCAGGTGACCATATTCAGGGCTCCCAAAGGAATAAAGTTTGGGTTTTTGTTTTTNGTTTTTTGTTTTGGTTTTAGTTTTGGTTTTTGCAGTCCATCATCCCACTGAATTCAGTCCCATGGACCATTTTGGTGAATGGCTGGCCTTGTATACCTTC

>13922260

TATACATAGATTAAAAAACACATTGTACCTTATATTTAAATTAAATATATTTATATTTAATATTTATATTCACAACCATTATTTGTGAATTAAATAAATANGATTTCTTTTTAAAAAAGATTAGAAATAGATTTGTCAGCAGAAGACTTTCAGATATGAAGTCAGTGGGATAGAATGTTTAAAGTGATGAAAGAAAAAACT

>13956492

ATATTCAGAGATTTCAAACAACCACAAACACACCACAGGCTCAGAGAAAATGTCGAGGTCAGTATCTGCTCCTGCTCCATCCCTCAAGGCCAGAAGGCCANCAGGAGTCTTGGAGTCAACTGTTTCTGGAAGCTTCTTCCAAAGATAGCGATATGGTATCCTATAAGTTATCTGTTGACTCTTTATATGTGAACAGTTAAT

>13957851

GTGCTCAGAAGGTGAGCTGCCCTTTTCAATTCACACAGGTGTTACCCTGTGCTTAGTCCACAGGCTCCACATAAGCCAGCTTTGTATTTCTTTTTTTTTTNATTTTTATTTTTAGACACAAGGTCTTGCTCTGTTGCCCTGGCTGGAGTGCAGTGGTGCGATCATAATTCACTGCAGCCTTGAACTCCTGGGCTCACGTGA

>13958414

GGGAAGCCGAGGCAGGCAGATCACCTGAGGTCAGGAGTTTGAGACCAGCCTGGCCAACAGGGTGAAACACTGTCTCTACTAAAAATTAAAAAAAAAAAAANTTAGCCGGATGTGGTGGCAGGCACCTGTAATCCCAGCTACTCAGGAGGCTGAGGCAGGAGAATCACTTGAACCTGGGAGGCAGAGGTTGCTGTGAGCCAA

>13971612

GCAACAAGAGGAAAAAGAAAGAAAGAAAAGAAAGAGAGAAAGAGAGACAGAGAGAGAGAAGGAGAGAGAGAGAGAGAAAGAGAGAGAGAGAAAGAGAGAGNAAGGAAAAGAAAGGAAAGAAAGGAAAGGAAGGAAGGAAGGAAGTCAGGCAGGCAGGCAGGCAGGCAGGCAGGCAGGCAAGCAAGCTAGCTGCACATCTTT

>13974710

CTTCCCAGTAGCAACCCTACACATTTGAACCATAGTGAATAGCCACACATTTGAAAGGCTTACAACCATTTCTTTTTCTTCTTCTTTTTTTTTTTTTTTTNGAGATGGAGTCTCTCTCTGTTGCCCAAGCTGGAGTGCAATGGTAGGATCTCAGTTCACTGCAACCACCACCTCCAGGGTTCAAGCGATTCTCCTGCCTCA

>13984357

AGCCGTTCTGCACTGATTTCTCCCCATTTCATAGATTTATCTACCTTTGGATGGGGTTCCTGTGTGGATGTCCTTTTTGTTGATGTTCATACCTTTCCTTNGTTTGTTAGTTTTCTTTCTAACAGGCAGACCTCTCTGCTGCAGGTCTGTTGGAGTTTGCTGGATGGTAATCTAGACCCTGTTTGCTTGGGTATCACCAGT

>13990180

GAAAATGATTTAACAAGGTTTCCCTCCTAAGGCATTTTTGTGATCCAAAGTGTCACTGAAGTCATTTTAAATTTATATATTTTCATGAAGAAAAATATATNTCTTCCATGCATATTAAGATATAATTACAGCCAAATCATAAACTGTGTCTGCTCCAAATGCCAGAGGAATGAAGAAAACAGATTCTTCCCTCTCCAGTAA

>13990181

AAAATGATTTAACAAGGTTTCCCTCCTAAGGCATTTTTGTGATCCAAAGTGTCACTGAAGTCATTTTAAATTTATATATTTTCATGAAGAAAAATATATCNCTTCCATGCATATTAAGATATAATTACAGCCAAATCATAAACTGTGTCTGCTCCAAATGCCAGAGGAATGAAGAAAACAGATTCTTCCCTCTCCAGTAAC

>13991782

GAAATAGTCCTGTTGCTCATTCTACAAAAATGTGCAGAGTTTCCACAATGGGGCTGAAACTCTGCTGTAATAGCCAACATTTTTACCTTCCTTTTTTTTTNCCCACTTATTCCAGCTTCTTCAGACAACCTCCCAAATAAACTACCTCTCCCAGGTCCCTCACTTGGGCTCTGCTTTTGGTGGAAATTGAACTTAAACACC

>14007957

ATTTCACTGGGCAACCCACTCAGGTCCCCTTCCTCACTGTGAAAGCTTTGTTCTTTCACTTTTCACAATAAACCTTGCTATTACTCAAAAAAAAAAAAAANTTCATTTCATCCATGTTTCCACATCACCTTATGTCATCTATATATGGTAACACATATCATCTTATATCATCAGAAAGACAATACTGCGTCTTATTACTTT

>14010026

ATTCAGCATGATTATTTGCTTGGTTGGTGAGTTTTGGGCTCTATCCTTGCATTTTTTATGTTTTCATATTAGAAGACAGATTGATTTAGGTAAAAAAAAANACTCTTCATTTAAAAATATACGGAGTCCTCCCTTTTCAGCAGTGAGTAATTCATGGCCTCGGGAGTTCTGGAAGACAACGGCAGCTAGAAAGTCAACTTT

>14019497

TTGCCCATGAATGGGAGAAAATTTTTGCAATCTACTCATCTGAAAAAGAGCTAATATCCAGAATCTACAATGAACTCAAACAAATTTACAAGAAAAAAAANAACCCCATCAAAAAGTGGGCAAAGGATACGAACAGACACTTCTCCAAAGAAGATATTTATGCAGCCAAAAGACACATGAAAAAATGCTCATCATCACTGG

>14027534

TCTATCCATCTTCTATGTATCTATCTCATCCATCTATCAAGCTATCTGTTATATATTTATTCCATCTATCTTCCATCCATCCATTCATTTGTTATCTTTCNATATATTATCCATCATCTATCCATTCATCTACCTATCTACCTAGCTATCATTTTTTATCTATCATGCATTCATATAGGTATTATGTATCCATTACATCAT

>14068361

TGTGTGGTCTGGGTCAGGGAGGAAGCGGGTAACCTTCCATACCTTCCATGATCTCATCTTCTGCAGCTGGTTTTCTTTTTTCTTTTTCTTTCTTTTTTTTNAAGACGGAGTTTTGCTCTGTTGCCCAGGTTGGAGGGAGTGCAGTGGCGCGGTCTTGGCTCACTGCAAGCTCCGCCTCCCGGGTTCACACCATTCTCCTGC

>14070229

CACTTTTTAAAACTGGGATGCCATCAGCCTGCTTCAGGAGCATCTCAGCAAACAGGATTTGTTACACAAGGAAATGGTACCATTAGGCTTGTAAAAAAAANGCTCTATTTTTTTATATTCACTGATGTCTTTTGTAGATCAAAGACAAAACAGGCAAATGTTGATAATAAGGACATGTTGTCAAAATGCTGGTTCAGGGAG

>14101180

GCGATCCCCTGAGTAGCTGGGATTACAGGTGTGCACCATGAGGCACGACTCTTCTTCTTCTTCTTCCTCTTCTCCTTCTTCTTCTTCCTCTTCTTCTTCTNTTCTTCTTTCTTCTTCTTCTTCCTCTTCTTCTTCCTCTCCTTCTTCTCCTTCTTCTTCTTCCTTTCTTCTTCCTCTTCTTCTTCTTTTCTTTCTTTCTTT

>14101306

TTCTTCTTCCTCTCCTTCTTCTCCTTCTTCTTCTTCCTTTCTTCTTCCTCTTCTTCTTCTTTTCTTTCTTTCTTTTTCTTTCTTCTTCTTTCTTCTTCTTNCTCTTCTTTCTTCTTCTTTTCTTCTTTCTTCTTCTTCTCCTTCTTCTTCTTCTTCTTCTTCTTCTTCTTCTTCTTCTTCTTCTTCTTCTTCTTCTTTCTT

>14107376

CCACACCATCAGCCTCAACTGCTCTGCCGCGGGGACCCTGACACCCAGCCTGGTGTGGGTCCTTCCCAATGGCACCGATCTGCAGAGTGGACAGCAGCTGNAGCGCTTCTACCACAAGGCTGACGGCATGCTACACATTAGCGGTCTCTCCTCGGTGGACGCCGGGGCCTACCGCTGCGTGGCCCGCAATGCCGCGGGCCA

>14109330

TACTGTAATTTTAGGGTCAATATACTGTACATTTGATAATAAAATATATTCTCCCAAAAACCTGGCAGTGATGACAATGCTATTTTCTTTTTTTTTTTTTNAATTATACTTTAAGTTCTAGGGTACATGTGCACAATGTGCAGGTTAGTTACATATGTATACATGTGCCATGCTGGTGCGCTGCACCCACTAACTCGTCAT

>14125262

GGAAGTTCAGTAACAGATTAATGATGAAACTAAGAGGGCTAGTGTTAGTGAGATCCTGGATGGCCAGCACAAACTGACTGCTTTGGGAAAAAAAAAAAAANGTTGGTTTATCTTCTCCTGAGAGGTTGTTCATCTTACTTTTTAGTAGAGTCTTTTTAAAATTAACCTTGTTAGAACACAAGAAACCTGTGTTTCTTGTTG

>14143041

TGTGGATTTTGGAAGAATGAAAGCAAAGCTATTTTTCACTGATGTTCAGCAACATGAGTTTTAAGACAATAAGAAAAAACAAGCCAAAAAAAAAAAAAAANCTAAGAGTTTCCACATATAACAGGAGACTCACACAGTCTTTTTTCATTATTTTATGTTATATAAGCTTTTGTGAAATATGTCAACATAATGCAATCTTAC

>14146206

TGGGTGCAGCACACCAAAGTGGCACATGTATGCATATGTAACAAACCTGCATGTTGTGCACATGTACCCTAGAACTTAAAGTATAATAATAATAAAAAAANTTGTTTGTGGCTGTTATCTTTTATTTTTCCTTTGTTATTCACTCTTCTTTGTATTTAGAAAGTCACTCTTCTTTCTGATATGAGATATTGCCCAGATGTC

>14168652

CACATTTGGCAGATTTATGTAGCGCCTAAATTTTCCACTTTGAATCACTATCATGCCAATTATATTAAAGAGATATTCCTGAAAAAAATAAAAAAAAAAANCACAGTTACCATCATTTTATCTCAGCATTCTGTGTGCAATTAACAGCAATTTTCTCATAATTAACTAATGGATTCTCTTCATGAGTTCACTCCCAAATTG

>14187200

TCTGATGATGGGTGCACCAAAATCTCACAAATCACCACTGAATAACTTATGTAACTAGATACCACCTGTTCCCCCAAAACCTACGGAAATGAAAAAAAAANTTTAAAAAGATAGCAGGAATTTGTTCTCTCAAACTTCTGGAAGCCAGAAGCCAAAATCAAGGTGTGAGCAGCAACACACCCTCTCTGGAGACTCAAAGAG

>14191958

TGAGTTTTTTTTATATGTTCGTTGGCTGCATAAATGTCTTCTTTTGAGATGTGTCTGTTCATATCCTTTGCCCACTGTTTGATGGGGTTGTTTTTTTTTTNCTTGAAAATTTGTTTGAGTTCTTTGTAGATTCTGGATCATAGCCCTTTTTCAGATGTATAGACTGCAAAATTTTTTCCCATTCTGTAGGTTGCCTGTTCA

>14195831

CGTTGGGAAGTGGCGGGCGGATCATCAGGTCAGTAAATCGAGACCGTCCTGGCTAACACGGTGAAACCCCATCTCTACTAAAAATACAAAAAAAAAAAAANTTAGCCTGGCGTGGTGGCGAGCTCCTGTAGTCCCAGCTACTCAGGAGGCTGAGGAAGGAGAATGGCATGAACCCGGGAGGTGGAGCTTGCAGTGAGCCGA

>14198080

ACCAGAATCTAGCTATACTACCTGATAATAGTCCATAATGTTGATACTTTGTTTATATGCACACACACACACACATATCAATATATACACATATATATATNCTATGAATACACACAAGCATGTACACACACATATAGGTACTATATATACACACAGATGTACTATCTTTATATATACAAACATATACACACATGTACTTTA

>14202730

GTGGAAACATTATTCACAAAGGAAGACTTTCAATATGGTTGCATTGAAAATTCAGGGACTTTGGAAAAATCACGTACTCTCCAATTTTATTCCTGTCTAANTGTCACTTAAATGAAGACAGAGCCATTGAGCAACCCCTCACAAGGGAAAGTAATCTCATTTTTGCACTGAATAACTATTGGATGCTTGCTGGGCTCAAAA

>14202773

TTGAAAATTCAGGGACTTTGGAAAAATCACGTACTCTCCAATTTTATTCCTGTCTAAATGTCACTTAAATGAAGACAGAGCCATTGAGCAACCCCTCACANGGGAAAGTAATCTCATTTTTGCACTGAATAACTATTGGATGCTTGCTGGGCTCAAAAAGTGTTTGATCCTCAAAGAATTCTGATGTTATAACTTTGAATA

>14208902

TCTCCTCCTTCTTTTTCTCCCCTTCCCTCCCCTCTCTCTTTCTTTGTTTGGTCCTTTTTATATTTTTCCATTTCCCCCCTTCTTATTCTCTCCTTTCCTCNCTCTTTCTTCCTCTTTTTCTCTCTTTCTGACTCTGCCTCACTCTTCCTCCCTCCTTTCATTTTTTCCTTTCTCCTTTCCTTTCCTTTTCTTCCCTTTCTC

>14208910

TTCTTTTTCTCCCCTTCCCTCCCCTCTCTCTTTCTTTGTTTGGTCCTTTTTATATTTTTCCATTTCCCCCCTTCTTATTCTCTCCTTTCCTCTCTCTTTCNTCCTCTTTTTCTCTCTTTCTGACTCTGCCTCACTCTTCCTCCCTCCTTTCATTTTTTCCTTTCTCCTTTCCTTTCCTTTTCTTCCCTTTCTCTCTCCTTC

>14213631

GAGGGAGGGAGGGAAGGAAAGTACAAAAAAGAAGGAAGAAAGAAGGAAGGAAGGAAGGAAAAAAGAGAAAAAGAAAGACAGAAAGAAAGAGAGAAAGAAANGAGAGAGGAAGGAAGGAAGGAAGGAAGGAAGGAAGACAGAGAAAAAAAGAAAGAAACAAACAAACAAAGAGAAAGAAAAAAGAGAGAAAGAAAGAGAGAA

>14213666

AAGAAAGAAGGAAGGAAGGAAGGAAAAAAGAGAAAAAGAAAGACAGAAAGAAAGAGAGAAAGAAAGGAGAGAGGAAGGAAGGAAGGAAGGAAGGAAGGAANACAGAGAAAAAAAGAAAGAAACAAACAAACAAAGAGAAAGAAAAAAGAGAGAAAGAAAGAGAGAAAGAAAGAAAGGAAAAGAAAGAAAGAGAGAAAGAAA

>14216217

AGAGCATTTAAAAGCAAATTCAATTATGTTATTTGTGTCCATTTACGGGGTACAATGCAATTTTCTTACAGGCATAGATTGCATAGTGGTGAAGTCAAGGNTTTTAGGGCATCCATCATGTGAGTAATGTACTTCGCACCCATTAAGTCATTTCTCATGCATCCTATCTTCCCACTCCTTCACCTTTCTCAGCACTTGTCA

>14230055

CTGGGAGGTCAAGGCTCTAGTAAGCCATGAATGTGCCACTGCACTCTAGCCTGAGCAACAGAGCAAGATCCTGTCTCAAAACAAACAAACAAACAAACAANAATCCTGTGGATCATCCTGTGGGGTGCTGTGATCATGACTCTAGGATATGAGACAGATATGTACCTTGACCACCAATAATCCCATTGCCACCATGGGCAA

>14232472

TTTTCCTCTTTCTTCCTTTCCCCTCCCTCTCTTTCTCCCTCTCTCCTTCCTTCTTTCTCTTTTTTCTTTTTCTTTCTTTCTTCTTTTTCTTTTCTTTCTTNATTTCTTTCCTTTCTTTTTTCTCTCTCTTTCTTTTGCTTTATTTCTATTTTCTTTCCTCTCCTTTGTGCTCTTCCTTCCTTTCCCATCCCTCTCTTTCTC

>14236042

ACTTGAGTACCGGAGGTTGAGGCTGCAGTGAGCTATGACTGTACCGCTGTCCTCCAGCCTGGGGAACAGAGTGAGACACTGTCTCAAAAAAAAAAAAAAANGAAAGAAAGAAAAGAAAAAACTCAAATTGTAAGTCTAAAATGCATTTAATACACCTACCCTAATGAATCCTGATACAAAGATTCTATTAAGCTGTTTATT

>14251945

GGTGCAGCAAACCAACTCGGCACATGTATACATATATAATGAACCTGCACGTTTTGCACATGTACCCTAGAACTTAAAGTATAATAATAATAAAAAAAAANGAATAGTGGACTTTTCTGTAATCTATGGCAGTCAGCCTTCTTGCACGTTTTTTCTTAGTATGATTTAGTAACAGTTTTCAATTCAAAGGTGTAAGTGGAT

>14271271

TTAGCTTTAGTTTGGTAGGGTTTCCCCCGGGACTATGGCCCATGACTCTGGAGGGGTTGGCACTTTCTTGACTCAGTTGTGATGAGTCCATCCTTTTTTTNGCTGGATGAACAGCAGTCTCAGTGGTTAGCAGCACAAGGTAGCGTCTTTCCCAGGCTGGTTTGAGTTTCCTTTCTTTTCACCCTTTGATGAGATCATGAT

>14274821

GTAATCCTAGCACTTTGATAGGCTGAGGTGGGTGGATCACCACAGGTCAGGAGTTCAAGACCATCCTGACAAACATGGAGAAACCCCATTTCTACAAAAANTACAAAAATTAGCTGAGTGTGGTGGTGTATGCCTGTAATCACAGCTACTCAGGAGACTGAGGCAGAGAATTACTTGAACCCAGGAGGCAGAGTTTGCAGT

>14276262

ATCTCAGCACACTGGGAGGCCAGGGTGGGAGATCACTCAAGTCCAGGAATTAAAGGGCAGCCTGGACACTATAGTGAGGCCACTTCTATGTAAAAAAAAANAAAAGAAAAATTAGCTGGGCATGGTGATGAGTGCCTGTGGTCCCACTACTCAGGAGGCTAAGCCAGGAAGATGGCTTGAGCCCAGAAGGTTGAAGCTGCA

>14316200

ATTTTTTTCTGTATAATGCACATTCCCCAAATCTCAGTCAAATTTTATTTTCTTAAATCATTGAAATCATTGATCTTCCTAATTCACTTTTTTTTTTTTTNGAAGACAGGGTCTTACTCTGTTGACCAGGCTTGAGTATAGAGGTAAGACCGTGGCTCATTTCAACTTCAATCTCCAGGGTTCAAGTGAATCTCACATCTA

>14324302

GACTGTGGACTTTCGAGTTAATGCTAGAATGAGTTAAGATGGGTCTAGGAGCGATGGCTCACACCTGTAGTCCCAGCACTTTGTGAGGCTGAGGCAGGTGNCTCATGAGGTCAGCCACAACCTCCTGGACTCAACACAATCCTGGCTAACACAGTGAAACCTCGTCTCTACTATAAATACAAAAAATTAGATGGGTGTGGT

>14341090

CTGTTGTGTTTGTGTGAATGTGTGTGTGTCGCACTTCCTGTATAAATGTCTTCTCTCTGACCTTCTCCTCCCTTCTTGTCTCTGGTATCAAATTCCCCCCNAAGAAACTAGAATTTCTCCATAGAAGTTAGATTTTTTCCCCATAGAAACTGGAATTTTCGCAACCTACTCATCTGACAAAGGGCTAATATCCAGAATCTA

>14348598

TTACAGTGATTTCTAAATAAAATGACAGGTGTTCCTAAAAGAGACAGAAGAGCAATGGATGATTTGATGCAGAAAATACATAAATACATACAATAAAATANGAGACAGAAGAAGTAACACAGACAAAGACACAGAGGAGCAGTCCATGTGGAGATGGAGGCAGAGACTGGAGTGGTGCGGCCACAAGCCTAGTGATGCCTG

>14350485

TCAAGTGATCCTCCTGCCATGGCCTCCCAAAGTGCTGGGATTACAGGGATGAGCCATTGTGCCTGGCCTGGAAGTTACAATTATTAACAAGACAAAAAAANTATAGGTCAGTGGTACGAAAATCATGATAGAACTCTTTTAGCATCCTTAGGTAGACATGTATTCAACTTTTGGTCAAGTGTAGATGCCTATTTTTAAAAA

>14352273

TACTGAGCAATGGGCTTGCTGCTTGACATGTATATAAGCCAATACTAGGGCATTGCTTTGGGGATTTTGTTGTTATTGTTTAAGACAGGGTCTCACTCTGNTGCCCGGGATGGAGTGCAGTGGCACGATCTTGACTCAGCGCAGCTTCTGCCTCCCAGGTTTAAGTAATCCTCCCATCTTAGCCTCCCGAGTAGCTGTGAC

>14352593

CAAAGTGCTTGGATTACAAGTGTGAGCCACCATGCTGTGCTGTAGGGTACCATTTTTTTTCTTTGTTCTTTTCTTTTTCTTTCTTTCTTTTTTTTTTTTTNCCTTTTTAAGGCTTTATTGTGAGGTCAGCTGGCAAGGAGACAGGAGGCAGGGCTCAAATCTGTCTCCCTGATCTGGGGGTTAGCTCAAATATTTATGGGT

>14392187

TTACCCAGATTGTTCATCTTGATAATGTGCAAATGAGGCAATCTGCGCCCCGCATTTGCAATTCCTACTATGCATCCAGGAAAAGAAAAAAAAAAAAAAANCAGCACACCAACAACAAAACATTACATTCAGCGAAACACCTACAGCTTTTCTTGCTGATGCTGAATGTTCTTATCTGTGACAACCACCAAAGCCATTCAT

>14392734

CTGTCTCCCAACAAAACACCATTTTGTGAGATGGAACACTCCATTAAACATGCTATTATATGATTCCGTAAACTCTAGAAACCAGATTTCTTTTTTTTTTNCTTTTTTTTTTTTTTTTTGAGACCGAGTCTCTCTCTCTCTCTGTTACCCAGGCTGGAGTGCAATGATGGTGATCATAGCTCACTGCAGCCTCAACTTCCC

>14396430

TGAACTCAGGAGATGGAGTTTGCAGTGAGCCAAGATCGCACCACTGTGCTCCAGCCTGGGCAACAGAGGGAAACTTCATTTCCAAAACAAAAAAAAAAAANCCACACAAAACAAAAAAAAAGGAATGATGGTGCGACCCAGCACAGTGGCTCACACCTGTAATCCCAATATCTTGGGAGGTTGAGGCAGGCAGATTGATTG

>14399101

AGGACATCATTGATTCTCTAATACTTTCCTACAGGGGTATTTGATGCCTTCCAAAATTACAAAATACCCCATGAAAGGGCTAAATCTCAAAGGAGCAACCNGTCGGGCCATGAGTAGGGACCCTTCTGTAACCAAGTTATGGCTTTCACACCAAAAAGCTGGGGCAAGGCAGTCTACCACAAAAGCAAAATTCTCCAACCA

>14419630

TCCAAATTGTGGAGAAGTCAGGTAGAGAGAAATGTAAATTTTGCTCACAGGAACATGCAATCCAATCACTCTAAACTGTAAATATCTCAAAAGAAAAAAANGATGTTAATGTTTCTTTAACCAGAGCAACAGCCTTCCAAACAAGATGTTGTTTGTTTACCTTGGAACTGCAATTCACATGCAAAGACGTATTTATTGGGC

>14425210

ACTTGAACTAAGGAGGCAGAGGTTGCAGTGAGCTGAGATTACACCACTGCACCCCAGCCTGGGCAACAAGAGCGAAACTCCATCTCAAAAAAAAAAAAAANGAAAGAAAGAAAAAAGGCAACATGGCACTAGCCAGGTAGAGAGTCCGTCTGCATAAGAAAAGAATAGGTTCTGAGGTGGGCAGATCACCTGACGTCAGGA

>14456516

ATGGCATGAACCTGTGAGGCGGAGCTTGCAGTGAACCGAGATTGAGCCTCTGAACTCCAGCCTGTGCGACAGAGAGACTCTGTCTCAAAAAAAAAAAAAANGAAAAGAAAAGAAAAGAAAAAGAAAAGAAAGAAAGAAGAGAAATATTCAGTTTAATATAAAGGATTGTGGAGGCCAGGCACAGTGGCTCATGCCTATAAT

>14456877

GAATCGCTTGAACCTAGGAGGCAGAGGTTGCAGTAAGCTGAGATGTCGCCACTGTACTCCAGCCTGGGCAACAAAGCAAGACTCCATCTCACAAAAAAAANCAAAATAAAATAAAATAAAATAAAGATTGTGGAGGCCCAAGTTCTTATTTGCAGAAGAAGCCTTCAGGTACTAGGCTTCAGAGAGGAGAAGAGGTAGACA

>14463307

CATATTTAAAAAAGTATTTATTTCATTAAGAACTTGTCCTCTTGTTAAGTAATTGCATTATTTTTTTGTTTGTTTTTGTTCTTTCTTTTTTTTTTTTTTTNGAGACAGTCTTGTTCTGTCCCCCAGGCTGGAATGCAGTGTTTCCATCTTGGCTCACTGCAACCTCTGCCTTCCAGGCTCAAGCAGTCCTCCCACCTCAGC

>14463847

CATTCGTGGCCTTCATTGTCTTTTAATTGCTTGTATATGTATGGCTATGTTTACCAGAGCTTTATAGGATCTTTCTGTCATTCTCTGTCATTTTAAAAAANTCCAGCTCTTGGATTTACTTAACAATTGTATTCTTTAATTTTATAAATGATTGATTTCCGCTTCTATCTTTGTGTTCAGACAAGAGAGTTCTACCTGTTT

>14485483

GGCAGGTTTTCACTATGTTGCCAAGGCTGGTCTCGAACTCCTGGCCTCAAGTGATCCACCCACCTTGGCCTTGGCCCCCCAAAGTGCTGGGATGACACTCNTGAGCCACTGTGCCCGACCAATATCTGGTGTTGAAGCGGCCAGGTATGTAGGACTTTGTTATGGCAGCCCCAGCTAACACTCCTCCACCTCTCAGCACCC

>14488789

GCATGAACCCAGGAGGAAGAGCTTGCAGGGAGCCGAGATTGTGCCACTGCACTCCAGCCTGGGCGACAAAGCGAGACTCCGTCTCAAAAAAAAAAAAAAANGAAGTTGGTGCCTGGTCCGTCTCATACCTATTGGATTGTTCCCAGTTTTTTTGAGTTTTTTTCTTTTTAAATTCCAAATCCTAGGAGATTGCCCTCTTTT

>14509656

CTTGTACCCCTCTCTTCTCCTCATCTTACAAAACTCAGATCCTGCTGTGCCACAGTGAATCAATTATCTGTGCACAGGGGCTGTCGGGTGAGGATCTGCTNAATAAAAGCCCTTAGCTCTATTCAAGTCACTTCTTTTCCTTCACCATGTGTTCAAGCAGAATTAATGAAGAGGTGTCCACCATGTTTACTAATATTTCTA

>14516697

CTTCAATACTTCCAGTGTTATTACTATAAGGGGTTCTATATAGTATTCGCTTTTAAAACTGCCTCCAAATGACTTCTTTCCAATTTCTATTTTGTACATTNATGTTTTCTCAAATGAAAGATTCATTTTTATTTGTTATTTTTATTTTTAGAGAGAGGAGCTCACTCTGTTGCCCAGTCTAGAGCGCAGTGGTACGATCAT

>14545124

CACCATGTTGGCCAGGCTGGTCTCAAACTCCTGACCTCAGGTGATCCACCTGCCTTGGCCCCCCAAAGTGCTAGGATTACAGGCATGAGCCACCATGCCCNGTCTTCACACATTAAGTCTTATATCCTCAACACATCTTGGAGAGGAAGATCTTCTTAGCATACCTCTCCTTTGTTGCCCCCAAATGGGATAACCATGGCC

>14578358

GTAGGAGAAAAAAGTTGGGTGGTATTTGGGATTTTCATCGTGAAGTGGGGGGATAAAAGAAAGACTAGCTGGCTCAACCAATACAGTTAAGGGTGAGGTGNTGTTTTGGGGTTTTGTTTTGTTTTGGTTTGTTTTGTTTTGTTTTGTTTTTTGAGACAAGCCTCATTCTGTTGCCCAGGCTGGAGTGCAGTGGAGCAATCT

>14590617

CCAGCCTGGGCAACAAGAGTGAAAGTCTGTCTCAAAAATAAATAAATAAATAAATAAACAAATAAATAAATAAATAAGATTAGATTTCAATTAAAAAAAANGAAGCAGTGAAAACACCCAAAAAGAAAGAAATTGTAGTTTACTTGCAAGTATTTTCTCTTTTCAAAATAGTAACTCCTAGCTCACCAACCTCTTTCCTAG

>14590788

TAACTCCTAGCTCACCAACCTCTTTCCTAGAAAAAGTAAGGTAAACACTAAACACTACTCAATAGTAGGTGGGTGCCTCTCTATGTAATTTTTTAAAAAANCTTCTACTACAGGCTGGGAATGATGGCTCATGCCTGTAATCCCAGCATTTTGGGAGGCTGAGGCCAGAGGATTGCTTGAGGCCAGGAGTTTGAGACCAGC

>14602056

GACGTTCTCTGTTACCAGTGATCACTACAGGCTCCCCTATAAGAACAACCTGGCCTGTCTTTGATCTCCCCAGCAATCTCCCAATTTTTTTTTTTTTTTTNGTATATTTGGTTTTTTAGATGGAGTCTCACTCTGTCGCCCAGGCTAGAGTGCAATGGCATAATCTCAGCCTACTCCAACCTCCTCCTCCTGGGTTCAATA

>14636181

CTTCCGTGACCAAATCTGTGCATGGTGAGACCTTCTAAAACTACAGCTATCTACTGTTTGTTTTGTTTTATTTGTTTGTTTGTTTGTTTGTTTGTTTGTTNTGAGACAGAGTCTTGCTCTGTCACCCAGGCTGAAGTGCAGTGGTGCGATCTTGGCTCACTGCAAGCTCCGCCTCTCAGGTTCACGCCATTCTCCTGCCTC

>14637682

CTATATCCCCAGACAAATGAGAGCCAGTGCTTCCTCTTGCCCAGGGCACGGAAAGTTCAGGGCAGACATGTGCCCTTTTATTGTGTGTATGTGTGTGTGTNAGAGTGTGTGTGTGTGTGTGTGTGTATCCAGTTTTCATCTGTACTGTTTTCCTAGGTCCCAGGTCCACTGCAGAAGAGTCCTGGACAGGTCTTGAATGGA

>14641967

GCATTTCACTATTGCCACATTTAGTTAACCTACATTTAACCTACAGTGCCTACAACTTTACATTTAAAGGAATTCGTGGACCTTGTTGTTGTTTTTTTTTNCCTGATTTGCCACTCAGTTTCACCTCTTTTCATGATCATGGCTCAACGTTTCTTTGCTGTGCCATGACTCCAAAGTCTGTTTTACTGGTTACTTTCCCTA

>14643083

TGCCCTTTTTAAAACCTCAGGCTGAATGAAATGATTATTTGACACTTGGGGTATGTTGAACTCAAATGGTTTGGATACCTGGAGAGAGATCTTTTTTTTTNCCTTTTCTTTCTAACAGTAATGGGTTTACCAAAGTGAAGATTACAGAGGTCAATAGGAAAAAATAAGTCATTGAGGTCTGCTCCACTCCTCTGTTTCATG

>14662199

TGGATGGGAAGGTAAGTGGTGGATGGATTGATGGAAGGGTAAGTGGGTAGATGGATGCATGAATGGAAAAGTAAGTGGATGGATGGATGGATGGATGGATNAATAGGTAAGTGGGTGGATAGATAAGAGGGAAGGTAAATGAGTGAGTGGATGGATGGATGGATGGATGCATGGATGATGGATGGATGGATAGTGGATGGA

>14664254

CTGTTGACTGTGTCCAAGTCCAGTCCCCCTCCCAGGCTGGGCTGAGATAACACAGGCACCCACTCAGAATGCTGTACAGATACATAGATGGATTGATTGANCATTGACAGGGTCTCACTCTGTGGCCCAGGCTGGAGTGCAGTGGTGCAGTCATGGCTCTCTGCAGCCTTGACCTCCAAGCTCAGTCAATCTTTCCAGTAG

>14671972

TTGGGAGGACCCAGGACATCCAATTAGAGAATGCCCAAGGGTGTTCAGCATAATTATTTGCTTGGTTGGTGAGTTTTGGGGCTCTATCCGTGAGTTTTTTNGTGTTGTCATACAGCAGGACAGATTGATTTAGGTTAAAACAACAATTTTCATTTAAAAATACACAGAGTCCCCTTTTTTTAGCAGTGAGTAAGTCGAGGC

>14678914

TTTTGCATTTCCAAAAGTGTATCCAGAGTTTCCTGAATATTTATTTTTTCTTTAAGCTATATATTTCCTTGAATATTTCTCCCTTCACTTCTTTTTTTTTNGAGCCTCTGTCACCCAGGCTGGAGTGCAGTGATGCAACCTTGGTTCACCACAACCTTCTAAGGGAGGAGACCACCCCTCATATTGTCTTATGTCCAATTT

>14705419

ATCTGGCAACAAATATTCCACTTCCTGTCTGTGTGAATTTGATTACTTACATGAGTGGAATCACACAATATTTTTTATTTGGTGACTGGCTTGTTTCATTNAATGTATTGACTTTGACACTCATTCATTTTGTAGCATGTGTCATAATTTTCTTATAAGACTATTCCATTGTGTGCATAAGCCATGTATTACTTTTATTTG

>14714323

TTAATAATGTGGTGAAACAGTAAAAGGATTCCATTGAAGGGGCAAGCAGAGATGTTAAAGATTATGTAGGTTTTCACTTATCTTTTTTCATTTGTTTTTTNAAGTAGGAAGGGGTTTTTCCTCAGGATCAGTTGTAGGAGCCTTTTTAGTCTGGGATGTGTCCTTCTGAAATAGGAGATGCAAGTCCTCCAATGGCTCACA

>14719597

GGGAATAGCCTTTGTTAGGCCTGCTAGTCTGAGGAGGGATCCTAAAATTCCAGATAGTCTCCCCCTCGATGGGACTTTGGGTAAAAAAAAAAAAAAAAAANGTCTTTCTGATTGGTGAGCCTGGGTGCCTAAAGAAAGGAACACAGTCCCAAAATTTGTGTGAGAAATCATTCTTATAGGAGAAACTAGAAAAGCACCAGA

>14722984

TTATATGAACCCGCTCTCATCTCTTTAGCAGTTTGAGTAACTTCTCTTATCAGTAAAACTGTCTGTGCAACTCCCCTTATCTTATGCAGCTGCAGATATGNCTCTAGACAAGCACAAAGTGCTGCTTCTCTTGTATGTATAACTGTGGGTTTGTTTTATGTAAGGCCCCCTCCTCCCTGTGAAATTTCCCTTGATGTATAA

>14733890

CTCAGCCTATTCGCTGTAGCTGGTTCTTAGCAATGAGCACCATCTCCTGGCTTATCGCTCAAACTACAGGGCTCAATAAAAGCCCAATATAAAAAAAAAANCAAAGTAAAAGCCTCCAGCATAAGCCAACAAGTGCACAGGGCAATAGAAGCAAAGCCAAAACACTCTATGAGTTACACCCCATAGGGAAGGCAGAAAGGG

>14739803

GATCCCTTTACCGTTATGTAATGGCCTTCTTTGTCTCTTTTGATCTTTGTTGGTTTAAAGGCTGTTTTATCAGAGACTATGATTGCAACCCGTTTTTTTTNGTTTTTTTTTTTTTGCTTTCCGTTTTCTTGGTAGATCTTCCTCCATCCCTTTATTTTGAGCCTATGCGTATCTCTGCATGTGAGGTGGATCTCCTGAATA

>14761916

TAAGTCCTCAGGGAAAGTAAGCCTTCCAAATTTTACAACTTAACAGGAATGAGATTCACATTATTTGCTCAAAGTTGTAGAAGTTTGGAATAGGTAACATNGGTTATTTTGATTATAATACACAGTTCTTAAGTTTCTAGTAAAGATGTCTAGTGAAGCTGAATATCTACTGTGCCTATTAATCATTTGTTTCTTCTGGGT

>14766605

TGAATATTATGTTAGTTGATTTTCAGATGGTAAACCAACTTTTCATTCCTGGGATAACTCTTGTTTAGTCACGGTGCATGGGTTTTCTATTGCTTTTTTTNCTTTTTTTTTTTTGAGATGGAGTCTTACTCTGTTGCCCAGGCTGGTGTGCAGTGGCGTGATCTCGGCTCACTGCAAGCTCTGCTTCTGGGGTTCACACCA

>14771142

TTTTATATGTTATAGTACATAAATGAAGCTCTTGGATATAATATTGAGGAGGGAAACCAGAAACAAGTTTACTGCCACATGAATCTTTTTTTTTTTTTTTNGAGACGGAATCTCGCTCTGTTGCCAGGCTGGAGTGCAGTGGCGCTATCTCGATGCATGGCAAACTCCGCCTCATGAGTTCAAGCGATTCTCCTGCCTCAG

>14786391

ATCTGTCTTATTTCCTGGTTCCTTTTTTGTATACCCACTAAATAAGATTTGCATTAGACAAAAATATTTACCATTAAATAAGAAAACAATTTTTTTTTTTNGAGATTGAGTCTCCCTGGGTCGCCCAGGATGGAGTGCAGTGGCATGATCTTGGTTCACTGCAACCTCTGCCTGCTGGGTTCAGGCGATTCTCCTGCCTCA

>14797333

GCTTGAACCTGGCAGGCAGAGGTTGCAGTGAGTCAAGATCATGCCATTGCACACCAGCCTGGGCAACAAGAGTGAAACTCAGTCTCAGAAAAAAAAAAAANGAAAATTGTATAGATTGTTTATACAACTTTGACAAACAAATTTAATTGGCTTCATGCTGTTCTTCTTAAGGCTTATTGTTTGGAGAATTAGGTCTTCTTT

>14802111

ATCGCTTGAACCTGGGGAGGCAGAGGTTGCAGTGAGCAGAGATCATGCCACTACACTTTAGTCTGGTGACAGAATGAGACTCCATCTCAAAAAAAAAAAANTGATTTGTGAGATGAATTTGTTTTGAAAATATTAGCTTGTTTTCAGTTGTGATACATTTGAAGTTGGTACAGAGTCCATTTTCTTTTATGTGTTAATGTA

>14812084

GGATCTGGCCTAGTAAGATGCCTTCCAAAAGAAAACAAAACCTCTTGCATAGAAAAGCTCCCTGTATGTGGCAGAGAAAAGAAAAGAAAAAAAAAAAAAANCAGCTTACATTCAGGGCAGGGAAGGTGCTTGGGGTGGAAAAAGCCTCTTTATGCAAATAGATTCCTCGAGCAGGGAGAGAGACTTTTAACCTCTGCTTCC

>14817466

TGTTCAGCATATGTCTAATTGTTTTATTGTTGAAATCCTCTATTTCCTTGTTGATTTTTTTTTTTTGTCTGGTTGGGTAGAAAGTGAGTTAGGGAAATTTNGTACTATTATTTTGTTGCTATCTATTTTTTCCTTTAATCTGTTAATATTGCTTTATATATTTTAGAGCTCTGCTTTTTGTTGCATATTTACAGTTTTTTA

>14819066

TGTAGCGGTTTAATCATGGCAGACTTCCTATGTTAGAATCCCTTTTTCCACTAAGTACTGATTTGAGCAATTAACTTTTTTGTTTGTTTGTTTGTTTGTTNTTGAGATCGAGTTTCGCTCTTGTTGCCCAGGTGGGAGTGCAATGGCGCAATCTCGGCTCACCGCAACCTCTGCCTCCTGGGTTCAAGCAATTCTTCTTCC

>14819689

TTTTTCTTGGCAGTGTGTTTTGGACACATAGATATCACTGATTATTCTTTTCTACCTTGCTTTGATTTCAAGTTTTAATTTTTTTCTTTTTTTTTTTTTTNGAGGTGGAGTCTCACTCTGTCGCCCAGACTAGAGTGCAGTTGTGTGATCTCAGCTCACTGCAAGCTCTGTCTCCCAGGTTCACACCATCCTCCTGCCTCA

>14825731

AGATGTTTGCCTGTAGCATGTTTCAAACTTTTTATTTTTCATCTTCTGCAATTTGAATGTATTTCTAGATGTACTCTTTTTTTTGTTTTTTTTTTTTTTTNGGCATTTATCTAGCTTGGAATTCTCTGAGCTTCCTGAATCTCTTGTTTATTGTATGGCACTAATTTGGGGACTTTTTTAGTTATAATTGCTTCTTTTTTT

>14833222

TAGCGGTTGCTGATTTCTGTTAGAGTGTATTTTTCATAAGGACTAGAGAACTGAAACTGTTAGTAAATCCTTAGTGGCAGACAGAAAAGATTTTTTTTTTNGTATATATAAAAGCAACAAAAAGGATAGAATCAGTTTACCTTTAATAGATTATATGTATTGAGGCATCTTTTTAAAAACGAAAAGAGATATTTGGGAATT

>14847087

GAGCAAGACTCCGTCTCCAAAAAAAAAAAAAAAAAAAAGAGGAGGAAGAAAAGATTGGTAGTAAAACATCCTTTGTTCTCTACTCCCTCTTTTTGATTTTNCTCCTAAAACTTGACTCTAGAAAATGATATAAAAATCTTTCATTTTACCTTATTTCTTAATTCTTAGTTTATTCATTCTTTTCATAACTTCTGAAGTCGT

>14860094

CATGAGAATGGCTTCAACCCTGCAGGCCGAGGTTGCAGTGAGCCGCACTGCGGCACTCCAGTCTGGGCGACAGAGCCAGACCATGCATCAAAAAAAAAAANCAGAAAGAAAAAAAAGTTACTCCCCATGGTTAACCCATTGACCTCTAGCACTAGCAAGGCCACACTGTAACTGCTTGCAGGTGGGCTGACCATCCTTTAG

>14866162

GTATATATATATATGCCTATATATATACATATATACCAGTATAATATACATATTATAAATATATAGATATACATGTTGCGTGTGTGTGTGTGTGTGTGTGNATGTATTCCTTCCAGACAGGGCCTCAATCTGTTCGCCCAGGCTGGAGTTTAGTGGTACAATCACACTCACTGCAGTCTCAGCCTCCCAGGTTCAAGCAAT

>14875232

TTAGATAACAAAGTAACATTAAAATTTTACTTATGGCAAAAATGAGTACCCTTGTCTCACTACTTGAATTTAGCCAGGAATACTTCCTGAATGACATTTTNCAAAAACCTTTATGTGCATCAACAAACTATCAACCACTTTGTTTATCTCATTGAAAGGATGGTATTTGTGATGATTTACTTACAAGAGTATTATATGTCA

>14881836

GTGTGTTTGAGATGGAATCTTGCTCTATCACCTAGGCTGGAGTGCAGTGGAGCAATCTTGGCTCACTGCAACCTCTGCCTCCCATGTTCAAGTGATTTCCNTGCCTCAGCCTCCTGAGTAGCTGGGACTACAGGCGTGTGCCACCACACCCGGCTAATGTTATATATTTTAGTAGAGACCATGTTGGCTAGGATGGTCTCG

>14912724

TACTCCAACTGAACCTAAAAACTAGACTTTATAAACATTATAACTTAGATGTTTATACTGGAACAGGAATTAAAAGAAATTAAAGAGTGTGTAAGCAAAANCTCAGTTGTATGTAAGAAAACCCAATTTCCCCTGAGGAAGAGAAAGAGCTGGAGTACTTTAAAAAGTAACTGCCTGTTTTTCTGTGGCTAGTGAGCCTTA

>14915190

CTTGTTAGCTGAGCCTGTGGCCCTGGCAGCAGTCACTGGGCCAGACATCTGAGGCATTAGTGGGTAGATCTGGGGTCTGTTCTCCATCCCAGCCTTTTTTNCCCTGGGGTCTGATAAAGCTCTGCCTGGCTTCTCTGCTGCCACCTTGAGCACCACTGTGTCCTGCTGATGTGGCTCAACAGGGTCCAGTTTTTCAGGTTC

>14969057

ATTTCTGTGAAATTGTCTAAAAATCACATACCTGAGAGAATTCAGATATTCTTTTGTTTGTTTTTTGTCTTTGTTTGCTTTTGCTTTTTCTTTTTTTTTTNGAGTCTCACCCTATTGCCCAGGCTGCTGCAGCAGCGTGATCTCGGCTCACTGCAACCCCCACCTCTCAGGTTCAAGAAATTCTTCTGCCTCAGCCTCCCG

>14980846

GAAGGCCTGAGTTAAGCAAAAAATTAAAACTCTCCTTTAAGTTAACAGAAATTTCTCCCATCTGACTGCCTTCAAACTGGGATATCTTTTTTTTTTTTTTNGACATATTCTAACTGTTGCCCAGGATAGAGTACAGTGGCTCAAACCTGCTAAGCAGAGGTTACAGTGAGCCAAGATCGCAATACTGCAACCTCTGCCTGC

>15026658

GAAGGTAAAGGTTTTGTTATAAAATCAGACATTTTTGTTTTAAAAAGCTTTGCAAAGCCCTGTTGACTTTTCTAACGGATGCCAGATACACCTTATTTTCNTTTTTTTTTTTTTACCCCTTTCACCCACTGAAAATAAGTTTGTAGATGTAATCTGCAAATTATAAAGAGAAAGTGATGAATTTTTAAAAACAATTGAAGT

>15026671

TTGTTATAAAATCAGACATTTTTGTTTTAAAAAGCTTTGCAAAGCCCTGTTGACTTTTCTAACGGATGCCAGATACACCTTATTTTCATTTTTTTTTTTTNACCCCTTTCACCCACTGAAAATAAGTTTGTAGATGTAATCTGCAAATTATAAAGAGAAAGTGATGAATTTTTAAAAACAATTGAAGTTTTGGGTTATGAA

>15044950

TATTTCTGTCTTTAGACCTTTGAAGAATTGCCACACTGTTTTCCACAATGTATTGAACTAATGTATACTCCCACCAACAGTGTATAAGCATTCTTTTTTTNCTCTACAACTTCATCAACATCTATTATTTTTTGACTTTTTAATAGTAGCCATTCTGATTGGTGTAAGATGGTATCTCATTGTGGTTTTGATTTGCATTTC

>15047302

TAAAAAAGGAAAGATCTTGCAGTAAGAATTTCCCAGTACAACTTAAAAATCAGTGTGTGGAATATTAACACCAAAACAAAAAAGGCCCTTGGTTTATATTNGTGTCATTTAATGATTTCATTCATTAACTATTATTTTTTCCCTTCCTTTCCTTCCCTCCCTCCCTCCCTTCTTCCTTTCCTTTTCCTTCCTTCACTCCCT

>15047659

TCTCTCGTTCTTTCTTTCTCTCTTTATTTCTTTTTCTCTCTCTCCCTTTCCTTCCTTCCCTCCCTCCCTCTTTCTCTCTTTTTCTTTCTTTCTCTCTTTCNGTCTCTTTTTTTCCTTTTTTCTTTCTTTCTTTCTTTCTCTCCTTCTTTCTTTCTTTCTATCTTTCTTTCTTTCTTTCCTTCATTCCTTCTTTCCTTCTTT

>15047697

TCTCTCCCTTTCCTTCCTTCCCTCCCTCCCTCTTTCTCTCTTTTTCTTTCTTTCTCTCTTTCTGTCTCTTTTTTTCCTTTTTTCTTTCTTTCTTTCTTTCNCTCCTTCTTTCTTTCTTTCTATCTTTCTTTCTTTCTTTCCTTCATTCCTTCTTTCCTTCTTTCTGTGTGGATGAGCCAGTCTTGCTCTGTCATGAGGCTG

>15047717

CCTCCCTCCCTCTTTCTCTCTTTTTCTTTCTTTCTCTCTTTCTGTCTCTTTTTTTCCTTTTTTCTTTCTTTCTTTCTTTCTCTCCTTCTTTCTTTCTTTCNATCTTTCTTTCTTTCTTTCCTTCATTCCTTCTTTCCTTCTTTCTGTGTGGATGAGCCAGTCTTGCTCTGTCATGAGGCTGGAGTGCAATGATGCAATCTT

>15055152

TTCTTGAACCCGGGAGGCGGAGGTTGCAGTGAGCCAAGAATGCACCATTGCACTCCAGTCTGGGAAATACAGTGAGACTCCATCTCAAAAAAAAAAAAAANTTAAGTGTGTTTGTAATTTTTCACATCATTTTTATCATGGCTTCTGCTGTAGTTTGGACATGCTTTGTTTGGCTCCGTCAAGCCTCATGTTGAAACATGA

>15064866

CTGATTTAACTTGGTATGACATGCAAATATTATTATCCACTTATTTACTTATTTCCTTCTTTCCTTCCTTTCTTCCTCTTTTTTTATTTTTATTTTTTTTNAGACAGAGTTTTGCTCTGTCACCAGGCTGGAGTGCAGTGGCACAATTTCAGCTCACTGCAACCTCCACCTGTCAGATTCAACGATTATCCCTGCTTCAGA

>15066209

GCCTGGGGGCGCTGCAGGAGGCTAGGGCGTGTTTCATCCCTATCTACAACTGCATAAGGTGGACACCCCCAGAGTGGCCATTTTAGAGGCTCTGCCTGGGNAATGCATTCTTTTCCCAGGGCTGTTAATTATTAATATTCCTTACTGGGGAAAGAATTCAGCGATATTTCTCTTACCTGTTTTTGGCAATAAGAAATATGG

>15084485

TCACACCACTGCACTCCAGCCTGGGCAACAGAGTGAGACTGTCTCAAAAAAAAAAAAATTACCTATTGTCAGTTTGTATGTCTTTTTTTTTTTTTTTTTTNGTAGGTAAGGAGAACAAGGTCCATTTTGTTACATGGATAGGATATATTGTGTAGTGGTGAAGTCTGGACTTTCAATGCAACCATTATGCAAATAATGTAC

>15088610

AGTACAGAATGAATCACTGGGGAAACAAGCACACCTGTGATGTTTGCAGATGGCTAAGTCAAAGAACAAGGGTGGCTATCAGGGTCAACCAAGCAGCAAGNTGCCAAGGCAGTCCCCAGGGGTTGTTTGCAGAGGATACTGGCACACTTACACACACAACTGAGGTAACAATAGCCACCCATACCTTGGAATCCCCAGATT

>15104925

TTGAACCCAAGAGGCGGAAGTTGCAGTGAGCCAAGATCACACCATTACACTCCAGCCTGGGTGACAAGAGTGAAACTTCATCTCAAAAAACAAAAAAAAANTGCTTTTCCCATTTAAGCAAAGTATATCATTACCATTTTAATAGGTATTACATTGAATTTGTGGATTGCTTTAGGTAGTATGGACATTTCAACAATAGTA

>15106787

AACGGGGCAGGGAGTTTCACAATGTTCTTCTATACAATGTCTGGAATCTATGAATAACATCAGTTTCTAAGTTATGAATTGATTTTTAACTACTGGGTTTNAGGCCATGCAGGCCCAGTCCTGGTTTCAGACCTGGCGCCGGGCTGCCTGTCTTTGGTTTTACTTCCTTGTTGTTTTTTCTTAAAACAGGTACTGAGTATA

>15108931

TAAAATATGAGCTTAATAGAGTGTAGTAGGTATAAGCAGTAGGCAAAGAGAGAGAATTAAAAATGAATAAATTATTTGGCTTAGTCTTTTTTTTTTTTTTNAGCATAATGTTTGGGGCCTGTGTTGTTTGTGGAAGCAGCATTGTTGAGGCTGCAGTTTCTGTAGGGTTTTTTTTAGGCTGGCTTGAATTTTTTCTTTTTT

>15138027

ACCCCTCTAGTAAATTTTTTACCTCTGTAGTGAAAATACAGTTCAGTTCAGAATTTCTTTTTGGTTCCTTTCTATGTTTTTTTTTCTTTTTTTTTTTTTTNGTGAGACACAGTTTCACTCTTTCACCCAGGCTAGAGTGAAGTAGCATGATCTTGGCTCGCTGTAACCTATTCCACCCAGGTTCAAGTGATTCTCCTCCCT

>15158805

AAAAATCTTCAATATTACTAATCATTACAAAAATTAAAACCACACTGAGATATCATCTTACACACCAGAATGGCTATTATTAATAGGTCAAAAAAAAAAANGATACTGTTGGTGTAAATGTAGAAAAAAAGGATCAGATACATTTTTGATGGGAATAAAAATTAGTTCAATGTCTGTGGAAAATAATATGAAAATAGCTCA

>15185831

GGCAAAATAACCAGCTAACATCATGACGACAGGATCAAATTCACACATAACAACATTAACCTTTAATGTAAATGGGCTAAATGCCCCAATTAAAAGACACNGACTGGCAAATTGGATAAAGAGTCAAGACCCATCAGTGTGCTGTATTCAGGAGACCCATCTCATGTGCAGAGATACACATAGGCTCAAAATAAAGAGATG

>15197928

TTTTCTTTAACCCATGATGTGGTTTAAGATGAGTGAACCAATGTTCTGTTTCTGATTTTGAGGCAATGTATGTACCACTAAAGCTTTTCACTTACATTAGNCCTTCATATTTTATCGAAGTGTGTTATCCATATACAAGGCTGACTGCAAACTCCTTCACAAATGAAAGTATACCTTGTAAGTGCACATATCAGACCACTT

>15212347

TTCACCTAAAAAAAATCAGTAGCATTTCTTTAAATTAAAAATGATCTAGCTGAGAAGGAAATCAAGAGGGAAATCCCATATTCAATAGGAACAAAAAAAANCCCTAGGGAAATATATTTAACTAAGAAGATTAATTAATTAATTTTAACGAAGAAAAACTTAAAAAAAGATTGATAAAACAAATTGAGGATGACACAAATA

>15254659

CAAGGAAAATATAACATACCAAAACTTATGGGATACAGCTAAAGCCATGCAGTGACAGAAATTTATGGATGTAAATACGCACATTCAAAAAGAAAAAAAANGACTTAAATCAACAACCTAATTTCACACTGAAGGGAACTAGGAAAAAAACAGATGAAAGTGAAAGTTAGCAAAAGGAAGGGAAAAAGAAACAGATTAAAG

>15315479

TTGCACTTGGGAGGCGGACGTTGCAGTGAGCCGAGATCATGTCAGAGCACTCCAGCCTGGGCAGCAAAGCGAGATTTGGTCTCAAAAAAAAAAAAAAAAANTTATGTATACGCATATAGTGCATTCTTCCAGAGTCCATAAAAAGACACCAAACTGGTGATGCGTTTACTAATTTCAACACTTTCAAAAATTAAAGTTTAC

>15316706

TGCAAGCTTCCAAGTTCTCCTCCCAGTTCCCTCCCCTTTCCTTCCAGTTCTCCTCTCCTTCCCAGTTTCCTCCTCTTTCCTGTGCCTTCGCTTAGTATGTNCTTCCCATCGAGGCCCGCCTTGTATTTCCTGGATCTGGTCTCCAGGAGAGCTTGGTAACAAGTAAACCCACAAGCATCATAGCTCCAGTCTGGCACCACA

>15348217

AATCACAAAATATCAATAAGGAATAAAATACATTACTGCAGATACTATACTACTGAAATTATAATAAAAATACCATGGGGAATTCTGTAACTTAAAAGAANCAATTCTTCAAAACTCACAATCTGGCAAGTCAATCAAGATATAAGAGAAAATCTGAATAGTCTGTGACAACTAAAGACAATGAATTTTTACTTTAAAAGT

>15350759

GAACCCAGAATCAAAGCCAAAGTGCCTTACCCAACCAATGCCACAGATTCATCCTCAGAAATATGTCCTTCTCTATGAAAGGGAATTAAGAAAATTGGAANTGATTGATACACCAGTTATGCAGATATCAATGAAAAGACACATGAGAAAGCAAGTTAATATGACATTTCCAAAGGACATAATAATTCTCCAGGAATAGAT

>15374307

GTTTGCATGATGTTACAAGGCTATTTAATTAGGGATTAGGGATTTCCAAACTAAGTAATTTCAGGCTTCCTCTTACTATGTCTTCCATACTCTCTTCTGCNCACCATCTGTCAATTTTTGTACCTACTCACCCCACCACCCTGTGCCATTGTCATGAAGATAAAATCCTTGGGGCTAAAACAACATTACGTTCCCCCAAAT

>15381487

AACTGTTTTGTCTTGGTGGCCCTTCCAGGCTCCACTGTGGGCATGAAAAACAAAACAAAACAAAACAAAACAAAACAAAACAAAACAAAACAAAACAAAANAAAAAAAAACTGCAGCTAGCTCAGTGTCTGCCCAAATGGCCGCCCAGTTTTGTGCTTGAAACCCAGGGCCCTGGTGGTGTAGGCACCTGAGGGAATCCTC

>15385550

TAAGTTGCAAAAAGTGAGGATTTCCTTTCACTTTCGATAAAGTCATTTTAAAATTAAAATCAAGAGTAGAAATCTTTATTTTGATGAACACAGATAAAGGNCAGGAACAAATACCTTTTCACTAATTTTTTTAAGCTTTAAGGTAAATTTAGTAACATCTCATAATACAAAATGAAAATTATATACTATATGTAATAAACA

>15385874

ATATATGACACAGCAACATTGTATCACAGCAACTGTTGTGGATACAATCAGGAAAATACTACACTGCAACATTATTTCCACTACTTCAAAAAAAAAAAAANGTCTAACCTGTATCAAATACAAGGAAATGAACCAGATAGATAAAAAAATAGGGAACATTCTAAAAACAACTGGCTTGTTTCTTTTAAATCTGTTTCTTAA

>15399434

GTCCCTGGATTGAAAAAAGAGCCTCTCCCACTCCTCCTACCACCGAAGTGGTTAGGACTCTATATAAATAAAAACAAGGCTTTTGGAAAAAAAAAAAAAANTTTGACACTTGTGCTGCTACTGATAGTAAGCAGCATAGAATAAGATGCGGTGCTCTAAATCACACACACACAAAAAAAGTTACACAGTAAAAAATAAGTA

>15400181

AATATTGCATAGCTAAAAACGAAAAGAATTCACTCATTCTGTAAGGTGACTTAGTTGTGTAAGGCAAAAACTGTATAATAGTACCGCAAAAAAAAAAAAANCCCACCAAAAACAGTTACATGGTGGAGTTCCAATTACACAGAAAAAGATCCATTCAGTAAATTTCCAAAGTTGCAGACTATTTAGGCCCACCCAGAATTC

>15400687

CATAGGGTTACAAGCTGTTTTAGAAATTATTACTAATAAAACCGATCAAGTCTTGACTGTTCCTGCCCAGCAAGAGACTCTGATGAAAAATACTATCTATNAAAATAGACTAGCTCTTGACTACTTGCTAGCAGCTGAAGGAGAAGTTTGTAGAAAATTTAACCTTACTAATTGTTGTCTACACATAGATGATCAGAGGCA

>15411145

AATCAGGTTGAAAGGTGTTTTATTTCTGAAAAAGAAAATAATGAAAAATCAACTTGAAAATTAATCAAGTTAAAAAAAGATTTAACAAGAGTTAAAAAAANTGCTTCAAGTTTTTATTCCATTAATACTTTGTATCACAGGGCTAGGTGTGGTGGCTCACACATGTAATCCCAGCACTTTGGGAGGCTGTGGCAGGCAGAT

>15447239

TACAGGTTGATATGTGAGGCAAACCACCATGGCACATGTGTACCTATGTAACAAACCTGCACATTCTGCACATGTATACTAGAACTTAAAGAAAAAAAAANCAACCCACAACTTTCAACATAATAAATTTCCTTATGACAAATTTAAACATATAAAACAACAAAAAAAATTGTTGTTTTATATGAGTGACTCTATAAATCT

>15448229

CTGGTGATACTGGGCTGACCCAGTGGAAAACAGAGGTTGTTCTTCATTAGGTCCTGACAAACATGAACTCTGACTTTTATGAAGCCCCTAAAAAAAAAAANTTGAAATTTAATATCATGGGAGCTGAAATGCATATACAGAAAACTCTTGAGGATTAAAATGTTAAACACAAAGCCACCATAAATAAACTAAATTTTGTGT

>15449414

AGCCAGTAAAATATATCACTGAAAAAAACATCTCCCTTGAATATAGACAACAGGATCCTTAAGAACACATTAGCATGTCAAACCCAGCAATATATAATAANTATGCACCAAGACAAACGAGGATTTATCTCAGAAAGCCAGTAGGTTTGCATGTGAAAATCAAGCAATGTAATACCATGCTATTAGAATAGAGACAAATAA

>15450088

CAGGTACAAGTGACCCTTGTGCCTCAGCCTCCCAAGTAGCTGGGACTACAGGCACGTGCCAACTGGCCTGGCTAATTATTTTCTTCTTTTTTTTTTTTTTNAGTAGAAACGGGGTTTCATGGCTGGGCGTGGTGGCTCATGCCTGTAATCTCAGCCACTTTGGGTGGCTGAGGCAGGCAGATCACCTGAGGTCAGGAGTTT

>15476027

TTATTATTTATCATTAACAGAAGACCAATATTTTTAATAAGGAATAATCCTAACAATAGTCTCCCTTTAATATAAATATGCTTTCCTTTCAAAAAAAAAANCATTGTACACAAAGTTAACAGAAAAACTAAATTTGAACATGTCTGCATGTCAAAGTTACACAAAATGAGCTACCCTATGTAAAAAAAAAAAAAACCAAAA

>15476121

AAAAAAACATTGTACACAAAGTTAACAGAAAAACTAAATTTGAACATGTCTGCATGTCAAAGTTACACAAAATGAGCTACCCTATGTAAAAAAAAAAAAANCCAAAATTTACCACTGAAACAAATCAGAGCAATTAAATTAAGATATAACCTTGTTTTGAAAAGGTGCCTGACAGTTATAATTGAATCCTCTCAAGAGTTA

>15483257

GCATTCAAGTCAGAAAAGCAAGTAAGCTCATTTTCCTGAGATGATATGATCTATTAAAAAATTATTAAGCATACACAACCACACACACACACACACACACNTGCACACACAGCAAAGTTGCCAGATTCAAAATCAACATTCAAAAATTAGTTGTACTTTAGTCCCTCCTTATCTGCAGTTTCACTTTCCATGGTTTCAGTT

>15491537

CAGAAGGAACCAGTGCTGTCACAGGGAAATCTGAACTGTGAGTGACAAATTACAGGAGCTCAGCATGGACACATGTGAGAGATACAAATACCAGGGGGACNAGTTATCTGGGGCACACACATAAATTTCTGAGTTTTACCTCCAGTTTCTCACAGTGAATAATGAGGGAAAAAAAATTCTCCCAACCTAGCTATCCTGTCC

>15495181

GATTGCTTCAGCCTGGGAGGTGGAGGTTGCAGTGAACTGAGATCATGCCAGTGCACTACAGCCTGGGTGACAGAGTGAGACTCTGTCAAAAAAAAAAAAANCAACCAAAAAACTGGCTGGGCGCAGTGGCTCATGCCTGTAATCCTCAGCACTTTGGGAGGCCAAGGCGGGTGGATTACGAGGTCAGGAGATCGAGAACAT

>15502045

ATATCTGTATGTTAATTTTGTATCCTGAAGCTTTAATAAATTTGTTTTTTTCTTTTTGGTTCTAATAATTTTTCCTGGAGGTGTTAATTAGGTTTTTTTTNCATCTATATGATCATGACTTCTGCAAACCAAGACTTCTTTTCCTTTTTCTTCCCAATAAGTATTTCTCTATCTCTTCATCATAACTAACTGCTCTGGCTA

>15517004

TGATTGAATAAGGTAAGAAAATCCGATATATATGTGTACATATGTGTGTGTGTGTATATACATGTATATAATAAACATACTGTTCATCCATTTAAAAAAANGAAAGTATCAGTAAGTTATTTCTTCTTTCAAATGCATGTAGTTACAATCCTGATGAGGGAAAAAAAAATGGTACTGTGTATATCATTTCGCTTAAAGCTG

>15522547

TTGCTATAATAGGTGTAGATTTCTAATAAGACCTATACAAAGCAATAATCAATAGTTAAATCACTGGTATGACATCACTAACTGGCCTGTTCTCTCTCTCNTTGGTGGCAGACACACAAAATAATGTTGATGCTCAAAGGAAATCAAAACCTTCACCATCTCCTGATTATATAAAAACTTTTAAAATTAAACAAAACAAAA

>15523167

ATTCTGGTTATTTAATTTTATTGAAAGTACCAACTTTATAAAAAACAGTATGAATGAACGGAAAAGATTAGAAAGGGATAAGAAAGTGCATAATCCTTTTNTTCTCAATTCCGTCAACTATTCAAAAATATCTAAAGGTTCAAGAAAAAATTCAGTGGAAATTACTACAAATCTTTCTGAAACATTCAAGGAAGAACAGCA

>15565955

ACTTTGGGAGGCCGAGGCGGCTGGATCACCTGAGGTCAGGAGTTCGAGACCAGCCTGGCCAACATGGCGAAACCCTGTCTCTACCAAAAAAAAAAAAAAANTAGAAAAATAAAATAAAAAAAGGCAAAAATTGGCTGGGTGTGCTGGCACGTGCCCATAATCCCAGCTACTCAGGAGGCTGAGGCAAGAGAATTGCTTGAA

>15588729

CTTATAAAACATAAGTTACAGAATTTTAAGGAAATCTATTGTTACAACCATCCTAATGGTTTGATATGCGGGTTCACGTATGAGGTCAAAAAAAAAAAAANTCAGAGAAACTAGTCGTTGGGATAGAGCATCCTCAATGTCCAGAAAACTTGACAGGGAAAAAAGCATATTTATAACAATATTTTAAACCTTTAGAAGCTT

>15593750

TTTCTCATATTATATGGCATATGTATGTTGAGGAATTGTGTATATTTTTCTATGTAAAGAATCTATAAAAAGTCTCATATATATTAAACGCCTCTGTTGANTACTGTTTTCAAAAGACAAATTGCATAATATTCCATGTATCAAATAGTTTACTGGTTATACCTCCAGATATTAGATATTACAAAAATGTTAATTATTAAT

>15599745

CTTGTAGGGTTTCTGTTGAGAGATCTGCTGTTAGTCTAATTGGCTTCCCTCTGTAAGTGACCTGACCTTTCTCTCTGACTACCCTTAACATTTTTTTTTTNAATTTCAACCTTAGAGAATCTGATGATTATGTATCTTGGGGTTGATCTTCTCATGGAGTATCTTGGTGGTGTTCTCTGTATTTCCTGAGTTTGAATGTTG

>15622613

ATTTGAGCCCAGGAGGTGGAGGTTGCAGTGAGCCGAGATCATGCCATTGCACTCCAGCCTGGGGGACAGGATGAGCCTCCATCTCAAAAAAAAAAAAAAANGATTACAAAATACAAAATTAGCCAGGCATGGTGGCTTGCACCTGTAATGCCAGCTACTCGAGAGGCTGAGGCAGATGAATTACTTGAACCCAGGAGGTGG

>15641936

ATGGGTGCAGCGCACCAGCACGGCACATGTATACATATGTAACTAACCTGCACAATGTGCACATGTACCCTAAAACTTAAAGTATAATAGTAAAAAAAAGNAAAAAAAAAAGAAATTAATCCACGTTTCCTATAATAAAATATTGGTTAAACAATTTAAAAAAAAAGAAAAAAGGTCAACAATTTGGAAAACATATGTGAG

>15641946

CGCACCAGCACGGCACATGTATACATATGTAACTAACCTGCACAATGTGCACATGTACCCTAAAACTTAAAGTATAATAGTAAAAAAAAGAAAAAAAAAANGAAATTAATCCACGTTTCCTATAATAAAATATTGGTTAAACAATTTAAAAAAAAAGAAAAAAGGTCAACAATTTGGAAAACATATGTGAGTAAAATTTTT

>15642285

CATATATAGAAAAACCTAATATCATATAAAAATGGAACCCTATCAAGCTATCAGTTCACTTCTCAATAGAAAAACTACAAGCCGGAAGAAATAGGGGGGGNCCTATTTTCAGAATTCTTAAAGCAAAGAAACTTCAGCCAATAGTCTCACACCCTGCCACTAAGCTCTATAAGTGATGGAGAAATAAAATGTTTTTCAGAC

>15646556

ACCATTATATAGTGCACTTCTTTGTCTCTTTTGACCTTTATTGGTTTAAAGTCTGTTTTATCAGAGACTAGAATTGCAACCACTCCATTTTTTTTTTTTTNGCTTGCCATTTGCTTGCTAAATCTTCCTCCATCCCTTTAGCCTATGTGTCTTTGCATGTGAGTTGGGTCTCCTGAATACAGTACACCAATGGGTCTTGAC

>15699410

AACTCTCTCTATTTCCAGATGAAAGAATTCTCTATCTAGAAAAGCACATATTCTCAGTCCTAAAGCTCCTTAAGGTGATAAACAATTTCAGCATTTCAGCNAAGTTTGAGGATACAGAAATCAATGTAAAAAAATCACTAGCATTCCTATAAACAAACTTCAAGCCAAGAGCCAAATCAGGAACACAATCCCGTTTAGAAT

>15702178

AAACTTTAAAGAACTTACATTATTCAAAATTTATTTACAATATTAATGTCTAGTAAAAGAAAGATAATAGAAATACTCTTAAAATATTTGGAGTAATTTTNAAATAATACTTTGTTTTAATTAAAATTCTCCATTTAACATATACATTACCCTATGTATAGCATTTTCACCTTAGGAACTGTATTTAAAAGTAATCCATTC

>15710758

TTATGTGCTCACAAAGAACTTGGCGGCATTTTGCCCCTGCTCTAGTGATCTGTGGAACTTTAAAGATGGAAGAGATAATTTAGGGTATCTTGTGGAAAAANTTTCTAAGCAGCAAAGCATTCAAAATATTGTCTAGATGCTTCTAACAGCATATGCTCATGTACTTGCAAAAATAAATTACTTGAAACTAGAACACATTGA

>15717626

ACATTTTTACACTGTTTTTGGGAGTATAAATTAAGTCAACCATTATGGAAGACAGTGTGGAGATTCCTCAAGGTTCTAGAACTGGAAATACCACTTGACCNAGCAATCCCATAACTGGGTATATACTGAAAGGGTTATAAACCATTCTACTATAAAGACATGTGCACATGTATGTTTATTGCAGCACTATTTACAATAGCA

>15746741

TATACATTATTAAGCAGTATACTAACCATACTCTTTGCAATAGGACTAAATACTGTAGCTCCTGCTGGGATGAAAATCATAATCACATCAACCTTCTTTCNATCTTCCTTCTGACAGCAATTTACTCCTACATTTAACTCAGCCTGGATAAAATGATCTCATCTTCCAGAGCACCTTCCTTACCTTCCTATTTACCCTTTG

>15749590

AGAAAGACTACCTTGTCATTTTATTCATTTGTTTTCAAGAAGAAGTCTACTGGGATAAAGTAGGAAAAAATAAATGATAAAACATCTTTTTTTTTTTTTTNCTAAATGGGTCACCTCCTTGTATTTGGATTGTTTTTTCCATAATGAGACTTTGATATTCATGGTATTTACACTTTACAGAGATTAGCCTATAATTAGAAT

>15772958

TTTCCTTCTGCTTTTTCTCCACCTTTTTGATGGCTTTGGCAGTGTCAGACTCCCAACTCCTTGGGTTTTTGCACTGCATACCATAACTCCATGATTTCCTNGTCGTATTTAATGGGGTTTCCCATAGAGTTTAGGAACTTCCTTTCTTTCCATATTGCAACATCAGCATGTAGGATTAGATAAGCATACTTGCTATCTGTA

>15778387

CCAGGCAATGCCAGTTTTTCACTGTGTTTTACCTTTTGATTTTTCTTAAATTTCCTTAATATGGTGCAAATAGTAGAAAACTATCTTTTGGGTTTTTTTTNAATGTTGGGGTACCAAAAGGGGTTCCCCTTGGTCCACTCAGCCTTTGATATTATTGTAAATACCTTTGTTTTGACCCTATCAATTTTTATGTATGTATGT

>15780702

GTAACAGAGTCTTCAGCAACATTTCCCTTTTAACAAAAATTGACCCCCAAATCATTCATTTTCTAACAAAGAGCATCCTGAAGAGTAAAGCTGAAGATGTNGTTAAGCAAGCTGGACGACGGCACATAGGAATACCAGCAGCTGTGCCAATAGAAAAGGGCTATCTGAAAGTCAGGTATGTTCAACATGTGTACAGTAAAA

>15799080

GTGTGGGATATACAGTAGTTTGATCTTGAAAGGTGGGCCAAATTGAAGCAGGGACTTCCAGTTCCTAGGTAGATTTTAAAATTTCTCTCTCTCCCTTTTTNTCCCTTCCTTCCTTCCTCCCTTCCTTCCTTCCTCCCTTCCTTCCTTCCTTCCTTCCTTCCTTCCTTCCTTCCTTCCTTCCTTCCTTCCTTTTCTTTCTCT

>15801166

AGAAAGAGTTAAGATCACCTGAATCTCACTGCACCCCTACCCTTCTCCTATCTCCTCATAATCAAACTCTGGGTAATGAGAAAATGTTTTTTTTTTTTTTNAAATTTTTATTTTCATTTTCCTTCGATTCTTCATTGAAAAGAAATTCATGTAAAATAAAGTTCCACCATTTCAAAATGGACACTTTAGTGCATTCACAGT

>15801169

AAGAGTTAAGATCACCTGAATCTCACTGCACCCCTACCCTTCTCCTATCTCCTCATAATCAAACTCTGGGTAATGAGAAAATGTTTTTTTTTTTTTTTAANTTTTTATTTTCATTTTCCTTCGATTCTTCATTGAAAAGAAATTCATGTAAAATAAAGTTCCACCATTTCAAAATGGACACTTTAGTGCATTCACAGTATT

>15852375

TACATTTTTATAATCTTGTTGAAAGGGAAAATGTGTTACATGCTAAAATTATACCCAAATAGGGTATCTAGCCTTGCAAGATAATAAAAGAAAGCAGAGGNCTATAAATGGATGTGGTGGTCTTTTGTGCAAACAGCAGTGTATATTCAAAGACCCTATGCCGAAAGTAATAATTATTATTTGTAAAATCATTAAATTGGC

>15858696

CCTTTTCAGCCATCTTGGCTCCTCCCCATTTGGTTCTTAATTGTACCCTGTGCTGTACATTTCACCATTTATTTTTCTTGTGTGTGTGTGTGTGTGTGTGNCTGTGTATGTGCGTGTGTGTTTTACTCTTGGCATTGGTTTGGTGATGCAATTTAAAGCTGAGCAGAAGAGAACCAAGTCTGGAGGAGAAGGAAAACAGTT

>15859015

CCTGAAGTGAACTGCAATCTCTATGAGAAGATGCACACTCTTGCATCATCAAATGGGGGCAATTAGAAAGGAAGCTAGACCTCATCTGTGACTTTCCTCCNTTTACTTCACTTTCCCCTGATAACCAAAACCAGGATGACACTGTTCTGTTCATGACTCTTAAATGCTGTCATATTTAACTATTTGTTCTCCAAGTTTTTC

>15860773

TTACCTGGTTATGTCAAAAGTCAGAGAACTTCCATGTTTCAACTTGGAAGGTGAGCTGGATAATAAATTAGGTATACATGGGCAGAGTGAAAAAAAAAAANCTGGAATTTGACTGTTATTCTGACTTTACTAGAATGTTTTCCTTTTAAAAGTTACTTTAAGCTGCAATTAAAATAAATAATATGAGAAAGACCTGCGTAA

>15882442

AATAGTAATGTCATTCAGAGTCATGTAAAATTGTTTTCTTTCTGTGTTGGTCTTGCATTTTTTTCTTCTTTGAAGATGATTTTCTTTGTTTTTTTTTTTTNCAGACTTTTTGTCTTTATTAGTGGTTGACAGGGGCTGGGGAGGGAGGAATGAAAAATGATTGCTAATAGATATAGGGTTTCTTTTAGGGGTGACAAAATG

>15896500

CTGCACCCACCATGCACAGCTTCTCCCATTACCAACATCCCCCACCAGAGTGGGATATTTGTGACAATGGATGAACCTACATTGACACATCATCATCATCNGGGTCTGTAGTTTACATACACTTCACTCTTGGTGTTGTATGGTCTATGGGTTTGGACAAATATATAATGACTTGTATCCATAGTTCCATATATCCCTAGT

>15899075

AAACCATAACAAGGTGTGTCCTGCACAGGGCTTCTCAGGACTCTAATTCTCTAATTTTGTTTTAATTAACTCTTTAATATTTGCGAAATTAAAAAAAAAANTATTTCCAGAGATAACATCTTCTGTAATGAAAATCCTGCAATCTACTTTCTGTCCTTTTACCTGATCTCCCCTCCTATTCATTACTCCATCCCATCCATC

>15938096

ATGTAATATATATATGTTATATATATAATGCAGCATACTATATAGTATACACAGTATCTATATATGATGCCATATACAAGACCATATATATATATATACANACACACACACACATAATAGGCCACATTATCATGTAAGTTATATATAAATGTTGATTGATTTGACAAAAGTCTGGGTTTTCTAAGCATGTAGAGATATCAA

>15944476

CATCCGAACATGAGAAGGAACAAACTCCGGACCCACCATCTTTAAGAACTGTAACACTCACTGCAAGGGTCTGTGGCTTCATTCTTAAAGTTAGTGAGACNAAGAACCCACTAATTTCAGACACAATGCATGCACCCAAATCTCACAAATCACCAGTAAGGAACTTACTCATGTAACTAAATATCGCCTGTTCCCCAATAA

>15952221

GTCTTGATCTCCTGACCTCGTGATCCACCCGCCTCAGCATCTTCAGGTTTTAAAGATATTTTGTGAGTATGAAATTTCAGGTTGATTTTTTTTTAAAAAANTAGTATTTTAAAGATATAGTTTCATTTTCTTCTGTCATGCATATTTTCTGAAAAATCTTTGACATTCTTATTCTTGTTTTACTGTTTATGAAGTGTCTTT

>15952692

TTGTTTGTTTGTTTGTTTGTTTGTTTCTTTTTGGTCATTTTCCACCGTCTGCTTCATTTTGATGGTTTTTTTTGTTTTGTTTTTTGTTTTTTTTTTTTTTNGAGATGGAGTTTTGCTCTTGTTGCCCAGGCTGGAGTGCAATGGCATGATCTCTGCTTACCGCAACCTGCGCCTCCCAGGTTCAAGCAATTTTCGTGTCTC

>15953886

TTAGTCTATTTCTCCACAACTTGAAAATATGGCAGAACTATCTTGGGATCAGCCTTCCTTGCACTGTAGATTTGAAACTGCATCAAAATCATTCATTTTTNGGCAAAATTGAAATTCATCTCATTTGTGTCTTTTTAGGTTTTCTTGTCTTGTGCCAACTATTGTCCAATGTCTGAAGAAAGTGGCTGCATACAAGAGGCC

>15963776

GGGTGGGAGTGACCCGATTTTCCAGGTGCCGTCTGTCACCACTTTCCTTGACCAGGAAAGGGAACTCCCTGACCACTTGTGCTTCCCAAGTGAGGCAATGNTCGCCTTGCTTCAGCTCGTGCATGTTGCGCTGCACCCACTGTCCTGCACCCACTGTCTGGCACTCCCTAGTGACATGAACCTGGTACCTCAGATGGAAAT

>15964921

GAGACAGGATTTCTCCATATTGGCCAGTCAGGTCTTGAACTCCTGACCGCAAGTGATTCTTGATATTTCTAGTTTATTTCTTAACTTTATGGTTTTTTTTNCATATTTTACATTTTTGTTTTTAACTCTCTTCTATCCCCTTTCATCTCATTTCATTGTCTTACTATCTTGTCTTCATGCTCTTATATATAATTGTACTAG

>15967518

GACTTTGATAATGGTGAGGTGGTTTTCTTTTCTTTTCTGTTTTCTTTTCTCTGCTGTTCTTTTTTGTTTTCTTTTCTCTTTTTTCCTTTTTTTTTTTTTTNTTTTTTTTGTTTTTTTAAGATGGAGTCTCTGTCATCAGGCTGGAGTGTAATGGTGCAATCTCAGTTCACTGCAACCTCCACCTCCCGGGCTCAAGCAATT

>15981831

AAAGCGAAATGTTATCTTCTTTCTTTTTACGAGCCGTTAAAAGCACAACCAGCTGCTACTTGCTGCCTCCCACCACATGCACACACACACACACACACACNGAGACACATACACACACACAAGAAACCATACATGGATGTAAAAAGTAACAGATTCTGAATATGAAACTGTTCCATGCATTTAGACAATGAAAATGCCTTC

>15986629

ATAATCTTCAAGTGTACAGTTCAGTGACTTTTAGTATTTACTGACTTGTGCAACCATCACCATCATCTAATTTCTGTTTTTTCTATTTCTTTTTTTTTTTNGAGACGGAGTCTCGCTCTGTCGTCCAGGCTGGAGTGCAGTGTCGCCATCTCAGCTCACTGCAAGCTCCGCCTCCTGGGTTCACGCCATTCTCCTCCCTCA

>15997345

AAGATGCAAGCACATGTGTGTTCATTGCAGCACTATTCACAATAGCAGAGATATGGAATTTACCCAAATGTCCATCAACAGTAGACTGGATAAAAAAAAANTGTGGTGCATAGACACATAGAATACTATGCAGCCATAAAAAGGAATGAGATCATGTCCTTTGCAGGGACATGGATAGAGCTGGAGGCCATTATCCTCAGC

>16021880

GTGATTCTCCCAGCACGCAGCTGGAGATCTGAGAATGGGCAGACTGCTTCCTCAAGTGGGTCCCTGACCCCTGACCCCTGAGCAGCCTAACTGGGAGATANCCCCAGTAGGGGCAGACTGACACCTCACACAGCTGGGTACTCCCCTGAGACAAAACTTCCAGAGGAACGATCAGACAGCAGCATTCACGGTTCACAAAAA

>16040818

GGGGAGAGGCTTTCAGCTTTTATTACTTAGGTCCTGTAGAAAAAACCAAGGTGCATATAAAGAGATGCTGGTCATTGGTCTTTGCTTTTTTTTTTTTTTTNGACAAGAGTCTCACTCTGTCACCCAGGCTGGAGTGCAGTGGCATGATCTCAGCTCACTGCAACGTTCACCTCCCGGGTTAAAGCGATTCTTCCACCTCAG

>16061594

CAGACTGAAAGGTAGACAGACAGGTAGACAAAGAAAGACAGGCAGATAGGTAGATAGGTAGGTAGGTAGGTAGATAGATAGATAGCCAGACAGACAGACANTCAGAAAAACAGACAGACAGACAGATAGACAGATAGATAAACAGACAGATAGAAAGATAGACAGACAGACAGATCCACAGATAGACAGACAAACAATAGC

>16075600

AAAATGTGATGTTTGATTTTCTGTTCTGTGCTAATTTCTTTAGGACAATGGTCAGCTGCATCCATGTTGCTGCAAAGGACAGGATTTCATTTTTTTTTTTNATGGCGGCACAGTATTCCATGGCGTATATGGATTTCTTTCTTTTTCTATTGCTGCACAGTACCTCAGGGTGTATATGCACCACATTTACAAAAATCCAGT

>16184620

ATGGTCTCAATCTCCTGACATCATGATCTGTGAGCCTTGACCTCTCAAAGTGCCGGAATTACAGGCATGAGCCACTGAGCCCGGCCAAAACTTTTTTTTTNCTTAAAAAACTGAATTCCAGCCAGAATAGAAAGAACTTATATTTGCTGTGTGAAATGAACAGTCCATGGGGAGTGTCTATGTATCCACACACAAACGTAA

>16203611

TTGTTCAAATCACATTTACTTCTCTCTCACCCCTGATAAATCAATGCTAATTTGCCCTGCCCCATAGAGCATCCCTGAATTTTACAGTGTGTGAGAAAAANCTTGAAGTGAAAAGACAACTCTATCCCTTTTTCCTGTATATTCTATAGCAGTAGTATTCTCTGTAAAGTATCAGATAGTAAGTACTTTCATCATTGTCTC

>16212377

CATTGACTATGCTGAGGAGGTGGAGGAAGAGGAGGGTTGGTCTTGCTGTCTCAGGGGTGGCAGAGACAGAAGACATAGAGGAAGTCTAAGGGAAGGCAGGNGAGGCAGGTCACATGGTGTACTTTTACTAAATAAATCCACATGGACCCTCATAGTTCAAACCCGTTTTGTTCAAGGGTGAAGTGTACACTGACTCTAAGT

>16232848

CATATTAAGACTTGCTTGCTTCACCTTTGCCCGCTGCCATGATTGTAAGTTTACTGAGGCCTTCCAGCCATGCTTCCTTTACAGCCTGTGGAACTATGCANAAGTTAAACCTCTTTTCTTCATAAATTATCCAGTCTCAGGTAGTTGTTTATAGCTGTGTGAGAATGGACTAATACAGCCACTAAATTAGTTACAGGTGTA

>16244619

ACTGTCCTTCTCACTGATTTGATGTTCGTATCAACTGAAAACCAAAAAGCTGTGAGGCAACGCTCAAATGAAAATGAAGACAAGGCACAACATAAAACATNAAAGATAAATCAAGACAAAGTTCATCAGGAAACTCCAAATAATTTGATACTCCAGATGGCTCATATTGAGTAGTTTAAGTGCTTGGATTGTGAACTTAGG

>16257054

TTCATACCTGTAATCTCAGCATTTTGGGAGGCCAAAACAGGTGGACCACTGCATTCTAGTCTGGGTGACACAGCAAGACTTCATATCAAAAGAAAAAAAANTGTTAAATAGCACTTGATTAATAAATGAGGTGCATAGGAAATGCCAAAAAGTATCAAGGAATATTGGGGATTTTTCTGCTCAAAATTACTTAGAAGGAAT

>16264454

AGAAATAAGAGAATCAGATTCAGAAATTAAAGTGATGGGATTAGCAGAAAAGGATTTTAAAAGAGTTGTTATACTCAAAATGGTCAAGGATTAAAAGAAANCATGATTATAATAAGAAAAATTGGAAGGCTAAGAAAGAACTGCATATATATATGTATATATATACTGGAGATGAAAAATAAAATATATGAAATAAAAATT

>16269075

CATCTCTATTTTGTTTTTATGGTATAAGCTTTGTCACTGTGAGCAATGCATAGCATTAAATATTTTGGGGAAAGTAATAGAAGAAATATCACAGAAAAAANGTGGTTACAAAGAAGCTTGTGTCTCTGTCAGAGGAGTCTTATAGTCTGACAGTGGATCCCCATTTTATATGGGTAGGGGTATTTATTCATACTACTGGGG

>16273086

TTCTATAATAGGGACTAAGAGGAACAGGACAAAAAAGAAAAGCCAGAAAAGAGAAAGGCCACAGCCTTTGTCATGGCCCTCGGACAAACAAACCTTGGGGNTTAAGAGAAGACAGAAAACGGAGCAGGCCAATCAGCCAGTAGCATTTGTTTTCAGTGTGGTTTACAATAAAACCTTAAAGAAGATTGTCCAACAAGAAGC

>16283440

CCCATGCTTTAAACATCATCCCCTTTGAGTAAAAAGAGAATTCAATTAATCATCCTTTGGGAATAAAGGTATGAATAAGATTCAGTTGTTTGAAAAAAAANTCTTTGTCAATTATATGGGACAGAGATACCTATATGCACCTTAACCTAACAGCATTGCCTCACTGTAATTCTCCATTCATTGCACAATTCCATTCATCAC

>16293555

TCCCCCTTGTTCAGAAGTGCCATGTCTGTGCAACTACCCTGCCTCAGATTTTTGGTGGTACCAGATGCTGACTTTGATGTGGTAATTTTTTTTTTTTTTTNGAGATGGAGTCTTACTCTGTCGCCCAGGTTGAAGTGCAGTGGTGTGATCTCAGCTCACTGAAACTTCCACCCTCCAAGTTCAAACAATTGTCAAGCCTCA

>16312083

CAGGAGGGGAGGTGAAGGCTGGAGTGAGCTGAGATCATACCACTGCACTCCAGCCTAGGTGATAGAATGAGATTCTGTCTCAAAGGAAAAAAAAAAAAAANGAATAACACTAAGGTATGTGACTAAATGTTCACATTTATTATCAAGGGGAGGAAAAAGTCATTGGAAACCTTATGTGCATGCAATTTCACACATATACAC

>16316949

AAACTTAGGAGGTGGAAGTTGTAGTGAACTGAGATTATGCCGCTGCGCTCCAGCCTACGAGACAGAGCAAGACTCCATCTCAAAAACAAAACAAAAAAAANTAAAAATAAAAACACAAATAAATTAGAAACATTTGCTACATCCTAAGGACAGAAAGAGTATTTTTCCCCCCATCGGATTTTACCTTCTATTTTCTTTTTT

>16322756

TCAATATTGTGAAAATGACCATACTGCCCAAGGTAATTTATAGATTGAAAACCATCCCCATCAAGCTACAATGACTTTCTTCACAGAATTGGAAAAAAAANCAGTTTAAATTTCATGTGGAACCAAAAAAGAGCCCACACTGCCAAGACAATCCTAAGCAAAAAGAATAAAGCTGGAGGCATCACTCTATCTGACTTCAAA

>16342284

CATTGAGCTATCATTGCACCACTGCACTCCAGTCTGGGTGAAAGTGAGACCTTGTCTCAAAAAAAGAAAAAGAGAAGGAAGGAAGGAAGGAAGGAAGGAANAAAGGAAGGAAGGAAGGAAAGGAAAAAAGAAAGAGAGAGAAAGAAAGAAGGAAAGAAAGAAGAAAGAGAAAGAAAGAGAGAGAGAAAGAAAGAAAGAAAG

>16344757

TCCCTCTTTCTTCCTCTTCCTCCTTTCTCCTCCTCCTACTTGTTCTTCTTCTTCCTCTTCTTCCTTGTCATCCTCATCCTCCTCTTTCTCCTCCTCCTCCNTCTCCTCCTCATCCTCCTTCTTCTTCTCCTCCTCCTCTTTCTTCTTCTCCTTCTTCTTCCTCTTCTTTTCTCCTCCTTCTCCTTCTTCTTCCTCCTCCTC

>16345115

CCTCATCCTCCTCTTTCTCCTCCTCCTCCTTTTTCTCCTCCTCCCAGTTCCCCTCCAACTCTTCCTCCTCCTCCTCCCTTGTTGTTGTTGTTGTTGTTGTNATTGTTCTTCTTCTTCCTCCTCTTCTTCTTCTTCTTCTTCTTCTTCTTCTTCTTCTTCTTCTTCTTCTTCTTCTTTTCCTCCTCCTCCTACTCCTCCTCC

>16351289

TTCCCTTGGGTGTCTACACCACTAGAGCCCTCGGTTTCAAGCACAAAACTGGGCAGCTGTTTGGGTAGACAATAAGCTGCTAGAGTTTTTTTTTTTTTTTNCCATACCCCAGTAGTGCCTGGAACCCCAGTGAGAAAGAACCGTTGGCTCCACTCAAAAGCAGACTGAAGGCAGGGAGACAACTGGCCTTTCTCAGTAGGT

>16370665

ATAAAATGTCTGTGTTCAAATTCCAACTATGAATCTTCCAGTGGGATATCGCTGGACAATACTTTGGTAGTGCAGTTATTCTACAAAAAAAAAAAAAAAANGCATTTTCCTTAAAGAAGAGTTGAAATGGTGCTCTGGTTTGATGACATGGGAGTCTGTAGAATTCTTTTTTTGTTTGTTTTGTTATAAGACAGAATCTCA

>16371133

CTGGGAGTCTTCAGAATTCTAATGAGTGATATGAAATGATACTAAAAAATATATGTAATCCAAATCATCACCATGCCTAAGGCTAATTTTTTTTTTTTTTNGGTTTTGTTTTAGCAGCACATGAAGTTCTTCATGGCTTCAGTAGAAACCAGATATCTTCAATCTTGTCACTTTTGGCATTTGGGGCTGAATAGTTTTGTT

>16371768

ATGCTGTTTATCCTCTCAGAGTGACTTACATTAAATTTGAGCAATGAAAATGTTATTTTTAGAAAAGGACTTTGGTGGAATTTTGAAAAAATATATACAGNAGTAGTTAAAGTGCATTTGGCTTCATTGGTGTGTTAGAAATGAAATGTTGAGGATATATGTTAGGTACAGACATTTTAGTACTACAATTCTTCAAGATTT

>16385705

GACTGTGTGTGTGTGTACGTGTGTGGGCATATATTATATATATATATGTATATATTTGTGTGTGTGTATATATACATAGAAGTGTGTGTATATATAAAAANTAGTGTGTGTGTGTATATAAATCTTCTCCAATAGATAGTATGTTGAGTATGTGCTGCGATAGTGTTTGAATTACTCCAGCAATTCAAGTCACATAATGGG

>16411225

AGCAAACTAACACAAGAACTGAAAACCAAACACCACATGTTCTCACTCAGTGTTGATTTTTATATGTAAAAACCCCTAAAGATTCCACTTAAAAAAAAAANCCTGTTATAATTAACAAACGAAGTTGCAGGTCACAAAATCAACACACAAAAATTGGTTTTGTATCTGTACATTAACAATGATCTATCAAAAAAGGAATTT

>16412262

AAATATTTGCAAATCATGTATCTGATAGAGCGTTAATATATAGAATACATAAAGAATTCCTACAACCCAATAACAACAACAAAATAAAACAAAATAACTGNTTAATAAATGGGCAGAATATCTGAATAGACAATTCTCCAAAACAAACCCATATAAATATGGCCAAAAAGCATATGAAAAACTGCTTAACATCACTAATCA

>16420612

TTGCTAAACTATTCATTTTAATCTATCAATATTTCATTATTTGCAAATGAAATTATGAGTTTCTGGATACCAAAGTCTTTCATTATTTGTTGGACACCAANAACTCAGTACATAGCATTTATTGGCTGACCTTTGAAATAAGGTGTCCTTTGAAGTAAAACAAAACAAAAAAATCTCCAAGTTAATATGAGTACTTTTTAA

>16450751

TGCAAAGGCTGATAAAAGATAATATATGAAAAACAAACTTGGGTAATGAAGAAAATGCAATTATGTGTCAATATTTACCTTGTCCTTTTTAGAGAAAAAANGCACAAAATTATGTTTTTTTATATATGATAAAAGCAAACAAGTGGACAAACAGATTGTCTCCTAGAGCCAGTTTTTTAGGGGGATTTGTCTCATAAAAAG

>16516216

CACTGCTTTGGGAGGCTGTCTCAGGGAGGATTTCTTGAGCCCAGGAGTTTGAGACCAACCTGAGAAACATAGAGAGATCCCAGCTCTGGAAAAAAAAAAANTAGCTGGGCATGGTGGTGGTGCACTTAAAGTCTCATCTACCTCGGGGGCTGACTTGAGCCCAGGAAGTCAAGGCTGCAGTGAGCTATGATCATGCCACTG

>16516558

GCTATAATTGTGCCACTGCACCCCAGCCTGGGTGACAGAGTAAGACCTTATCTCTAAAAATATAAGCTAAAATAGGATGCTTTTTCTTTAACTTTTTTTTNGTCTGTAACTGGACATCTCTTATAAGTGAATGATGAACTGTATGATCAAAGCCTACAGAAAAAGCAAGATTCCTCTCATGGGGGGAGTTTCCATTAACAG

>16541418

AAGAACCCACCAATTCCGGACACAGCAGTTTCTCAGACTTTCCTTGTTTTAGACGATGTTTATGGCTTTGAAGAGTAAAGCCTAAGGTGTTTTTTTTTTTNGTAGAATGACAGTTAATTGCAATTTTTCTGATGGATTTCTCATGTTTAGTCTAGGGTTATAGGTTTTTGAAAGAAAGACTGAGGTAAAGTACCGTATTAA

>16575111

GATAGATTGGAGAAAGAAAATGTAGCACATATACACGATGGAATACTATGCAGCCATAAAATGAGATTCTTTGCAGGGACATGGATGAAGCTGCAAACTANCATTCTCAGCAAACTAACACAGGAACAGAAAACCAGACACCACATGTTCTTGCTCATAAGTGGGAATTGAACAATGAAAACACATGGACACAGGGAGGGG

>16583402

GTGAACCCGGGAGGCGGAGCTTGCAGTGAGCAGAGATCGCGCCACTGCACTCCAGCCTGGGCGACAGAGCGAGACTCCATCTCAAAAAAAGAAAAAAAAANGAAGAAAAAATTAGGACACAGGCACACACAGAGGGATGACTATGTGAGGACACAGGGAAAAGGTGCTGTTTACAAGTCAAGGAGAGAGGCCGCAGCAGGA

>16586268

AGACTTCTGAAGTTGGGAAATTACCGTTAACAATCTCCAGAAGAAAATTATGCTCCTCAGATAGGAATTAAAATGTGCCCTCTCAGTGGGGTTTCTTTTTNATAAACCCAATGTATCATTTGTTTAAATATTTTCTTATTGATTTATTTTTTAGTAATTTTCTTTTTTAAATAATTTCAAATTTTATTTTAGAATCAGGGG

>16590890

CCGGGAAGCGGGGCTTGCAGTGAGCCGAGATTGCGCCACTGCAGTCCGCAGTCCGACCTGGGCGACAGAGCGAGACTCCGCCTCAAAAAAAAAAAAAAAANTGTGAATGAATAATAAAGTGTTAATAATGTTTATAAGAACTATGAGGCATATTGGAATAGTTCTTTTTTTTTTTGAAATTGCAATGTTGAATGTTAGATA

>16607495

GCTCTCTGAAGTGTCAGAATCACTCTCCCCAAGCTCTGGGGAACTAGCCAGGTGGGGATGGCCAGAGGAAATTCAAACTCAGGACGTGTGTGTCTGTGTGNGTGTGTGTTTCAGAGGCTTCACCTATGTATAAAAATAAATGTGCCAGGTGTGGTGGCTCATGATTGTAATCTCATCACTTTGGGAGGCTGAGGTGAGAGG

>16608059

ACTGCAACCTCCGCTTCCTGGGTTCAGGCGATTCCCCTGCCTCAGCCTCCTGAGTAGTCAGAATTACAGGAGCCTGCCAGCACACCAGGCTATTTTTTTTNCTCTATTTTTGGTGGAGATGGGGATTCACTGTGTTGGCCAGGCTGGTGTCGAATTGCTAACCTCATGATCCACCCACCTTGGCCTCCCAAAGTGCTGAGA

>16626098

AGGAAGCTGAGGCAGAAGGATCACTTGAACCCAGGAATTTGAGGTTGCAGTGAGCTATAATAATGCCTCAACAGAGCAGACTGTCTCTAAAAAAAAAAAANGAAAAGAAATGAAAACAAAACAAAACAAAACAAAATATGATGAAGATCCAGAAGGATGTGCAGCCCATCTCTTTGCCATTCATTACACTTCTGTCTTCAT

>16631764

TGATATCGAACTCCTGGGCTCTAGTGTTCCCCCTGCCTCAGCCTCCCAAAGTGCAGAGATTCCAGGCATGATCCACTGCTCCTGGCCTTTTTTTTTTTTTNAAGAAATTAATTAATTAATTTTAAAAAGTCTTAGTGAAGTAATTCAGACAGAAGTGACTTGTCTGCTCTCTCCCAGGTCACATGTCTCAGGGAAGAGATC

>16632737

TTGTCTACTATAATGTATGCTTTCTCAAAAATAAATGGATAAGTCTCACTCACAGTTACATGTCTGTGCTTAGGACTGTGTCAGTGCTAAAAAAAAAAAANCCTGAACTTATGAATAAGTCAATGAATTAATACATTCTTGGCAAAGTCCATGACTTTGTGGCCTATTATAAATTAGTGTGTTCAAGTTGAGGTTCTGGTT

>16661664

ACTAATTTACTGATTCCTCTCTCATCAGGGACAGTTCCTTTCCAAAATCCTACAACGTGGGTCCATGAAATCAGCTAGAGAAAAAGAGGGACAGGATGGANGCTAGGATTATCATGGGCACTGACATACTGGCCTCTGGGGGTAGGAAGACTAATACTCCCTAGGAAGGAAGGAAAAGAACCTTGGAGAGGACTGTTTTAT

>16677739

GCAGCCAGAGAGAAAGGTCGGGTTACTTATAAAGGGAAGCCCATCAGACTAACAGCAGATCTCTCTGCAGAAACCCTACAAGCCAGAAGAGAGTGGGGGGNTAAATATTCAACATTCTTAAAGGAAAGAATTTTCAACCCAGAATTTCATATCCAGCCAAATTAATCTTCTTAAGCAAAGGAGAAATAAAATCCTTTACAG

>16709790

CACAGGGTGCTGATTGGTGTATTTACAATCCCTGAGCTAGATATAAAGACTCTCCACGTCCTCACCGGAGCAGCTAGATACAGAGTTTCGATTGGTGCACNCAAATCTTGAGCTAAACACAGGGTGCTGACTGGTGTATTTACAATCCCTGAGCTAGATATAAAGACTCTCCACGTCCTCACAAGAGCAGCTAGATACAGT

>16727970

TTCTATTGATTGGAATAGTTTCAGAAGGAATTGTACCAGCTTCTCTTTGTACCTCTGGTAGAATTCAGCTGTGAATCTGTCTGGTCCTGGACTTTTTTTGNTTGGTAGGCTATTAATTGTTGCCTCAATTTCAGAGCCTGTTATTGGTCTATTCAGATTCCATTTCTTCCTGGTTTAGTCTTGGGAGGGTGTATGTGTCCA

>16738915

CCAGCACTTTGGGAAGCGAGGTGGGCGGATCACGAGGTCAGGAGAGGAGACCATCCTGGCCAACACATTGAAACCCCGTTTCTACTAAAAATACAAAAAANTTAGCCGGGTATGGTGGCACGCGCCTGTAGTCCCAGCTACTCGGGAGGCTGAGGCAGGAGAATGGTGTTAACCTAGGAGGCTGAGTTTGCAGTAAGCCGA

>16753201

AAGATTGTTCATGGGACATTAAATAGTTGACATAATTTGTATTTGCTGCTTTCACGTAAATATTGGTATTTTAAAATAAAAACTGTTATATCAAAAAAAANGAAGAAGATATGCAACGACAAAGACAAAAACAAGGAGAACACCATGTGAGGATGGAAGTAAAGATTGAAGTGATTCATCCCTAAACTAGGGAGCACTGTT

>16766506

GACTTCCAGTGTATAATTTTAAAAGTTTCTCTTACTGACCTCATTATTATACTCCTTTTTTGCTGACCTCATTATTATACTCTTTTTTTATGATTTTTTTNCCTCCTTATAGTTTGGATTCATCAAATTTCCTGTTTTATGTTGCACTTATATTCTAATGAAGATACATCGATTCTTCTTATTGGCTATCAAACTTTTCAG

>16769601

AAGTTACTCCTCTTGCACACACACTTTCCATATTGTACTCTGTGAAAAGATGTCACTTTGTGCAGCCCACGCTTAAGAAATGGGGACCTGCTATTCCCCCNGGAGGGCAGAGTATCTACAGAAATTACTTGAAATTATTTTACATAAGAGATGTCTCTATTCTGAGCCACTCATTTACTCCCTCATTTACATATATCAGTA

>16774113

CCTCAGAACACTGAATCCTGCTAATTGAGTGATTTTCTGATTGTCATGTACTCACACAATTGACTAAATGTCTTACTATGCTTTCTTGATAAGTAGTGTCNACATGTGAAGAACCTATCTATTTAATCTATCTACCTGCCTATATATCTCTATTTCTCCATCTAGTCTATCAATCTATCTTATCTATATAATCTCTATGTA

>16783795

CAGCCTGGGTAACAACAGTGAAACTCCATCTCAAAAAAAAATAAAAATAAAAATAAAATAAAAATTAAACACTTTGTTGTGTGGAAAAAAGACATATAGTNAAACAAATATAACCAGCCCCTTATTTCTGAGGAGAAAGACTGATGCATTGTAGAAAGGATAATACAATTTTGAGATTTAGGTAAGGACTATCAGAATTTC

>16786135

TGCACATGTACCCTAAAACTTAAACTATAATAAAAAAAAATGGCATAAACCTTTAAAGCCACAAAATAAAATAAAATAAAATAAAATAATAAATTCCCTCNAAAAAAAAAAAAGAAAAGTTTATTTCTTCCTCAAACCTTCTTTACCTAGCCTCACTCAAACCAACTCTTAATTTTTCCTTTTTTTTTTTTTTTTTTTTTT

>16810272

GACTAATAACCATTTTTCATGAACCAACTCTGTCTCTTACATATTTGTTTAGGTTGGGTTAAAGTTTATTTCAATTGAACGTGTACATAGAGTTGTTGTANTTAGGAGACTTTCTGAAATAATTCTCAGGCAATCCCTTGAGGTAGAAAAACATCTCCTTGCTTTACTGTAAATCCATTTCCATGCTTTTTTCTATTCATA

>16823969

ACTTGGACCCAGGAAGTGGAGCTTGCAGTGAGCCGAAATCACTCACTGCACTCTAGCCTGGGTGACAAGAGCCGAACTCCATCTAAAAAAAAAAAAAAAANGCCTGCCATCTTATACGTATTTCTATTGGTCCTGTACCAATGTTCTTATTTCAGAACATGAAAAAAGAAAAGAAGCCATAAGTTATCTAAGGCAATTCTT

>16832308

ATAAAGGTGGAAGGTCTGAGCAGTCATGCAGAAAACATAGACACTATTTTTATCCCCTTTGTGTAGAAGAAATTTGTTTTTGTTTTTGTTCTTGTTTTTTNAAAAGAGGAGAAACAACAAGAAAGTACTCAAGCCATTCCTCATTGGTAAGGCTCTATATGATTAGCTAACTGCACATTTTTTCCCATCTGGGTAGCAAAA

>16845415

TTTTCTATTTGTTTTAGGTATGCAAGAGGCACGTTTGTGTGGGAGCTCAAAAATGTTTAATTATTTTAAATCTCCTTTCACTAATTTAATAAATTTTTTTNGAGTTCAGATGCAATCTATTACACATGTTTCTTGATTTTAGGGCGATTCTACCCCAACATGCAAAATAAACAAGAGATCCTTCTAGTTCTTTACAAGTTT

>16871174

ACAGTTAATCATCACCTGACACCATAGCTCATGCAAATCGTGTTTTATTTAGGATTTATGTTACTGCTAGCATTTTGGATGAAAAGATACTGTTTTTTTTNGTTTTGTTTTGTTTTTTTGTTTTTGAGACAGAGTCTAGCTCTGTCGCCCAGGCTGGAGTGCAGTGGCGAGATCTCAGCTCACTGCCAGCTCCTCCTCCCA

>16875652

TCAATTATCTATGGTCATCCATGGTCAGCAGAAAATTCCAGAAATAAACAGTGCATCAGTTTTACATTGCCCTTGGTTCTGAATAGCATGATGAAATCCCNAGCAGTCCTGCTCCCTCCCAATCCATCCTGTCCAGCCAGTGAATCCTCCCTTTGTTTGGCATCTCCATGCTGGTAAGGCTGCCTGATCTTTAGTCATTTA

>16900855

CAATGGCCTTCCATCTTTACTCACCCAGGGAGCTCCTCCAGGGAAAGCTCATCTAAGTAAGATCTCACCATCATTTTCATGCCCTTTCTTTTTTTTTTTTNCTTTGTTGTTTTGAGACAGAGCCTTGTTGTCTCTCCCAGACTGGAGTGAAGTGACATGATCTCGGCCCAGTGCTACCTCCACCTCCCAGGTTCAAGCAGT

>16918728

TTGACAATTATAGTAACAAACTTTAGTACAGTAAGAGATATAATAGGACACTGTAACTGCTCTCAGATCAAACATCCCTCCTGCTTAGAGAAAAAAAAAANTTGCACTTAGTGCAAATAGAATTGCACCAATTTCTCTGATACAGCCTGAAAATTAAGCCAACATTTCAGGTCTTGTAAGAAAAGTTGCTGTCTTCTGGCT

>16922421

ATCACTTGAATTTGGGACATAGAGGTTACAGTGGGCCGAAATCATGGCACTGCACTCCATCCTGGGCAACAGAGTGAGAGAGTCTATCTAAAAAAAAAAANGACTCAAAGTTGACTCAAAGAGAATTGTTTCCAGGCAGGCCATTCTCAAATTTTCATTTCCATGAAACTCATATATCAATTATCTTCAAGTTTTGATATA

>16935377

CAAGAAACCTTCCCCAAATACTCAACTATAATATTTGTTCCTTACATACAATTTCTTTTTTTGAAGATCTACGTCATTAACTCATTTGAAGGGACATTTANTACGTAATTTATCATAGGAGTCTGTTGTGTTTAAAGAAAAATGTGCACACAAATGGTACCTTGAACCTCGTAAAATTTACAATGACTTCTGGGATTGCTT

>16937172

TGACTCTGTCTCCCTCCCTCTCTCTCTTCCCCTTTCACTCTCCTCTTTCCCTCTCTCTTCCTGTCTCTCCCTCTCTATGTCCTCTCACTTTCTCTCTGTCNCTCTCTCTGTTTTCCTCTGTCTCTCGCCCTTCCTCTCTCCCCTCCTTCCACTGTCTCTCCTCGATCTCCCTCTCCCTCACACTATCCTCTCACCTCTTTC

>16959466

GCAGCCAGATATAAGGGCTGTTTTTTGTTGTTTCTCAGAACTTCCAGGAAATATATGCATATGTCACATCTCCTAGGCCACCTGGTTCAAAAAAAAAAAANGTTATGCTAAGGAAGTAAAAGTGATACTTTCTCTGCAAAATCTTATTAATATATTGAAAGAAATTGAGATATAAAAAAGGTCCACTGTACCTCTACCTTT

>16962184

GAGACATGTAAATTAAATCTCACAGTTACCTCTGTCCTCTGCAGTTTTGACCCCTTGGAATTTCACGAAAAGTAATTTAATTGAACAAGCATTCACATTGNTGCCAGAACTTATAGAGCCTATGGATTATCATCTTGGTTTCTAGTCCAAGATGCTATACAAAGCCTTTTATTTAATTATCTCATTTACCATGACATATTT

>16964275

AACCTGGAAGGCAGAGGTTGCAGTGAGCTGAGATCACACCACTTCACTCCAGCTTGGGGAACGGAGCAAGACTGCCATCTCAGGGGAAAAAAAAAAAAAANCAAAAAAGCCTGAGATGTTAGTTGCGTGTGGGGATGTGGGGTGCACCTGTTACACTTCATTACTAATCAAAATCTGCATTTTTAGTGATTAGTCCCCAAG

>16965899

AAGTTACTATCAAGGCCATATTGTGATGTGGATAGACAAAAATATTTCCATGAATTTTGTGAATTGTATTTTTTACTAGTTTGGTATGTAGAGAAAGATANCCTTCCATCTTTATTCTTTCTTTCTCCCTTCACACTTACTTCTTTACTATTTGTTCCTCTTCCTCATAAACATCCTAACAATCTCCCTGTGAAGATGAAG

>16969411

TTCAGCTCTTTATATTGCATGGGAGACCTCGAATTGGAACATGTTTGGGTTTTTTGCTTGTTTGTTTTTCTTTTTTTCTTCTTCTTTTTCTTTTTTTTTTNCAAAGAATGTGTTTTATTTTATTTTTAAAATTTCAATAGATTCAAAGAAAGAAAACAATTTGTGTTTTCTTTCAAGATTTGTGTCCCTGTCCAAATCTTG

>16972369

GTATCATAATGACAGGATCAAAATCACACATAACAATATGAACCTTAAATGTAAACAGGCTAAATGCCCCAGTTAGAAGACACAGGATGACAAATTCAAANGTGTCAAGACCATCAGTGTGCTGTATTTAGGAGACCCATCTCATGAGTAAAGACACATAAAAAGGCTAAAAATAAAGGGATGGAGGAATATTTACCAAGC

>16979013

ATGGACACAGGAAGGGGAACATCACACACCGCGTCCTGGAGACAAATAACAAGTTCTGAAATTGAGGCAGTAATTAATAGCCTACAGAAAAAAAAAAAAANTCTAGGACTGGATGGATTCACTTTAGAATTCTACCAGAGGTACAAATAGTAGTTGGTACCATTCTTTCTGAAACTATTCCAAACAATAGAAAAAGAGGGA

>16980935

CTGGCCTTCCAAGAAGGTTTGTGTCTTTCCCTATTAACGTTTATAAATTTTCCAACCACTCTGATCAATCTACATCTCCCCTTTTTTTGTGTTTTTTTTTNGCATCAGATTTTGTTGTTTGGAGAGTACAGATGTGTGCAGCAACAGGTTTGTCAGGTGCAGCAGTTATAATTCATATTCTGGCTTTGAATCCTGGAATTA

>16996653

AAAATTCTCCTTTTTTTTGTGGTGTCTCTGCCAGTATTTGGTATGAGAATGATGCTGGCCTCATGAAATGAGTTAGGGAGTATTCCCTCTTTTTCTTTTTNCTTTTTTTTTTTTTTTGAGATGGAGTCTTGCTCTGTCGCCCAGGCTGGAGTGCAGTGGCGGGATCTCGGCTCACTGCAAGCTCCGCCTCCTGGGTTCACG

>17028399

TAAAAGTATGTGATTCTATCTGTACCCTCAGATAGAAGCTTAAATATAAAATTTGTGAAATTGTATAAATCTCCCTTAAATGGCACTGTATTTATCAATTNAGATTGTTTTTAAAAATGGCCTCTTCAATTAAGGATTTTTTAGGCAGATAATGACCTTCCTATTGCTATTTAGTGGAATTGTAGACTATGACTCAACTAT

>17030339

TTGGCATGGCCAATATATTGCTAATTACAGAGATATGTGGATAGGATTTTGTCTTTAAAAATCTATAAGGTATATTAATATTCTGTGAATGATATTTTAANACATTACTAAACATAAATGGATTATTAAGTTATATATTGATATAATGCGGTTGGGAAATTTTATTAGATCAATATATGTTCAAAATACATATGAGTAAAG

>17037434

CGCCATTCTCCTGCCTCAGCCTCCCAAGTAGCTGGGACTACAGGTGCATGCCACCACACCTGGATATTTTTTTCTTTTTTCTTAGTAGAGATGGGGTTTCNCCATGTTAGCCATTATGGTCTCGATCTCCTGACCCCGTGATCCACCCACCTCAGCCTCCCAACACATAGATTTTTCACCTAAAACATAACCTGCTAAAAT

>17047896

CTGCAGAGACATTTACTTTCCCCTGCAAATAAAAATCTTCCTGCATCTCTCTATATTGGCTTAGAAATGCAGATCATTATCACCATTTTTTTTTTTTTTTNGAGATGGAGTCTTGCTCTGTCACCCAGGCTGGGGTGCAGTGGTATGCTCTTGGCTCACTGCAACCTCTGCCTGCCACGTTCAAGCAATTCTGCTGCCTCA

>17048791

GAAAGAGCTATTGAATAAGCTAACACATGTCCTATTTTATTCTTTACACTTCCAATTTAATATAGAGGTATAAAATACTGTTTCTAAGCAGTTTTTTTTTNCTTGTGACATGTTAGGCTATTTCAGAGGTGTTTGCATACCCTGGATAAAGTGTCCATTCATTTGTTCTGCATTTAAAAAAAAAAAAAACTCTGCTCTTCC

>17071110

TTAAAGTATAATAATAGTAAAATTTAAAACAAACCCTGTAAAGAAATAAGGACAGAGAAGAAACAAAAATGGAAGGAGGAAGAGAGGAAAGAAAGAAAGANGGAAGGAAGGAAGGATGGAAGGAACGAAGGAAGGAAGGAAGGAAGAAAGAAAGAGAAAGAAAAGGAAGGAAAGAAAGAACGAAAGAAAGAAAGAAAGAAA

>17071465

AGGAAAGAAGGAAGGAAAGGAAATAAGGAAGGAAGGAGAAAGAGACAGAAAGAGAAAGGAGGGAAAGGAAGAAGAAAGAGAAAGAAAGAAAGAAAGAAAGNGAAAGAAAGAAAGAAAAAAAAAGAGAAAGAGAGAGCAGAAAGAAAGAAAAGCAGAAAGAAAGAGAAAAAGAGAAGAAATAAATCTCAAAAGGAGAAAACC

>17092809

GATAAGACTCTCACACAGGTCAATCTTAGCAGACGTGGGGCTTAATATATACTTCTGAAGCTGGGAGATAGAATCCCCAAGTTCATCATTTTTTTTTTTTNGGCATTTTGTCCACTGAACTTAGGAGCAACCAATCAGCTTCGTTGTGTTCCTTGGTTCTCCACATGTGGTAAAAAGTATTATGTATAGAGTCACTAAACT

>17093858

ACACTCAAGATCAGTACTTGTTTCCTTCCACCCAATCAAGTTGACAATCAGCATAACCATCACATCCACTTTTTAGCTATTGCAAAACATACAAAAAAAANTACTAACTATAATCATTCTATTGTGCTTCCCAATACTAGATACTATTCATTCCACCTAAACGTATTTTTTGTACTTATTAACCATCCCCACTTTATGCCC

>17097248

AACCCTAAAAAGAAGCAGCTTATTTTTTTCTGCACTATGGCCTGGCCTCAATATTCTCTCTCTGATGGGGAAAAATGGGCCACTTGAGGGAAGTAAAAATNACAATACTATCCTGTAGCTTGACTTTTTCTGTAAGAGGGAAGGCAAATGGAGTGAAAAACTTATGTCCAAGCTTTCTTTTCTTTGAAGGATAATCCATAA

>17108454

GGAGAATGTATATAGCTTTCATCAGCTTTTCAATGGAGAACTAATTAAATCCCACCACACAAGATTTTTTTTCTTGTATTCGTGTTTGTATGTGTGTGTGNCACATGTATTAATTTTTAATTGTGATAAAATACACATCTATACTTTACCATTTTAATCATTTTTAAGTATACATTCAATGATATAAAGAGCATTCACATT

>17110489

TTCACCACATTGGCCAGGCTGGTCTCAAACTGCTGACCTAAGGTGATCAGCCCTCCTTGGCCTCCCAAAGTGCTTCATTTATTTTTATTTTTTATTTTTTNAGGGGGGTCAGGTTTTGGTATTAAGCTTATGCTGATCCCAGGAATATCTTGGAGTAGATTCAGTTGTCTTGAACTTCTGGTCAAATTTATTACTACTATA

>17115392

ATCAGACCCCTACCACTTTCCTGAATGTTTTGTCAATAATGAAGAAATGCTATTTCTATTAATGTCATTGACATAAATTGAGCCACTTAAAACAAAAAAANGTGATAGAAGTACCTATCTTTTATTCTTTGTATCCAATCCCTATGTAATCATTTCTTATATTTCACATTCAACTGAAGTCCATGTGAATTTCATAAAATA

>17125169

TGGTGATATCCGCTTTATCATTTTTTATTGTGTCTATTTGATTCTTCTCTCTTTTCTTCTTTATTAACCTTGCTAGCAGTCTGTCAATTTAAAAAAAAAANCCAGTTCCTTGATTCATTGATTTTTTGAAGGGTTTTTTGTGTCTTTATCTCTTCAGTTCTGCTCTGATCTTAGTTATGTCTTGCCTTCTGCTAGCTTTTG

>17141973

AAATCTGAAAAAAAAAAAATCCAAAAAAACTTCTGGTTCCAAGCATTTTGCGTAAGGGATATTCAATCTCTGTGTGTGTGTGTGTGTTTGTGTGTGTGTGNGTCTGTGTATGTGTGTGTATATATATTACATGTCAGCTGTCCCCAACTGTTTTGGCACAAGGGACCAGTTTCATGAAAGACGATTTTTCCACAGTCTAGG

>17147492

CCCTTTCTTTCTTTCTTTTTCTCTTTCTTTCTTTTTTCTTTCTTTCTTTCTTTTTCTTTCTTTCTTTTTCTTTCTTTTTTTCTTTCTTTCTCTTTCTTTCNCTTTCCTTCTTTTCTTTCTTTCTTTCTTTCTCTTTCTTTCTTTCTTTCCTTCTTTCTTTCTTTCTCTTTCTCTCTTTCTTTCTTTTTCTTTCTTTATATT

>17147506

CTTTTTCTCTTTCTTTCTTTTTTCTTTCTTTCTTTCTTTTTCTTTCTTTCTTTTTCTTTCTTTTTTTCTTTCTTTCTCTTTCTTTCTCTTTCCTTCTTTTNTTTCTTTCTTTCTTTCTCTTTCTTTCTTTCTTTCCTTCTTTCTTTCTTTCTCTTTCTCTCTTTCTTTCTTTTTCTTTCTTTATATTTTTCTCTCCCTTTC

>17175834

TGATGATGAACTTTTTTTCATGTTTGTTGGCTGTATAAATGTCTTCTTTTTAGAACTGTCTGTTCATATCTTTCACCCAATTTTTGATGAGATTTTTTTTNCTTGTAAATTTGTTCAAGTTCCCTGTAGGTTCTGGATATTTGCCTTTTGTCAGATAGATAGATTCCAAAGATTTTCTCCCATTCTTTAGGTTGCCTAATC

>17199332

GAAACAGCAACCTTTTAAGCAGTTAATGGTGGGTGTTACATGATGCAGGAAGTGTACTTACAGAAGTGAGAACAAAGGCAGTTAATCGTTTTTTTTTTTTNGACAGTGTTTGTATAGCTTTTAATGTAGGAAATTACTATTTTACTACAAGGCTTTTGTTTAGCTGTTATCAGAATGGAATGACAAAAAGTTGGGAGTGTA

>17209897

AACTTTTTGACCCCTTTACATAACATGTCTTAAAATGAAAACGCCAAGCATATTTTTGTTTTTATATTTTTATTCTACAAGCTTCTCTCTCTTTTTTTTTNCTTGGTTTGTTTTAGAGACAGGATCTCCCTATATTGCCTACACTCTAGTACAGTGGTGCAATCATGGCTTATTGCCGCCTTGAACTCCTGGGCACAAGCA

>17213253

GTTGTCCATGTTGGCACCAGAGTTGGAGTTTTAAGAGGCTTAGAAGCCTGACCATCAATAACCAAAACAGTTATGGAGGCAAGGGAAACAGGCCCTTGAANCGAAGGTAATGTGGAGTGGGTAGCCTCCATATTGATGAAGAAGGGGATGGACTTACCTTCCACTGTAAGAGTTACCTAAAGTGTCTGTAATTGTCCAGGC

>17250023

GATTATATATAAATATCATTAATCATTAGTTTGTAATAATTACCTTTATTCCAATATTATAATAATCCTCGCTCTATAATTATAACCTAAAAAAAAAAAANCAGGCCTACAGAGATAGGAGCTGAGGGTACATGGTGAGAAGTGACCAGAAGACAAGAGTGCAAGCCTTCTATTAGGCCTAGATAGGGCCACCAGAGTGCT

>17278250

GAATTATGCACGTAATTTTCTTTATAGGTTTTACATAATCGTCCCATTTTGAGCAAAAATGTGAACTGACCAGCAAAAATGTTAAACATCCAAAAAAAAANGAAAGGAAGAAAGGAAGAAGAACGAAAGAAAGAAAGAAAGAAAGAAAGAAAGAAAGAAAGAAAGAAAGAAAGAAAGAAAGAAAGAAAAAGAGAAAGAAAA

>17279837

TAACATAATATATTGTATTACATAAGTATCTGTAATATAATACACATAATAATATAACAATATTATATACTTACATATGATGATCATTATAGAAACAACANATATCTCTTGAACATTTATCTTATACTCGTCGTTTCAAAGTATGTTATATGAATTTGCACTTTTAATCTTCACTACAAATATATAAGGTGAAGGAAAGTA

>17281991

ATACATGACAGGTGGATGCATAAATGGTAGACATAGTAGAGATAGATATATGATAGATAGATAGATAGATAGATAGATAGATAGATAGATAGATGATAGANGATAGATAGATAGATAGATAGATAGATATAACAGATGAATGGATTAATAAATAAAGAGCATAGATGGATGCATAAATATGCAGACAGATGCCAGATAGGT

>17283126

TATGTATGATGACAGAAATTAAAACGAAACCCTTGTCAGAGTTTAAAATGCCATAGAATTAAACATAAATAAAATTTTCTTCTGGAGGTTTTTTTTTTTTNGTTCTTCACAAGGAGTAATGATACCTATCAGTAAGATGTTAAATTTCTCTAACATAATACACAATTTTATTTATAATTAAAAAATTATTGTTTGTTTATC

>17293928

ACAAAACTTTCATTCTTCATATGTACTTCAACAAGCCTCAACTTTTAGAACACCCTGCTGCTATGGAGACCGTGGTTTATTTATTAACATGGCTTTAATCNGCCCGGAAGGGTCAAAATAATAATAATCCTTAGCTTGATTTACATTGGAGCCTACATTAAGTTTCAAATGGTTTTATTTCAAGCTTTGTGAAGAGTGTTA

>17304745

TGAGAGAGACATAGATAAATGAGAGATGAGGTACATAGATTAGACAGATAGATAGATAGATAGATAGATAGATAGATAGATAGATAGATACACAGATATCNTATCTTATAAGATAGGATGGGGTGGATGTGTAGGTAGATAGATTAGATAGGTGCACACCTAGATAGATTGGATAGGTAGGTAGGCAGATAGGATAGATAG

>17312035

TCCCTAGATAACTCAAAAAGATTTGTAATATAAGAAGCTTCGTTGACTGGGTTCAGCAAAATATGTTGATGGAATATTTAGTTGAAAATTGGAAAAAAAANTCTGTTTCTGTTTTATTCCAAGATTAGCCTTATTTTATCTTGTAATTTAATCTTTTTCCCTTATATTTTATTTCCATTAAACTACACTGTCTAAGACAGC

>17323739

GGAAGGAAAGAAGGAAGGAAGAAGGAAGGAAGGGAAGAGGGAGGGAGGGAGGGAAGGAAGGAAGAAGGAAAGAAGGAAGGGAGGAGGGAGGGAGGGAGGGNAGGAAGGAAGGAATGGAGGGAGGGAGGGAGGAAAGAAGAAGGAAGGTAGGAAGGAAAGGAAGGAAGGAAGGGAAGGAGGGAGGGATGGAGGGAGGGGAAA

>17329870

AATATGTCTATGTACACAAATACACACATTTATACAGATAGACATACATAGACACACATGAATGTAGATAGATTTTATACACACACACACACACACACACNGAGGGATACATAGAGATAGATGATAGATGATTAGCTAGATAGGTAAAGATAGATATAGACATATGTAGAGATACGTAGGTATAGTTAAGTACGTAGGTAG

>17346495

GCCTCTGCCTCCTACACTGCTGGGACTACAGGTGTAAGCCACTGTGCCTGGCTTATTTGGTTGTTATTACTTTGGGATGAAATATATATAATTATATAATNGGGGGGATAATTAAGAAGATATGGCAAGAAAAACTGAGAAAAAAAAGGAAAAAATAAGATTTTAACAGCAGAGATAGTTATCCTAGACTATAGGAACAAT

>17357401

AATAAAGCTATCAGCAACAACAGCAACCCAAAAAGGACCTTTAGTGAGATGAACAAATGTACCTGTCACATTCATTAAAATGGTTTATACCATTTTTTTTNCTTTTTTTGAGACGGAGTCTGTCTCTGTCTCCAGGCTGGAGTACAGTGGTGTGAACTCAGCTAACTGCAACCTCGGACTTCCTCATTTAAGCAATTCTCC

>17359741

AGAAAATCATTCTTCATCATCTCAATACTAAAACCATACTCATCTTTCACCTCTAAGGTCCCCTGTCCAAGAAGCAAACAAACAACAACAACAAAAAAAANCAAAGAAAGCTGTAGTGAGCTATGATCAGACCACTGCACTCCAGCCAAGGTGACACAGTGGGACCCCATCTCAAAGTAACAAACAAACAAAAAAGACAAG

>17392640

TTTGTATATATTCAAACATATTACCAGACTAAAAGATCAATAGCATTTTCAGTGAGCAATTCAGGCCTGGGATAAGCAAAACAAGACTACATATTTTTTTNAAAAACTTCATGGGAAGAAAGAAATAAAAGTTGAATATACATTGGTAAAAAACAAAATCTTGACACTGCTGTATCAAAGTTCCAAATTGGTCTTTCACAC

>17412504

GACATGCTGGGAGAAGGAAGTACCCTGATTCCATGGAGAGAGGGCACTAAAGCTCTAAATTCACTCCTGGATCTTGCATATATGTACACCTTTTTTTTTTNCTTGTCTCTTTTATTATTATTTTTTTATACAGGGCCTCTCTCCACCATCCAGGCTGGAGTGCAGTGGCACAATGATGGCTCACTGCAGTCTTGAACCCCT

>17414446

TTATTATTATTATTATTATTATTATTGATAGAGAGTCTTTCCATGTTGCTCAGGCTAGTCTCAAACTCCTGAGCTGACATGATCCTTCCTCCTCAGCCTCNAAAAAACCTGGGGTAACAAGTGCGAGCCATTGTGCCTGACCCCTACTTTTTCTCCTTATTACTTTTGTTTTAATTTTTTTTTCAAGGACAGGGTCTCACT

>17414926

GCAGGAACCTGGGAGGTGGGGCTTGCAGTGAGCAGGGATTGAGCCACAGCACTCCAGCCTGGGTGACAGAGTAGGACTGTCTCAAAAAAAAAAAAAAAAANGATTGAGCCACTGTTCCCCCAAGCCCATGTTCTTAAAACTCTCATATTCTGCCTCCTAATGAAATGCTTACATGTTATCCACATTCAAGGAAGATATATT

>17426835

AATGAGATACCACCTCACGCCAGTTACAATGACGACCATTAAAAAGTCAAGAAACAACAGATGCTGGAGAGGATGTAGAGAAATAGGAATGCTTTTACACNGTTCATGGGAGTGTAAATTAGTTCAACCATTGTGGAAGACACTGTGGAGATTCCTCAAGGATCTAGAAACAGAAATATCATTTGACCCAGCAATTCCATT

>17442074

TTTTAAGGTTTTACTGAATCAATAGTGCTGTGAAAATCAAACTATAAAACCTATACTGATATAAACTGTTTACAACAAAATCCTCTAGAGTTACAAGATANTAATGAATGAACTGCACCTCTAAGTTGGTTCTCTCATTTGTAGAGAAAAGCCTTTGAAAAACTTCAGGATTTAACAACTTGGTTGAGGGGTGGCAGGAAA

>17451738

TTTCTATTCCTTGGAGTAGTTTCAGAAGAAATGGTACCAACTCTTCTTTGTAACTCTGGTAGGACTTGGCTTTGAATTTGTCCAGTCCTGGACTTTTTTGNTTGGTAGTGTATTAGTTACTGCCTCAATTTTAGAACTTGTTACTGGTATATTCAGGCATTCAACTTCTTCCTGGTTTAGTCTTCAGAGGGTGTATGTGTC

>17466786

TGAACCCTGGAGGCGGAGCTTGCAGTGAGCCGAGATTGAGCCACTGCACTCCAGCCTGGGCAATAGAGCGAGACTCTGCCCGGAAAAAAAAAAAAAAAAANTGTAGAAGGATATTGGGCCGGGCGTGGTGGCTCACGCCTGTAATCCCAGCACTTTGGGAGGCTGAGGTGGGCGGATCAGGAGGTCAGGAGAAGGAGACCA

>17470928

AGACAATAAGTTTCTGCTGCTTTAAGCCACGGAGTTTCTTAATTAACACAGCACTACCAGGAAGCTAATACAGTGCATTGACCCTGGAGGAAAAAACTTGNATAGACTGAGGTTCTATCTGTGAGATGACCTTAAACCACCTTAATTATCTTTCTCAAATTCTGGTACTTGACACACAAATTTGTGATACTTGATGGGGAG

>17474385

ACAAAGGATAACACCATTGGCAAATTCGCAGTTCAATGTGGGAGTCTACTATCAGTTTTAGAATTTGCTCTTTGCCCTCAAAATCAAGTAAATTTTTTTTNGTGTTATGTAACAGATGAGAAGCAGAGGACTTTTCACAGTTTTACATTGATATGAGAAACAAGTGGCACTGAACACTTCCAAAGGGTCATTGGCAACTCC

>17474944

CAACCTCTGCTTCCCAGTTTCAAGCAATTCTCCTGCCTCAATCTCCCAAGTAGCTGGGATTACAGGCACCTGCCACCACACCCAGCTAATTTTTTTTTTTNCTTTTTTTTTTTTTTTGAGACGGAGTCTCGCTCTGTCGCCCAGGCTGGAGTGCAGTGGCGGGATCTCGGCTCACTGCAAGCTCCGCCTCCCGGGTTCACG

>17482906

TACTGTATTTAGGAGACTCAAGTCACATGCAGAGAAACACATAGGATTCAAATAAAGGAATGGAGGGAGATCTACCAAGCAAATGGAAAGAAAAAAAAAANGCAGGGGTTGCAGTCTTCATCTCTGATAAAACAGACTTTAAACCAACAAAGATCAGTAGAGACAAAGAAGGGCATTAAATAATGGTAAAGGGATCAATTC

>17528889

AATCACACTATATGTAAATAGATTAGAAATTCCAATTAGAGTTTGCACCACTGCACTCTAGCCTTGGCGACAGAGCAAGACTCCATCTCAAAAAAAAAAANGAAAACAACAACAAAAAGAAACAAACAAACAAAAAACCCTCCAATTAAAAGGTAGAGATTGGAAAAATGGAAGTACCAAAAAAAAGGGACATGATCTAAC

>17528974

TCTCAAAAAAAAAAAAGAAAACAACAACAAAAAGAAACAAACAAACAAAAAACCCTCCAATTAAAAGGTAGAGATTGGAAAAATGGAAGTACCAAAAAAANGGGACATGATCTAACTATATGATATCCACAACAGAGATACAACTTAGAACAAATGGTGCAAAAGCTTGGAAGTAAAATGATGAAAAGATATTCCATGCAA

>17535741

AAAGCTAGAGCATCTGGGGACAGCAGGAATGGCCTGCCAACTTGGATGAACCTCATGTCCCCACTAACAAAATGAAAGTGGTTCATTGGAACTGAAAAAANGGAGAAAATGGGCCGATAGAGTGGCAAGTGCAGCAAGGCAGAGCTTGCTGTCAGGGTGGCAAGAGTAGCTTGCTACTCCAACTGGGAGTGTGTGGGTGCA

>17539321

CAAGAAGGGAAGTTTAGAGAAAAAAGAATAAAAAGAAATGAGCAAAGCTTCCAAGAAATATGGGACTATGTGAAAAGACTAATTCTACGTCTGATTGGTGNATCTGAAAGAGATGAGGAGAATGGAACCACGTTGGAAAACACTCTGCAGTCTATTATCCAGAACTTCCACAATCTAGCAAGTCAGGCCAACATTAAGATT

>17564902

GCATTTGAGAGCCAGAGTTATTAGTATTAACTAAATCATAACTGACTGTTTCCTTAGTCAAGAGAAATCAAATCCCACGGGTGTTTTTTTGTTTTTTTTTNCTTTTTAGGGAAAAAAAAAAAAAAAAGGACCTAACAGCATCACACATGTCAAAAGCATGGGAAGGTGCCCTGGTTTTCTTCCTGGTCGACATTAACTGTA

>17576259

TGAACCCAGGAGGTGGAGGTTGCAGTGAGCCGAGATTGTGCCATTGCACTCCAGCCTGGGCAAGAGAGTGAGACTCTGTCTCAAGAAAAAAAAAAAAAAANTACAAGGACGGTCCCCAAATGACAGATATGAGAGCACATTTGGTTTTTTAATGTTTCTAGACTTTATGAAAGTGACAAATGGCTTGGAAGAAAATAGTTG

>17596831

TTTTGGCCCCCAGGTCTGTTCAATATTGAAGTTCACGCCTTTCAAGTCTAAACCTATGTCTTGCTTTATTGCTTTGGCAATCTCTCTCTCTCTCTCTCTCNTTCTCTCTCTCTCTCCCCCTCCCTCCCTCCCTCTCTCTCTTTCTCTCTCTGTCTCTTCCTCTGGAATATCTAATAGCTAAGATTGGGCCCCTGGTTATGA

>17622755

ATTTTATTTAGATAAGGATGACCTATCTTTTAAATGGATCTCTGAGCTCTGGGCAGAGCCTCTCAAAAAGCCACAACTTTTGCACCCCCTACCCCCCCCCNAAAAAAAAAAACCACAAGGTCTTAGACGAGAAAAACAAACAAAAACAAAACATGAAGGTCTTTTAAATACAAACATGCAAACATACACACACACGCGTGC

>17644337

CAGACCTGAGCTCTTCCTATTCAGCCATCTTGGAAGCTGATATCAGTATCTTCTTGTTTTTTGTCTTGTTTTGTTTTGGTTTGGTTTGTTTTTGTTTTTTNGTTTTTGTTTTTGTTTTTTGAGATGGAGTCTTGCTGTGTCATCCAGGCTGGGATGCACTGGCATGATCTGGGCTCACTGTAAGTTCCGTCTCGTGGGTTC

>17648026

TTCTGCTCGTTCTTGAAAAACAGAGAATAAAAGCTACCAAGGAGATAATTAAGGAGAGTTAGGAATCAGAGAGTAGCTGCAACCAAAAAAAAAAAAAAAANTGGAGACTATCACATTTCCTGGCTTGGTTATCTTTACAGGAAGAATTCTGGAGCTCTGGGTTTGCTTTTTATGAAAACAGGAGATCCTGAAAAGGGAGGG

>17669731

GAATTTATTCAAACGCTTTTGAATTTAAGAATTTCCAGTTGCAACTGGTGCCTTGTTTAGATATTTTAACATATATATATATATATATATATATATATATNCACTTATGTATTTGTACACAGCTTTTTCTCAGTTCATCTGTCAAAGGTGGGAGGAAAATGATTTAAAATTCTTACTTCTAAAATTTACAGTCTTTCTCTA

>17674875

GAATGTTACAGACCAGGTCCAGTGGGCTCTCATTGCATGCCTTCTTATTCCAGTTACTGTGAGAGGAGAGACAAACCCCTGAGGAATTTGTTCTTTTTTTNACTTTCTGGGCTGTGAGATATTAATTTCCTTGCTTTATATTCTTGTAAAAGATGGGGAGTGGGACATAAATTGCCACAATGTACTGGAATAATAAAACAT

>17694623

ATAGACACTCTTCACTTTCATAATATCCTGGAATGGTTTTCCACCCAGTCGGGGGAAAGCAAGGTAAGGAAAAATTTCAGAGGCAAGAAAAAAAAAAAAANGAAAATGTTGTTATAATGGAAAATCCCATCAAAGCTTTTCAGCAAAAGCATCTAGACAGTACCCTCACATCCGTATCCATCTTTAAATGTGATACACAGA

>17709798

GGACATATTCTCATCCTAATCTGTAACTGTAGCAATTAAGAAAAAGCACATATATGTAAATCATTTCAAGGTTATCTTTTATGTCTCAAGTTTTTTTTTTNCTTTTCCTGTGAACACCTCAAATGCTGCATTGCCACAAGGTTTTAATAGTTCAGACATGTAGCCATTATTTCACTCATGTGCCTGTGAAGCTTAGTAACA

>17745209

GGGAGGATGACTTAAGCATAGGAGTTTGAGGCTTCAGTTACCTATGATCACACAACTACACTGTGTCTTGGGTGACAGAGAGAGACTCTGTCTCTAAAAANTAAAATAAAATATACAAAATAAAATATTTCACTGGCTAGAATGTAGTCACATGACCAAGCCATAGAGAAGTCTGGGAAATGTAGTCTTTAGCCGACTAGC

>17756595

AAACATCTTCTGAATTCCCAAGGGTCTGAGATTTAAACTTTACTATTTACTGCCCTGCACTACAGCAAGCTGCATGTTTCAGTGGTTTTCTTTTTTTTTTNCTTTTATTATTATACTTTATGTTTTAGGGTACATGTGCACATTGTGCAGGTTAGTTACATATGTATACATGTGCCACACTGGTGTGCTGCACCCACTAAC

>17784284

TCTCCTTCAGGTCTTCTCTGATTTAGTTATTTGTTGCCATGTGCTGGCTTTGAATTTGTTTGCTTCTGCTTCTCTGTTTCTTTCTTTCTTTTTTTTTTTTNATTATACTTTAAGTTTTAGGGTACATGAGCACAATCTGCCGGTTAGTTACATATGTATACATGTGCCATGCTGGTGTTCTGCAACCACTAACTTGTCATT

>17793138

GACTCATTTATTCCATTTTAGTCCATGACAAAACAGACAATGGCCTGACCCACCGTCTGCTTTATAAGGCTGATATCAAAATAATCCTTTTATTTTTTTTNCTTTTATTGAGACAGGGCTTTACTCTGTTTTCCAGGTTGGAGTGCAGTGGTGTGATGTTGTATCACTGAAGCCTCTACCTCCTGAGCGCAAGCAATCCTC

>17804895

AAGACAAAATATAAAGTCTATTTGAGATCATAGACTTTGAGGTCAAGTGTATTTTGATACCAATGAATATGCTTGAAATCTGAAGTGACTTAACTTGCAGNTTGTTTCAAGAGCTCTTGTATCATTATCAAATCGTAACCCAGAAATCTGTCTTTAACCGCACCCACCATCCTCACTAAAGTGACTGAGGTGTGTGTCTAC

>17825435

GCTTGAGTAGATTAACAAAGTGGTCTAGAAGCTCAAACTGGGTGAAGCCCACTGCAGCTCAAGGAGACCTTCCTGCCTCTCTGGACCCCTCCTCTGGGGGNCAAGGCATAGCCCAACAAAAGACAGCAGAATCCTCTGCAGACTTAAATGTCTCTGTCTGAGAGCTTTGAAGAGAGTAGTGATTCTCCTAGCATGCAGCTG

>17826130

AGAGAAGAAGGCTTCAGATGATCAAACTACTCCGAGCTAAAGGAGGAAGTGCAAACCCATGGCAAAGAAGTTAAAAACCTTGAAAAAAATTTAGACAAATNCTAACTAGAATAAACAATGCAGAGAAGTTCTTAAAGGACCTGATGGAGCTGAAAACCAAGGCATGTGAACTATGCAAAGAAAGCACAAGCCTCAGTAGCC

>17853177

AACTAATTTGTAGTCACTTTTCTTATATTTATAGTCATTTTATTTTGGGCCTTTTGTTGTTAGTGGAAGGTGTTTTTATTGCTACATTGGACAAGAAAAGNTGTCTACTAAGCTACCAACACCACAGGATTTCAAGGCCTCAATTTTGTACTCAACAAGCTGTATATTATATTTTGAGAAGTCACAAATGCAAGTTATTGA

>17865420

GAATGCAGGAGGCAGAGTTTGCAGTCAGCCAAGATTGTGACACTGCACTGCAGCCTGGGTGACAGAGGGAGACTCTGACTTGAAAAAGGAAAAAAAAAAANCGTGAAAAAAGAAACTATTTTATTTAGTACTTAAGCATCAGTATTTATAACTGATATTGATCTGGAATATTCTCTCATTATTCACCCACATACATTTTGA

>17867915

AATAGTCCCAACTTTTAACTCAGAGTCGTGTAATGTGAGGTGTTTGTGTGGTCATGTAATCAGTCCATGGGAACTCCAGGAACCACCTTTTTTTTTTTTTNCTTTTTTGACATGTAGGTCATCAAAACATGAATTAGAACACTTTTGGCTTCAAGAGGTAGACATCAATTTTTGCTATCTGAAGACCCAAGTGGAAACTTA

>17872656

CTAGTCCGTGCCTCCCGGAGTCAGAAAATGCCCATGAAGAATGATGACGTTATTAAGTAGGCAATACTAATAACTGCTACACTCTTTTTTTTTTTTTTTTNGACAAGTTCTCAGTCTGTCACCCAGGCTGGAGTGCAGTGGCATGATCATAGCTCACTGCAGCCTCCACCTCCTGGGCTCAGGTGATCCTCCCAACTCCAA

>17883025

GATAACTTTTGGGTGCCAGGAGTCTCTGCTGCTACTTCAGTGAGCACAACGATTCTGAACAGCAGGGTCCAAGGACCATTGCATGTTCTTGGACAGGGGGNAAAAAAACAGGCCAAAACCATAGGCAGTTTTTTATTTCAGATGGAAAATACTCAGGCATAAATAAGCTCACCCTTGAAATGCATCCTAAGCCACTGGGGC

>17893097

TCATAGGAGGCTGACATGGAAGGATCAAACAGAGAAATGAATACCCAGAAGTTTGAGACCAGGCTGGGCAACACAGTGAGACCTCAACTCATAAAAAAAANTAAATAAAAATTACATATACAAAGATATGAATAGGTGTTTGGCTATCAGAAGGCACCATTTGGGAGCCAGCTGTACCACTCCTTCATGGGTAACCTTGAT

>17904093

TATACCTGTACTTTAAAAAGCCTTTTAAATTCAATAAAGTTTATCGTTAGAGGTCTCTTTTTCTTCTTCTTGCTTTGTTTTTTTTTTTCTTTTTTTTTTTNCCCTCTGCATTCTTTGCTTTGTTCTTTGGATCAGAAATAATGCCATATTCTTAGAGCACATTTGCATAAACCTTATGTTCATACTCTTTGTATATAATCT

>17922711

CTTTTGTAAACTGCCATGGCTTGAGTATGTCTTCATCAGCAGTGTGAAAATGGACTAATACAACATTAATGTGAATGGATGTTACAATGACCCCCACCCCNTTGAATAGACCTTCTGTGAGGCTCAGGTATGTTTTCAGGTGAGTTAAAAATTCTGTAAGAAAAATATCATCTCACTGATTCCTTCATTTTGTTTAAAAGG

>17936299

CTGACTAGTAAAGTCAATTGGGATGAGAAGACTTTTGATCAGGTCTCCAAGACGAGGCACAAGTTCAGTAACTAGATTGCGGGAAACAAGGTTTCCAGGANAAGGTCATATTGAAGGTCAAAGATACAGGGCATTTTATAGCTTATTCTCCAAAGCTTAAGGTGTATTGTTCATCTGAAACTTAGAATAAATGATAGAAAG

>17942631

TCCACAGATGAAAACTTTTTATTTCAGATAGTGGAGTAGACTGTTTGATGACAAAGTCTTAGCGAGACACATATGGAGCCTGAAATTAAAAAAAAAAAAANTCAGTATGAATCCATTGAAACACTTCCAAAGTGGAAACTAATTTTGGAATTTAAAGGCTTAGAGAAAGAAAAAGAAGTTATTTTCCCAAGAGCAAAATAT

>17949908

TCCCAGCACTTTGAGAAGCCAAGGCAAGAAGATTGTCGAGGAGTCCAAGATCAGTCTTGGCAACATAGTGGAACTGCATCTCTGTAAATTTTTTTTTTTTNAAATGTCTAGGCATGGTGGCACATGCCTGTAGTCCCAGCTACTTAGACGACAAAGGTGAGAGAATTGCTTCAGCTCAGGAGACTGACGCTGCAGTGAGCT

>17952639

AGAGGAAGGAGTTGAGGTCAGGAGGACCCACGTTCTAACCGTACTCTGTCACTAGGAATGGCCAGGTCACTTCCAATACTTTTTCTTTTTTTTTTTTTTTNCTTTTTTTTGAAACAGAGTCTCACTCTGTTGCCCAGGGTGGAGTGCAGTGGTGCAATCTCACCTCACTGCAAGCTCCACCTCCTGGGTTCATGCCATTCT

>17956069

AAATTAATTCAAGGTGGATTAAATACTTAAACGTTAGACCTAAAGCCATAAAAAACCCTAGAAGAAAACCTAGGCATTACCATTCAACTTTTTTTTTTTTNGACATGGTCTTGTTCTGTTGCCCAGGCTAGATTGCAGTGGCATTCATAGTTCACTGCAGCCTTGACCTTCCAAGCTAAAGTGATCCTCCCATTTCAACCT

>17959062

GCTAGTGAAAAGTGCACATAATTATTATGCACAGTTTTAGTGGTTACATAGTGAACTCAAGAGTTTAGAGGATTTCTTTAGAGCTAAATGATTTTTTTTTNGTGGATAACAAAAGTAGAAAAACAACTAAATTTAAATATTTATGGTACGTTAATTTGCTAAGCATAGCTAGCCAGAAGAAGAATGCCTGAGAAAGCAGCA

>17959187

ACTAAATTTAAATATTTATGGTACGTTAATTTGCTAAGCATAGCTAGCCAGAAGAAGAATGCCTGAGAAAGCAGCAAATCAACCCCAGGGAGAAAAAAAANTGTCTGCAGAGTTGAAGCTAATTTGCCATAACTAATACTATAACTTCCATGGAAAATGTTAGTAACAAAAGATTGCCACTGGATTCTTGGTCCTTTGAGA

>17963672

AGATTCCCTTGAGTGCCTACACCACAAGGATCCTGGATTTCAAGCACAAAACTGGACAGCCATTTGGGCAAACACTGATCTAGCTGCAGAAGTTTTTTTTNGTTGTTGTTGTTATTTTTTTTTTTTTTAATGTATCCCAGTGGTGCCTGGAATACACCAGTGAGACAGAACCATTCACTCTCCTGCTCTCCTGGAAAGGGG

>17963699

GGATCCTGGATTTCAAGCACAAAACTGGACAGCCATTTGGGCAAACACTGATCTAGCTGCAGAAGTTTTTTTTTGTTGTTGTTGTTATTTTTTTTTTTTTNAATGTATCCCAGTGGTGCCTGGAATACACCAGTGAGACAGAACCATTCACTCTCCTGCTCTCCTGGAAAGGGGACTGAAGCCAGGGAGCCAAGTGGTCTT

>18023499

TACTTTCTGATGTTCTCAGCAAACTTAAAATCAAGAGACAGGATTTTCCTAAAATTGGGCCATCTAAAATCAGAGGTGGGAAATACAGACTTTGTAAGAGNAGTCCATTATGCCTATCTAATATAATTCAAAGTATCTTGAAAGATCCAAATTCTCTCTCAACCCCAAGCTACAGTTTGCAATAGATGTCCACTACCATGC

>18024709

GGCTTCCCCATTCCTGCAGAACTGGGAGTCAATTAAACCTCTTTCCTTTATAAATTATCCAGTCTTGAGTATTTCCTCATAGCAGTGTAAGAACTAACTANTACATCTGTTCATTTGTTTTCAAATATGTGATTCCCCCAGCAGCATGGGTGATGTTATGACAAAGATTGTGTCTTATTTTCTCTTATTTCTCCAGCACAG

>18031987

CAATATTTATCTTCTTTTTGTTTCATTTCTCTTTTTTTCCTACAGTGAACCAAAACTATGAAGGAAGGAAGGAAAGGAGGAAGGAAGGAAGGAAGGAAGGNGGGAAGGAGGGAAAGAAGGAAGGAAGGGAGGGAAGAAAGAAGGAAGAAAGGAAGGAAGGAAAGAAGGGAGGGAGAGAGGGAGCAGAAAGGACGAAAAAGA

>18039093

GTAGCTGGGTGATGAAATAATCTGTACAACAAACCCCATGACAAAAGTTTCCCGATATGAGGCACCCTCACATCTACCCCGAGACTAAAATAAAATTTTTNAAAAAGGGAATGTCAATTATGCAAACATTGAATCCTGCTTGTCTTTCATTGCTATCTAATCCAATGTAAAACATGCTTATCTTTCCTTGTGTCACTTGGA

>18045389

AATAACTTGATAGATATACTTCCCTAGGATCACAGCTAAAGTCCTCTGTTGCACCTGTAGTGCCTTCAGAACAAAGTTCACACTTTTTTTTTTTTTTTTTNGAGGTCTCCTCTCTCACCAGGCTGGAGTGCAGTGACATGATCTCGGCTGACTGTGACATCTGCCTCCTAGGTTTAAGCAATCATCCTGACTCAGTCTCCC

>18054015

CAATGTTTGAACAAATTTACATTCCCACCAACAGCGTAAAATCATTCCTATTTCTCCACAGCCTTGCCAGCATCTGTTGTTTCTTGAGTTTTTTTTTTTTNATATCTATATGTATATATGTACTTTAACTTCTAGGGTACATGTACACAACGTGCAGGTTTGTTACATATGTATTCCTGTGTCATGTTGGTGTGCACCCAT

>18068303

TGTCCCTATTGATTGATACCTGTAACTTCTAGCTATCTGATTTTTCCACAAATCCCCCAATACACATCTACACCAGTTTTTGAATCTACTTTTTTTTTTTNCTCCAAGGTTACCAATGACCTCAGGAAATGCAGTCAGATCCAATTATCTCCTCTTAGTCCACCACTGGCATTACAGTATTTGACTCTATTCACCCGCATC

>18070685

TGACAGTATGTTGTATGTTAGTGTGTATTTACATGTGTATATATGTATAGGTACATATATTCATATATATGTGTGCATGTGTGTGTGTGTGTGTGTGTGTNCACTAAGCTCTTATTTGTTCCCCTACTGACTGTTTTTATTTATTTGGATAACATCTTGAACCTCTTGTTACTACCTGTTATTACTGTTCAGAAGTTTGGC

>18078981

TTTGATAATGAGTAGGGAAAGTATAATTAACAAGAACTTATTGTATGTTTTTAAATAGCTAGAAGAGAATGATTGAAATGTTCCTAACACACACAAAAAANGATAAGCATTTAAAAAGATAGATACACCAATCACCCTGATTTGATCATTACACATCATAAACAGGTATCAAAATCTCACTTTGACCACCAAAATATATAC

>18095400

AGTATTTTGGAGGAAGGGAAACAATTTATAAAATGACTACACAGGGGGAGATAACCTCAGCTGAACATATTTTACGTGGTAAAGTGAAAAGAAAAAAAAANCCTCAGAGTTTGTGTAGAGCTTCCTTTCTTTAAAGGTAGTTTATTTCTATTTCTATTTTAGCTAGAATGCTTTTCTCATTGACAAATAAAAATTGTATAC

>18111539

GCTCATACCAAAATTTGGTCTGGACAAATTTTGCCGAGAGAAACTATTTGCAAACATTTCCTAGGATAAGAATGTAAGACTGTATGGTATAGTTCACTTTNCTATTTCTTTACATCATCTTCCCTTTTGCTATGTTCTTGCAGGGAAGGATGGTTGCTAAAGATACTCAGAAGAGTTCCTTTCATCAAGGACACTAAAACG

>18122173

TTACTTCAGATATCATTGCATTTTCCTCTGGTTCCTGCACATATTTTAATCTATCAGTCTTTCTTTCTCCTTTTCAACATGATTCCTGGTTTTCTATAACNGTTGCTAAGTGCTTTGCATTTTAAATAAATTGCCACTTATTTTCTTAGTATGACTTCCATCAGTCACATTAGTGAGAGTCATTGCAGAGGAGATAGGAAA

>18124647

ATAAAATACGCAAGAAAAAGTATTTACTTCCATAATGTAAATGTCTTTCTACACATAAAATATCTGTCTGGACCACCAGTTGTATTAAAAAAAAAAAAAANCTACTGATGTTTACATACAGGGTTTCTTTCAGTATTCTGACTCCAATTTCATTCTTAACATTTTTTTCTCTGTGATATAAGACTAATTAAGCCTAACATT

>18124714

CTGGACCACCAGTTGTATTAAAAAAAAAAAAAAACTACTGATGTTTACATACAGGGTTTCTTTCAGTATTCTGACTCCAATTTCATTCTTAACATTTTTTNCTCTGTGATATAAGACTAATTAAGCCTAACATTTGCTGTTCTTGGGAAAGATGGTTATTTCAACCATATCTAATAACATCTTATGGGTCTTCAGAATTGA

>18161560

TAGAGAATGAAGCACTTTTACAACTTCGATTAACTTTACACAGAAGGATGAGATCATGTATTTGGAAGGTAAACTTGGGATTTCTAGGTTGATGAGTGTGNTTAGTAACACCTTAAGGAATAATGACCCCACTATAAAAAGTGGTTAAGCAATGGGATAATGTCTCCAACTCTTTATTTGCTGGGAGATAAAAAATTCTAA

>18170272

TCATCAGTGAATTTTTTTAAAGGATATTGGCAGAAAAGGAATAACAGGGGTGATAGAGATTCATTCTAGTGACAGAATGGGCTTTCAATAAATAGAAAAANGTAATGTGAGAGAAATATACAAACACCATTTTATCTGATGTGTCCCACTTGGAGAAATTGCTTTATTATCAATATGTGTAGTTGTAAAATAATCTTGCAC

>18186975

AGTAAGGAAGTTCAGCAGTCCCTGCAACACCCAATTCTTGGAGTACAAAACCAAAATGGTCAGCGGAGACTAGTGCAAGATCTTAGACTCATGAATGAGGNAGTAATTCCTCTATATCCAGTTGTACAAAACCCCTATATCCTGCTCTCTCAAATACCAGAGGAAGCAGAATGGTTCACTGTTCTGGACCTCAAGGATGCC

>18192043

GGGTGTCCTGTTTAGAGGGGGGATTGAGAGGTGAAGCTGCTTGGGTTTCTGGTTTGGGTAGGGACTTGGAGAACTTTTATGTGTGGCTAAAGGATTATAANTGCACCAATTAACACTCTGTGTCTAGCTAAAGTTTTGTAAATACACCAATCAGTGTTCTGTGTCTAGCTAATTGGGTAGGGGACTTGGAGAAATTTTCGG

>18227563

AGATTCTGGATATTAGCCCTTTGTCAGATGAGTAGGTTGTGAAAATTTTCTCCCATTTTGCAGGTTGCCTGTTCAGTCTGTTAGTAGTTTTTTTTTTTTTNGCTGTGCAGAAGCTCTTTAGTTTAATTTGATCCCATTTGTCAATTTTGGCTTTTGTTGTCATTGCTTTTGGTGTTATAGACATGAAGTCCTTGCCCATGC

>18255167

GAATGGTGTGAACCCGGGAGGTGGAGCTTGCAGTGAGCTGAGAAGGCGCCGCTGCACTCCAGCCTGGGCGAAGGGTGAGACTCAGCCTCAAAAAAAAAAANTAAAATAAAAATAAAGAAAGAAATAAGATATGTGTTTAAGAGGGCCAGTTTTTATATTAATTGATTATTATATGACTATTCATCATTACTGTTTAAAAAC

>18541729

AAACAAACTAGAACTCAGGATTAAGAAACTCACTCAAAATCGCTCAACTACATGGAAACAGAACAACCTGCTCCAGAATGACTACTGGGTACGTAAAAAANTGAAGGCAGAAATAAAGATGTTCTTTGAAACCAATGAGAACAAAGACATAACATACAAGAATCTCTGGGACACATTCAAAGCAGCATGTAGATTGAAATT

>18565606

GCTCCTGACTTCGTAATCCTCCCGACTTGACCTCCTAAAGTGTTGGGATTACAGGCATAAGCCACCGAGCCTGGCTAATTGGGTGATTTTTTTTTTTTTTNAATTTGTTATCCTTGATTTTGAAGTGTTTTTGTATATTTTGGATACAAGTCGTTATCTGAAATGTGTTTCCAAAATGTTTTCTCCCAGTCTGTGACCTGC

>18606867

ACATTGTCTTCCACAATGGTTGAACTAATTTACACTCCCACCAACGGGTAAAAGTATTTCTTTTTCTCTACGATGTCATCAGCATCTGTTTTTTTTTTTTNGGCTTTTTGCTAACTCATTCTGACTGGTATCAGGTGTTATGCCATTTTGGTTTTGACTTGCATTACTCAAATATTCAGTAATGTCGACCTTTTTTCATAT

>18608602

CTTGTACATCGTGGTGACTATAGTTAATAATAATGTAGTATGTACTTGAAAATCATTAAAAACAGTAGATTTGAAGTGTTCTCACCACAAAAAAAAAAAANTGCATGTGAGGTGATGCGTATGTTAACTAGCTTATTTAGCCATTACACGGTGAATACGTAGTTGAAAACATCATGTTATACAAGATAAATATATATAATT

>18616530

ACATCACTTTTAATTATCTTTTCAATTAAAATCATGAAGTCATAAGAGATAATCACATGACAAAATTAAACAGTCGCAATAGAGTGCCAGCTTTGAAAAANGTCATCATTTCTTAAAATAAAGCTAATTTAAAAATTATTTAAAGAAGTTCATGCATTTAAGCAATTTGTACTAGGCACTAAATTCCTATTACCAGTTTCA

>18641978

TGGCTTGGTCCTGGAATGTCAAGGATGCAGTGAGCCAAGATCACACCACTGAACTCCAGTTTCTGTGACATAGCAAGAACCTGTCTCCAAAAAAAAAAAANGATATATTGATTACAGATATAGATAAAGATAGCTATTGAGAGGCATAGATATAGATGTATGAGAGGCAACTTATAAGGGGATTTGCTCATGCAATTATGG

>18653704

AAGAGACCCATCTCACGTGCAAAGACACACATAGGCTCAAAATAAAGGGATGGAGGAATATTTACCAAGTAAATGGAAAGCAAAAAAAAAAAAAAAAAAANGGTGTGTTTTAATTTCAATAGCTTTAGAGCTGCAAGTGGCTTTTGATTACATGGCTGAATCATATAGTGATGAAGTCAGGGATTTTAGCTGACCTGTCAC

>18691852

AAGTTCTTGACATGAGCAAGACAACCTGTGACATACATGGATTAGCTGATATAAACTCTCTGAGATAGATAGGTGCTATTATTAACCTTTTTTTTTTTTTNGAGACAGGGTATTGCTCTGTTGCCCAGGCTGGAGTGCAGTGGTGCAATCATAGCTCACTGCAGCCTCTACCTCCCAGGCTCAAGCAGTTCACCCACCTCA

>18695924

CAGTCCTCCCACCTCAGCCTCCTGAGTACCTGGGCCCACAGGTGTGCACCATCATGCCTGGCTAAGTTTTTTTTAATTTTTTTAATTTAATTTAATTTAANTTTTTTTTTTTGTAGAGACAGGATCCCACTGTTGCCCGAGTTGTCTCTGAACTCCTGGTCTAAGTAGTCCTTCCACTTTGGCCTCCTACAGTGCTAGGAT

>18737511

TCTGGGTTCAAGCAATTCTCCTGCCTCAGCCTCCTGAGCAGCTGTGATTATAGGTTCGTGCCACCATGCCCAGGTAACTTTTTGTATTTTTAGCACAGATNGGGTTTCATCATGTTAGCCAGGATGATCTTGATCTCCTGATCTCATGATCCCCCTGCCTAAGCCTCCCAAAGTGCTGAGATTACATTCATGAGCCACCGT

>18762764

AAATAATTAAGATTTTTATTATAAAAGCCATGTTCATCATTAATTCATTCCTTTGTTTAATATTTGTTAAGGACTATATATCACATAAGGAAGTAGGAGTNAGGTTAGAAAATGTATCAGATGAATTCCTGATCACATGTTCTTTTATAATAGTAAAGGGTGTATACACAGAAAAAGTAATTAGTCAATAAAAATAAGTTG

>18780082

GCTCAAATCCAGCTGAATCTCCCATTTCAGTCCTTTTCACTTCAATGCTGTCCTCTTTTTTTCTCATGAGTAGAAGGTAATTGCAGTCTTTTTTTTTTTTNCTTTTGTTGAGACAGAGTTTTACTCTCGTTGCCCAGGCTGGAGTGCAGTGGTAATATCTTGGTTCACTGCAACCTCCACCTTCCAAATTCAAGTCATTCT

>18789568

GGAGGTGAGGCAGGCAGATCACAAGGTCAGATCAAGACCATCTTGCTAACACAGTGAAACCCTGTCTCTACTAAAAATATAAAAAATTATCCAAGCCTGCNCAGATGCCTATAGTCCCAGATACTTGGGGGGCTGAGGCAGGAGAATGGCATGAACTGGGGAGGTGAAGCATGCAGTGAACCAAGATTCTGCCACTGCATT

>18818406

CTTTGACAAACCTGACAAAAACAAGCAATAGGGAAAGGATTCCCTATTTAATAAATTGTGTTGGGAAAACCGGCTAGCCATATGAAAAAAAAAAAAAAAANCTGAAATTGGACCCCTTCCTTGCAACTTATACAAAAATTAACTCAAGATGGATTAAATGTAAGACCTAAAACCATACAAACCATAGAAGAAAACCTAGGC

>18836745

CTCAACCATCTCTTAAAATGTGATATAAAATACAAAAATATAATCTAGTCCTTGGGAAGCAATAGAAATTCTGAGGTGGTGAAGAAAAGAGTCTTTTTTTNAATTGTTATTTTTGGGTCAAAGTCTTGCTCTGTTATCTAAACTGGAGTGCAGTGGTGCAATCATAGCTCACTGCAGCCTCAAACTCTGGGACTCAAGTGA

>18864965

CTTGGCTCCCTGGCTTCAGCCCCCTTTCCATGGGAGTGAATAGTTCTGTCCCACAGGTGTTCCAGGTGCCACTGGGGTATGGAAAAAAAAAAAAAAAAAANCTTCTGCAGTTAGCTCAATATCTGTCCAAATGGCCACCCAGTTTTGTGCTTGAAATTCAGGTTCCTGGTGGTGTAGGCATCTGAGGCAATCTCCTGGTAT

>18872086

TCTTTATGACATTTTTTCCTTCATCCCTTCCTTCTTCCTTCCTTCTTTCCTTCCTTCCTTCCTTCCTTCCTTCCTTCCTTCCTTCCTTCCTTCCTTTCTTNCTTCCTTCCTTCCTTCTTTCCTCCCTCCCTTGCTCCCTCTCTCCCTTCCTCCTTCCCTCCCTCCTTTCTTTTTCTTTCTTTCTTTCTTTCTTTCTTTCTT

>18890647

AGTAGGAAAGAAAGAAGGAAAGAAAGAAAGAAAGAAAGAAAGAAAGAAAGAAAGAAAGAAAGAGAAAGAAAGAAAGAAAGGAAGAAAGGAAGGAAGGAAGNAAGGAAGGAAAGAGGGAGGGAGGGAGGGAGGGAAGGAAGGGAGGGAAAGTGAAAGCAAGCAAGCAAGCAAGCAAGCAAGCATTCTTCGTATCAAAACTTC

>18894228

ACTATGGTAACCAACTTATTATCTGTTGGTATCCCATAACCTCATTATGTTATCCTTAAATATACAAAATTAAATATATTTAAAATAAAATACTGTTTTTNAAAAAAACCACAAGGGCACTGGACATATAAGGATCCAAGAAGGTGAAAATGATACAGACAGCGACAAGAGGAGCAATAATGTTCTGTAGGTAGCTGTCGA

>18896965

TAATTTAGATGTCTTTTACTAACTCTGTAAATATTAATATCTGTGTCTATGAAATCCATAATGATCCAATCTATATATGCAGTGACAAGAAAAACAAACTNATTATATGAAATGAGAGCTTTAGAATAGAGAAATATTTTATTTTTTACTTTATGCTTGCCTGAGTTTCATCTTTTGTCAAAAACTACACGTTACTTTATA

>18917581

AGTAGGTACAGTGCTAACTATTCTCAAAGTAGGTGCAGTGCTACATTTTTGATAAAACAGAACAAAGACATTAAAATTTTACTGGAAAATTAGTTTTTTTNGTCAGTGGCAACGTTATATTAATCTAATTTCTTTGCTAGTTTTTGTTTCCTGGCAGATAGAAATGGTAACATTTCTTTGGATGTTACTGATAGTCCCTAC

>18925711

CCGGCCTGTACTTGTTTTTTAAAAGACCATTTGTCCTATAGTTTTTATCCAGTATGAAATTTGTTTATTGCATATACAGAGAAACCTTGCCTTTTTTTTTNCATTCTAAGTTAGTAGTAGAGGCTTGAAGATTTAAAGTTTTATTTTTTTATTTTTTATAGAAAATAGTTTATAGGTATATACCATCACCAAAATTGCCTC

>18932947

GCATGGAATATTTTTCCATTTGCTTGTGCCCTCTCTTATTTCCTTGAGCAGTGGTTTGTAGGCACTTAAAGTATAATAAAAACAAAAATTAAAAAAAAAANTAAGGTACTAGAACTTTGAAAGTCTGAGGAGTTGACTTGGAAAAATACAAAACTCTGCAATAAGAGGTAGAGGTCTGAACATATAAATGCATAATTAAGA

>18955867

TGTGCCACTGCACTCCAAGCTGACAACACAGCAAGACTTGTATCAAAAAGAAGAAAAAAAAAGTAGAGAGCTATATTTGATGCAACTTGCTAAAAAAAAANTAAAAATGTGTTTTTTTAAAAAAATGAAAGATGACGTTTGAATATGTGCCCTGCACAAAGGGGAGCTTGCAACATAATTAATTATCAGGGAAATGCAAAT

>18959527

TGAGCATATAATTAAAATAAAAAACCTTTGAATTTGGTTTGTTCTAAACAGCTATATTGGAAAGAAACATCACAAATAGAAATGTTTGGATAGTGAATTANAGCACAAAATTAAAAGGAACATGAGTTTACCAACATCACAGAGTGTTCAGTGGAATTTCTTCATATTTTTCATTTTCTCATCTTGTAGCAACTTTGCTAA

>18963466

ACTTTGGGAGGCGGAGGCAGGCAGATCACTGGAGATCAGGAGTTTGATACCAGCATGGCCAATATGGCAAAATCCTGTCTCTACTATAAATAAGAAAAAANTGGTCAAATATGGTGGTATGCACCTGTAATTACAGCTACTCTGGAGGCTGAGGCATGAGAATCACTTGAACCAGGGAGGTGGAAGTTGCAGTGATCTGAG

>18994876

GAGGGAAAAAAGGAGAAGGAAGGAAGGAAAGAAGTAAGGAAGGAGGGAGGGAAGGAAGGAAGGAAGGAAGGAAAGAAGGAAGGAAGGAAGGAAGGAAGGANACGGAATAAAAAACACAAACCAACAAATAGTAAACACATTTGTCCAAGGTGTTACAGAACTGAAATGTAGAATCTACATTTACAAGTATACACTTTCAAG

>19038277

AGTCACAATTTTATCCAGGTTGGTTTCTTTCAAAGACACAAAGATTTTCTTTTCAATAGTAAATCTCTAATCCATTTAGACTTAATTTTTTCTCTTTTTTNGCTTCTTGTGGTGAAGAAAATGAAAGTACTTCACCGCAATATGTGGCTCCCTTAGTATAATAAGTATTTCACATTAAATACCCTTGGAGACCAACAAGCA

>19054358

ATTCACCTCCTTGAGCTGTTTAACTTTTGTCCAATTCTGTACCCTCATTCAGAAATATATCTTTTGTACTACCTCCACAGAGTTCTTTTTTTTTTTTTTTNGAGACAAAGTCTCACTCTTTCATCCATGCTAGAGAGCAGTGTCACAATCTCAGCTCACTGCAGCCTCCACTTCCTGAATTCAAGTGATTCTCCTGCCTCA

>19057889

TAGAAAGTACCGTATTTCATATATTAACTCATTTTATTCTAAAAAGTAGTCATCTAGCCTAAGCAATATAGGAAAACATTGTCTCTACAAAAAAAAAAAANGAAAAGAAAAAGAAAAAGAAAAATTAGCCAGGCATGATGGTGCATACAGGTTGTCCCCGGTTACTTGGGTGGCTGAGGTAAGAGGTTTGCTTGAGCTCAG

>19079174

TGGATAATTACTTGAAACCACAAGGCAGATATTGCCATGAGCCGAGATCATGCCACTACACTCCAGCTTGAGGAACACAACAAGAGTCCTTCTCAAAAAANGTAATTTTTAAATTAATTTATTCACCTTCACTCTGGGGGTTTCTCCACATAAGCAATGTCTTTTTTTTTTTTTTTTTTTAGAGGGAGTCTTGCTCTGTCA

>19096900

TTGGCAGTTATTTTTGTCCCCCCTAAAAAGCTAACATTTTCACAATTCAACTGGAAAAAAAATGTGTTATTTGATGGAGTCCTAGGTGGCATTAGAAAAANGCAGCTTGAAATCTTACTGTCGGGCGGAGGAGCCAAGATGGCCTAATAGGAACAGCTCAGGTCTACAGCTCCCAGCATGAGCGAAGCAGAAAACGGGTGA

>19106427

AGAGGAAATAGAAACATTCTGAGAAAAGCATAACATTGTGAAACCAACACAAGAAGCCACAGAAAATTTGGGCACTATATCTAGTAAAGAAAGAAAAAAANTTATTAATTATGGATTTCAATATTAATTTGGGTCTCAAAAATTGAAGATGGGTTTCAACATTTCCCATAAATGAAACTTCAGATACTGATTGTTTTCCTA

>19122341

ATTTGGTTTGTTTTGTTTTCTGTTTCTACATTAGTTTGAGAAAGACAATGGCCTCCAGCTCCATCTATATTACTGAAAACAACATAATCTCATTCTTTTTNATGGCTGTACAATATTCCATGGTCTCACTCAGCTTTGTTTTCTTTCTTCCTAGTGCAGGATGCAATTCTTGGCTTATGATAGGTCCTCCATGAATATATA

>19128823

AACCCAGGAGGTTGAGGTTGCAGTGAGCTGAGATCGTTCCACTGCACTCCAGCCTGGGTGACAGAGTGAGACTCTGTCTCAAGAAAAAAAAAAAAAAAAANGATTTTCTTTTAGGTGTGGTATATTATCAGTACTTGGGAGCATCCTGTGGACAAATGAAAAGAGGACATGGAATCTGTTTAAAAATATATGTTCTGTTCC

>19129806

GGGTGAAGATTAAAAAACTACCTATCAGGTACTGTGCTCCTGGGTGATGAAATAATCTGTACACCAACCTAAAATAAAAGTTTTCATTAAAAAAAAAAAANCAAGAAAACAACAACAGCTGTAGGCAGGTGACCTCTTAGATCTCTGCAAGTGAGCCTCCTAGACTTTGGATGCATCTGTTTACATTTTGTTAATGATGGT

>19143142

GTTTATTGTTTTAGTTTGAGTAGACCCTTCTGTCAGGGAAGGTCTGTCCAGTGCATGAAGGAAGGACTATCTGGGTTGCGGGAATTTTTTTTTTTTTTTTNGAGACAGAGACTCACTCTGTCACCCAGGCTGGAGGGCAGTGGCATGATCTTGGCTCACTGAAAGCTCTGCCTCCAGGATTCACACCATTCTCCCTTCTCA

>19158005

ACACGGGAGATATAGGAAGTGTGTTATACGTAGATTTAAAACAGAAAGCATGCCCTGCACAGGGGAAAAACAGGAAGCGTGTCTTCCACAGGGAAAAAAANGCTGGAAATGTGTCATGCACATGGGAGTAACACAAAATGGGTCATGTACAGACAGGGAATGGAAAGTGAGTGCTACACAGGGAAGAAAGGAAAAATGGGT

>19158487

AGGGAAGAAACTAGAAGTGTGTCATTCACAGGAGAAACACGAAAAGTGTGTATTGCACAGCAGAGAAACAAAAAGTGCATCAGGCACAAAGGAGAAACAGNAAGTGTGTCCTGCACAGGCGAAAAACATGAAGTGTGTTCTACATAGGGGAGCAAAAGAAAATGTGTCCTGCACAGGGAAGAAACAAGAAGTGAGTCTTCC

>19163930

AAATCAGGACCTGCCAAAACATACTGCAGAGCAGAGATGTCTCTCTGAGCCTAAGTTTTCAGGGGGTCCTCAGAGAGAGCTGATTGAATGGCATTCTTCTNGTTAGAAGGTGAGGGCTGAGGTAACAAGCGGGCAGGACAATTTGAGATGGAAGAAGAGGAAGAAAAAGTCTCTTTACCTCCAGTGTCAGCCTCCACATCC

>19170137

TTTCTTTGTTTGGATTTTAGTTTTTGTGACTTCTACAACTTAACAATTTGGGGTGCTGTCTTCTTCCAAATATTTAATAAATTCTTATTCTGTCTTCTTCNAGTTGTTTCTGTGCATTGGTTTGTAATTTTACTTATTTGTACATCATGATATCTCATTCTAAATATTTAAATCCAAATTTTCTTTCAACTCACTTGCCAA

>19183369

CTGGACAGGGGAGGAAGAGGAAGTGTGTCCTGAGCAGAAGATGAACCGAAAGTGCAACCTGCCCAATAGAGTAACAGAAATGATTTTTTTTTTTTTTTTTNAGATGGGTTCTCGCTCTGTCACTCAGGCTAGAGTGCAGTGGCGCGATCTCAGCTCACTGCAAGCTCCTCCTCCCGGGTTCACGCCATTTTCCTGCCTCAG

>19188046

GGCCCTCTCAACCTCTCTTCCCCTTCCACGCTTAGGCAACCCCAATCTACTTTCTGTCTGTAAATATATGCCTATTCTGAACATTTCAAATAAATGTCTTNTGTGACTGGCTGTTTTTGCTTAGATAATGTTTTTAGTCTCATCTGTTCCTCCTCTGTGCAACACAAACTTCCAGTCCAGTATCTCCCCATGGAGCACACA

>19202782

AGGCCACGGTAGGTGGATCACCTGAGTTCAGGAGTTCAAGACCAGCCAGGCCAACATGGTGAAACCCTGCCTCTACAAAAATACAAAAAAAAAAAAAAAANTTAGCCAGGCCTGGTGGTGGGTGCCTGAAATCACAGCTACTTGGGAAGCTGAGGCAAGAGAATTGCTTGAACCTGGGAGGCAGAGGTTGCAGTGAGCTGA

>19228913

TTTGGGGGGCTGAGGTGGGAGAACCACTTGATATCAGAAGTTCAAGACCAGCCTGGGAAACATAAAGAGACATTATCTCTCTCTATATATAAAAAAAAAANGCCAGACATGATAGCAGGCACCTCTAGTCTCATCTACTAAGGAGGTTGAGATGGGAGGATCACTTGATCCCAGAAGTTTGAGGCTACAGTGAGCTCCACT

>19263893

GATAATAGAAATTGGTAAATTTGAATACATTGAGCCATTGGTTGGCATCAAGGAGGCTCCTCATTGATGTGGGGGACAACTAGCTTCATGAAATTCATATNGAGACAGATTCCACAGAGGCAAGAGATCCTTATGAGTCCCAGAACTTGAGTTAGTCCCACTGTTTCCCATGGTTTAAGATTATGCTTCATTGGTATTGAA

>19265100

CGTGTGTAAGTATGAAACTGGGTCCCTATCTCCCACTGTATACAAAAAATAAACTCAAGATGGATCAAAGACTTAAATCTAAGACCTGAAACCGTAAAAANTCTTAGAATAATACCTAGGAAAACCCTTCTAGACATTGGCTTAGGCAAAGACTTCATGAAAAAGATCGACAGTGCAACAAAAACAAAGATAAATAGGTGG

>19271563

GGATAGCTTAAGCTGTGGAGTTTGAGACCAGTCTGGTTGAAACCCCATCTCTAAAAAACAAACTAAAATAAAACAAATCCATCTCTTAAAAAAAAAAAAANGACAAAAATTAGCTGGTCGTGATGGCATGCACCTATAGTTCTAGCTACTTGGAAGGCTAAGGTATGAGGATTACTTGAGCCTGGGAGGATCACTTGAGCA

>19272160

TTGAACCTGGGAGGCAGATGTTGCAGTGACCTGAGATCATGCCACTGCACTCCAGCCTGGGCGTCAGAGCAGGACTCTATCTCAAAAAAAAAAAAAAAAANGAAATCTTGCAAACATGTAAAAGAATGCCATACTTCTCAGTATTTTTTTTTTATTTTTTGCCTTGAAACATGTAGTTATTTTCACCAAAATATGGTGTTT

>19305555

GTGGCCCACATCCAGCACCGAATGCTCAGAGCCCACAAGAACTGTATCCTGCTGCAGGACCTGGAGCTTGCAGGCCTAGCAGGAGGGCCTGGCCTGGCCCNGCCTGGGCCTTTCCCATGTTGGGCTGCCATCTTCCATCTTGTGAGGCTCCAGGGGACCCTCTCAATCCTTGATGCTGGCTATTCCCAGGATCTCCACGGA

>19332645

AGAGAAATGTCATTCTTAGCCAGAGCTTACATTATAGAATTCTATTCTGCATTTTCACTCTGAGATCAAGTGTTTGACAAATAAGCACTTTTTTTTTTTTNGCCATTCACCTAAACATCTCTGCAACTCAGATCTTTCCACATACCAAAGCAGTAAAGCAATGTCCATCTCAGAAATGCCTAAGATAAAACACACAGATCT

>19339981

GTTTTATTCTTTTGCCTTTTATATCCATTGTAAATTTATTTGCACATTTCTTGTTTTCCAGATGTGTTTAGGTAGACTTTGACCGGAATTTTTTTTTTTTNCTTTCTTTTTTTTTTTTTTTTTTTTTTTTTTTTTTTGAGACGGAGTCTCGCTCTGTCGCCCAGGCTGGAGTGCAGTGGCGGGATCTCGGCTCACTGCAAG

>19353809

CCAGTATTTTATTGAGGATTTTTGCATTGAAGTTCATCAGAGATATTGACCTATAATTTTGTTGTTGGTGGTGATGTTGTTGTTGTTGTTGTTGTTGTTGNGCCTCTGCCAGGTTTTGGTATCAGGATAATGCTGGCCTCATAAAATGAGTTACGGAGGATCTCCTCTTTTTCTATTTTTTGGAATAGTTTCAGAAGGAAT

>19356977

GGCAGAAGAATCACTTGAACCTGGGAGGTGGAGGTTGCAGTGAGCCAAGATTGCAGCAGCCTGGGTGAAAAAGTAAAACTCTGTCTCAAAAAAAAAAAAANGAAAAAGAAAAAAAGGAATTCTCCTAAGCCTGTGAGTGAAAGCCTGGAATGTCTTGCTCTTTTGGCAAAATGTTTTCCTGATTTTTGACCTCTAATCCAG

>19372231

AGAGGTGGCAAAGGAGGAAGGAAATCCTCATGAAAGTGGATCCATGAAGTTTAAACCTATGTTGTTCAAGGGCCAATTATGTATGTATAGAGAGAGAGAGNAAGAAAGAGGGAGAGAAAGAGGGAGACAGACAGATATACAGAGATAGATAGATGATAGATAGATAGATAGATAGATAGATAGATAGATAGATAGATATAG

>19377257

GAAGGGAAGAGAGGAAAGAAAGAAAGAAAAAGAAAGAAAGAAAGAAAGAGAGAGAGGGAGGGAGGGAGGGAAAGAAAGAAAAAGAAAGAAAGAAAGAAAGNGAAAGAAAGAAAGAAAGAGAGAGAGAAAGGAAGGGAGGGAGGGAGGGAGGGAAGGGAAGGGAAGGGAAGGGAAGGGAAAGAAAAGAAAGAAAGAAAGAGA

>19377335

AAAAAGAAAGAAAGAAAGAAAGAGAAAGAAAGAAAGAAAGAGAGAGAGAAAGGAAGGGAGGGAGGGAGGGAGGGAAGGGAAGGGAAGGGAAGGGAAGGGANAGAAAAGAAAGAAAGAAAGAGAGAGAGAAAGAGAGAAAGAAGAAAGAAGGAAAGAAAGAGAAGGAAGGAAGGAAGGGAGGAAGGAAGGAAGGAAGGAAGG

>19377502

GGAAGGAAGGGAGGAAGGAAGGAAGGAAGGAAGGAAGGAAGAAAGAAAGAAAGAAAGAAAGAAAGAAAGAAAGAAAGAAAGAAAGAAAGAAAGAAAGAGANAGAAAGAAAGAAAGAGAAAGAGAGAAAGATTAGCTAGGTATGGTGGCTCAGGCCTGTATTCCCAGCTACTCAGGAAGCTGAGGCGATAGAATTGCTTGAA

>19411188

ACTGAAAAGCAATGATTAAATTTTTCATTTGCAACCTTAAAAGAATTTTTAAACTCATTAGAGAAACTTAAATAACATGAGAAATGATAAAAAAAAAAAANGATGACCATTCTGCCGAATCTAAATTAGGTAGCTGCTATTATGATTGTGGAGACAAAAACTAACCATGAAAATGACAATCCATTGCATTGCGAATTGTAT

>19418580

CTACACATTCTGCATATGTATCCCAGAAGTTAAAGTAAAATAATTAAAAAAAAAAAAGAAAAAGAAAGAAGAGAAAGAAAGAAAGAAAGGAAGAAAGAAANAAAGAGAAAGAGAGAAAGAGAAAGAAAGAGAGAGAGACAGACAGGGAGGGAAGGAAGGAGGAAGGGAGGGAGGGAGGGATGGAGCGAGGTAAGAAAGAAA

>19423199

TCTTCTTTCTCCTACTTCTCTGCTGCCTCCTTGTTCTTCTTCTTTTTCTTCTTTTTCTTCTTCTTCTCCTTCTTCTTCCTCCTCCTCCTTCTTCTCTTTTNCTTTCTTCCTCTTTTTCTTTTTCTTCATTTTTTTCATACTCATGTTTCCATTATGGATACTTGTCAACAAGAATGGAAAAATAAATGAATCTTATTTTAT

>19435305

AAACACATGAAAAAATGCTCATCATCACTGGCCATCAGAGAAATGCAAATCAAAACCACAATGAGATACCATCTCACACCAGTTAGAGTGGCAATCATTANAAAGTCAGGAAACAACACTTGCTGGAGAAGATGTGGAGAAATAGGAACTCTTTTACCCTGTTGGTGGGACTGTAAACTAGTTAAACCATTGTGGAAGTCA

>19438493

AAAAAGAATGAGAAAGGGAAAAGAAAGAAGAAAGACAAAGACATAGAGAAAGAGAAGAAAGAAAGAAAGAAAGAAAGAAAGAAAGAAAGAAAGAAAGAAANAAAGAAAGAAAGACAAAAAAGAGGAAGGAAGAAAGGAAGAAAGAAGAAGGAAGGAAGAGGGAAAGAAGGAAGAGGGAAGGAAGGAAGGAGAGAAGGAAGG

>19470790

TTGATATTTGTATTTGGTGTTTCTGTATTTAGTGCTGTATTTAATGATGGTCAGGAAAGCAAAGACCAAGGACCCAGAAAATGGAGAGTTTGAGGGCAGANTAGTAAGAAATGTTTTTTGCCTTTAATTTTAGTTGCAGGGGATATATTTATAAAGTCAATGAAATGTAAATTAGTTACCCATAAACATGTCCTGAATGAC

>19486322

ATGAGGGCTTCTTATTCAGTAAAGCTCCATTGTCCCTGGTCCAGCAGAATTCAATTTCCAGAAAATAGAGAGAATGGATTTCATTTTCTTCATTTTTTTTNATTTTATACTTTTATGTTAGATTCAGAGAACATATGTGTAATTTTGTAACCTAGGTATATCACGTAATGCTGAGGTTTGGCATACAGTTGATCCCATGAC

>19486939

AGTGAGTTATTTTCTTTTTTCTTTTTTTTTTTTTTTTGAGGTTTCAGGGCATCTTTGGTGCCACAGTAGCTCAAGAAGAGCCTTTTATTTTATTTTTTTTNATTTTTATTTTTTTATTATACTCTAAGTTTTAGGGTACATGTGCACATTGTGCAGGTTAGTTACATATGTATACATGTGCCATGCTAGTGCGCTGCACCC

>19518292

GCAGGGATCACAGGCATGAGACACCATGCTCAGCTCTATGACTGATTTTCTTATTTTTTATTGCCCTGTATGCCTACAACTATGTAAAAAAAAAAAAAAANCTACTTAAGAAGCTCAAGCCCGGTAAGATAAATTCCTGATTAGCTAACTCAGAACTCACAGTTGGGATTTGGTTTGCGTCTTGGTTTTTACTTTTTTATT

>19528950

TAGCTTTTTTCCTTAAGTAAAAGCTTTAAAATCATACTAATTTGGGGCTAGAATCTGGGGCCATGTATCTGAATAACAGGGTTTTATTTATTTATTTTTTNATTTTTATCTGCTATTTAATGGAAATTTGTAAAGGGTTCTAATAAGTTTATGAAAATCTTACTTTATAGTCAAACTGAATAAAACTGGATACAGACATAA

>19530323

TTACTTTGGATTGTGTTTGTATAAATATGTTAGTAGTGTATGTTCCAAAATTATGGGAAGCTTCTATAATGTTGATATAATTTAATATACTTTTTTTTTTNGACAAAGTCTCTCTGTCACCCAGGCTGGAGTGCAGTGGTGCAATCTCATCTCACTGCAACCTCCATCTCCTAAGTTCAAGGGATTCTAATGCTTCAGCCT

>19539577

ATGGGCTTTCACTATTTTTATGCGTTCATTGAGCATGATACTTTATCTAAGCACGGTGCATGTTAATATGCATTGTAAAGGAAGTTGCATAGTTTTTTTTNATTTTATTATTATTATACCTTAAGTTTTAGGGTACATGTGCACAAAGTGCAGTTTAGTTACATATGTATACATGTGCCCTGTTGGTGTGCTGCACCCAAT

>19547831

GACATGAACCTGGGAGGTGGAGCTTGCAGTGAGCTGAGATCGCATCACTGCACTCCAGCCTGGACAACAGAGCAAGACTCTGTATAAAAAAAAAAAAAAANGGACAAGTAGTTTGAACAGAAACTTTACCAAAGAAGATATAGAGTATAGTCTCATGAAAAGATGCTCAACATCTTTAGTTAAAGAAATGGAAATTACAAC

>19549409

CAAAGAATGATGTGTAGTTTGAGGCACTACTTTATGCACAGATTATGTTGTCAATATGCTTACTATTTTCATCAAAACTTGCAAAACCCTACAAAAAAAANAATGAGTTTTACTTTATATATAAGATAATCACAATTATTTTTAAAATCATCATTGTGAGAACACACATAAGAAACATATGAAACATAAAACAGGTGTCAG

>21033904

CCACAGAATAAAGATCTAACACTCTTAAATGATAAATTGCTAGGTACTCCCAAGCAATTAATATAAAATGAAGCAGAATTTATTTTTGACAGTTTTTTTTNGTAGAGTCATTACTGTATCTAAAATAAAAATATTTGCTCTGATGTTGAAGTGTTTATGAAGAACCTCCATGTATCCGTGTACCTTCTTAGTTGCCTACAC

>21044104

AATTGCTGAACCCTGGATGTGGAGGATGTAGTGAGCTGAGACTGTGCCATGGAACTCCAACCCGGGTGACAGAGTGAGACTCTGTATAAAAAAAAAAAAANTGTCAATGTCTCATTTTCCTGCCGCCTCTAGAGAGCTAGCTATCATCATTTGGCATATGTATAAATACCTACAGACAACATGTGGACAATTGGATGCGTT

>21050540

ATAACATTTTAGATTTCCTCTCTGGTAATTTCTTCTGTGGTATATGTGAGTCTGGTTTTATCCTTCAGCCTGTGTTGTTATTATTATTATTATTATTATTNGTCTTTTAGCACTCTTTACAATTTTTTTCTGAGAGCTGAATAAGTTGTATCAGGTAATAGGAATTGAAGTAAATAGTCCTTTAGTGTGAGTATTCAGGTA

>21071284

TAATCACTAAGATGCAATAAAATAAAGCTAACACAAAAATTCATGATATTTGGGTGACACACGGAATCTGGAGGTGGGAAAACTCAGATTTTTTTTTTTTNCTATAGCAGCATTGAAAACGGCAAGAAATGAGAAGATAGTTATAAAATCTCTAGGAAAAAAACATAGAGCCCGATAATCTTGTACCCTAATTGTCAGTCA

>21082290

AGCATGGCACCCCACACTCCAGCCTAAGTGACAGAGAGAGACCCTTCCTCAAAAAAGAAAGAAAGAAAAGGAAGGAAGGAAGGAAGGAAGGAAGGAAGGANACAAAAAAAGAAAGAAAGAGAGAGAGAGAAAGAAAGAAAGAGGGAGGGAGGGAAGAAGGGAAGGAAGGAAGGAAAGAAGGAAGGAAGGAAAAGAAAGAAA

>21082491

GAGAGAAAGAGAGAAAAAGAAAGAGAAGAAAGGAAGGAAGGAGACAAAGAAAGAAGGAAAGAGAAGAGAGGGAGGGAGAGAAGGAAGGAAGGAAGGAAGGNGGGAGGGAAGGAGGGAAGGAAAAGAAAGAGAACAGAAGACACAGAGACCAATACACATAAGGAGGAGAAGACAACACCACACAGTCATGATCCAGGCAAA

>21092194

TAGCAGCTAGCCATTATAAATAAAACTAAAAAATTCATTCCTTTTAGTATAAAAACAAACAGTAAATGTTTAGAATTTTTTTCTTTCTTTTCTTTTTCTTNTTTTTTTTTTTTTTTGAGACAGAGCCATGCTCTTTTGCCTAGGCTGGAGTGCAATGGCACAACCTCAGCTCACTGCAATCTTCACCTCCTGGGCTCAAGC

>21122971

AGGCCAAGCTAGCTGATCACAAGGTCAAAGGATCAAGACCATCCTGGCCAACACGGTGAAAGCCTGTCTGTACTAATAATAAGAAAAAAAAAACAAAAAANAAAAAAAAAACAGCTGGGCATGGTGGAGCGTGCCTGTAGTCCCAGCTACTTGGGAGGCTGAGGCAGGAGAATTACTTGAACTCGGGAGGCGGAGGCTGCA

>21122981

AGCTGATCACAAGGTCAAAGGATCAAGACCATCCTGGCCAACACGGTGAAAGCCTGTCTGTACTAATAATAAGAAAAAAAAAACAAAAAACAAAAAAAAANCAGCTGGGCATGGTGGAGCGTGCCTGTAGTCCCAGCTACTTGGGAGGCTGAGGCAGGAGAATTACTTGAACTCGGGAGGCGGAGGCTGCAGTGAGCCGAG

>21134768

AAGGCTAAAAAATGAAAATTTAATCATTGATAAAAACACTTATGGTTGACTTTCTTCACACAGTGGCTTTTGGTACTTAATAAATACAATTTTTTTTTTTNAAAGATGGAGTCTTGCTCTGTTGCCCAGGCTGGAACCCTGGTGTGCAATGGTGCAATCTCGGCTCACGGAAATCTCTCTCTCCCAGGCTCAAATGGTTCT

>21138769

GGGTGCAGTAAGCCGATATCGCACCATTGAAGACCAGCCTGGGGGACAGAGCGAGGTTCCATCCAAAAAACAAACAAACAAAAGTAAAGAAAAGGGGGGGNAAAAAAAAAGAAAAGCAAAGGGGAGGGGAGAAAGGGAAAGAGTGGTAAAGCTATCCGTGTTGGCTTGTTGGAATTTTTCCAAAACTAGGAACCCATCCTT

>21139820

GAATGTATTTAACAAACACATGTACCCCCAACATGTGTGCATCTATAATGTATCAATAAAAAAAAATTAAAAAGATAAGGAGGTCAGGAGGAAAACTGTGNTAATAATCAACCTGAGGGAAACATGCAGGCTGTCTTAGTCAATCAATTCACCCTTTTCCTCTTAATGTGCTAATTATCAATTGATATGGTCTGGCTTTGT

>21167090

ACAAACAAACAAAAAATTTGCAGAGATACACAATTTCTAATATGAGAAGAAAACCCATAACATAGTGCTGAATAAATATTCTACTAGAAAAAAAAAAAAANTATATAACATTATCCAACCATGTAAGAATGTGGCCAGGGGAAGGTACTATTACAAAGGATTTATACCAAAATGTTCATAATAGCCAGTGCACACTGGCAG

>21192061

CAACAGTAAAATGGATAAAAGTCATACGGCATTACAAAATGGGTGGGTAACAACTACACAAAACATGGATGCATTTTCACAAATAGCATGGGGCTAAAAANCACCCGCCCAAACACACTCCTACCTCAGTCAATTTTCTGGGCATTATTGTCAAAATTCAATTAACCATAAATTTCAGACTTTATTTATGGACTCTCCACT

>21209529

CCTTCAAGATATTCCTGCCTGACTTCCCTGCCTGTACAAATCAGGCCCAGGTGGACAGACGTGCATGCATGTACACGCTCACATCACACACATGCATGCANCCATCGCCCCAGACCTCCACCCACTGTGGGTGAATTGCTGTCATTCACACAAAGGCCACACCAATGTGAGGGTGCCTACCTGTGAGGGGGTTCCCTCTGA

>21220259

ATCCCATTAAGATACCACAGGACATGTTGGATATGTTTACAAATATCAGGTAAGACAACTGAGTGACTTGCTACCCACAGTCTTTTTTTTTTTTTTTTTTNGAGATAAAGTCTTGCTCTGCCACAAAAGATGGAGTGCAGTGGTGCAATCTCTGCTTACTGAAACCTCCCCCTCCTGGGTTCAAGTGATTCTCCTGCCTCA

>21236257

TCACTTGAACCAGGGAGGTGGAGGTTGGAGTGAGCGGACATTGCACCATTGCATTCCAGCCTGGACAACCAGCGAAACTCCACCTCAAAAAAAAAAAAAANTGCTTTCTAAGGCAATTATTTAGTTGCCTGAGTTCCAAGAGCTGAAGATTGACACCTTCTTTCATATGGTTTTACGATAAAAGCTAGAAAGTTGAATTGC

>21237246

CATTTCAAGTGTAAAGGATATTGCTCAAATCACCGCATGAAACTCTCTCCTCATGTAAGAAAGCCTGAAATCTGATTTCTCTACCAAAAAAAAAAAAAAANTCCAGTTCTTGCAAATGGATACAAAACTACTCATAACCTGCAAAAACCATGAAACCTAAGCATGTTACATCTTAACTGTTATAAGAAAAATAGTTAAAGC

>21250894

GCACATAAACAACACACCTTCCCGTTCCCCAAAATATTAGCGCAGGATAAAAATCTAAGAGTATTTCATAGCAACTGATAGTTTGACCAAAAAAAAAAAANGTTTTCTTTTCCCAAAATAAAGTTCTGTGGCTTCTGTCAGGGAAAGTTTTTTGTTTGCTTATTTGTGGGTTTTTTGTTTAGTTTGGTTTCGTCTTTTGTT

>21251812

GCCCAAGAACATCCCAAGAAATATTGTAAAGCTAGGAAGTATGTACAAACTGTACTCAGGTTTTGTTCTGAAATTTAGTGATTTGTACTTTGTGGCTTGCNACTTCCAAAAACTCATGCAACATGAGTTGACAGTTAGTATTTTAATACAAATAGTTACGATTTTAGGGAGACCAAAAAAAAAAATGTTTTCCTGAGAAGA

>21263666

TCCAGTTGGTGGGGAGGCAGATAAATGTTGAAGTTCCACATAAGAAGAATGTGTTCTATTTCCCCATTGGAAAAACAAACAAACAAACAAACAAACAAACNTTTTGTATCTACTAGGAACAATTTGAGAGAGTGATTGAAAGAGGGGAGAAGAAGGCATCCATTAGTGGTGAGGATGGTGCTGCAGGGAGTCCAGAGGTGA

>21287555

TTCTGGTAATGTAAAACATTATGCTTACCTTACAGTTCCCAAAAACTCATTGGCCAAACCTCTTTTTCTCCTACAGAAGAAAATCTACCTGAAAAAAAAANCAAAAAACAAAACCGGCAACCACAGATGGATATCAGATGAAACCTATTCCCAAGGCCTCCATTAACCTGCCTTGCTGAGGGAGGGAGACTTGGCCCCATC

>21288475

AACACCCATCTTTGTGCACCAAGCAACTTTTTCAGTGTACAATAAGACAATTAAGAGGAACATACCATTCTGGTCCTCTGTTCAGTCTTTTTTTTTTTTTNCTATGTGATTTCAACATCAGGTTAATTGGCAATTGCAGTTAACATAAAGTGCTTCCTTGCCAGTATTAAACTAGGTTTCAAATTTGTCAAGTATTTAAAA

>21292594

TAAACAAGAATTTAGAAAATTTTTAGGATTAGTTGGATACTGTCATCTATAGATAGGCTGTTATGCCCTAGAAACAGAACCTTTATAAAAAAAAAAAAAANGCTCACACAGACAAGTCACACAACCTCATTTGGCAATTACTGGAAATCTGACAGGTGTAAAGGTTAAAACATCTGTTAGTAACTCCTCTTGTCCTAGCTT

>21295251

CTCAGGCATCAACAGGCTCACCCTTGAAATGCGTTATAAGCCATTGGGACCAATTTGAACAGCAAACCCTGAAAAAGGAGCAGCTTTTTTTTTTTTTTTTNCTGCACTATGGCCTGGCCCCAATATTCTCTCTCATGAGGAAAAATGGCCAGTGAGAAAAGTATAAGTTACAATATTATCTTGTAGGTTGAACTTTCCTGT

>21295831

TATATATGTCCTACAGGTTTTAAGGCAAACCTTTGACCTCACTTGTAGAGATGTCATTCTATTATTAGATCAAACACTATCCTTTAATAATAAAAAAAAANGGTGGCTTTAGCTTTAGCCCAAGAGTTTGGAGATGCCTGATATCTTAATCAAGCAAATGATAGAATAACAGCTGAAGAAAGGGACAAATTCCCTAGCAAT

>21298896

CCCATTAGAAATACCTATGGAAGCACTCTTGTTATGGAACTATTCTCTCCAATAGATTAAGCCTCAGTATTCCCTGACTGAAACAGAATGGGATTTTCATNGGGGTATAGTTTCCTACCATGGGGTGATTAACTGCAGAAGAGGTAAACATACTCATACCTAAAACCAGCCAATGGAAAATACTTAAGACCCTCCACAAAA

>21305703

TAAATTTGCCATACTGAGGAATTTTCTGCCTATTTGCTGGTTTTCTTTGTGGCACTGGGTACTTACTCCTAACATAAGTAAATTATTTGTTTGTTTGTTTNAGACAGTGTCTCACTTTGTCACCAAGGTTGGAGTGCAATGGCACAAACACGACTCACTGCAGCCTCGACCTCCCAGGTTCAAGTGACTCTTCTGCCTCTC

>21333042

TCATTAAGTGAAGTACCACTAGGAGGAGGTGATAATGGCTTTGTAAATGCCTCCTTAACTAGTTCAGAGTTTAGTTTAGTTTAGAAATCTAAAAAAAAAANGGAGGGGACTCAAATATCTGTTAGATGACCCTTTTGGAATTGCAGATCAAATTGACCAATTTCTGTGGTCAAGACTGTACATGTGGGCTGACTTAATGTC

>21340311

GAATTCATGTCTTTGTAGGGACATGGATGAAGCTGGAAACCATCATTCTCCACAAACTATTGCAAGGACAAAAAATCAAACATCACATGTTCTCACTCATNGGTCAGAATTGAACAATGAGAACATTTGGACACTGGAAGGGGTACATCACACACAGGGGCCTGTCGTGGGGTGGGGAGAGGAGGGAGAGATAGCATTAAG

>21342140

CACTTGAGTAAAAAATGCCCCACCCCTTGCACAGTCATGGACCATAACTCCAGGATGAATGCCTCTAAACTAACATTCAAAAGGATTTAGTCTGTCTTTTNCTTCTTCCTTTAGCTACCCAAGGACATCTTATAATCAATATAACTTGGTCACCCTCTTCTCAAACAATTACTTTTGATGCTTGTCTTGTCATGCCCTGTG

>21371454

AACCTCCACCTGCCGGGTTCAAGCGATTCTCCTGCCTTAGCATCCCAAGTAGCTGGGATTACAGGCCAGCAACACCAAGCTCACCTAATTTTTATTTTTTNATTTTTATTTTATTGTTTTTGAGACAGAGTCTAGCTGTGTCGCTGAGGCTGGACTACAGTGGCACAATCTCGTCTCACTGCAAGCTCTGCCTCCTGGGTT

>21385511

TGGAAGGACTTGGGACCCAGATGTCTGGTGCATAATGAAAAAAAGTATTGCCCTGGGACATCTTCCAGAGGCCTCTTAGGAAGAACTGCTTCACATCTTTNCTATTTGTCTACATTTTATTTTATTTGTAGGGTGGGGGTCTCACTTTGTTGCCCAGGCTGTTGTTGAACTTTGAGATCAAGTGGTCCTCCTGAGTCAGTC

>21386905

ACACTGTCTTCCACAATGGTTGAACTAATTTACACTCCAGCAACAGTGTAAACACCTTCCTATTTCTCCACATCCTCTCCAGCATCTGTTGTTCTCTAACNTTTTAATGATTGTCATTCTAACCGCTGTGAGATGGTATCACATTGTTTTTTTAATTTGCATTTCTCTAAAGACCCATGATTATGAGCTCTTTTTCATATG

>21426032

CTGAGGTTATGACTTAACCACAAGTATATAAGGTATTTTTGGAGGCAATAAGCAGTTTTTTTAAGATTTAGAATTTACAAATGTAGCTCAAAAAAAAAAANGAAAGTTCAAGATAGCAAGTAAAACACTGTTCATGGAGTGAATACAGTATTTGTACTACCAGTTTACATATAGAGGAAAGCCATGAATCTTACTAGTAAG

>21432058

TTACAGTTACAAGAAAAGTGTCCTTAGGACAAACTGGAAGGGTTTTAACCTTTTAAAGCAGCAAAAATCATCCTAGTTCTTGTTTTTGCATTTTTTTTTTNCTTCTTAGCACTGTCTTCTTATTCTGCTGTCAGTTAAAAGACTAACAAGGCTAATATAAGAATTTATTTCATAGGGACCATCATGTATTGCACTAAAAAG

>21435129

TGAGCCTGTAAAATCAAAAAAGCAACTTAATTACTTCCTAGATAGGATGGAGATATAAGCATTGGGTAAATATACCTCTTCCAAATGAAAAAAAAAAAAANGGCTAAAATAAAGACACTACAGAACCCACACAAGTCCAAAATCCAGCAGGGCAGCCAAATCTTTTTTTTTTTTTTTGAGATGGAGTCTCACTCTTTCGCC

>21435205

TCTTCCAAATGAAAAAAAAAAAAAAGGCTAAAATAAAGACACTACAGAACCCACACAAGTCCAAAATCCAGCAGGGCAGCCAAATCTTTTTTTTTTTTTTNGAGATGGAGTCTCACTCTTTCGCCCAGGCCAGAGTGCAGTGGCGCAATCTCGGCTCACTGCAACTCCGCCCCCCAGGTTCACGCCATTCTCCTGTCTCAG

>21445510

GCTTGCAGAAGTGAATGCCAGCAGCTGTGTCAAAAGAAAAAGGTTACTTGGGGTCCAGACATTTTTAACATGGTGACTCCATATTCAATTTTTTTTTTTTNCATTTTTGTCAACCATGTGTACAGTAAGAAACAGACCACAGGGTGCAGGCCAGGTAGAAACCCCATCTGAGTAATAAAACATTAGGGTGAGATGGCCAGT

>21463544

CATAGAGCAAGTTTCTTGACTTGGAAAAGTTTTATAAATCTCACCCCCCCACAAAAAAAAACAAAAAAACAAACAAACAAAAAAACAAACAAACAAACAANAAACAGCAGAATAATACTGATTACAGAAAAGGCAGGGTTTTTTTTTATTTTTTCTGTACCCATGCCTATTGAAAAGTACTCATACAGTTCTTTCCATTGA

>21479309

AGGTAGATAGCAAAAAAGGTCCCCAGAGGGACCCCAGCCTACAAGTTAGTGCCTCATCCCTACATAACACACAAAGCAGCCTGTTAAAAAAAAAAAAAAANTCAACCCACAGGCACCAATAAAGAAACTAGCACATGTGTTGAGCCTCAAGACATGCCCACAGCTGCACAGATGAAAGAACATCTTCCCCCTTTGAGTAAA

>21490388

CTCCTTTTAATCCAAAAGTGACACCTTCTCTTCCACCTTTGACGCAGGGACTGGCATTGCTTTCAACAACCACTGTGCCAAGCTCATTTTTTTTTTTTTTNGGTATGACAATGAATTTGGATATACAAACAGCCTGATAGACCTTGTGACCTACATGGCCTCCAAGGAGTAAGATTCCCAGACCACCACCTCCAGTGAGAG

>21504261

TGAGCCTTTAGTGTTTTCTAGGTATATGATTATATCATCAATGAACAGCAATAGTTTGAGTTTTTCTTTTTTAATTAGGATGCCCTTTATATATATTTTTNCTTTTGGTCTGATTGCTCTGACTAGGACTTCTAGTACTATGCTGAATAGAAGGAATAAAACTGGACATTTCTGCCTTTGTCTTATTCCAGTTGTCAGGGA

>21512493

CATGTCATTTTTATACCTGTGTAACAAAACTGTATGTTCTGCATGTGTACCACAGAACTTAAAGTTTATATTTTTTAAAACAAGTATGTATTGTTTTAAANAAAGTATATATTACATAAATTATATATTTTTTTAAAAAATAGAATAAAACTGAGGTTTTATGTAGAAGAAAAAACTCTACCTCAGGTCTGTAATAGAGAA

>21541442

ATTGTGTTTATTAATCTCTTAGATGAGTAGTTCACAAATGTTTTCTCCCATTCTGTGTATTGTCTCTTCACTTTGCTTTTTTTGTTGTTGTTTTTTTTTTNAGTGCAGGAGGTTTTAAAATTGGTGATCCCACATACACATTTAAGCTTTGGTTATTAGTGCTTGTATAATATTACTTTAAAACTATTTTTGCCTAGCTCA

>21546798

TAGCTGGTTATTTTACACACTAGTTGATGCTGTTTCTTCACAATATTATTGGTCTTTATATTTTTGTGTGTTTTGCAGTGACTGGTGCCATATTTTTTTTNCTGTATTTCATGCTTTGTTCAGGAGCCCCTGCAAGGCAGTCCTGAAGGTGCTGAATCCCCACAATAGTTGCTTGTCTGAAAAGAATTGTATTTTTCTTTT

>21555253

ATGATCATTCTGGAGCAGGTTATTTAATTTCTATGTATTTACAAGGCTTTGAAGGTTCCTTGGAACCTTCAAAGGTTTCTTTTTTCTTTTTTTTTTTTTTNAGACTGAGTTTCACTCTTGTTGCCCAGGCTGAAGTGCAATGGTGTGATCTCAGCTCACTGCAACCTCTGTCTCCTGGGTTCACATAACTCTCCTTCCTCA

>21558710

TATTGAAATAAGAGTTCACAGTGCAGGTCTCCACCTGCTGCCCTATCTGTCCCAGCTGGAGCTGCAGTTTAGTCCTGCCTCCTGTCTACCATTTTTTTTTNCTGATGTCTTCCAAAAAAAAAAAAAAAAGGCCCTTCCTTTATTAATGTTTGTTATTCTTTGAATCATTTTATGTTTATTATTTTTTATTTGATTTTTGTT

>21560202

ATCTTTCTTTGTTTCTCTTTATGTTTTATCATACTATTTCTTGGTGTGTTGCTGTAGTTATTATTTTTGATTGGTTTATTATTTAGGTTTTCTACTAAAGNTATGAATAGTGTACATACAAAAATTACAGTGTTTGAATGTTCTGTATTTTTTGAGTGCTTACTATTATCAATAAATCTCACACATTTAGATAATTTCTCT

>21562338

AATATGACTAATCACATACCCAGAACTAAAATGTGATTATCTCCATAAATGCAAAATAACCTTTCATTAAAATCAACCCCTCTTTTTGTATTAAAAAAAANCTCACAATAAACTAGGTATTAAAGAAATATATCTCAAAATAATAAGACCTCATAGTAAGACAAACCCATGGCCAACCTCATCCTCAACTGGCAAAAGCTG

>21562963

CAAAAGAACAAGGGAGAACATCAACAAATGGAGTATATTCCGTGTTCATGGATAGAAAAACAAAATCAGTTTTTGTGTGTGTGTGTTTTTTTTTTTTTTTNGAGATGGAGTCTCACTCTGTCAACAGGCTGGAGTGCACTGGCACAGTCTCGTCTCACTGCAACCTGTGCCTCCTGTGTTCAAGTGATTCTCCTGCCACAG

>21572242

TAGAAGAAAACCTAGAAAATACTATAATGCATATCAGCCCTAGTAAATACTTCATGATGCAGACTCTGAAAACAATTGCAATAAACGAAAAAAAAAAAAANTGGCAAGTTTGTCCAACTAAACAGCTTCTGCACCATAAAATAAATGGAGTAAACAGCGTGCAGGATGCAAAAATATATTTGCAAACTATGCATCCAGCAA

>21586876

CACTGGGTTCACCATTCCAGAATAAAGCTGTGTCCATCGGACAGCCAGCCTAATCCCTCCTCTTCCTCCTGGAAGTCACAAGTACTCTCCCCTACTTCCCNTTAAACTCACTTGTATTTCTGAAGAACAGTAATAAACCTAATGAGCTTAATACATCCCTTCATTAAATTAGGTCTGTTCATTCTTACCCTACTTTTTGCA

>21599263

AATAAATGGTGCAGAGACACAAAAAGGCTCAAAATAAAGGGATGGAGGAAGATCTCCCAAGCAAATGAAAAGCAAAAAAAAAGAAAAAAGAAAAAAAAAANCAGCAGATGCAGTACTAGTCTCTGATGAAACAGACTTTAAACCAATAAAGATCAAAAGAGACAAAGAAGGCCATTACACCATGGTAAAGGGATCAACTCA

>21603457

GGGACTCCTGACAAATTTATTGCAAAAGGATCACCAAGGAATTTAGTCTTAAGGATATTTAAATCCAACAACAGGTAATTTCCAAAAGAAAAAAAAAAAANTCAGAGTAACTGCCGGCTTCTCAGCAGGAAACTTATAGCAAGAAGGGACTGGGGTCTTATGTTCAACTTCCTTAAAAAGAAAAACTATCAGCCAAGAATT

>21617811

AGAGGCTGCAGTGAGTTCTGACTGTGCCTCTGCACTCCAGCCTGGATAACAGTGAGACATTGCCTCAAAAAAAAAAAAAAAGAAAGAAAGAAAGAAAGAANAGAAAAAAGGAGAAGAAGAAGGAGGAGGAGGAAAATAAATTAAAGTTTCTTCATTAGAAGATCATAAAATATTTGAGATTGGTTCATAGAAACTAATTTA

>21652420

AGGAATACCAAAGTCAACCTAACACTAGTAGAGAGAAGAATAAATGAAAATTAGAGCAGAAATAAAGGAAACAGAAAATAGAAAAACAATACAAAAAAAANTAAACCAAACTAACAGGTGGCGATTGTTTTGAACACATCAAGAAAACTGACAAAACTTTAGGTAGATATTTTTAAAAAGGGAATAGATTCAAGTAACTAA

>21690934

CAAAAATGAAAAAGAAAGGAAGTTCTTACCACACAAGCAAAAACTGAGGGGATACATCAATACTAGATTGTTCTACAAAAAAAAAAAAAATGCTTAAAAANGATGTAAGTGTGGAGGTGAAAAGACAATACATACCATCATGAAAACAGGCAAAATTATAAAGCTCACTAATAAAAAATTAAAAGACAAATGAAAAAGAGA

>21706386

ACATGTTTTATTGTCTCCTTTAAGTGGGTAACCAAATATTGTTTCTCAGACACCAATGGTCCTATCTTAATGAAATGTTCACATACCCTTTGAGCTTTTTNCCCCTTTCCAAGTCAGATTAATTATAAAATGGAATAAAATAAAACTTTCGGGGTATATTTTATACCTAAAATGATTTTTGAGATTTTGACTCTTAGAAAA

>21732677

AAGTCTAAAACCTAGGCTTCCTCCAGAGTGTTTTCTTTTATTTTTTTTTATTTCTGTTCATTGCCCATACTTTCCTGTTTTTTTTCCTTTTTTTTTTTTTNGCATGACTTACAATTTTTTTTGAAACCGAAGGCTTTGAATATTACCATATGGTAACTGTCAAATTCAGATTTAGACATTAAAGAGATTATTCTAGTAGAG

>21733168

TTGGCCTTGTCTTGAAGTGGTATTGGGGAATACCTGGTCATAACACTGGAAATCAGATTCTGTCTACTCACCAGAGTTTGTGGTTGCTGGTTGTTACGGGNTTTTTTTAAGTGAATTTTGGGGTTTGTTAAGTGGCCAAACTATTTTTGTGAAGACTGTTGTATGTGGGTTTCAGATGTCTCTACATCAGTTTGTGGTCAG

>21751916

TTTCCGAAGGAATTCTGCAGATTCAAGCTCTAACCATTCTTGATTAAAATTGTGAGTTAGATAAGATTGTTTAGTAAAATTGTACTATGGCTCAGGAAATNTTTATTTAATATCTACTGTATGCCAAGCATTGTTCTTTTTTCCATCTTCCAGGGAAATTCACCTCTTCTATAGAAGAGTTTGTTTTGAACTATACGATTT

>21807996

TTGCAGATAGCTGCCATTGTTAAATATTATACAAAGTTCTGGAATTCCATGTATGGGGATATTTGGGAAAGACCATGCATTATTTATTACCTGATAATGANGTTGTCAAGTGGCAACATTTTTGCCCGGGTAGTTATTCCCATTGGGAATTCCACCCAGGAGGTCTGCCTAGATTGTTAAATTTTTTCCATGGTCTTTCCC

>21825114

GGTTGATTGGTGCAGCCAATGACCATGGCACGTGTGTGTAACAAAACTGCACGTTCTGCACACGTACATCAGGACTTAGCAACGACAAAAAAAAAAAAAANCTGCCAAAAAAAATACAGAAATAGTAGAGTCAGAGATTGCTATTATTTTTTCATCCATATGTTTGTAGGGTTATAGTTTTATTGCCACAACTGTCAGGAA

>21836753

TTTTAAATTTTTTGAGGAAACTCTATACTGTTTTCTATAATGGCTGCACAGTTTACATCCCTACCAACAGCGTATGAGGGTTCTCCTTTTTTTTTTTTTTNATGTGTTAGAGTCCCATAAAGGGCTTAGAATGCAGATCCCTGACATGTGCAATTAATAGGGTTTATGCTCCTTTGAGAATCAAATGCCGCTGCTGATCCC

>21838833

TATTTATCATAAAAAAACTATTTTCTGGCTCATTTTCTCTAGCACCTGTACATCATTTATAGCATAGGCTATCTACTTATCTTCCTGACATTTTTTTTTTNCCCAAATAGCCACATAGGCCTTGTCTCAGAGGAAAAATGGTTAGAACTTTCCTGACCTGTTACCAATCACACTCTAGTAAGAAACAAAGATGCTGGAAGT

>21838991

TGTTACCAATCACACTCTAGTAAGAAACAAAGATGCTGGAAGTATGGACAATTTTCATCAGCATTACTTGATGTCACTCAGAAAAAAAAAAAAAAAAAAANCTCTCAATCTTCCTAGGAACTACCTGGCAAGGTGCAATAACCTGGTAGGTATGGGGATTAAATGAGCTCCATGTCTGTTAGAAACTAAGATATAAACCAC

>21845596

ATAACAGCAGAACCACAGGATGCTGTTCAGGACTGGGAGGAAAAAACAAAGGCAACACTAGATAGGGCTGGCACTCAGAAAAACAAAAACAAACAAACAANAACCAAAAAAAAACAGTAGTTATGGCTTGGATGGGGATAAGATGCAATTTTACCATATGTATTTAATTCAGAGGTAGCAAAAGCATATGCTTAACAGATG

>21846278

AGTTGAGTAGTCCCCACAGTTATAACTCAAAAGTCTTTCAAAGGTCATATGTATTCAAAGTCCTATGTATCACATAGGGCTTCATTTAATCTCTTCCTTCNAAATACTGTACAGCAATCACACACTCACACATACACAAACACACACACTGGATGAAAAATGTCAAATGTGCTGCAGAGGGAGTTATTTTGTTATTAGATG

>21848033

GTCTTTAATCCATCTTGAATTAATTTTTTATAAGGTGTAAGAAAGGGGTCCAGTTTCACTTTTCTGCATATAGCTAACCAGTTTTCCCAACGACATTTATNAAATAGGAAATTCGTTCCCCATTGCTTGTTTTTGTCAAGTTTTTCAAATATCAGATGGCTGTAGATGTGTGGCATTATTTCTGAGGCCTCTGTTCTGTTA

>21853789

AAAAAAAAAAAAAAAAAAAAAAAAAAAAAAAAGTGTATTAAGGAAAGAATGCGTGAGTACAATTTAAAAATTAAGAAACAGATTTTTTTTAAAAAAAAAANCCAGGACCCCTACAGCTACATAAATGCAAAGAAATAATTTTAAATATTTACAATTTAATATTAGATTTAAAATTTCAATAGTTACAACAGCATAGCTGAT

>21857717

AAGGAATAGAAGACATTCAGGTAGAAAAGGAAAAATTAAAATAGTCTCTGTCAATGACATAATCTGGTGTACAGAAATCCCTAAGGCCTCCACTAAACAANTGTTGGAACTGATAAGTGAATGCAGTAAAGTTGCAGCGTTCAAAATCTATACATAAAAATCAGCAGCATTTTTGCACAGTAATAATTATTTTTTTAAAAA

>21863980

TCTCACAAGTGGCGGGTGAATGGTAAGAACACATGGGTGGGGACAGGGGAATAACACACATGGGGACCTGTCAGTGCAAGGGGTTCCGGCATCAGGGAGGNAGAGCATCAGGAGGAATTAATGCATGCAGGCCTTAATACCCAGGTGATGGAACGATGTGTGCTGCAAACCGCCATGGCACATGTTTACCTATGTAACAAA

>21905370

TCAAGATTAACTGCAAAAAAAAAAAAAAAAGGAAAAACCCTGCAAATCCAAAACTCTCCTTGATATGTGTCCTTCGTAACAGACGAAAAAAAAAAAAAAANCCTCTATAATCCCAAGGCTAGAAAGCGACTCGACTTCCAAGGAATGACGCACATCTGAACAAACACTATGCTATTTGGGTTATGAGTCCTTACTAAAATG

>21907538

TTTCAAAACAAGATGTTACACTTTATTTCCTATAATTTTATTTACAATATTTTACACCCGTTAAGCAAAAATCCCCCTACATTGCTATTCTGTTTTTTTTNAATCAGTTCACTACTGTAGTATCTTTTTGTTCTCCATATATTTTTGAAAAATACGCAAAAGGTAAGTTTTAAAAATCAAATGGTAGATTTTATTTGGAAG

>21907722

TAGATTTTATTTGGAAGGGCACTGCCAGAAGTGCCTTAAAGTTTGATAGTTTGACAATTGTTTCGTATTGTACGATTCTTGGCATTTCCGTTTTTTTTTTNAACAATTTATCCATTTCATCTAGATTATCGGCTTCATGAGTTTATTATACTACATTACATATATATTCCTGTTTCAAAAGTTGTTACTTAATTTTCTGCT

>21919884

TTGTCTGTTTACTCTGTTTACAGTTTCTTTTGCTATACAGAAGCTTTTCAGTTAAATTAGGTCTGACTTATCAATTTTTGTGTTTGTTGCAATTTTTTTTNGGAATCTTTGTCATAAAGTATTTTCCAGGGCCTATGTACAGAATGATACTCTCTAGGTTTTCTACTAGGGTTTTTAAATTTTTAGGCTTATAGTGAAATC

>21932080

ACTCAGAAAAAATAAAGCCTAAAGAAAAATAAAACCTTTGAGAAATAAGCGATTATGTAAGGAGACCAAATCTATGCCTCATTGACATTCCTGAAAAACANGGAGAGACAGCAACAACTTAGATAATATATTTCATTATAACAAGATGAAATTTTTTTTTGAACCCACTAGTTAGGTCAAAATTCAAATTCAGGAAATGCA

>21940229

GTAACAGAAAAAAGCAGAATGACAGTCCTAGTTCCTTATAAAGCAGACTTCATACCAACAAAGATCAAAAAAGGAAAGGACATTTCATAATGTCAAAGGGNTCAGTTCAACAAGAAGAGCTAACTCTCCTAAATATATATGCACCCAACACAGGAACACCCATATCTATAAAGCAAGATCTTAGAGACCTTCAAAGAGACT

>21946444

GGAAGTTTATGAATATTAAATGTCTACACGAAGAAGATACATCTGAAATTTCCAACATTACCTTGCATGTAAAGAACCTAGAAAATCAAGAAAAAAAAAANCTATACCCAAAGCTGCAGGAAAAAAAAAAAAAAAGAATCAGAGCATAATTAAATGAAATTGAAACCCCTGGAAGCCATAAATGGGATAAATAAGATCAAT

>21946960

TTTTTTCAGAGATACTAAAAAGCTGGTAGAAATACTACTGAAACTATTCAAAAATAAAAAATAAAATAAAAAGGAAAGAATAATAATTTTTTTTTTTTTTNGAGACAGATTCTGGCTCTGTAGCCTAGACTGGCTCTGTAGCCCAGACTGGCTCTGTAGTCCAGACAATGGCACGACCTCTGCTCACTGCAACCTCCGCCT

>21962595

AAAAACCACAATTAGATTTTTCCTCAGTTCATTTAGAATGCATGTTATCAAAGAATAAAAGATAAGAAGTGCTGGTAAGAATGTGGGAAGAAAAAACACANGTTATTGGTAGGTAAATTAGTACAACGATTTTGGAAAATAATACAAACATATCCAAAAAGTTAAAAACAGAAATAGTTAACAAACCTGCAGTTACTCTAC

>21965793

GCTGTAAACATTCTCACATGCAGAGACACACATAGGCTCAAAATAAAGGGATGTAGGAAGATCAACCAAACAAATGGAAGACAAAAAAAAAAAAAAAAAANGCAGGGGTTGCAATCCTGTCTTTGATAAAACAGACTTTAAACAAACAAAGATGAAAAGAGACAAAGAAAGCCATTACATAATGGTAAAGGGATCAATTCA

>21968849

TGCAAATCAAAACCACAATGAGATACCATCTCGCACCAGTTAGAATGGCAATCATTAAAACGTCAGGGAACAACAGGTGCTGGAGAGGATGTGGAGAAATNGGAATGCTTTTACACTGTTAGTGAGACTGTAAACTAGTTCAACTATTGTGGAAGACAGTGCAGTGATTCCTCAAGGATCTAGAACTAGAAATACCATTTG

>21986627

CTCATGGATAAGAAGAAATAATATTATTAAAATGGCTACTTTGTCCAAAACAATTTACAGATTAAATGCTATTTCTATCAAACTATCAATGACTTTTTTTNACAGAACTAGAAAAAAATATTTAAAAAATTTATTTAGAACTAAAAAAGAGCCAAAATAACCAAGACAATTCTAAGTACAAAGACAAAATTAGAGGCATCA

>21989324

AGGATATGTAAAAAGTTGAATCCTTGCATACTGCTGGTGGCAATGTAAATTAGCACAGCTATTATAAAAAACAGTTTACAAATTCTTCAGAAATTTTAAANTAGAACTACCATAGTATCCAACAATCTCACCACTGGGTATACATTTATGGGAAATAATATTAGTGTGTTGAAATACCTGCACTTTCATATTTATTGCAGA

>21990964

TTATGAATCTGGTGTGGGTCACAGAGATCACATGCTTCACAAGGTAATAATATATCACAAAGCAAATGGAGGCAGGGTGAGATCACAGGACCACAGGACCNGGGTGAAATTAAAATTGCTAATGAAGTTTCGGGAATGCATTTTCATTGATAACATCTTATCAGGAGACAGGGTTTGAGAGCAGACAACCGATCTGACCAA

>21996246

CCACAAAAGGCCCCAGTGTGTGACGTTCCCCTTCCTGTGTCCATTTGTTCTCATTGTTCAATTCCCAACTATGAGTGGGAATATGTGGTGTTTGGTTTTTNGTCCTTGTGATAGTTTACTGAGAATGACGGTTTCCAGCTTCAGCCAAGTCTCTACAAAGGATATGAACTCATCATTTTTTATGGCTTCATAGTATTCCAT

>22039535

CTTCAAGAACTAGAAGAACTAGAGCAAACCAAACAATAAAAACAATTGATTCTTTAAAACATGAACAAATATGATAACTGTTTACCTGGACTAAGAAAAANTAAAAAATACTCAAATAAAATGAAAAAATTAAGAAAAAGACATCTAATACCACAGAAATTTTAAAAAATTTCTTTGAATTTCAACAAGATATGCTGAATT

>22048536

TTGGGAGACCGAGGTGTGTGCATCATGAGGTCAGGAGATAGAGACCATCCTGGCTAACACAGTGAAACAACGTCTCTACTAAAAATACAAAAAAAAAAAANCAACCAAATTAGCTGGGTGTGGCGGCAGGCGCCTGTAGTCCCATCTACTCAGGAGGCTGAGGCAGGAGAATAGGATGAACCTGGGAGGTACAGCTTGCAG

>22069015

ACCAGACACACCAACCTAAGGAACAAAATAGAGACCACAGAAGTAAGCCCAGACAACTACAACAATCTGATTATTGACAGAGCTGACAAAAAAAAAAAAANTGAAGAAAGGACTCCTTATTCAACAAAAGGTGCTGAAATAACTGGCTAGCCAATAAAAATGATTGAAACTAGACTCCTTCTTTATATCACATACAAAAAT

>22087303

AATTTCTTATTGACTTATGCATATAGCACCACTGCTTCACAGCTTGACTCAATTGCAGCTGGCAGTCAGGCCTACACGCTATAGAAACAAAGCCTTTTTTNCTGTGAAAGATAAAAAGTAATAGCTTGAATACAATAGCAGGCTTATTGTTTTTGGCAATAAATATATATTTTAATGAGTTTAAGTCACATTCCATAAATA

>22106768

TTTCTGATGTTCTTTATTTGGCTTTTCTTTTTCCTTTTGGTTTGTCTAGCTAGACATTTATCAATTTTCTTTATATTTTCAAATTACGTTTTGTTTCAATNTTTTTTTGGTCTCTTTAATTTTAGCTCTACTAAGATTATTTTTATTGCTTTATTCTGCTACATTTGGATTTTTTGTTCATGCTTTCTAGTTCCTTGAGGA

>22145830

TTTCATGAAACAATTTTGTAAAATATAGAAATGCCAGAAAAGCAATTTTGATAGTTATAACCAAATAACTGAAATACATATTGTTTGACAGTTTAACTTANTAAAGGATGTAGCTGAAAAGACATTGTTTGCTAGTATAGATATTAATAATATCTATCAATTTAATTACTAAATCCCTAGAAGGAAAATAGTGTTAGAAAT

>22146201

TGAACAGTTTGGGAGGCTGAGGAAGGAAGATTCCTTGAGGCTAGGATTTAAAGAGTAGTCTGGGTAACATAGTGAGGCCAACCTCTGGTTTTTTTTTTTTNAATTATTATTATACTTTAAGTTCTGGTGTACATGTGCAGAATGTGCAGTTTTGTTACTAGGTATACATGTGCTCTGGTGGTTTGCTGCACCCATCAACCT

>22159319

GAGTTTTACAATTTAAATATACTAAAGCCAGTGAAAGACACACTTAGAAATGAAAAAATGATAAGTTTGACACTATTTGCATTGTACCACAATTTAAAAANGTAAAGTTACTCATAGGTACAATAATAAAATAGACCAATAATAAAGGCCTAAAAATATATGAGAAAATTTATTATGTTGAAAGTATCAGTTCAGTTAATA

>22178503

GGATACAAGCCAGGACATTTCTGTGAAGGGAAGAACAAACCCTGGTTGAGTACTTTCTCCTCTGAAATGAAAGCAGAATAGACATCTTTTTTTTTTTTTTNGAGCAGAACTCTAGTTTTGAAAGGATGAACCCAAATGTCTCAAGGACTAACAGGTGCTGGTCAGAGTACCCAGTTACTGTAAGCTAATATCCCATGGTGT

>22190644

ATCCATCCCACAAAGGACTGATACATAGAGTCTATAAGAAAATAAGAAAAATGTGGGCAAAGGATATAAGGAGACACTTCTCAAAAAATATATATATATANGCAGCCAACAAACATGAAAAAAAATTAAAAAGCTCAACATCCCTAATCATCAGAGAGAAGTAAATGAGACCCATAATGAGATACCATTTCCTGCTAGTTA

>22208211

ATGGATGGTTGGACAACCCACATGGATTTGACATCTGTGTAATCATATCTAAGAGGATAACTTGTTTTGTAGTTTGACCACTTTCTTGATTTTTTTTTTTNGTTTACTTAGGTACCTAGAATGTTCTCATGTTTTTCTTTTAACTCTGTTGAGCATTTTAAAGATAGTTACAACTTTCTGAGAAGTTGAGCTTTTCAAATT

>22208881

ACTTTGGCCGAGGCCGATGCAGGTGGATCAGGAGGTCAGGAAATTGTTACCATCCTGGTTAACACGGTGAAACCTCCTGTCTACTACAAAAAAAAAAAAANTACAAAAAATTAGCCGGGCAGATGGCAGGCACCTGTAGTCCTAGCTACTTGGGAGGCTGAAGCAGGAGAATGGCATGAACCCGGGAGGTGAAGCATGCAG

>22517423

AAACCCCAAACCTAGGCAATACCATTCAGAATATAGGCATGGGAAAAGCCTTCATATCTAAAACAGCAAAAGCAATTGCAACAACAACAAAAAAAAAAAANCAGAATTGTCAAAGTGGATCTAATTAAACTAAAAGTCTTCTGCTCAGGAAAAGAAATTATCATCAGACTGAACAGGCATCCTACAACATGGGAGAAAGTT

>22529059

TATCTAAAATAAAAATTTAAAAATAATTACATATTAGTGATGAATAATTTACATTATAGTATTGCTTTAAGAGAAGAATTCTAAAAAACAAAGAAATGAANGAAAAACATTGAAAATACACTACCAGTAAAACTGAAAGAAATCGATTAAGAATTTAGGGTAAAATTATGAAATCTAAAGCTAATTATCTTAATTTTCTTT

>22535904

AGTGGGTGTATCGCACCAGCATGGCACATGTATACATATGTAACTAACCTGCACAATGTGCACATGTACCCTAAAACTTAAAGTATAATAAAAAAAAAAANTGAAGAGATATAAAGTCAACTGAAAAGAAATAACAGAAATAATGTCAAACTACGTAAAATTAAAAACTAAAAGGGAAATAAAAAAGTAACTAAATAAAAT

>22548354

GGGATATAATCTCTTGGTGTGCCGTTTTTTACACCCATTGGAAAAGCACTATATTAAGGTGGTAGTGTCCTGATTTTCCAGTTGCCATCTGTCACACCTTNCTTTGACTAGGAAAGGGAACTCCCTGATCCCTTGCACTTCTCAAGAGAGGCAATGCCTCACCCTGCTTCGGCTGGTGCACGGTGCACTGCACCCACTGTC

>22568341

GTATTAAAATTATTGCTTCCCTGAAGAGGCCAGGCCTCCTTTCCATAAGATGGCTGAGTCCCTCTGAAATAGAACATAAGCTGTGTGTTTTTTTTTTTTTNCTTCAGGGTCTGAGGGAAAAAAGAGTTAAAGAAGAATGCACTCAAGGGAAGTGTAGTCTTCAAATTGTGTGTTACCCATCTTGAAAAGTGAAGAGAAAAG

>22598262

TCTACTGATTCAGTGTAATCTCTATCAAAATACCAGTAACATTTTTCACAGAAATTAGAAAAAAAACACTTTTAAAATTATATGGAATTACAAAAAAAAANGAAAAAGAAAATATGAACAACTAAAGCTGTTTTAACAAAAACAAAAACAAAAAGAACAAAAAAAACCTGATGTCAAATTATACTAAAAAGCCATAATAAC

>22620495

GTTTTCCCAACACCATTTATTAAACAGGGAATCCTTTCCCCCATTTCATGTTTTTATCAGTTTTGTCAAAGATCAGATGGTTGTAGATGTGTAGTATTATNTCTGAGGGCTCTTTCCTGTTCCATTGGTCTGTATGTCTGTTTTGGTACCAGTACCATGCTGTTTTCGTTTCTGTAGCCTTGCAGAATAGTTTGAAGTCAG

>22625019

GCTCTGTGGGCATGGGACCCTCTGATTCAGGTGCGTGATATAATCTCCTGGTATGTCATTTGCTAAGACCATTGGAAAAGTGCAGTATTATGGGGGGGGGNTGACCCAATTATCCAGGTGCTGTCTGTTACCCTTTCCCTTGACTGGGAAAGGGAATTCCCTGACCCCTTGCACTTCTCGGTGAGGTGATGCCTCGCCCTG

>22630469

AGATAAAAAAAATCCCCTTTCTATTTAGATGCCATTCTTGTTGTAGGCAGTATAGGTGTCTCAAGAGGACATAAGTGTCAAATGATGGTCTTCCTGCTAANGCAGAGAGTATTAAGACTAAAATTTCGTTTTGGAAGATATGTTACTCTTTACTGCTAAAAAGAGGACTAAAAGGCTTTTGGCAAAGGGCAGACAAGATTC

>22652506

TTATTGAAACTTTTTAAATTCTCATCCCAGAGTTACTAGTATTTAAATTAGATAATAATTATTTACTGTAGGTTTTCCTATATTATATTTTTTCCAAAAANTATTATAATTTCATGTTTTTTTATCATTGATTTGTTTCAAACAGTAAAACTGGTTAGGAAATTATTGTAAAGATATTCACAAGGAGATGAACATGCACAA

>22657399

GGGTTTCACTGTGTTAGCCAGGATGGTCTTGATCTCCTGACCTCGTGATTCAGCCACCTTGGCTTCCCAAAGTGCTGGGATTACAGGTGTGAGCCACCCCNCCTGGCCAACATCCAAGTATTCTTAAGTAACCATAATTACTACACTTTAGTCATTCAATTTTTTAGGTGTGTAATCTTGCAAATTATTGCACAGTAGTTG

>22698942

AGTCATTCAGTAAATGATAAATTATTATAAATATATAGATAGTCTAGAAATACTAACACAATATTTTTAAAATCATATGTCAATAGTCTTTTTTTTTTTTNGAGAAGGAGTCTCTCTGTCACCAGGCTAGAGTGCAGTGGCACAAACTCGGTTCATTGCAACCTCTGCCTCCCGGGTTCAAGAGATTCTCCTGCCTGAGCC

>22710517

ACCATGACAGAAATATTAGGAACCGATATTTCAAAAAGGACATATCACCAAACTAAAATAGTCCTGTGGCTATTGCATGTCCTAGTTCTGTTTTTTTTTTNAACATTAAATCAAATTGTCACATGTATGTCCTTTTCAGTTTTCTGTTTTAGTTAAATTTTCATATGATAGCATAAGGATAAGTAATCTTTAGTTTTGCTG

>22739395

TAAAATATAATTTAAAGTGGATTCTGTTACATGGTATCACAATAGAAGGGGAATGATCAGGGTTTGGTTAATCCTGGTAAATTGAAAACAATTTTTTTTTNATCATATGTGCCTCAGAAGGCACACAAAAGAAGTATAGTGGCCGGGCGCGGTGGCTCACGCGTGTAATCCCAGCACCTTGGAGGCCAAGGCGGGTGGATC

>22745184

CAGATTTTTAATTAAAATAATAAAAACTTATTTTTGGCTGAGCTCTGTGGAAGTATTAGCCAGCATACACCTGTAGTCCCAGCTACTGAGGAGGCTGAGCNAGGAGTTCAAGGTTCCCATGAGCTAAAAATTGTGCTAATGCTCTCCAGTCTGGGTGATAGAGCGAATCTCTATCTCAAAAAGAAAAAAAAAAAAATCTTT

>22745279

TGAGCCAGGAGTTCAAGGTTCCCATGAGCTAAAAATTGTGCTAATGCTCTCCAGTCTGGGTGATAGAGCGAATCTCTATCTCAAAAAGAAAAAAAAAAAANTCTTTCTGGTATGTTAACATTCTTTCTTTTCCAAATTAGTGGCATTTTAGGGATTCTCTTAGTCCATTTGGGCTGTCACTGACTGGGTAGATTATAAAAA

>22752948

GAAGAAAATAAACTGAGTCCTTAATTGTATTGTATATATGCATTTATAAATTTTTACAACATAAAGTACTCTATATTTACAAAATTTTTTAGTTTTTTTTNCTTTGGAATTGTTTCTGAGTAGTACTTAGTAACACTACTCTAATGTAATATAAATTTTAAAGTATACCCAAAAAGAAAATGAAAAGAGATGAAAAATGCA

>22768365

TGCAGCAAACCAACAAGGCACGTGTATACCTGTGTAACAAACCTGCACATTGTGCACATGTACCCTGGAACTTAAAGTATAATTAAAAAAAAAAAAAAAANTAGAAATCCTTGTCTTGTTGCAGTTCTTAAAGAAAATACTGCAAGCTTTTGCCTTGAGGATGTTGCTTGTTACTATTTTGAGGTATGTTCCTTTAATACC

>22771350

CTTTTTGAGTGCTATAGTTTACATGCTAGTTCTTTATCATCTGTGTGGACTGATACTTCTTCAATATTTGAAGTTGTTGTTATTTGGGTGCTTTTTTTTTNCATTTCTTTTTCCATGCAAACCACCATGGCAAGTGTATACCTATGTAACAAACCTGCACATACTGCATATGTACCCCAGAACTTAAAGTTTTACAATAAA

>22776665

CTTATCTCAAATTCCTTCTATATAACAAAGTTCCATCAAAGCTGATTTATTTATTATTTTTTTAATTCTGCCCTCAGAATCTTAATTGTAAAAAAAAAAANTTCTACAGATATCTGCACATGAAATGGTAATTCACTGATGAATTTTTATTACTTTTTTATTAAAAGGTAATTCACTAAAGAATTTTTTTATCATTATTAT

>22803995

ACTCTGTCCATCCAACTGGGAGCTGCAATCTAGTCCTGCCTCCTGTTCACCATCAAGGAGATGCTTCTTTGAAGGATGTTTTAAATTAAATATATATATANTTTTTTTTTATTTGGAGTCTCACTCCGTTGCCTAGGCAGTGGCACGATCTCGGCTCACTGCAAGCTCCATCTCCTCAGTTCACACCATTCTCCTGCCTTA

>22815308

ATTTTACTGATATATTCTCAGGAATCAGAGATTAATTCAACAAGATATTAAATAAAATACATAATATTTATTCTTTTCTACTTATCACAATCTTTTCCCCNTTCTTTCTATGTCTCTTATCAAAACTTCTGACTTAAGCTTCTCAAACTCTGCTTTTAATATCTCAAATGTTCTAAATGTAAAAGTTTTATAGAGAGGACT

>22838681

GCTGTATTCAGGAGACCCACCTCACGTGCAGAGACACATAGGCTCAAAATAAAGGAATGGAGGAAGATCTACCAAACAAATGGAAAACAGAAAAAAAAAANGCAGAGGTTGCAATCCTAATCTCTGATAAAACAGACTCTAAACCAAAAAAGATCACAAGAGACAAAGAAGGCCATTACATAATGGCAAAGGGATCAATTC

>22845022

TAAGGTTCATAAAGTGGAATTTATAAAAGTAATTTTGTGTGTGATTAAGCTAACTATACCTAAAAGGAAATTGTTTATAACAGTCTCTCTTAAAAAAAAANGTTATATGTGTTAAAACCAAACTTTCTTGACATTAATTTTCTAAATTGCCAATTTTACTTTTCAATCTTTTAATCTATTTCTTTTTTAAAAAAATTGTCA

>22859636

CCTGTGCTGTGGACATGGCACCAGAGAATGCAGGCCCCACCCAAGGGAGGCAAACATCTCTGAGCCATGTAACCTGCTCACACCTCCATCCAACAACAACNGCAGTATCTGACCCTGGCACACACAAAGGCATCCAGTCTCTTTGCTCTCTGCTCAGACTGGTGGTGGGAGCAGTGTTACAGCTGGCAGCCCTAGGGCACA

>22864089

TTCCATTTGGTAAGAAGCAGTGTTTGTGTTATTACTCTCCTGGCTCCAGGTGGCTTATGAGAGGGAAGGACACACAGACACACACACACACACACACACANCATTTGTTTGGTAAAAAGCAAGAGAGGAGAACAAGAGTCTCTGCCTGGAAATCCAGAGAATTCTTCTGTGTCCTGTCTGAGACAATCAGGTGTTACCTCC

>22885884

ACTAATAACCTAACCCTTTCTGGCACATTGTATATAGAGGATTACATGTTAACTAGAATTTTTATCCTTAGTAACATAAAACTTTAGTGAAACCCTAAAANGCAAGAAATCTTGAACTATCAGATATGGGCATTAATAGATAAGAACAATTCCACAATTTTAGAAATATATTATCTCCCTATTACAACCTTTTTTTAATGG

>22896236

ACATGAGGTTCACTTGAGTCCAAGAGTTCAAGACCTGCCTGGGCAACATAGCAAGACCCTATCTCAACCAAAATTACAAGAAAAGAAAGGAAAAAAAAAANGAAAAGAAAAGGAAAGAAAAGAAAAGGGAAAAGGAAATGGAAAGGGAGAGGAAGAGGAGGGGAGGGGAGAAGAGGGGAAGGGAGGGGAAGGGAGGGAGCA

>22903876

ATTCCTGTTGCTTGAAGAATGTGTGTGTGTGTGTTTGTGTATATATGTGTGTGTGTGTATATATATATATACATAGAGAGAGAGAGAGAGAGAGAGAGAGNAGCGGGGGAAGGTGTCTCACCTTGTTGCCCAGGCTGGTTTCCAACTCCCGGCCTCAAAGGAGCCTCCCACCTCACCTTTCAAAGCACCAAGATTGCAGAT

>22917699

GAAAAACGAATTGTTTCTTAAATCATGATTTTACAATACAACATGTCACAGTCACAAGGAATCATACAGGTTATTTCTTAACGATTGGCTTTTTTTTTTTNAAGGCGGCTAAATCCTGCTCCTTCAGAGCTTCTGTTAAATATTTTTAAAGTTGGCGAAAGATAATTTTTAGAGTGTAAACTGCGTCCTCCCAGCTTAGCC

>22918092

CCGCAGATTACGGTTGCACCGTAAAAGGAGAGGTTCTGTTCCGTCGCGGGATTTCGCCATGGTAAGACGTCTGCGTCCTAGCTCCGGATTTATCTGCCTCNATCCTTTGAAGAAGGGCCTTCCATCTTGGCAAGCTTTTACTTTTCGGGTACCGCTGCTTGGCGGGTGGGAATGCTGCTGGTGCTGCTTCAGGAAACCCGA

>22924470

GGGAAATCTCAAATCTGATGACTGGTTTCTGCTTTTGTAAGGAATTTGGATCTCAAGAGACAATGCAGATTGGTAGTCCCTGTGAATTTTTTTTTTTTTTNGACTGAGTCTCACTCTGTCGCCCAGACTGGAGTGCAGTGGTGCCATCTCGGCTCGCTGCAACCTCCGCCTCCTGGGTTCATACTAATCTGCCTCGGCATC

>22938826

ATGGTGGTTCTTTATCATGGTATCTTAGTTCCTTCCATGCTAGACACTATATGTAAAGTGTTGTTAGTAAGAACAATATGAGGTCAATTTTTTTTTTTTTNGAGACAGAGTCTTGCTCTGTTTGGAGTGCAATGACCCAGCCTCGGCACACTACAACCTCTGCCTCTCGGGTTCAAGCGATTCTCCTGCCTCAGCCTTCCG

>22946428

GTGTTGACAGGGCCATACTCCCTCAATGGATAGGAGGGATCTGTTCTAGGCCTCTCCAAGCTCTGGCAGTTCCTTGACTTGTGGCTGCATAACTAGCCTTNATGTGGCATTTTCCCTGTGTGCTGGGGATATTCTTAAGTGAAACTTGCTTATATTTATCTTTAGGGGAGCTTTTACGATTGTGGAAATTAGAAATGACTC

>22949529

TACGCATTGTGGGCTGTTGGCACCTTTGTCAAAAATTAGTATGGTTTTTTTTTTGGGACTTTATTCTGTTTCATATGTCAATTCTTTTTTTTTTTTTTTTNAAGTAATGCTGTTCTGGTTACTGTAGCTTTGTAGTGTATGTTGAAGTCAGGTAATTTGATAACTCCACGTTTGTTTTTTGGCTCAAGATTGACTTGCCAA

>22962201

TCCACCTTCTGAGTTAAAATGATTTTCTTCCCTCAGCCTCCTGAGTAGCTGGGACTACAGGTGCATGCCACCACGCCTGGTGGTGCATTTTTTTTTTTTTNGTATTTTTAGTAGAGACAGAGTTTCACCGTGTTAGCCAGGATGGTCTCGATCTCCTGACCTCGTGATCCTCTCACCTCAGCCTCCCAGAGTGCTGGGATT

>22991992

AAAAAGTTTTATTATTCAATAAAATAAACAAATCAGAAAATTTTTTAAAGTTTGAAGAAACATATCGGAATTTCTTCTCAACCTAAAATGTTTTTTTTTTNCCTTTTAATGAGTATATCTTCCTCATTGAAATTTTTGTTGTACAAATGTTTAATATGATTTCAGAATACCTTTTTTAACCACATATTTCTGACCGGCTTA

>23004988

CAAAATTTTTCTCCCATTCTGTAGGTTGCCTGTTCACTCTGATGATAGTTTCTCTTGCTGAGCACAAGCTTTTCAGTTTAATTAGATCACATTTTTTTTTNGACTTTTGACATTGTTTATTAGGTTCAAAAATGCTTCACAAAAGCCTAACAATGGTTCTGTGGAAACCAGTACATCTGAGGCCCTTTCTGTTTTTCTGAG

>23030235

GGGATCTGTAGACTGGAGCTGTTCCTATTCAGCCATCTTGGCTCCACCCACCCTTATTATTATTTGAAAAATAAAAGAACTTACTCTGGGAAAAAAAAAANGGCCAGTTACCACAAATGGTAATGGTAGCTTGGGCTGAACTGGGTTAACACAGCAATGTCCTAGGGCTCTCTGTCTTAGAAGGGACTCAATAAAGGGTGT

>23037018

TAATGCAAGTTGGGCTTAAAACTTACATGACTGGTTGATAGGTGCAGCAAACCACCATGGCACATCTATACCTATGTAACAAACCTGCATGTTCTGCACANGAGTCCCAGAACTTAAAGTAAAATAAAATTACAAAATAAAAACATTAAAAAATAACAAAAATGTGATCTGTATTATAATATGGAAATGTATGTATAAATT

>23042071

TAAATAATAATTTAATCTGCACTCAAAAAAGTCAGGGCTGAAATCTAATATTAGGTATTATGCTTTTTCTTTGAAACAATTTCTTTAGCTGCTTTTTTTTNATTAAAGATAAAATTATAGCAAGGCCAATTTGTATGCAAGGTGAATTTCAGGCTTATTATGCTTGCCTGATTGTTTGCATAAAATGCAGCAATAATTCAT

>23045487

CTTAAATCTGGGAGGCAGAGGTTGCAGTGAACTGAGATTGCACAATTAAACTCCAGTCTGTGCAACAAGAGAGAAACTCTGTCTCAAAAAAAAAAAAAAANCAAAAACAAAAATGTTTTTACTAACCTTATTGCAACTTACATAGACCATTCACAATGTGCTTAGAACTGATGTTCTCTTAAATAACCCTCTTTCCTGGGC

>23045916

TTTTCTATAATTTTATACTGGAAATTATCCAGATACATAATATCAAATAATAGCCTTTGATCCTAAATTATGACAAGTTTGTTTATAGCATTTAGTTTTTNACATTTGTTATAGGAGTTACTAAGCAATTATTTTAGGCTGGGTATGATGGTTCAGGTCTGTAATCCCAGCATTCTGAGACGCTTTGGTGGGTGGATCACC

>23060487

AACAGCAACCCTTAGATGCTTTACCACGCTAGACCCAGAGGGGCCAGAAGGCTGCCTTATTCTTAATATGCATTTTATCACCCAATCTGCTCTTGACATTNGGAAAAACCTCTGAAAATTGGATCCTGACCCTAAAATCCAACAATAGAACTTAATTACCCACATCTTTAAGGTGTGCAATGATAGAGAAGAGGCAGCCAA

>23076123

TTCAACCAACCAACTTAAGTTTATAAGGATTTTATTATTATTAGGAAACTGAACATTATAAATATAGCCCCTCTTCTCCCATGTATCACAGCCACATGGGNACTTAGGTGCTTCCCTTTCTATGAAGAGACAAGAAGGCACCTTTGTTTTTTTATTATTATTTTTTATTTTTCTTTTATTATTATACTTTAAGTTTTAGGG

>23081502

TTTTACATGTTATTGGATGTATCAAATCTTAAAACTGATGTCTTTCTGACAAAATACTCTTCTGCACTGACCCTTTTTATTGCTGAGAATTTTTTTTTTTNGCCTTGAAGACAATTTGACCTGATTTCATAAAAGTGCTAAGAGCTTTTTCTGTTGTTTGTTCTATGATAATTTCTTTTTGTTGACTGCTTTTATTTCTTC

>23093219

TATTCAACATTCTTAAGGGAAATAATTTTCAACTCAGAATTTCATATCCAGCCAAACTAAGCTTCACAATTGAAGGAGAAATAAAATCCTTTACAGACAANCAAATTCTGAGAGATTTTGTCACCACCAGACCTGCATTATAAGAGCTCTTGAAGGAAGCATTAAACGTGGGAATGAACAACCGATACCAGCCACTGCAAA

>23123237

TTAAATAAAATCTATCTCATGAAAATTTATAATTTTTAGGTCAAAACTCTCCAGACCTCTTATATAGGAATTTGGGCAAGATAAAAAACAAACAAACAAANAAAAAAAAACAGAATATGTTGCAGTCTCACCAATGTACTTTAATGTAGTAGTTTCTCATTGTCTGAACTAGTACCTGGGGTGTTTTGTCTTATGTTCAAG

>23189878

TAACTTTAGGAATAGCTTTTGTTAGGCCTGTTAGTCTGAGGAGGGATGCTAAAATTCCAGATAGTCCTCCCTGTGACTTGGATTTGGGAAAAAAAAAAAANGTATGTCTTTTTGATTGGTGAGCCCAGCTACCTAAAGAAGGTAACAGAGTCCTGGAGTTTATACTAGAAATCATTCTTAAAGAGGAAACTAGAAAAGCAC

>23193400

CATATGTAACTAACCTGCACAATGTGCACATGTACCCTAAAACTTAAAGTATAATAAAAAAAAAGAAAAGAAAAAAAAAAGAAAAATGGAAGAGGGTTACNTAATGACAAGTTTGTAAACAGTTATCCAGAAATAAGCCTGAGGAGGCATTCTGGCTGGTGTGTCACAGCCAGTTTGTTGGGTTGTGGGGAACACATTTTG

>23232566

CACTGGTTATCTGAGTACATTGGTAGCCTCAGAATTTTTGAGCTGGTATTATCCCCTTGTTTCCTTTTGATCTACGTCTTTTAACGGTCTTTTTTTTTTTNCTCACCTTCAGGCCATCAAATCTCAAATGGTAATGCTAAGAGAGCCACAAATGATGGCTCCCTCTTACTGGGTACCCTTATATAGGCCTTGTGAGAAGAT

>23233970

TCTGCAGAGCTGGGACCTAGGGCTTCCTCAAGTCAGGGCTGTGACACCCTATTTGGGACTCTGGTTTCTGGCATCTCCAAGCTCTTGGGAACCACCACCANATTTCCATCGTCCAGATGTGGGTGCCTGCAGCAGAAACTGTGTGTGGTACATTTTGTCTAGCTACAACATCAGACAGAGCTGGCATATTATATATGCATA

>23255678

GAAAACACAGCAGCCCTATACAGAAGGGACCAGACCTTTTCGGGGGGGTGGGGTAGAAGAAGAAACAGAAAAAAACAACAACAGCAACAACAAAAAAAAANCCCCACAAAAATCCCATCTGAGGGTTAGTAGCTTCAAAGGCTAAATAATTAGACAAACTCACAAAGTGAAAAAATGTTAAAAACCCATAAGAACAGAGGG

>23260566

TAAATGGAATTATTTTATGCCAATGACATCCAGGGACCAACTGGAATCAATGAATGTTAGCATTGAGTTGCCAACAAGCTTTTTGATGGAACTTTTTTTTNATATTTTAAATTTTAGTGTACATGTGCACAATGTATAGGTTAGTTTTATATATATATATATATGCATGCCATGTTAGTGTGCTGCACCCAGCAACTCATC

>23263330

GTGACCTTCTTGAGACCTTTTAAAGTGAATGAATATCTGGCCCTAAAAGCTGACAGCAAGAATTGTGCCTGAATTCTTGATAATGTGCTTTTTTTTTTTTNACAAGACAAGAAAGATGTTTCCATGAAGAGAATATTAAAAACATAAATTTAGAAAAATCACTAAGAGAAATTTTCTCATTCCAATGGTCCTTCTAAAAAA

>23267057

AAAGGTCCTCAAAAGGAGAGTCTAAAGACAGATTTAGACGTTACATACCATCCTCTGCTGTGGGGGCACCAGTCTCTTTTTCTTTTTCTTTTTTTTTTTTNGTTTTGTTTTTGCTTTTGTTTTTTGAGACAGAGTCTCACTCTGTCACCCAGGCTGGAGTACAGTGGCATGATCTTGGCTCACTACAGCCTCTGCCTCCTG

>23267780

TTCATAGAAGAATGAGAAAAAAAAAAATCACTTAGGTAGTGAACTTTTACAAGCTGACATTAGTCACAAAGAAAAAAAAAAGAAAAAATGTATTTTTTTTNAAATGTGGCTATGTTTTACAGATGGTTGAAAGACTTTAAAATATATACTAACCTAGACTCAGCCTCACAAAAAGGGAAAGTACTCATGGCTCAGCACTTT

>23271743

ACTAAAACCCTTAATGATTGACTGTTTCCTTTCATGGAAAAACAGAAAAAGATTTTAACACAAAGATGGGCATTTGAAAAAACCTAAATTAAAAAAAAAANCTCTAACATTTGTGGTTCTTCTAAAGAACTGTCAAAACAAATGAATATTTGGCCCTGAAAGCTGACAACAAACTTTGTACCAGGACTCTTGATTATGAGT

>23273193

GTCAAAGCAGGGAGGGGGATTTCAGGACATCTAACCACCCATTGGATTTACCTTGTCTGCTGCCTAGACAAAGCGAATTTATCAAGACCAGAAAAAAAAANTGCAAGTCAAAGAGTAATTCCCATGGAGCTCACTGTATGGAAGATTGGAGTTTTATTACTACTCACATGAGTCTCTCTGAAAACTAAGGGATCAGAGATT

>23274486

TTTGGGACATACACACAGAACAGGTGGACTTTAATATGGTTGAGGAACAAACAGAAAGTTAGAGATTTTATTTGAAAGAGAGTGAGGAGAGAGGAGAAGANAGAGAGAGAGAGAGAGAGAGAGAAAGGAGAGAGGAGAGATATTACATATTGTTCAAGAAAGTTCACTGGCACTAGTAAGGTATGGGGAGCTCTGATTTGT

>23299537

ATGAATTATGCCCCAGTTAGCTATAGTACCCACTTCCTTGTTTTGTTTTGTTTTTAACATGAAGTCTCACTCTGTCACCAGGCTGGAGTGCAGTGGTGCCNCCTCTGCCTCCCGGGTTCAAGCAATTCTCCTGCCTCAGCCTCCCGAGTAGCTGGGACCACTAATTTTTGTATTTTTAGTAGAGACGGAGTTTTACCTTGT

>23301414

GTTTCTTCCCTCTACATTTGGGTTGGTTTTTCCCTCCCCATTTGGGTTGGTTTTTCCCTCCATGTAAAATCCCAGCATTGCCCAATAAATTTAAACAATTNTTTATGAAACAAGTTAATTTTCTTGTGCTGGGAGGAATATTATAGGAACAGCCAATTAAACTGAAACCTCTTTTTCTAACTTCTGCCTGAAAGGATGGAG

>23305585

GTTTATGTGTAAGGTGTGTAAGGAAAATAAAATACATTTTTGGTAAAAAGATTATAAGGAGGCATAAGATGTGAATTTTTACTTGCACGAAAATGTTAAANTGTTTTGAAGGTTTAAGAAACCTTCAAATGCTGTGTATAAATATATTGACTAAAGTTGAAGGGGTATCATCCAGTTTTTCTGTAATTGAGCTTTGAAATA

>23307727

TTATTTACTTTGCCACCCTTGTGGGAACTGCCTTACTCACTGCTATTTGCAGTAGAACAATATGCTATAGCATCCTCAGGGTGGAATATCAGACAAAAAANTCTCAATTATTATAGCATTTTCCCTAATTATTATCCAGATAGCAGGAATAATAGTTACTAAAAGAAAGTAACACATGAGTTCTTCCAAACACATGCTTCT

>23327307

GTTTTATTTATTTCTAGTTTAGCCATTATACATTTTATTTATTTTTCTCTTTAGATCTTTAATTCCTTGTTTTGCATTGAGTAAGATCTCTTTTTTTTTTNGTGAGGTGGAGTGTAGTTCTGTCACACAGGCAGGAATGCGGTGGCATGATCTCAGCTCACTGCAACATTCATCTCCTGGGTTCAGACAATTCTTCTTCCT

>23358082

TTTCAAAAGAAGACATTTATGCAGCCAACAGACAGATGAAAAAATGCTCATCATCACTGGTAATCAGAGAAGTGCAAATCAAAACCACAATGAGATACCANCTCACACCAGTTAGAATGGCGATCATTAAAAAGTCAGGAAACAACAGGTGCTGGAGAGGATGTGGAGAAATAGGAATGCTTTTACACTGTTGGTGGGAGT

>23364103

ATTCAGGAGACTCACCTCATGTACAAAGACACATACAAGCTCAAAATAAATGGATGAAGGAATATTTACCAAGCAAATGGAAAGCAAAAAAAAAAAAAAANGAAAGAAAGAAAAAGCAGGGGTTGCAATTTAGTGTCTGATAAAACAGTCTTTAAACCAAGAAAGATCAAAAAAGGCATATAAAGGTATCAATGCAACAAG

>23395360

ATTATGATTTGATTTTTGTACATGGTGAGAGATAGGTGTCTAGTTTCATTTTTCTGCATATGGATATCCAGTTAATTGAGCAACATTTATTTAAAAAAAANCTGTCTCTTTCCCCAGTATATGTTCTTCACACCATTGTTGAAAATGTGTTTTCTGTAGGAGCATAGATTTGTTTCTTGGTTCTCTATTCTGTTCCATTGG

>23427145

AATGGTGTGAACCTGGGAGGCGTAACTTGCAGTGAGCAGCGATTGCACCACTGCACTCCAGCCTGGGCAGTACAGCAAGACTCCATCTCAAAAAAAAAAANGAAAGAAAAAAAAGAAAAATCTACTGAGCATACAAAATACATTAGAAACTTTTAATAATAGACTAGATATAGCAGAAGAAATAATCTTAGAACTTGAAGA

>23447465

CACCCTCCCAAGACTAAACCAGGAAGAAGTTGAATCCCTGAATAGACTAATAATAGGCTCTGAAATTGAGGCAATAATTAAGAGCCTACCAACCAAAAAANGTCCAGGACCAGATGGATTCACAGCCAAATTCTCCCGGAGGTACAAAGAGGGGCTGGTACCATTCCTTCAATGAATAGAAAAAGAGGGAATCCTCCCTAA

>23454408

GCACTGATTACTAACCACAATACATGTGCTCCTAATCTTAGCTCAAGCTTATTAACTATACAAATGTAGTTATTGATATGGCCATATGTGGTACTCTACANTGATTAGTGAAAACATGGAGTTTTCATAAAGACAAGAAGTGTCATTGACCCTGTTGGTTGCCTACCTAATGCCTCTCTTATTCCTGAAAACGTTTTTAAG

>23459385

CTTTCAAAGGACAAAAACAATAAAAAAACAAGACTTTGAAGAAATCATAAAGCCTTAAAGACCTTTGTTTTAATGGGCTTGATATAGGGAAAAAAAAAAANGTAAATAACCTAGTTAAAGAAAAGTGCTGATCAAGGCTCCCTTGCACAGTTAAAACAACCAAAGAGGACACTCATATTCAAATAGGTATCAAAAGTGTAC

>23463946

AATTCTTCAGTGAAACAGAAAAGTTTTACAAAAAAGTCAGTTACCCAAACTGACACAAGAAGAACTAGAAAACTTCACTTGCTATATCATTTTGAAAAAANTGCATCCACATTTAAAATATCCCTATAAAAAAGTATTAGAATAAGTGGCTTTTATAGTTGCATTCTACTACACATTCAAGGAAAGAAATGTTTCAGAGAA

>23474862

TTGATTTTGAGGGTGAAGATTAATACTACTCTGCCATGATGAGAATATGCATTTTCTTACCTGTGACACCACCAGGTCATTAGAATATATCTACATTTTTNGTAGGTATATGAAAATATTTTTTATTATTTAATATGCAGTTCTTAAAGATTATTAAAATTGAGCATAGCCTAAGCTAAAAATTAATATTTCATAATGGAT

>23475272

TTATATGTTTAACTGATAGATTTTTGCCCTCTCTTCACTATGCATTTATCCCATATCTCTCTCTCTCTCACACCAGTATAAAATTCTTTTTTTTTTTTTTNGAGACGGAGTTTCGCTCTTGTTGCCCAGGCTGGAGTGCAATGGCGTGATGTCGGCTCACCACAACCTCCGCCTCCTGGGTTCAAGCGATTCTTCTGCCTC

>23476021

GTAAGATTATCATATTTAAGAAATATTTATAAACAACTAAAACTTAGCCATTTAAGACACAGTGATGTTACTTAACTAAAAAGTTGTTTTTTTTTTTGTTNTTTTTTTTTTGTTTTTTTTTTGTTTTTTTTTCGTAAACACAGAAGATGGTGGATACACTTTTGATCTCAACATGACTTCTTCTAGGGGGCCATTTCCATT

>23487786

TATTTAATATTTATCTCAGAGAAAAGAACAAAGGAAAAAAAAGAGGTTCAGTCCAAGGATTCAGAGAATAATACCAGTTTAGGCAGGGAACCAAGAAGAANTGACTTTGAACTCAGAATCACATGAGAATTATTCTCACTTAGGAGAGAGAGACAATCAAGTAGTCAGAAAATTTTACCCGTTACCAAAGAGACAAGAAAG

>28464916

TTTTTTACATATGAGGAAAGAGTCAGAAACGGAACTTGATTTATTTAACCAAAATCACACATATAAGAGGCTGAACTGGACTATTCTTTTTTTTTTTTTTNAAAGAGATGGGGATCTCACTATATTGCCCAGGCTGGTCTCACACTCCTGGCATCAAGTGATCCTCCTGCCTCAGCCTCTCAAGTAGCTGGGATTACAGGT

>28470884

CACTTAGCTATTACTTAACCAGCAGATCTCAGGTTGAGCAGTATCACCCCCTCATGAGAGCCTTCTTTCATCCTCCAGGAGAAGGGAAATATTTTTTTTTNCAGAGACAGGGTTGTGCTCTGTGGTCGAGGATAGAGTACAGTGGTGTTATCATAGTTCATGGTAGCCTCAAACTCCGGGGCTCAAGAGCTCTTTCCGTCT

>28474567

AGGAGAAGGGCGTGAACCCGGGAGGCGGAGCCTGCAGTGAGCCGAGATCGTGCCACTGCACTCTAGCCCGGGCGACAGAGCAAGACTCCGTCTCAAAAAANTAAAAAATAAAAAATCCATAACGGCGTGTCTATGCTAAATAATCATAAATAATTGAGTCACCAAAAACTGACTGCTCAGAGACAAAATACAGAACAGTAA

>28477397

CTTCCCTAGAGTACTGCCATGATAGCTAGAGCTCCAGCAGTTATTCTGGACCATCAGGCAACCCATGGAAATGGCAGCCATGATGCAAGAACTGTGGAGCNGAAAGAACCTGGATCCTTTAATGACTGTGGAGCTACTAAGCCAGCTCTGCCTATTTCTGGACTTTCTTAAGTGCAAGAAAAAAAACAAAAACCTTTATCT

>28492201

ACATGTGTACATATGTAACTAACCTGCACATTGAGCACATGTACCCTAAAACTTAAAGTGTAACAATAAAAAAAATACTATAAGAGAATACAAAAAAAAANGAACATTATGAAAGAACTCCAGGAGTTCTTCCCTTTAGCCAATAACTCACCAATAACTGTGCCAGTGAAAAGGGGTTAGGGTGAGGCATACCCCATTATA

>28526671

ATCCCAACACTTTGGGAGGCTGAGGTGGGAGGATCAGTTGAGGCCAAGATGTTGAGACCAGCCTGGGCTCCATACCAAAACCCATCTCTAAAAAAAAAAANTGCTGGATGTGATGTCACATACCTGCAGTCCTTGTTACTTGGGAGGTTAAGGTTGGAAGATCACTAGAGCCCAGGAGTTTGAGGTTACAGTGGGCCATGA

>28527792

TCCATGTGGATATTATCTCATATGTTTATTAGCCACATAAACTACTCCCCATTCATAGCCTTTCCTCATTTTTTAAAGATGGTTAAATTTTTTTTTTTTTNGAGACACAGTCTTATTCTGTTGCCCAGGTTGGAGTGCAGTGGCACCATCTCGGCTCACTGCAAGCTCCGCCTCCCGGGCACGCAGTTCTCCTGCCTCAGC

>28530689

CCTAAATATATTCTCATGAAAATGGCCTTCATGAAGACTAGCATATTATAAAAATCAAACAACAGTAGGATAAATATACTACCCACGGGGGAAAAAAAAANCAAAACTCTGTCAAAGTGTTAAATACAATAGTACTTCAGCTCTTTCACTGTTATTTAGCGCCTTAAATTTGCCAAATGTCAAAGAAAGTCAACAGAACAT

>28544394

TTTTGTAGAGACGGGGTTTCTGTATGTTGCTCAGCCTCCCAAAGTGCTGAGATTACAGGTGTGAGCCACCTTGTCCAGGCAAAATTGCTGTTTTTTTTTTNGAGACAGGGTCTCACTCTGTCGCCCAGGCTGAAGTTCAGTGTTGATCTCAGCTCACTACAGCCTCTGCCTCACAGGCTCAAGCCATCTTCCCTCCTCAGA

>28547102

TGGCTTGAGCCCAGGAGGCAGAGGTTGCAGTGAGCCAAGATTGTGCCACTGCACTCCAGCATGGATGATGGAGACAGAACTTGTCTTAAAAAAAAAAAAANGTGTGCCCAATGCCACACCAAGGTAAAATGAGGCAAGCACAAGAGTGAGCCAAATCTCCATGCTCTATTTATGCAGAAGACAGGTCAGGCCACTGAATTC

>28559389

ATTGCAAATACCTAATTTACATAACATTCTGTAAGTATTGAAAAAAATGAGCGATACCTATTCATATGAATCCTGAGTTTCCTTTGGATTTTTTTTTTTTNGGAAAATTGAAGTAAGAAGTACTTTGTTTTAAAAATTTGTTTTTTTATTTTTGCCTTCTTTTTCCACAGTACTTTATTTAGGTGCAAATTATATGAGTAG

>28565500

TATTTATAATGTAATAATGTGATGCTTTTGATTGTATGATTTTATGTTAGCGAAAGGGGTTTCATGTTAGTTTTTCATTTCTACTGTGTTTTGATGTTGTNTTTAATTGATATGGGGAGAGGGAGAAAAGATAGCTTTCAATGGATAAAACTTTACTTTAATGAAAACAAGCTTTAGGTTCACACAGGACTGGATTTAATC

>28596574

TGCAGCCTCCACCTCCTGGGTTCAAGCAATTCTCTGCCTCAGCCTCCCAAGTAGCTGGATTACAGGCACCTGCCACTACACCTGGCTAATTTTTTTTTTTNGTATTTTTAATAGAGATGGGGTTTGACGGTCTTGGCCAGGCTGGTCTTGAACTCCTGACCTCGTGATCCACCCGCCTTGGCCTCCCAAAGTGCTAGGATT

>28605804

GGAATTTATCTTAAATTTGACCTCGTTTCTGAGAAAATTTAATTTCTAAATAGCTAAATTTTCACTTTTTAATTTATGTCTTCTTTTTAAAACTCTCATTNGTGTCTCTAATTTTTGTTTTCTTCCTATTTTTTTTTATTTCCAACTTTTATGTTCAGGGGTACATGTGCAAGTTTGTTACATGGGTAACTTGAGGGTCAT

>28611443

CAGAGGTTGCAGTGAGCCGAGATTCTGCTATTGCACTCCAGCCTGGGCAATGAGAGTGAAACTGCCTCTCAAAAAAAAAAAAAAAGAGAAAAAAAAAAAANCCCAAAATCAAACTAACTAAATGCTTTGTTCTTCTTCTTCTTTTTAGTATTATATTTTTTTCCCAAAGTGTTGGGATTACAGGCGTGAGCTATTGTGCCT

>28620212

AACCCAGGAGACAGAGGTTGCAGTGAGCCAACACAGTACCACTGCACTCCAGCCTCGGTGACAGAGGGAGACTCTGTCTCAAAAACAAACAAAAAAAAAANCAAAACAAAAAAACCAAAAAACTTCTGTCCCAAACAAACAAACAAGCAAACTTCTAAAAATCAAATAGAATGCCTGGGCCTCACGCCTGTAATCCCAGCA

>28620603

AGCCAAGATCATGCCACTGCACTCCAGCCTGGGTGACAAGAGCAAAACTCCATCTCAAAAAAAAAAAAAAAATCAAGTAGAAAACAACCCCCAAAAATAGNGGCAAATGCCATAGCACTTCATACATTTCATAGAAGAAAAAATATAAGTGCCTAATAAAGATATAAAAGAATGCTCAGGGAAATGCAAATTAAAACCATA

>28620605

CCAAGATCATGCCACTGCACTCCAGCCTGGGTGACAAGAGCAAAACTCCATCTCAAAAAAAAAAAAAAAATCAAGTAGAAAACAACCCCCAAAAATAGTGNCAAATGCCATAGCACTTCATACATTTCATAGAAGAAAAAATATAAGTGCCTAATAAAGATATAAAAGAATGCTCAGGGAAATGCAAATTAAAACCATACT

>28638279

GTTTTAATCTGCATTTCTCTAATAGCTACTGATGATGACCATTTTTTCATTTGCTTATTTGCCAGTTGCAAATCTTTATTAGTGAAGTATCTGTTCACATNTTTTGCCCATTTTTTAAAAGTTGGGTTGTTTTCTTACAATTGAAGTTTATTTTTTCTTATACTCAAAATTTTAATTGCCACATAATTAATTGTACATATT

>28648443

ATCAATCAGTTCTTAGTATATAAAATATTTTGTGATATCCCTTTTAACATAAGAGGTATTCAGTAATGTGTAATTTAGTTTCAAATGTGGGTTTTTTTTTNAAAAGCTAATCATATTACAGTATATTCAGAGAACAGCAATATGATATTGATCCTGTGGACTTTATCCTGTGGAAGCTTTCTTTATGGTACAGAGAGCTAT

>28653378

AATGGCATGAACCCGGGAGGTGGAGACTGCAGTGAGCCAAGATCATGCCACTGCACTCCAGCCTGGGCAACAGAGGCAGACTCCATCTCAAAAAAAAAAANGAAAACGAAATAAATCAATATAGGTATAAGGATATATGAACAAGGGAGGAAACAATTATATACCATTTATATATACCTATATGCATTCATATTAAATCAA

>28658455

ATTTACTCTCAGGGGCCTGCATGGCCATATAGATTTTTTTTTAACAGAGTTTCCAATTCGTCTCATTGTAGCATTTTTTAGTAACTTTGCATCCTTCTTTNATGAAGTTGTATAAAGAGGAGCAAGTAATAGGAGAGTTGCTTCTTCCTGTTAGTGTATTTGTCACTCTTAGTTCCTAGTAAGCAGTTTTTTTTATCGGAC

>28742526

CCTGCATCAATATTACGTACATCCCAAAATAGAAAATACAGAAAAAAGTTTCAAACATGCAATAAACAGGAAATAAAAAATATTTAATTTTTTTTTTTTTNGACACGGAATCTCACTTTGTTTCCAGGCTGGAGTGCTGTAGCACAATCTCAGCTCACTGCAACCTTGTGATCCCCCCGCCTCAGCCTTCAAAAGTGCTGG

>28762433

TTGCCCAAGATTTTACAATGAGCAGTATCACTGGGTGTATGTTAGGCCTAACATTAGATAGTCATTTGAAGTAAATTATTCTACTCTTTTATATTGCTTTNAGCAATATTAAGAAAATGGAAAAACAGTCTCAAAAGCTTTATTTAGTTTTTTACTTATTTATTTTTTGAGACAGGGTCTTGCTCTGTTGTCTGAGGCTGG

>28780017

TACAATATACAAAGAATTAATAAACTGTTGTTTCTTTTCTTTCTTTTTTATTTTTTTTAGAAAGTTACAATAGTTTTCATTTCAGCTTGACTTTTATAGCNGGATGCCGAGGGTCAGGTTTTACAAAAATATATAAGGACCTAACCAATTTTCCAATGTGCCTCTCTTAAACTTTTCTTTTTATTTTTTTTCTGAGATGGA

>28781418

CTCTATTATCTAATTAATCTTTCCAACAGACTGTTTTCATCACTCCCTCACTCAGGAAAAGGCAGGAGGCTTTGAATATTTGAAAATTAAGAAAAAAAAANCCCCAGACATATAATAAACAGTAAGATATTAAACATGTGACAATAATAAGGCAAAAATATTTAATTATTTGTAATCAATAATCCAGGGAAGAGACCAAAT
