# Supplementary material for: A calibrated human Y-chromosomal phylogeny based on resequencing
Source: HighWire-hosted journal article supplement (doi:10.1101/gr.143198.112), 2012-10-04
Supplement: Supplemental_Table8_BEAST.docx [file Supplemental_Table8_BEAST.docx]

Table S7. BEAST run results

|  | First run | | Second run | | Combining two runs | |
| --- | --- | --- | --- | --- | --- | --- |
|  | Mean | ESS | Mean | ESS | Mean | ESS |
| TMRCA | 108,000 | 529 | 110,000 | 549 | 108,000 | 1033 |
| DR | 74,400 | 689 | 74,800 | 906 | 74,600 | 1581 |
| GR | 52,100 | 1360 | 52,200 | 1731 | 52,200 | 3186 |
| R1b | 11,200 | 3701 | 11,200 | 3774 | 11,200 | 7439 |
