# Supplementary material for: A calibrated human Y-chromosomal phylogeny based on resequencing
Source: HighWire-hosted journal article supplement (doi:10.1101/gr.143198.112), 2012-10-04
Supplement: SupplementalFigures.docx [file SupplementalFigures.docx]

Supplemental Figure 1. Maximum parsimony phylogenetic tree (Tree 1) of 36 Y chromosomes based on all variants. Inset shows the number of variants found in the CEPH/Utah Pedigree 1463 males. The number of presumed somatic variants in each individual is shown inside the square.

Supplemental Figure 2. Maximum parsimony phylogenetic tree (Tree 2) of 36 Y chromosomes based on all SNPs.

Supplemental Figure 3.1 – 3.21. GENETREE results using 21 segments of the Y chromosome.

*: the length of Y chromosome sequence for each data partition.

Supplemental Figure 4. Phylogenetic tree of 29 individuals generated by BEAST. Sample codes are shown on the right. Node bars display the height 95% of nodes of interest. Node ages are marked above the node bars.
